# Supplementary material
Source: PubMed Central journal article supplement (PMC5883095)
Supplement: ajcr0008-0450-f8.pdf [file ajcr0008-0450-f8.pdf]

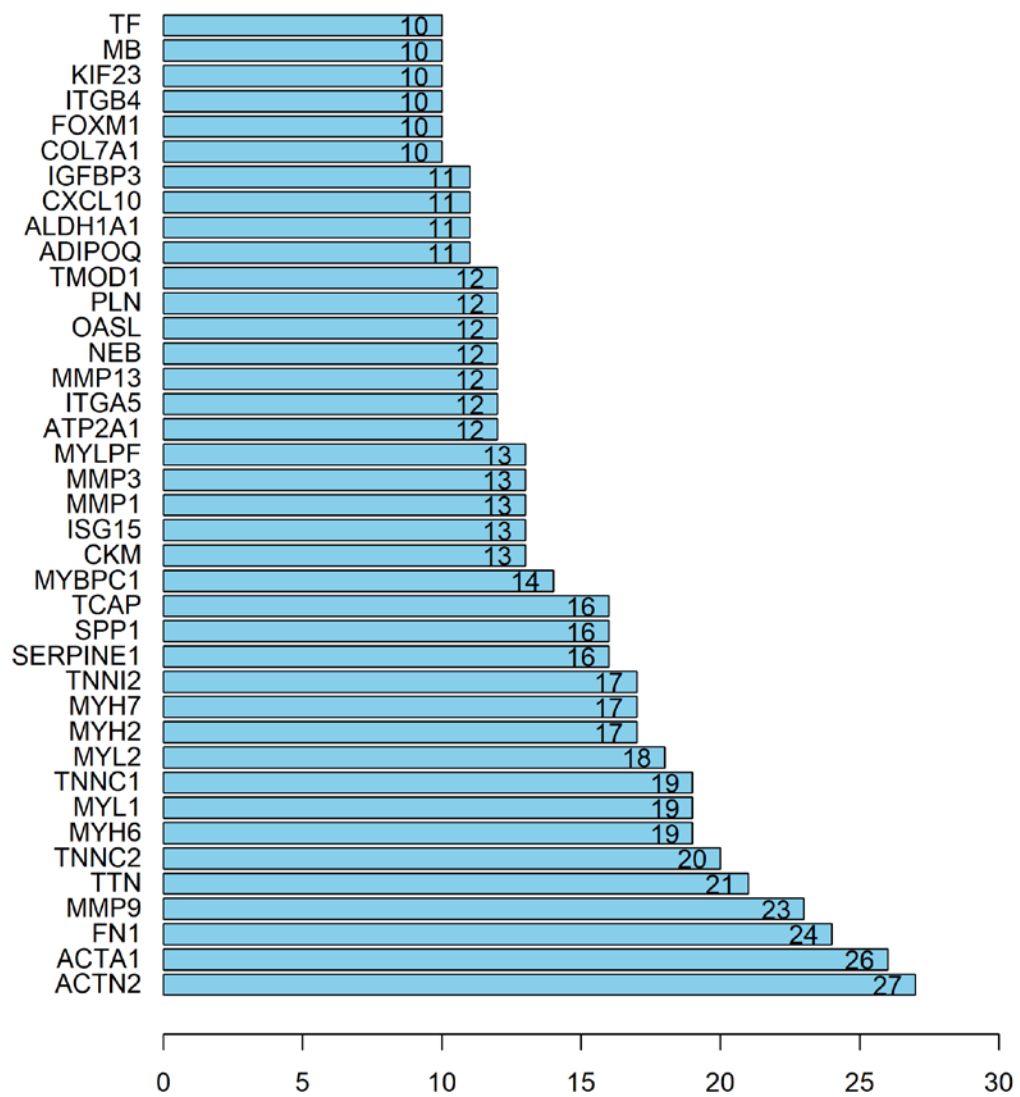

Supplementary Figure 1 The identified central node genes (more than 10 connections/interactions).

**Supplementary materials**

**The significantly changed genes of GSE13601**

| Downregulated |          |          |          | Upregulated |          |          |          |
|---------------|----------|----------|----------|-------------|----------|----------|----------|
| ID            | logFC    | t        | P.Value  | ID          | logFC    | t        | P.Value  |
| SERPINF1      | -1.00077 | -4.33027 | 5.76E-05 | DNAJC2      | 1.000384 | 3.325036 | 0.001514 |
| CTNNA2        | -1.00218 | -3.6553  | 0.000543 | LRRC15      | 1.001208 | 3.026136 | 0.003649 |
| LMO1          | -1.00298 | -6.26996 | 4.37E-08 | CKAP4       | 1.002912 | 5.034806 | 4.68E-06 |
| LAMB2         | -1.00636 | -6.13855 | 7.27E-08 | ADAM12      | 1.003678 | 4.225826 | 8.25E-05 |
| LECT1         | -1.00716 | -3.43596 | 0.001079 | BICD2       | 1.004566 | 6.440467 | 2.26E-08 |
| GAS7          | -1.00773 | -3.6084  | 0.00063  | GALE        | 1.004687 | 3.061862 | 0.003293 |
| TEK           | -1.01296 | -5.52869 | 7.46E-07 | CDK7        | 1.00522  | 4.071674 | 0.000139 |
| AL109706      | -1.01321 | -3.23055 | 0.002009 | BTN3A3      | 1.005387 | 4.148552 | 0.000107 |
| ITIH4         | -1.01323 | -5.42596 | 1.10E-06 | PLEKHM2     | 1.006134 | 2.876185 | 0.005569 |
| AC090627.     | -1.01385 | -4.06544 | 0.000142 | ITCH        | 1.006275 | 4.057548 | 0.000146 |
| AKAP6         | -1.01429 | -3.42758 | 0.001107 | CYFIP1      | 1.006737 | 6.075976 | 9.25E-08 |
| FBLN2         | -1.01477 | -3.58087 | 0.000687 | GEMIN2      | 1.006962 | 3.812984 | 0.000327 |
| TTC28         | -1.015   | -3.58657 | 0.000675 | LIMK2       | 1.007974 | 7.988671 | 5.22E-11 |
| PENK          | -1.02018 | -3.07721 | 0.00315  | KDEL3       | 1.008107 | 3.198389 | 0.00221  |
| AQP1          | -1.02153 | -4.08646 | 0.000132 | DHX8        | 1.00839  | 5.137994 | 3.20E-06 |
| RAPSN         | -1.0216  | -3.44864 | 0.001038 | BCAP31      | 1.008701 | 6.630478 | 1.08E-08 |
| C1orf21       | -1.02198 | -2.7886  | 0.007087 | COX6A1      | 1.010281 | 4.793793 | 1.12E-05 |
| CITED2        | -1.02242 | -4.74938 | 1.32E-05 | B2M         | 1.011592 | 5.847563 | 2.22E-07 |
| MST1L         | -1.0229  | -4.71174 | 1.51E-05 | SNRNP40     | 1.013089 | 5.780642 | 2.87E-07 |
| FEZ2          | -1.02436 | -3.53568 | 0.000792 | PDCL        | 1.013706 | 3.45426  | 0.00102  |
| CX3CL1        | -1.02636 | -5.10885 | 3.56E-06 | CDC45       | 1.015551 | 4.158608 | 0.000104 |
| CLDN8         | -1.02638 | -3.02809 | 0.003628 | PXDN        | 1.016013 | 4.576501 | 2.44E-05 |
| TLR5          | -1.02863 | -2.83955 | 0.006164 | RPN2        | 1.016349 | 5.865641 | 2.07E-07 |
| LMO2          | -1.02878 | -5.6987  | 3.92E-07 | POLR2E      | 1.017556 | 3.132668 | 0.002681 |
| IVD           | -1.02964 | -6.75007 | 6.74E-09 | PPIH        | 1.018057 | 4.855765 | 8.98E-06 |
| PHTF2         | -1.02973 | -3.71344 | 0.000451 | SDC4        | 1.01867  | 4.03938  | 0.000155 |
| SASH1         | -1.03377 | -5.85456 | 2.16E-07 | DAAM1       | 1.020591 | 4.735675 | 1.38E-05 |
| NDUFS7        | -1.03466 | -3.89052 | 0.000254 | CYP7B1      | 1.021414 | 3.398224 | 0.001212 |
| PPAP2B        | -1.0355  | -5.40154 | 1.20E-06 | EIF6        | 1.021868 | 6.759598 | 6.50E-09 |
| EDN3          | -1.03551 | -3.82367 | 0.000316 | IFNGR2      | 1.022726 | 5.440796 | 1.04E-06 |
| CFHR2         | -1.03614 | -2.76655 | 0.007525 | SYNCRIP     | 1.023227 | 6.88071  | 4.04E-09 |
| PINK1         | -1.0366  | -5.21542 | 2.40E-06 | SCNN1G      | 1.024879 | 3.771135 | 0.000375 |
| EFHD1         | -1.03705 | -4.19847 | 9.06E-05 | NEU1        | 1.02647  | 3.801912 | 0.000339 |
| AKAP1         | -1.04034 | -5.4949  | 8.47E-07 | LAT         | 1.02864  | 3.990199 | 0.000183 |
| F8            | -1.04138 | -4.25251 | 7.53E-05 | ZNF267      | 1.028737 | 4.57192  | 2.48E-05 |
| HSPA1L        | -1.04204 | -4.29106 | 6.60E-05 | PSMD11      | 1.029228 | 4.628371 | 2.03E-05 |
| PLAGL1        | -1.04396 | -4.95753 | 6.20E-06 | DR1         | 1.029457 | 8.621887 | 4.39E-12 |
| CD34          | -1.04461 | -6.91277 | 3.57E-09 | COL4A2      | 1.030144 | 4.23495  | 8.00E-05 |
| SLC4A4        | -1.04475 | -4.45917 | 3.68E-05 | PLXNC1      | 1.032637 | 4.525486 | 2.92E-05 |
| ERVH-1        | -1.04555 | -3.93269 | 0.000221 | GM2A        | 1.032893 | 6.605371 | 1.19E-08 |
| JAM3          | -1.04568 | -3.29639 | 0.00165  | FXYD3       | 1.033146 | 2.455719 | 0.016982 |
| HPN           | -1.04814 | -5.79088 | 2.76E-07 | PAQR3       | 1.033543 | 3.024337 | 0.003668 |

|           |          |          |          |          |          |          |          |
|-----------|----------|----------|----------|----------|----------|----------|----------|
| SGCE      | -1.04948 | -5.40699 | 1.18E-06 | ARFIP2   | 1.033581 | 3.736676 | 0.000419 |
| ACACB     | -1.05061 | -5.9554  | 1.47E-07 | ITK      | 1.033603 | 3.269036 | 0.001791 |
| ADCY1     | -1.05199 | -5.40932 | 1.17E-06 | TOM1L1   | 1.035264 | 3.508059 | 0.000863 |
| GUCY2C    | -1.05283 | -2.92643 | 0.00484  | TIAM1    | 1.036299 | 4.037299 | 0.000156 |
| OR7E24    | -1.05505 | -3.90572 | 0.000241 | IRAK1    | 1.036358 | 6.446546 | 2.20E-08 |
| ROR1      | -1.05574 | -3.98474 | 0.000186 | NAT1     | 1.036552 | 3.443206 | 0.001055 |
| C6        | -1.05753 | -4.15477 | 0.000105 | ETS2     | 1.037007 | 3.727773 | 0.000431 |
| YBX3      | -1.05763 | -4.44137 | 3.92E-05 | FBXL2    | 1.037071 | 3.214097 | 0.00211  |
| FZD7      | -1.05773 | -3.88778 | 0.000256 | TRIAP1   | 1.037646 | 2.842303 | 0.006117 |
| MGLL      | -1.05906 | -6.32574 | 3.52E-08 | 15-Sep   | 1.037758 | 4.164403 | 0.000102 |
| ALOX12    | -1.05917 | -3.77486 | 0.00037  | ADNP2    | 1.038474 | 3.117957 | 0.002799 |
| IL11RA    | -1.06038 | -7.05322 | 2.06E-09 | ODC1     | 1.038503 | 3.538552 | 0.000785 |
| VWA8      | -1.06189 | -5.6841  | 4.14E-07 | 9-Sep    | 1.038781 | 4.650161 | 1.88E-05 |
| FGF9      | -1.0626  | -4.85407 | 9.03E-06 | ABL2     | 1.038844 | 4.417663 | 4.26E-05 |
| MRAS      | -1.0637  | -3.4576  | 0.00101  | SND1-IT1 | 1.039592 | 4.136153 | 0.000112 |
| ADRB1     | -1.06375 | -4.13631 | 0.000112 | MMP11    | 1.040384 | 3.672618 | 0.000514 |
| ADCY8     | -1.066   | -3.54896 | 0.00076  | HCK      | 1.041808 | 4.797619 | 1.11E-05 |
| ALPK3     | -1.07133 | -5.31583 | 1.66E-06 | ZNF250   | 1.042035 | 3.457846 | 0.001009 |
| TRIL      | -1.0726  | -4.07188 | 0.000139 | VAMP8    | 1.043284 | 4.084088 | 0.000133 |
| COX5A     | -1.07294 | -5.57448 | 6.27E-07 | NVL      | 1.043462 | 3.964528 | 0.000199 |
| GLUL      | -1.07424 | -5.12902 | 3.31E-06 | RNF24    | 1.044606 | 3.208224 | 0.002147 |
| DAAM2     | -1.07453 | -7.58518 | 2.54E-10 | PAWR     | 1.044675 | 5.101052 | 3.67E-06 |
| ATP6V1G2  | -1.07481 | -4.13267 | 0.000113 | MAPK6    | 1.044766 | 5.541141 | 7.11E-07 |
| GRIK2     | -1.07537 | -5.56502 | 6.50E-07 | TLR2     | 1.04628  | 4.468846 | 3.56E-05 |
| FUT6      | -1.07616 | -3.68417 | 0.000495 | DHCR24   | 1.046714 | 3.784179 | 0.000359 |
| SPRY1     | -1.07922 | -5.96332 | 1.43E-07 | SAT1     | 1.047536 | 6.113416 | 8.01E-08 |
| PARD6A    | -1.07926 | -4.99616 | 5.39E-06 | PPFIBP1  | 1.049629 | 2.59682  | 0.011824 |
| ALDH3A2   | -1.08118 | -6.27361 | 4.31E-08 | EPHA1    | 1.04984  | 2.685557 | 0.009356 |
| ACOT11    | -1.08698 | -5.50903 | 8.03E-07 | TSPAN9   | 1.050016 | 5.679058 | 4.22E-07 |
| NRXN1     | -1.08784 | -4.04859 | 0.00015  | RAN      | 1.051045 | 8.576494 | 5.23E-12 |
| C14orf132 | -1.0893  | -3.17333 | 0.00238  | GLRX3    | 1.051439 | 4.100911 | 0.000126 |
| NME5      | -1.09173 | -4.61508 | 2.13E-05 | EFNB2    | 1.051912 | 5.37668  | 1.32E-06 |
| COLGALT2  | -1.09353 | -6.79381 | 5.68E-09 | FAM50A   | 1.052439 | 3.099481 | 0.002953 |
| RASGRP3   | -1.09369 | -3.54338 | 0.000773 | BZW1     | 1.054012 | 7.265609 | 8.93E-10 |
| SFRP1     | -1.09975 | -2.50064 | 0.015154 | NCAPD2   | 1.054493 | 3.597982 | 0.000651 |
| SLC2A5    | -1.1015  | -3.1218  | 0.002768 | IRF7     | 1.055043 | 6.137843 | 7.29E-08 |
| ACADS     | -1.10205 | -6.59781 | 1.22E-08 | SOCS1    | 1.055589 | 4.380029 | 4.85E-05 |
| RHOBTB1   | -1.1021  | -2.25074 | 0.028089 | ADAM19   | 1.056963 | 5.111957 | 3.52E-06 |
| AGTPBP1   | -1.10249 | -3.93164 | 0.000222 | KIAA0754 | 1.057097 | 4.446578 | 3.85E-05 |
| ARHGEF6   | -1.10254 | -5.66218 | 4.50E-07 | SLC36A1  | 1.058665 | 5.891992 | 1.87E-07 |
| DMPK      | -1.10274 | -6.44719 | 2.20E-08 | SLC20A1  | 1.059856 | 6.432932 | 2.32E-08 |
| KCNQ3     | -1.10319 | -4.85993 | 8.84E-06 | CBX3     | 1.061    | 7.46182  | 4.13E-10 |
| HOXA4     | -1.10667 | -4.0067  | 0.000173 | SH2D2A   | 1.061058 | 4.372502 | 4.98E-05 |
| FXR1      | -1.10774 | -2.79711 | 0.006925 | VCAN     | 1.061381 | 3.324268 | 0.001517 |
| RERE      | -1.1097  | -8.5187  | 6.56E-12 | SORL1    | 1.061566 | 5.544821 | 7.02E-07 |
| SLC22A14  | -1.1101  | -4.52735 | 2.90E-05 | ITPA     | 1.0643   | 8.048452 | 4.13E-11 |
| KCNAB1    | -1.11121 | -5.96315 | 1.43E-07 | SLC25A16 | 1.064842 | 4.216692 | 8.51E-05 |

|         |          |          |          |          |          |          |          |
|---------|----------|----------|----------|----------|----------|----------|----------|
| FOXO4   | -1.11192 | -4.50065 | 3.18E-05 | TSTA3    | 1.066334 | 6.372806 | 2.93E-08 |
| NR2F2   | -1.11275 | -5.41332 | 1.15E-06 | CDKN1A   | 1.066541 | 4.491485 | 3.29E-05 |
| TACC2   | -1.11439 | -7.20709 | 1.12E-09 | HSD17B6  | 1.066576 | 3.569914 | 0.000712 |
| ATP2A2  | -1.11813 | -3.84959 | 0.00029  | HCG4     | 1.066685 | 3.335038 | 0.001469 |
| CCNG1   | -1.11826 | -4.44411 | 3.88E-05 | CST6     | 1.067447 | 3.673362 | 0.000513 |
| ELN     | -1.11893 | -5.1728  | 2.82E-06 | GPSM2    | 1.067611 | 3.605232 | 0.000637 |
| GJA4    | -1.11964 | -4.07222 | 0.000139 | TMX1     | 1.067914 | 7.108823 | 1.65E-09 |
| FOSB    | -1.12159 | -3.16342 | 0.00245  | B4GALT4  | 1.069555 | 3.087905 | 0.003054 |
| NR4A2   | -1.12437 | -2.41094 | 0.018999 | TFCP2    | 1.069797 | 4.184325 | 9.50E-05 |
| ARNT2   | -1.12752 | -5.03909 | 4.61E-06 | SAMHD1   | 1.070321 | 3.003434 | 0.003893 |
| SCCPDH  | -1.12774 | -4.32849 | 5.80E-05 | COL7A1   | 1.072039 | 5.616192 | 5.36E-07 |
| HSD11B2 | -1.13029 | -3.18941 | 0.00227  | SSR1     | 1.07217  | 6.735602 | 7.14E-09 |
| AP1S2   | -1.13169 | -5.0624  | 4.23E-06 | SPARC    | 1.074778 | 3.843901 | 0.000296 |
| S100A4  | -1.13232 | -6.91303 | 3.56E-09 | NCBP2    | 1.075208 | 6.84365  | 4.68E-09 |
| NTRK3   | -1.13294 | -7.67824 | 1.76E-10 | SLC22A4  | 1.075835 | 3.119831 | 0.002784 |
| SLIT2   | -1.13419 | -6.54213 | 1.52E-08 | SMC1A    | 1.07712  | 5.85381  | 2.17E-07 |
| CYP2B7P | -1.13625 | -4.25505 | 7.47E-05 | IFNGR1   | 1.07809  | 6.926395 | 3.38E-09 |
| GBAS    | -1.13653 | -3.62674 | 0.000595 | FOXF2    | 1.078704 | 2.660193 | 0.010009 |
| LIMCH1  | -1.13664 | -3.19027 | 0.002264 | VPS4B    | 1.078825 | 3.153662 | 0.002521 |
| LAMA2   | -1.13847 | -4.44166 | 3.91E-05 | FUBP3    | 1.079949 | 5.599738 | 5.70E-07 |
| LRIG1   | -1.13847 | -6.98416 | 2.70E-09 | RFC4     | 1.080178 | 7.617441 | 2.24E-10 |
| FGF7    | -1.13941 | -5.47093 | 9.27E-07 | CKS1B    | 1.082133 | 6.362531 | 3.05E-08 |
| USP2    | -1.14042 | -3.78526 | 0.000358 | ARL4C    | 1.083614 | 4.967277 | 5.99E-06 |
| CHAD    | -1.14162 | -5.3221  | 1.62E-06 | LILRB4   | 1.083708 | 4.199114 | 9.04E-05 |
| PCDH9   | -1.14262 | -5.89803 | 1.83E-07 | HSPB11   | 1.085628 | 6.360791 | 3.07E-08 |
| TMPRSS2 | -1.14344 | -4.15311 | 0.000106 | C9orf91  | 1.085988 | 3.459376 | 0.001004 |
| PCLO    | -1.14404 | -4.57781 | 2.43E-05 | MKI67    | 1.087923 | 4.716252 | 1.48E-05 |
| NTS     | -1.14463 | -2.91306 | 0.005025 | DYNLL1   | 1.088505 | 5.988657 | 1.29E-07 |
| ANGPT1  | -1.14479 | -6.44855 | 2.19E-08 | CFL1     | 1.088856 | 6.880096 | 4.05E-09 |
| MDH2    | -1.14639 | -4.88125 | 8.19E-06 | KLF7     | 1.091373 | 8.655526 | 3.85E-12 |
| SVEP1   | -1.14726 | -4.70236 | 1.56E-05 | DUSP11   | 1.092045 | 8.292117 | 1.59E-11 |
| NELL1   | -1.14817 | -2.71976 | 0.008538 | LUM      | 1.092208 | 3.036063 | 0.003546 |
| ALDH2   | -1.14909 | -5.82517 | 2.42E-07 | CD3D     | 1.092327 | 3.049941 | 0.003408 |
| ANKRD6  | -1.15072 | -4.08254 | 0.000134 | ARNTL    | 1.092532 | 3.258753 | 0.001847 |
| SLC7A2  | -1.15126 | -5.10371 | 3.63E-06 | GMFG     | 1.092734 | 2.832915 | 0.006277 |
| CTSF    | -1.15279 | -8.32597 | 1.39E-11 | CA12     | 1.092915 | 3.155685 | 0.002507 |
| NPR1    | -1.15297 | -4.78969 | 1.14E-05 | IRF1     | 1.093483 | 3.59656  | 0.000654 |
| ABCA6   | -1.15715 | -3.73227 | 0.000425 | IRF9     | 1.093836 | 6.725534 | 7.42E-09 |
| TFF3    | -1.15853 | -4.5953  | 2.28E-05 | PSMB2    | 1.094225 | 11.12853 | 3.32E-16 |
| DCX     | -1.15853 | -3.42279 | 0.001124 | TNFAIP8  | 1.094273 | 5.510356 | 7.99E-07 |
| AES     | -1.15888 | -7.56054 | 2.80E-10 | SLC25A13 | 1.095754 | 5.486462 | 8.74E-07 |
| CYP3A5  | -1.16162 | -5.58851 | 5.95E-07 | MYD88    | 1.098375 | 5.381007 | 1.30E-06 |
| ACADSB  | -1.16506 | -4.94451 | 6.51E-06 | FLNA     | 1.09983  | 5.280788 | 1.89E-06 |
| SOX30   | -1.16548 | -3.86987 | 0.000272 | TGIF1    | 1.100004 | 5.37697  | 1.32E-06 |
| KHDRBS3 | -1.166   | -4.72067 | 1.46E-05 | H2AFZ    | 1.102121 | 3.507279 | 0.000865 |
| VDAC3   | -1.16706 | -5.46911 | 9.33E-07 | NFKBIE   | 1.102285 | 4.868905 | 8.56E-06 |
| RBFADN  | -1.16959 | -5.03421 | 4.69E-06 | SEC16A   | 1.102298 | 3.248656 | 0.001904 |

|           |          |          |          |          |          |          |          |
|-----------|----------|----------|----------|----------|----------|----------|----------|
| ADAMTSL3  | -1.16966 | -5.10079 | 3.67E-06 | CBR1     | 1.102991 | 4.425133 | 4.15E-05 |
| SCNN1B    | -1.17233 | -3.41804 | 0.00114  | CD58     | 1.103634 | 6.553921 | 1.45E-08 |
| CORO2B    | -1.1729  | -4.68437 | 1.66E-05 | LMNB2    | 1.104594 | 6.862437 | 4.34E-09 |
| ECH1      | -1.17418 | -5.27419 | 1.93E-06 | EPHB3    | 1.105107 | 3.942953 | 0.000214 |
| EYA4      | -1.17489 | -3.28215 | 0.001722 | LPCAT4   | 1.105358 | 2.548109 | 0.013417 |
| RGP1      | -1.17505 | -5.33241 | 1.56E-06 | NKRF     | 1.1073   | 4.889898 | 7.93E-06 |
| UCP2      | -1.17775 | -5.18679 | 2.67E-06 | HMGA1    | 1.107571 | 4.029483 | 0.00016  |
| NOVA1     | -1.18039 | -6.21111 | 5.49E-08 | FST      | 1.108638 | 4.104405 | 0.000125 |
| SUCLG2    | -1.18214 | -4.03979 | 0.000155 | GPNMB    | 1.108662 | 4.086752 | 0.000132 |
| GPR64     | -1.1827  | -3.58056 | 0.000688 | PSMG1    | 1.109189 | 4.554497 | 2.63E-05 |
| ACSL1     | -1.18439 | -6.31172 | 3.72E-08 | PTPN12   | 1.1092   | 7.290462 | 8.10E-10 |
| CFH       | -1.1863  | -5.45327 | 9.90E-07 | AHR      | 1.109885 | 6.809716 | 5.34E-09 |
| CAPN6     | -1.18652 | -4.39304 | 4.64E-05 | NUDT21   | 1.110964 | 4.238619 | 7.90E-05 |
| GPM6A     | -1.18801 | -4.02937 | 0.00016  | FSTL3    | 1.11118  | 4.486772 | 3.34E-05 |
| EIF2AK2   | -1.18993 | -3.45414 | 0.00102  | LOX      | 1.113669 | 4.426462 | 4.13E-05 |
| RAB6B     | -1.19049 | -4.10475 | 0.000124 | FCGR2A   | 1.114408 | 4.975188 | 5.82E-06 |
| ZCCHC24   | -1.19373 | -4.0899  | 0.000131 | SC5D     | 1.115546 | 3.614691 | 0.000618 |
| PRUNE2    | -1.19657 | -3.13909 | 0.002631 | GTF2H4   | 1.115568 | 4.673635 | 1.73E-05 |
| BTG2      | -1.19692 | -4.00781 | 0.000172 | UGCG     | 1.1158   | 5.712584 | 3.72E-07 |
| DDO       | -1.19753 | -3.37839 | 0.001287 | PSPH     | 1.115991 | 2.645684 | 0.0104   |
| SLC1A6    | -1.19844 | -5.19844 | 2.56E-06 | LY96     | 1.116385 | 4.899104 | 7.67E-06 |
| ZNF132    | -1.20377 | -5.67903 | 4.22E-07 | MED1     | 1.116802 | 4.93033  | 6.85E-06 |
| EEF1A2    | -1.2043  | -6.85822 | 4.42E-09 | PIR      | 1.118471 | 2.611632 | 0.011375 |
| ZNRF4     | -1.20448 | -5.34015 | 1.51E-06 | PLK1     | 1.119614 | 5.926718 | 1.64E-07 |
| ATP5A1    | -1.20665 | -6.28142 | 4.18E-08 | OAS2     | 1.120588 | 5.736537 | 3.39E-07 |
| IDH2      | -1.20747 | -5.00174 | 5.28E-06 | SLBP     | 1.121263 | 4.173342 | 9.87E-05 |
| SYNE1     | -1.20884 | -6.40621 | 2.58E-08 | MVD      | 1.121282 | 3.793423 | 0.000349 |
| ATP12A    | -1.21356 | -4.01434 | 0.000169 | IRF6     | 1.121366 | 5.009191 | 5.14E-06 |
| ANK1      | -1.21548 | -5.20537 | 2.50E-06 | FANCI    | 1.121614 | 4.322941 | 5.91E-05 |
| PRKAA2    | -1.21755 | -3.96031 | 0.000202 | EPHB2    | 1.122598 | 7.536966 | 3.07E-10 |
| SSBP2     | -1.21874 | -4.41372 | 4.32E-05 | PRKAA1   | 1.123923 | 3.11945  | 0.002787 |
| APOOL     | -1.21875 | -4.07052 | 0.00014  | PRKDC    | 1.124808 | 7.745375 | 1.36E-10 |
| DOK5      | -1.21895 | -5.41586 | 1.14E-06 | ARPC5    | 1.126514 | 6.940795 | 3.20E-09 |
| GABARAPL  | -1.22174 | -6.0198  | 1.15E-07 | ADAM17   | 1.126542 | 5.222264 | 2.34E-06 |
| RP11-119F | -1.22256 | -4.28672 | 6.70E-05 | RASGRP1  | 1.128429 | 3.255192 | 0.001867 |
| KLK1      | -1.22762 | -2.48216 | 0.015883 | RRAS2    | 1.129717 | 5.066401 | 4.17E-06 |
| AR        | -1.2305  | -6.47388 | 1.98E-08 | NFYA     | 1.130189 | 5.731517 | 3.46E-07 |
| PLCL1     | -1.23234 | -4.57929 | 2.41E-05 | CAPZA1   | 1.13064  | 6.172171 | 6.38E-08 |
| ETFDH     | -1.2325  | -5.51213 | 7.94E-07 | PDCD6    | 1.131504 | 5.859558 | 2.12E-07 |
| GPT       | -1.23475 | -6.05641 | 9.97E-08 | RPE      | 1.132545 | 4.451796 | 3.78E-05 |
| SAMD4A    | -1.2368  | -3.73901 | 0.000416 | EIF3B    | 1.134931 | 5.195404 | 2.59E-06 |
| CYP27A1   | -1.23755 | -5.33106 | 1.56E-06 | RAP1GDS1 | 1.138772 | 7.510607 | 3.41E-10 |
| CYP2A13   | -1.23798 | -6.7043  | 8.06E-09 | GPR1     | 1.140431 | 3.914867 | 0.000234 |
| HADHB     | -1.23862 | -8.64843 | 3.96E-12 | APP      | 1.142166 | 6.013095 | 1.18E-07 |
| PAIP2B    | -1.23923 | -4.06976 | 0.00014  | TRAF3    | 1.142456 | 5.122104 | 3.39E-06 |
| SOD3      | -1.23978 | -6.6818  | 8.81E-09 | EVI2B    | 1.143455 | 2.03491  | 0.046298 |
| FRY       | -1.24052 | -7.41243 | 5.02E-10 | PSMD14   | 1.145159 | 4.302961 | 6.33E-05 |

|          |          |          |          |           |          |          |          |
|----------|----------|----------|----------|-----------|----------|----------|----------|
| PRKCQ    | -1.24447 | -3.25091 | 0.001891 | SLC25A17  | 1.145834 | 4.279506 | 6.86E-05 |
| MAN2A2   | -1.25079 | -7.92509 | 6.69E-11 | EIF4A3    | 1.148771 | 8.121542 | 3.10E-11 |
| GSN      | -1.25333 | -6.30318 | 3.84E-08 | S100A12   | 1.149211 | 4.074302 | 0.000138 |
| SPRY2    | -1.2547  | -5.53045 | 7.41E-07 | WDR46     | 1.150306 | 4.843484 | 9.38E-06 |
| DYRK1B   | -1.25819 | -4.09062 | 0.000131 | NUP160    | 1.15048  | 5.097036 | 3.72E-06 |
| NOL4     | -1.26    | -4.8002  | 1.10E-05 | SRD5A1    | 1.151799 | 5.97965  | 1.34E-07 |
| ZBTB18   | -1.26139 | -4.73178 | 1.40E-05 | E2F3      | 1.152233 | 5.817742 | 2.49E-07 |
| NEURL1   | -1.26266 | -7.49395 | 3.64E-10 | TUBA1B    | 1.153467 | 7.150669 | 1.40E-09 |
| SGCB     | -1.26449 | -2.97955 | 0.004167 | RDH11     | 1.154354 | 4.966076 | 6.01E-06 |
| MYRIP    | -1.2645  | -4.46911 | 3.56E-05 | RALA      | 1.156611 | 5.635077 | 4.99E-07 |
| ADIRF    | -1.26702 | -3.76592 | 0.000381 | RIN1      | 1.157628 | 5.546298 | 6.98E-07 |
| MGP      | -1.26745 | -6.07013 | 9.46E-08 | S100A8    | 1.158636 | 2.335903 | 0.022866 |
| HBD      | -1.26985 | -5.69624 | 3.95E-07 | HSPA5     | 1.159824 | 7.039121 | 2.17E-09 |
| LMO7     | -1.27372 | -3.57991 | 0.00069  | GNB5      | 1.160248 | 6.01001  | 1.19E-07 |
| HLF      | -1.27736 | -7.75128 | 1.32E-10 | INPP4B    | 1.160295 | 3.006389 | 0.00386  |
| CLGN     | -1.27742 | -3.76485 | 0.000382 | PKP3      | 1.160656 | 4.357919 | 5.24E-05 |
| CLCN4    | -1.27922 | -4.89335 | 7.83E-06 | DDX39A    | 1.16165  | 5.990279 | 1.29E-07 |
| SLC25A20 | -1.27975 | -5.24885 | 2.12E-06 | DDX10     | 1.162461 | 5.724001 | 3.56E-07 |
| CLDN3    | -1.28373 | -3.39983 | 0.001206 | AIM1      | 1.166894 | 2.78238  | 0.007209 |
| PCP4     | -1.28506 | -4.21481 | 8.57E-05 | SIAH2     | 1.167265 | 5.415682 | 1.14E-06 |
| LGI1     | -1.28923 | -4.96346 | 6.07E-06 | TFAP2C    | 1.167399 | 3.462078 | 0.000996 |
| C16orf45 | -1.28952 | -6.72624 | 7.40E-09 | SMURF2    | 1.174541 | 6.805236 | 5.43E-09 |
| GPR68    | -1.29128 | -6.02755 | 1.11E-07 | RHOH      | 1.174941 | 2.867116 | 0.005711 |
| PCNT     | -1.29527 | -4.16553 | 0.000101 | WNT5A     | 1.175103 | 5.031057 | 4.74E-06 |
| OLFML1   | -1.29527 | -5.24053 | 2.19E-06 | RCOR1     | 1.17638  | 4.777079 | 1.19E-05 |
| SEMA6C   | -1.29904 | -4.33447 | 5.68E-05 | ISG20     | 1.17647  | 4.417906 | 4.25E-05 |
| CKM      | -1.30629 | -4.72523 | 1.44E-05 | ZNF165    | 1.177756 | 3.150255 | 0.002547 |
| UBL3     | -1.30832 | -6.08709 | 8.86E-08 | ZNF365    | 1.179999 | 2.967752 | 0.004308 |
| PRH1     | -1.30995 | -2.74363 | 0.008007 | HIST1H2BN | 1.180466 | 5.699881 | 3.90E-07 |
| PPARG    | -1.31144 | -4.12652 | 0.000116 | FADD      | 1.183713 | 7.502753 | 3.52E-10 |
| CPEB3    | -1.3135  | -7.26225 | 9.05E-10 | NOC2L     | 1.183923 | 4.03024  | 0.00016  |
| LMO3     | -1.31369 | -3.87066 | 0.000271 | NOP2      | 1.183981 | 4.650991 | 1.87E-05 |
| MYL9     | -1.31775 | -3.1265  | 0.00273  | PWP1      | 1.1853   | 6.743169 | 6.93E-09 |
| ACO2     | -1.32024 | -4.00109 | 0.000176 | COPB2     | 1.189816 | 6.65588  | 9.74E-09 |
| LIFR     | -1.32061 | -3.89986 | 0.000246 | AJAP1     | 1.191934 | 3.222993 | 0.002055 |
| PRELP    | -1.32097 | -7.75075 | 1.33E-10 | MCM4      | 1.19443  | 5.834542 | 2.34E-07 |
| GADD45G  | -1.32253 | -4.48427 | 3.37E-05 | NPM3      | 1.196394 | 6.629469 | 1.08E-08 |
| PRPH2    | -1.32364 | -3.94294 | 0.000214 | APOC1     | 1.197643 | 2.975301 | 0.004217 |
| ST18     | -1.3248  | -3.71711 | 0.000446 | MAML3     | 1.19817  | 4.449395 | 3.81E-05 |
| ANG      | -1.32914 | -3.94608 | 0.000211 | SNRPB     | 1.198307 | 9.876171 | 3.52E-14 |
| CRYM     | -1.33019 | -4.59823 | 2.26E-05 | ITGB2     | 1.200108 | 3.006321 | 0.003861 |
| MTUS1    | -1.3316  | -6.60495 | 1.19E-08 | CDH11     | 1.200471 | 4.54336  | 2.74E-05 |
| EPM2A    | -1.33262 | -4.89431 | 7.81E-06 | SPAG1     | 1.201683 | 4.674677 | 1.72E-05 |
| PLA2G4C  | -1.3328  | -6.39116 | 2.73E-08 | CDKN2B    | 1.202436 | 4.117395 | 0.000119 |
| ITM2A    | -1.3339  | -5.46347 | 9.53E-07 | CTNBP1    | 1.204289 | 3.602502 | 0.000642 |
| TFF1     | -1.33685 | -3.27832 | 0.001742 | DST       | 1.204595 | 5.454445 | 9.86E-07 |
| CRISP2   | -1.33789 | -3.25411 | 0.001873 | KIN       | 1.205058 | 3.805697 | 0.000335 |

|           |          |          |          |          |          |          |          |
|-----------|----------|----------|----------|----------|----------|----------|----------|
| HMGCS2    | -1.3384  | -6.43078 | 2.34E-08 | PRDM1    | 1.205198 | 3.687194 | 0.000491 |
| PPM1E     | -1.34556 | -4.5585  | 2.60E-05 | CRABP2   | 1.205318 | 4.076369 | 0.000137 |
| TCN1      | -1.35073 | -2.08728 | 0.04113  | EIF4EBP1 | 1.205895 | 4.329489 | 5.78E-05 |
| NR3C2     | -1.3518  | -7.67186 | 1.81E-10 | NME1     | 1.2063   | 7.801623 | 1.09E-10 |
| TAC1      | -1.35387 | -3.56616 | 0.00072  | SLC39A7  | 1.209727 | 3.819479 | 0.00032  |
| NOVA2     | -1.35466 | -5.67229 | 4.33E-07 | BAZ1A    | 1.209834 | 7.922762 | 6.75E-11 |
| EYA2      | -1.35498 | -3.9663  | 0.000198 | APRT     | 1.213615 | 5.533896 | 7.31E-07 |
| PLA2G2A   | -1.35692 | -2.93016 | 0.00479  | FSTL1    | 1.213959 | 3.591401 | 0.000665 |
| BEX4      | -1.36225 | -4.76013 | 1.27E-05 | GZMK     | 1.215337 | 2.422517 | 0.018458 |
| CX3CR1    | -1.36679 | -5.04444 | 4.52E-06 | ARHGDI1  | 1.215404 | 5.378126 | 1.31E-06 |
| GHR       | -1.3671  | -6.24121 | 4.89E-08 | PLOD2    | 1.216523 | 4.742255 | 1.35E-05 |
| COBL      | -1.37664 | -3.49382 | 0.000902 | PAICS    | 1.217765 | 6.746168 | 6.85E-09 |
| PIP5K1B   | -1.37729 | -4.19313 | 9.22E-05 | ZNF593   | 1.220219 | 4.584389 | 2.37E-05 |
| SRPK3     | -1.37779 | -6.83667 | 4.81E-09 | STIL     | 1.220476 | 5.236362 | 2.23E-06 |
| SORBS1    | -1.38078 | -3.58422 | 0.00068  | CDC40    | 1.221192 | 4.242877 | 7.78E-05 |
| HSPB3     | -1.38319 | -3.71468 | 0.000449 | PPIB     | 1.224516 | 6.325255 | 3.53E-08 |
| PITX2     | -1.38869 | -3.33164 | 0.001484 | SERPINH1 | 1.22519  | 6.452697 | 2.15E-08 |
| ACAA2     | -1.39301 | -4.80571 | 1.08E-05 | SLC39A6  | 1.225664 | 6.508952 | 1.73E-08 |
| NF2       | -1.39376 | -4.14114 | 0.00011  | DNAJC9   | 1.225848 | 7.747245 | 1.35E-10 |
| MPPED2    | -1.40035 | -3.73838 | 0.000416 | CCL5     | 1.226821 | 4.582703 | 2.38E-05 |
| SATB1     | -1.40043 | -6.04404 | 1.05E-07 | NFE2L3   | 1.227575 | 3.533094 | 0.000799 |
| FBLN5     | -1.40171 | -6.5574  | 1.43E-08 | HDAC9    | 1.227656 | 2.76128  | 0.007634 |
| TTC9      | -1.40255 | -3.79547 | 0.000346 | ADAM10   | 1.229257 | 8.649316 | 3.94E-12 |
| CCDC69    | -1.40291 | -7.13119 | 1.51E-09 | MAD2L1   | 1.230087 | 5.058927 | 4.28E-06 |
| SSPN      | -1.40648 | -6.13829 | 7.27E-08 | ESM1     | 1.231109 | 3.027331 | 0.003636 |
| BAGE      | -1.41129 | -3.77215 | 0.000373 | SEL1L3   | 1.231638 | 2.870846 | 0.005653 |
| GPX3      | -1.41727 | -4.22968 | 8.14E-05 | RNF126   | 1.232527 | 4.317189 | 6.03E-05 |
| SLITRK5   | -1.41782 | -4.40286 | 4.48E-05 | MBOAT7   | 1.23721  | 5.778977 | 2.89E-07 |
| DCLK1     | -1.41787 | -5.59627 | 5.78E-07 | CCNC     | 1.238209 | 4.934657 | 6.74E-06 |
| FAM149A   | -1.42101 | -4.2204  | 8.41E-05 | KDM5B    | 1.239871 | 5.587974 | 5.96E-07 |
| CLTCL1    | -1.42471 | -4.22123 | 8.38E-05 | MDK      | 1.241648 | 3.968992 | 0.000196 |
| PDE4D     | -1.42873 | -5.10086 | 3.67E-06 | RNASE6   | 1.241721 | 4.334535 | 5.68E-05 |
| BZRAP1    | -1.43006 | -6.26393 | 4.48E-08 | ARHGEF5  | 1.241883 | 4.472968 | 3.51E-05 |
| GDF10     | -1.43368 | -4.73912 | 1.37E-05 | TPGS2    | 1.241895 | 5.207813 | 2.47E-06 |
| TENC1     | -1.43597 | -4.35828 | 5.23E-05 | MLLT11   | 1.243541 | 2.615336 | 0.011265 |
| PGM1      | -1.43874 | -4.68074 | 1.68E-05 | STX5     | 1.244915 | 4.512283 | 3.06E-05 |
| NFIB      | -1.43951 | -9.29292 | 3.27E-13 | MAPRE1   | 1.244963 | 5.18193  | 2.72E-06 |
| GYPC      | -1.44665 | -7.32141 | 7.17E-10 | LCP1     | 1.247511 | 3.471129 | 0.000968 |
| PARK2     | -1.44737 | -4.86433 | 8.70E-06 | CD151    | 1.248884 | 3.684053 | 0.000496 |
| ZNF135    | -1.45572 | -4.31656 | 6.04E-05 | EXT1     | 1.250987 | 8.427481 | 9.36E-12 |
| SMIM8     | -1.4597  | -5.20624 | 2.49E-06 | BCL10    | 1.253275 | 5.25582  | 2.07E-06 |
| ACOX2     | -1.46091 | -4.75558 | 1.29E-05 | IFITM1   | 1.255582 | 5.781338 | 2.86E-07 |
| GRIA2     | -1.46703 | -4.11225 | 0.000121 | SEC24D   | 1.25818  | 4.274605 | 6.98E-05 |
| UCP3      | -1.46775 | -4.52159 | 2.96E-05 | UBE2H    | 1.258269 | 3.666628 | 0.000524 |
| TSPAN7    | -1.46816 | -3.12168 | 0.002769 | AQP3     | 1.259592 | 2.315511 | 0.024031 |
| TOX3      | -1.47282 | -4.11088 | 0.000122 | CSTA     | 1.259859 | 2.167199 | 0.034211 |
| RP11-429B | -1.47559 | -5.58438 | 6.04E-07 | YWHAQ    | 1.259929 | 8.447713 | 8.65E-12 |

|          |          |          |          |          |          |          |          |
|----------|----------|----------|----------|----------|----------|----------|----------|
| PTGIS    | -1.47708 | -4.43111 | 4.06E-05 | CA2      | 1.260271 | 3.260632 | 0.001837 |
| PBX1     | -1.48023 | -9.14283 | 5.82E-13 | ASPH     | 1.263201 | 4.913344 | 7.29E-06 |
| PWAR5    | -1.48311 | -3.51966 | 0.000833 | SEL1L    | 1.265764 | 3.847924 | 0.000292 |
| KLF9     | -1.48411 | -7.37489 | 5.81E-10 | PDCD11   | 1.267922 | 6.146863 | 7.04E-08 |
| ZBTB20   | -1.48453 | -6.34554 | 3.26E-08 | ZNF185   | 1.269018 | 2.641079 | 0.010527 |
| ATP8A1   | -1.48528 | -5.26467 | 2.00E-06 | DNAJC3   | 1.26992  | 3.59303  | 0.000662 |
| CDO1     | -1.48948 | -4.05022 | 0.000149 | CDK1     | 1.27001  | 6.917079 | 3.51E-09 |
| FAM134B  | -1.48977 | -3.60029 | 0.000647 | MTSS1    | 1.270449 | 7.288329 | 8.17E-10 |
| PTH2R    | -1.49115 | -4.38175 | 4.82E-05 | MALT1    | 1.27119  | 5.453671 | 9.89E-07 |
| MEF2C    | -1.50394 | -4.71388 | 1.50E-05 | KLK10    | 1.271233 | 2.452242 | 0.017132 |
| CDH19    | -1.50515 | -5.72106 | 3.60E-07 | RAB29    | 1.272669 | 5.689342 | 4.06E-07 |
| PTN      | -1.51726 | -4.93527 | 6.73E-06 | RPN1     | 1.273103 | 6.903141 | 3.70E-09 |
| PEG3     | -1.51883 | -4.09794 | 0.000127 | LYN      | 1.273344 | 5.430576 | 1.08E-06 |
| DNAH7    | -1.52271 | -4.05269 | 0.000148 | COL16A1  | 1.273348 | 5.582727 | 6.08E-07 |
| GPRC5B   | -1.52628 | -6.57662 | 1.33E-08 | LGALS3BP | 1.273514 | 4.451063 | 3.79E-05 |
| DTNA     | -1.5269  | -7.64244 | 2.03E-10 | SF3B4    | 1.273519 | 5.911629 | 1.74E-07 |
| SLC29A2  | -1.53081 | -7.24128 | 9.83E-10 | PNO1     | 1.274645 | 4.898263 | 7.70E-06 |
| FRZB     | -1.53267 | -3.99647 | 0.000179 | PTPLB    | 1.274699 | 6.241262 | 4.89E-08 |
| SLIT3    | -1.53332 | -5.41392 | 1.15E-06 | APEX2    | 1.274812 | 7.020212 | 2.34E-09 |
| HADH     | -1.53497 | -7.90523 | 7.24E-11 | DUSP6    | 1.275256 | 5.514334 | 7.87E-07 |
| KRT76    | -1.53624 | -3.69189 | 0.000483 | IL17RA   | 1.276581 | 5.957905 | 1.46E-07 |
| KAT2B    | -1.53718 | -4.90592 | 7.49E-06 | POP1     | 1.27731  | 4.939329 | 6.63E-06 |
| NR4A1    | -1.54593 | -4.47401 | 3.50E-05 | VDR      | 1.277359 | 6.649624 | 9.98E-09 |
| ACTN3    | -1.54626 | -3.041   | 0.003496 | SMC4     | 1.278577 | 5.963263 | 1.43E-07 |
| RGN      | -1.54861 | -5.34388 | 1.49E-06 | PPARD    | 1.27978  | 4.979789 | 5.72E-06 |
| MYH6     | -1.54959 | -4.52317 | 2.94E-05 | LAMB1    | 1.280559 | 5.270823 | 1.96E-06 |
| GPRASP1  | -1.5504  | -6.14509 | 7.09E-08 | RECQL    | 1.281358 | 6.55455  | 1.45E-08 |
| PLCL2    | -1.55365 | -6.37291 | 2.93E-08 | APOE     | 1.283211 | 2.816897 | 0.00656  |
| ACTA2    | -1.55544 | -4.79021 | 1.14E-05 | CXCR6    | 1.284038 | 4.621081 | 2.08E-05 |
| DMBT1    | -1.55957 | -3.46093 | 0.000999 | IL1B     | 1.284672 | 5.325894 | 1.59E-06 |
| MEG3     | -1.56504 | -5.31355 | 1.67E-06 | PLP2     | 1.284674 | 6.457379 | 2.11E-08 |
| NNT      | -1.56822 | -7.58226 | 2.57E-10 | PPAT     | 1.284935 | 4.911402 | 7.34E-06 |
| GPC4     | -1.5699  | -3.83975 | 0.0003   | SHC1     | 1.285897 | 8.013353 | 4.73E-11 |
| PHYHIP   | -1.57528 | -6.22541 | 5.20E-08 | GJB5     | 1.28709  | 5.486784 | 8.73E-07 |
| TSPYL5   | -1.57998 | -6.99694 | 2.56E-09 | ZYX      | 1.288251 | 4.707604 | 1.53E-05 |
| AGT      | -1.58682 | -4.21673 | 8.51E-05 | SH3BP2   | 1.291899 | 5.29217  | 1.81E-06 |
| ALDH5A1  | -1.59148 | -3.83803 | 0.000301 | NRAS     | 1.292546 | 4.525974 | 2.91E-05 |
| TF       | -1.59254 | -3.31909 | 0.001541 | DDX21    | 1.293229 | 6.593391 | 1.24E-08 |
| GMPR     | -1.60036 | -7.35621 | 6.26E-10 | PTPRE    | 1.294402 | 7.991844 | 5.15E-11 |
| MITF     | -1.6029  | -6.82839 | 4.96E-09 | CD47     | 1.29527  | 5.240717 | 2.19E-06 |
| FAM189A2 | -1.60618 | -9.65406 | 8.19E-14 | GNAI3    | 1.296636 | 4.884849 | 8.08E-06 |
| CXCL12   | -1.61174 | -5.82991 | 2.38E-07 | SOX4     | 1.297001 | 4.806938 | 1.07E-05 |
| SEC14L5  | -1.61334 | -5.88892 | 1.90E-07 | TAGLN2   | 1.297381 | 9.068868 | 7.75E-13 |
| SVIL     | -1.6154  | -5.82493 | 2.42E-07 | LRRC42   | 1.299268 | 3.726781 | 0.000432 |
| MAPRE2   | -1.61631 | -6.49803 | 1.80E-08 | PDLIM4   | 1.299825 | 4.387473 | 4.73E-05 |
| MEOX2    | -1.61641 | -7.71883 | 1.50E-10 | PKP1     | 1.300889 | 5.209476 | 2.46E-06 |
| SIX1     | -1.61695 | -4.40233 | 4.49E-05 | SKAP2    | 1.302504 | 5.430486 | 1.08E-06 |



|          |          |          |          |           |          |          |          |
|----------|----------|----------|----------|-----------|----------|----------|----------|
| PTGDS    | -1.61902 | -5.77655 | 2.91E-07 | UBE2K     | 1.30255  | 3.204313 | 0.002172 |
| GOT1     | -1.62429 | -9.35074 | 2.62E-13 | FCGR3A    | 1.303631 | 4.621195 | 2.08E-05 |
| SERPINI1 | -1.62704 | -5.9615  | 1.44E-07 | HLA-J     | 1.307659 | 6.997019 | 2.56E-09 |
| PCK1     | -1.62756 | -3.66538 | 0.000526 | NCF2      | 1.311768 | 5.016249 | 5.01E-06 |
| ME3      | -1.62931 | -5.40637 | 1.18E-06 | ACTR3     | 1.31261  | 8.476684 | 7.73E-12 |
| KIAA0368 | -1.63245 | -6.00623 | 1.21E-07 | TXNDC9    | 1.313319 | 5.15788  | 2.98E-06 |
| GULP1    | -1.63429 | -4.72818 | 1.42E-05 | PROCR     | 1.31736  | 5.76999  | 2.99E-07 |
| HSPB2    | -1.63646 | -7.22038 | 1.07E-09 | ACKR3     | 1.318453 | 4.164418 | 0.000102 |
| SCN4A    | -1.63723 | -8.20789 | 2.21E-11 | SLC6A15   | 1.318962 | 3.255256 | 0.001867 |
| KIF5C    | -1.64171 | -6.56906 | 1.37E-08 | UBE2S     | 1.321725 | 7.987286 | 5.24E-11 |
| RBP4     | -1.6511  | -3.94018 | 0.000216 | ZWINT     | 1.322598 | 5.952874 | 1.48E-07 |
| GATM     | -1.65132 | -6.92089 | 3.45E-09 | GATC      | 1.326435 | 5.757362 | 3.13E-07 |
| SLC16A4  | -1.65272 | -4.04969 | 0.00015  | CCDC86    | 1.32681  | 4.549896 | 2.68E-05 |
| CBX7     | -1.65319 | -8.19604 | 2.31E-11 | TUBB3     | 1.328843 | 7.790476 | 1.14E-10 |
| SLC2A4   | -1.65488 | -5.59773 | 5.74E-07 | SNAPC1    | 1.331441 | 5.704516 | 3.83E-07 |
| LPIN1    | -1.66571 | -6.64287 | 1.03E-08 | ZNF217    | 1.331654 | 4.652882 | 1.86E-05 |
| AURKC    | -1.67562 | -6.43063 | 2.34E-08 | RP2       | 1.331708 | 7.032009 | 2.23E-09 |
| SPARCL1  | -1.68233 | -6.22014 | 5.30E-08 | HIST1H2BD | 1.332357 | 4.759734 | 1.27E-05 |
| PDE8B    | -1.68774 | -5.56602 | 6.48E-07 | LTBP1     | 1.332691 | 6.297338 | 3.93E-08 |
| SERPINA5 | -1.69104 | -4.66786 | 1.76E-05 | RAB32     | 1.332846 | 6.34832  | 3.23E-08 |
| LMOD1    | -1.6926  | -6.64464 | 1.02E-08 | LIPA      | 1.33348  | 5.481291 | 8.91E-07 |
| MAL      | -1.69401 | -2.7432  | 0.008016 | SEC61G    | 1.334483 | 5.492143 | 8.56E-07 |
| CDKN1C   | -1.70602 | -7.88519 | 7.83E-11 | GLIPR1    | 1.337831 | 4.294908 | 6.51E-05 |
| ACADL    | -1.70937 | -4.9392  | 6.63E-06 | DPY19L1   | 1.338245 | 6.135918 | 7.34E-08 |
| AGL      | -1.71136 | -6.21128 | 5.49E-08 | ZBED4     | 1.339155 | 4.788336 | 1.14E-05 |
| AGR2     | -1.71154 | -2.9918  | 0.004024 | PGAM1     | 1.340725 | 7.78577  | 1.16E-10 |
| DPT      | -1.73373 | -7.57978 | 2.60E-10 | PLK2      | 1.343219 | 7.523244 | 3.24E-10 |
| SNTA1    | -1.73501 | -5.91124 | 1.74E-07 | GSTP1     | 1.343552 | 8.274755 | 1.70E-11 |
| CACNG1   | -1.73672 | -4.19772 | 9.08E-05 | YAP1      | 1.344799 | 4.834482 | 9.70E-06 |
| SH2B2    | -1.73875 | -5.06562 | 4.18E-06 | CCT5      | 1.346313 | 8.711471 | 3.10E-12 |
| MYL6B    | -1.75216 | -5.12757 | 3.33E-06 | IL4R      | 1.346368 | 5.735426 | 3.41E-07 |
| MBP      | -1.75722 | -5.32817 | 1.58E-06 | FAT1      | 1.347407 | 4.723291 | 1.45E-05 |
| MUC5B    | -1.75775 | -3.90731 | 0.00024  | ID1       | 1.348332 | 5.530998 | 7.39E-07 |
| TJP3     | -1.7587  | -6.00215 | 1.23E-07 | SRPX2     | 1.349332 | 4.85956  | 8.85E-06 |
| AQP4     | -1.76798 | -4.25729 | 7.41E-05 | DLX5      | 1.351552 | 4.829748 | 9.86E-06 |
| SORBS2   | -1.77794 | -6.37178 | 2.95E-08 | KNTC1     | 1.353336 | 3.625717 | 0.000597 |
| MSTN     | -1.78471 | -3.54749 | 0.000763 | HMGA2     | 1.35587  | 4.682714 | 1.67E-05 |
| TIMP4    | -1.78661 | -4.31917 | 5.99E-05 | ACLY      | 1.35875  | 9.151532 | 5.63E-13 |
| FMO2     | -1.79501 | -4.85094 | 9.14E-06 | OSMR      | 1.358797 | 7.043567 | 2.14E-09 |
| CNN1     | -1.79614 | -5.31334 | 1.67E-06 | TGFA      | 1.361149 | 6.736465 | 7.11E-09 |
| CRAT     | -1.79664 | -11.413  | 1.18E-16 | SLC7A8    | 1.362671 | 5.434229 | 1.06E-06 |
| SYNGR1   | -1.7997  | -8.54389 | 5.94E-12 | CENPE     | 1.364594 | 4.079162 | 0.000136 |
| ACADM    | -1.80902 | -7.5608  | 2.80E-10 | FEN1      | 1.364917 | 7.521931 | 3.26E-10 |
| CACNB1   | -1.82114 | -6.98602 | 2.68E-09 | TPBG      | 1.367475 | 6.371779 | 2.95E-08 |
| CLU      | -1.83383 | -4.44164 | 3.91E-05 | FYB       | 1.368447 | 3.944335 | 0.000213 |
| PDZRN3   | -1.83566 | -5.39022 | 1.25E-06 | TOP2A     | 1.370217 | 7.364912 | 6.05E-10 |
| PPP1R12B | -1.84183 | -8.61998 | 4.42E-12 | BBOX1     | 1.370638 | 3.097478 | 0.002971 |

|          |          |          |          |          |          |          |          |
|----------|----------|----------|----------|----------|----------|----------|----------|
| TGFBR3   | -1.86553 | -5.81703 | 2.50E-07 | SQLE     | 1.371157 | 6.169235 | 6.45E-08 |
| GRB14    | -1.86739 | -4.64975 | 1.88E-05 | CORO2A   | 1.372281 | 4.259617 | 7.35E-05 |
| CAPN3    | -1.86966 | -5.40184 | 1.20E-06 | FOXMI    | 1.373369 | 7.521556 | 3.27E-10 |
| CAV3     | -1.8782  | -6.60335 | 1.20E-08 | LYPD3    | 1.373535 | 3.41688  | 0.001144 |
| AK055981 | -1.8783  | -8.41344 | 9.89E-12 | UMPS     | 1.375409 | 6.952038 | 3.06E-09 |
| FABP7    | -1.8783  | -7.70013 | 1.62E-10 | NOP16    | 1.375832 | 4.847773 | 9.24E-06 |
| EPHX2    | -1.88348 | -5.6895  | 4.06E-07 | SLC7A7   | 1.377463 | 4.815702 | 1.04E-05 |
| PFKFB1   | -1.89706 | -5.40415 | 1.19E-06 | BIK      | 1.377547 | 4.312293 | 6.13E-05 |
| ZNF423   | -1.90138 | -4.45248 | 3.77E-05 | EGFR     | 1.379016 | 4.351956 | 5.35E-05 |
| PLP1     | -1.91383 | -7.77441 | 1.21E-10 | CDH1     | 1.3802   | 4.20029  | 9.00E-05 |
| PLIN1    | -1.91739 | -4.89652 | 7.75E-06 | PPP1R8   | 1.380718 | 5.311994 | 1.68E-06 |
| ITGA7    | -1.92383 | -5.09478 | 3.75E-06 | MARCKS   | 1.381501 | 8.988371 | 1.06E-12 |
| BIN1     | -1.93027 | -5.68235 | 4.17E-07 | CLIC1    | 1.383442 | 6.787334 | 5.83E-09 |
| RTN2     | -1.93067 | -6.96622 | 2.89E-09 | RIT1     | 1.385225 | 6.361512 | 3.07E-08 |
| GPC3     | -1.95238 | -5.9931  | 1.27E-07 | CXCL8    | 1.386636 | 3.544008 | 0.000772 |
| SCN1B    | -1.95261 | -6.64623 | 1.01E-08 | RIN2     | 1.389538 | 8.225725 | 2.06E-11 |
| GOS2     | -1.95411 | -3.75034 | 0.000401 | HLA-DQB1 | 1.392405 | 2.676674 | 0.00958  |
| TMEM47   | -1.96217 | -7.90384 | 7.28E-11 | PRMT3    | 1.393742 | 4.530367 | 2.87E-05 |
| PHKG1    | -1.96756 | -7.07472 | 1.89E-09 | PDXK     | 1.3947   | 4.638786 | 1.95E-05 |
| TXNIP    | -1.98728 | -7.93145 | 6.53E-11 | KIF2A    | 1.395338 | 6.940305 | 3.20E-09 |
| ERBB4    | -1.99254 | -6.30045 | 3.88E-08 | PRSS3    | 1.395573 | 2.129223 | 0.03736  |
| CLDN5    | -1.99651 | -7.0331  | 2.23E-09 | MSMO1    | 1.396412 | 5.847831 | 2.22E-07 |
| ALDH6A1  | -2.00593 | -6.00596 | 1.21E-07 | TSR1     | 1.40142  | 4.485981 | 3.35E-05 |
| TLE2     | -2.01724 | -9.33752 | 2.75E-13 | TRIM22   | 1.406483 | 4.433264 | 4.03E-05 |
| AOC3     | -2.02983 | -6.26424 | 4.47E-08 | GMPS     | 1.407921 | 7.019277 | 2.35E-09 |
| MAOB     | -2.04032 | -8.70406 | 3.19E-12 | HMGB3    | 1.408416 | 4.409152 | 4.38E-05 |
| ESRRG    | -2.05718 | -5.32535 | 1.60E-06 | ACTL6A   | 1.412102 | 7.632147 | 2.12E-10 |
| CAP2     | -2.06488 | -5.06076 | 4.25E-06 | EXT2     | 1.413453 | 6.088297 | 8.82E-08 |
| DMD      | -2.06732 | -8.59556 | 4.86E-12 | PLS3     | 1.413512 | 6.963711 | 2.92E-09 |
| KRT19    | -2.07375 | -2.63379 | 0.010732 | TXN      | 1.416961 | 4.768323 | 1.23E-05 |
| TNNT1    | -2.07778 | -5.27828 | 1.90E-06 | FZD6     | 1.419039 | 6.938884 | 3.22E-09 |
| KRT4     | -2.07896 | -3.66291 | 0.00053  | N4BP1    | 1.423339 | 6.745584 | 6.86E-09 |
| HRC      | -2.07992 | -4.72268 | 1.45E-05 | MAD1L1   | 1.426771 | 5.631603 | 5.05E-07 |
| ENPP4    | -2.09461 | -7.04042 | 2.16E-09 | HMMR     | 1.43088  | 5.057648 | 4.30E-06 |
| LPL      | -2.09801 | -7.00697 | 2.47E-09 | ITPR3    | 1.430895 | 6.972913 | 2.82E-09 |
| PDGFRL   | -2.10317 | -6.17932 | 6.21E-08 | UBE2L6   | 1.432103 | 7.709024 | 1.56E-10 |
| METTL7A  | -2.10443 | -6.873   | 4.17E-09 | NXT2     | 1.433101 | 5.048118 | 4.46E-06 |
| RCAN2    | -2.11923 | -8.28288 | 1.65E-11 | RGS19    | 1.433891 | 5.529933 | 7.42E-07 |
| SMARCD3  | -2.13166 | -5.60829 | 5.52E-07 | CAP1     | 1.433902 | 8.661874 | 3.75E-12 |
| GLRB     | -2.13663 | -6.98994 | 2.64E-09 | TRIP13   | 1.43536  | 8.244543 | 1.91E-11 |
| GPD1L    | -2.13926 | -11.0276 | 4.80E-16 | PSMB9    | 1.436486 | 6.003703 | 1.22E-07 |
| CFD      | -2.15828 | -9.10566 | 6.72E-13 | S100P    | 1.4366   | 2.989247 | 0.004054 |
| PRR4     | -2.1589  | -3.28111 | 0.001728 | DSG1     | 1.438103 | 3.233223 | 0.001993 |
| PFKM     | -2.17444 | -7.02244 | 2.32E-09 | PAIP1    | 1.444717 | 5.313677 | 1.67E-06 |
| IGFBP5   | -2.1841  | -7.83634 | 9.48E-11 | AXIN1    | 1.44508  | 6.763579 | 6.40E-09 |
| WFDC2    | -2.18978 | -3.48828 | 0.000918 | DUSP7    | 1.445245 | 7.36884  | 5.95E-10 |
| FABP3    | -2.2063  | -5.51163 | 7.95E-07 | GLA      | 1.445755 | 6.12255  | 7.73E-08 |

|          |          |          |          |         |          |          |          |
|----------|----------|----------|----------|---------|----------|----------|----------|
| WIF1     | -2.22093 | -4.25944 | 7.35E-05 | SUB1    | 1.448164 | 7.465553 | 4.07E-10 |
| ACTG2    | -2.22989 | -5.16065 | 2.94E-06 | SP110   | 1.450142 | 6.400497 | 2.63E-08 |
| CRYAB    | -2.24567 | -5.03939 | 4.60E-06 | SDC1    | 1.450583 | 4.820813 | 1.02E-05 |
| AZGP1    | -2.25124 | -3.01488 | 0.003768 | IFI16   | 1.454432 | 8.249743 | 1.88E-11 |
| MYF6     | -2.25286 | -5.28242 | 1.88E-06 | IGFBP3  | 1.455028 | 5.648644 | 4.74E-07 |
| THBS4    | -2.25365 | -4.75149 | 1.31E-05 | SLC25A5 | 1.455654 | 6.042588 | 1.05E-07 |
| CILP     | -2.25446 | -6.40759 | 2.56E-08 | NMI     | 1.457775 | 10.53408 | 2.97E-15 |
| MYOZ3    | -2.25497 | -7.01421 | 2.40E-09 | THY1    | 1.459839 | 4.732362 | 1.40E-05 |
| ASPA     | -2.25801 | -7.04108 | 2.16E-09 | LPCAT1  | 1.463007 | 9.782982 | 5.01E-14 |
| LTF      | -2.26772 | -3.5014  | 0.000881 | KRT10   | 1.464417 | 5.019688 | 4.94E-06 |
| KIAA1024 | -2.26819 | -6.59273 | 1.25E-08 | F2R     | 1.466783 | 5.380345 | 1.30E-06 |
| CLDN10   | -2.27162 | -4.18733 | 9.41E-05 | LMNB1   | 1.468196 | 4.725547 | 1.43E-05 |
| FOXA1    | -2.27563 | -4.51277 | 3.05E-05 | MAGEA12 | 1.469755 | 3.334311 | 0.001472 |
| PROM1    | -2.28222 | -4.03015 | 0.00016  | IVL     | 1.469875 | 3.321425 | 0.00153  |
| PKIA     | -2.29321 | -6.67853 | 8.92E-09 | ITGB4   | 1.471009 | 6.245827 | 4.80E-08 |
| USP13    | -2.29425 | -6.54606 | 1.50E-08 | ADM     | 1.472937 | 5.49709  | 8.40E-07 |
| PDK4     | -2.29734 | -4.93588 | 6.71E-06 | PCYT1A  | 1.474425 | 7.457488 | 4.20E-10 |
| SGCG     | -2.30572 | -5.102   | 3.66E-06 | HDAC1   | 1.474821 | 7.680878 | 1.75E-10 |
| RRAGD    | -2.34372 | -8.75577 | 2.61E-12 | MPDU1   | 1.476525 | 4.57684  | 2.43E-05 |
| RNASE4   | -2.35465 | -6.81791 | 5.17E-09 | PRSS23  | 1.479305 | 4.601956 | 2.23E-05 |
| CASQ2    | -2.36512 | -4.32054 | 5.96E-05 | KIF14   | 1.481679 | 6.728914 | 7.32E-09 |
| RYR1     | -2.39122 | -4.35373 | 5.31E-05 | NELL2   | 1.482363 | 4.50412  | 3.15E-05 |
| S100A1   | -2.39339 | -5.68543 | 4.12E-07 | OSTF1   | 1.484945 | 6.020794 | 1.14E-07 |
| DLK1     | -2.41007 | -7.686   | 1.71E-10 | IFIT1   | 1.486908 | 4.608242 | 2.18E-05 |
| MYOM2    | -2.412   | -4.50153 | 3.17E-05 | TCFL5   | 1.488375 | 6.315287 | 3.67E-08 |
| FXYD1    | -2.45109 | -9.5077  | 1.43E-13 | JUP     | 1.489797 | 5.795628 | 2.71E-07 |
| TPM2     | -2.47597 | -5.97804 | 1.35E-07 | TPM4    | 1.489969 | 5.706871 | 3.80E-07 |
| CACNA1S  | -2.47646 | -5.37664 | 1.32E-06 | BOLA2   | 1.491502 | 7.133159 | 1.50E-09 |
| CRISP3   | -2.47759 | -5.36389 | 1.38E-06 | SLC39A8 | 1.491585 | 3.064943 | 0.003264 |
| FLNC     | -2.54019 | -5.32678 | 1.59E-06 | PCK2    | 1.493428 | 4.210844 | 8.68E-05 |
| MUC7     | -2.55667 | -3.25013 | 0.001895 | SHB     | 1.496213 | 5.245607 | 2.15E-06 |
| ZBTB16   | -2.56293 | -7.23848 | 9.94E-10 | S100A10 | 1.498549 | 5.645582 | 4.79E-07 |
| PDLIM3   | -2.56519 | -4.73332 | 1.39E-05 | SH3GL1  | 1.499048 | 4.939059 | 6.64E-06 |
| TMOD1    | -2.58601 | -6.04502 | 1.04E-07 | ATP13A3 | 1.499972 | 7.419439 | 4.88E-10 |
| PIP      | -2.59006 | -3.41283 | 0.001159 | KCNK1   | 1.500429 | 5.178019 | 2.76E-06 |
| AMOT     | -2.59336 | -8.40999 | 1.00E-11 | NCLN    | 1.501058 | 7.054105 | 2.05E-09 |
| ADH1C    | -2.60976 | -6.07824 | 9.17E-08 | FOLR3   | 1.501723 | 4.364961 | 5.11E-05 |
| CSRP3    | -2.62604 | -4.56023 | 2.58E-05 | RAB31   | 1.508732 | 9.812842 | 4.48E-14 |
| ALDH1L1  | -2.63705 | -9.15362 | 5.58E-13 | CD53    | 1.513523 | 3.42191  | 0.001127 |
| MYBPC2   | -2.6475  | -4.51888 | 2.99E-05 | AP1S1   | 1.514131 | 7.033601 | 2.22E-09 |
| ADH1A    | -2.66838 | -7.62643 | 2.16E-10 | CCNE2   | 1.517639 | 6.374073 | 2.92E-08 |
| TNNI1    | -2.68471 | -3.39533 | 0.001222 | HLA-F   | 1.518439 | 6.839029 | 4.76E-09 |
| PPP1R3C  | -2.68492 | -7.0563  | 2.03E-09 | ASL     | 1.522198 | 5.013746 | 5.05E-06 |
| TCAP     | -2.71638 | -6.25095 | 4.71E-08 | LST1    | 1.524057 | 5.28585  | 1.85E-06 |
| PPP1R1A  | -2.72196 | -8.24416 | 1.92E-11 | CEMIP   | 1.527782 | 4.6923   | 1.62E-05 |
| PLA2G16  | -2.75879 | -6.51864 | 1.66E-08 | CD27    | 1.527848 | 2.676181 | 0.009593 |
| HBB      | -2.76929 | -6.02325 | 1.13E-07 | ITGA5   | 1.541763 | 5.346474 | 1.48E-06 |

|          |          |          |          |           |          |          |          |
|----------|----------|----------|----------|-----------|----------|----------|----------|
| ABCA8    | -2.79932 | -7.61919 | 2.23E-10 | SLC7A5    | 1.543529 | 5.542619 | 7.07E-07 |
| CHRD1    | -2.83763 | -7.66677 | 1.85E-10 | IL1RAP    | 1.544198 | 7.293315 | 8.01E-10 |
| CLIC5    | -2.86867 | -7.01371 | 2.40E-09 | PHLDA1    | 1.546119 | 4.160468 | 0.000103 |
| MFAP4    | -2.87135 | -8.29066 | 1.60E-11 | P2RY6     | 1.548622 | 5.927106 | 1.64E-07 |
| PHYH     | -2.87484 | -7.19379 | 1.18E-09 | TNFAIP3   | 1.550664 | 7.643426 | 2.02E-10 |
| GPD1     | -2.87657 | -8.5617  | 5.55E-12 | H2AFX     | 1.550717 | 5.104462 | 3.62E-06 |
| MYL2     | -2.90639 | -4.626   | 2.05E-05 | IL11      | 1.551579 | 3.65794  | 0.000539 |
| TNNT3    | -2.91985 | -5.25853 | 2.05E-06 | FN1       | 1.556122 | 3.439897 | 0.001066 |
| SLC25A4  | -2.92717 | -8.65561 | 3.85E-12 | NDEL1     | 1.557464 | 5.02049  | 4.93E-06 |
| TPM3     | -2.92852 | -5.43246 | 1.07E-06 | CAV2      | 1.561076 | 6.556781 | 1.43E-08 |
| ALDH1A1  | -2.93591 | -7.74127 | 1.38E-10 | PCNA      | 1.567588 | 7.164994 | 1.33E-09 |
| FBP2     | -2.9473  | -5.44532 | 1.02E-06 | LAPTM5    | 1.568572 | 4.298134 | 6.44E-05 |
| MYOZ2    | -2.95482 | -4.80225 | 1.09E-05 | BPGM      | 1.569601 | 6.46719  | 2.03E-08 |
| SGCA     | -2.99651 | -7.0125  | 2.41E-09 | HOMER3    | 1.569688 | 6.734011 | 7.18E-09 |
| HSPB6    | -3.00168 | -7.08068 | 1.85E-09 | TRIM29    | 1.570126 | 3.800623 | 0.00034  |
| ADH1B    | -3.00625 | -6.71474 | 7.74E-09 | PLSCR1    | 1.576493 | 5.930519 | 1.62E-07 |
| MYH11    | -3.00944 | -9.55963 | 1.17E-13 | CORO1A    | 1.581507 | 3.070994 | 0.003207 |
| DES      | -3.00987 | -4.40028 | 4.52E-05 | LAS1L     | 1.58305  | 6.811841 | 5.30E-09 |
| ADIPOQ   | -3.02697 | -5.38692 | 1.27E-06 | CELSR1    | 1.583431 | 5.202859 | 2.52E-06 |
| SYNM     | -3.03844 | -6.63965 | 1.04E-08 | TWF1      | 1.584862 | 7.16123  | 1.35E-09 |
| GAMT     | -3.04075 | -7.01714 | 2.37E-09 | IFI35     | 1.590893 | 8.243748 | 1.92E-11 |
| PDE4DIP  | -3.04552 | -4.88339 | 8.12E-06 | COL4A5    | 1.591538 | 6.047683 | 1.03E-07 |
| ART3     | -3.07978 | -4.99083 | 5.49E-06 | PPP4R1    | 1.593349 | 6.347599 | 3.24E-08 |
| SELENBP1 | -3.08172 | -12.4979 | 2.50E-18 | COL4A1    | 1.597383 | 6.420825 | 2.43E-08 |
| ACTN2    | -3.08386 | -5.40847 | 1.17E-06 | PCDH7     | 1.597537 | 6.126659 | 7.61E-08 |
| RPL3L    | -3.10248 | -5.84093 | 2.28E-07 | HTATIP2   | 1.59943  | 9.183491 | 4.98E-13 |
| FHL1     | -3.1277  | -6.3935  | 2.71E-08 | HIST1H2BK | 1.599608 | 6.579958 | 1.31E-08 |
| TNNC1    | -3.15552 | -4.16954 | 9.99E-05 | LTB4R     | 1.60398  | 4.924705 | 6.99E-06 |
| PADI2    | -3.16324 | -5.89823 | 1.83E-07 | AKR1B10   | 1.604592 | 4.121663 | 0.000118 |
| PPP1R3A  | -3.18622 | -5.81397 | 2.53E-07 | F2RL1     | 1.606291 | 7.6868   | 1.71E-10 |
| MYOM1    | -3.1909  | -6.76099 | 6.46E-09 | ATP1B3    | 1.607244 | 6.209032 | 5.53E-08 |
| PLN      | -3.19508 | -7.74432 | 1.36E-10 | RRP12     | 1.60988  | 5.017771 | 4.98E-06 |
| ACTA1    | -3.20639 | -3.7875  | 0.000355 | HIST1H2BL | 1.609907 | 6.618988 | 1.13E-08 |
| LDB3     | -3.21797 | -6.26197 | 4.51E-08 | IFI44L    | 1.61014  | 4.068779 | 0.00014  |
| TSPAN8   | -3.2233  | -8.87991 | 1.61E-12 | CHPF      | 1.610306 | 6.593696 | 1.24E-08 |
| MYH2     | -3.26477 | -4.06514 | 0.000142 | ALDH3B2   | 1.610476 | 4.430746 | 4.07E-05 |
| SH3BGR   | -3.26798 | -7.22145 | 1.06E-09 | ATP10D    | 1.611656 | 7.068903 | 1.93E-09 |
| AMPD1    | -3.31562 | -7.81522 | 1.03E-10 | AIM2      | 1.612035 | 7.580648 | 2.59E-10 |
| MYL1     | -3.37457 | -3.65497 | 0.000544 | CYP27B1   | 1.616504 | 6.742046 | 6.96E-09 |
| SLN      | -3.37937 | -4.56494 | 2.54E-05 | RIPK2     | 1.618185 | 5.438371 | 1.05E-06 |
| NEB      | -3.39693 | -4.52088 | 2.97E-05 | SOX15     | 1.618673 | 5.746923 | 3.26E-07 |
| MYBPC1   | -3.41776 | -6.55757 | 1.43E-08 | CHEK1     | 1.627867 | 4.652291 | 1.86E-05 |
| COX6A2   | -3.50692 | -5.64124 | 4.87E-07 | EREG      | 1.62995  | 3.376285 | 0.001296 |
| CA3      | -3.51376 | -6.09627 | 8.55E-08 | DBF4      | 1.63097  | 4.629512 | 2.02E-05 |
| TTN      | -3.56269 | -4.3072  | 6.24E-05 | UPP1      | 1.631437 | 5.452243 | 9.94E-07 |
| MYL3     | -3.58986 | -5.62561 | 5.17E-07 | CFB       | 1.631635 | 5.221064 | 2.35E-06 |
| COX7A1   | -3.59329 | -9.27158 | 3.55E-13 | RAC2      | 1.639242 | 5.636838 | 4.95E-07 |

|        |          |          |          |          |          |          |          |
|--------|----------|----------|----------|----------|----------|----------|----------|
| CAND2  | -3.62041 | -6.00419 | 1.22E-07 | CDKN2A   | 1.639512 | 3.821923 | 0.000318 |
| STATH  | -3.665   | -5.78138 | 2.86E-07 | LY6E     | 1.649776 | 6.211181 | 5.49E-08 |
| ATP1A2 | -3.6774  | -6.62908 | 1.08E-08 | OAS1     | 1.652454 | 7.589609 | 2.50E-10 |
| ENO3   | -3.7989  | -4.97786 | 5.76E-06 | GNA15    | 1.654427 | 5.57461  | 6.27E-07 |
| MB     | -3.81639 | -4.92927 | 6.88E-06 | KLK7     | 1.654449 | 4.138388 | 0.000111 |
| APOD   | -3.94552 | -8.21343 | 2.16E-11 | MIF      | 1.657738 | 9.162573 | 5.39E-13 |
| MYOC   | -3.94868 | -9.38892 | 2.26E-13 | PLA2G7   | 1.659131 | 4.615977 | 2.12E-05 |
| TNNI2  | -3.95041 | -5.37859 | 1.31E-06 | NDRG1    | 1.659224 | 6.797457 | 5.60E-09 |
| MYLPF  | -3.99426 | -4.2579  | 7.39E-05 | DSC3     | 1.660902 | 5.095232 | 3.75E-06 |
| MYH7   | -4.11179 | -4.39021 | 4.68E-05 | MYOF     | 1.664303 | 6.710652 | 7.87E-09 |
| CKMT2  | -4.14519 | -7.37186 | 5.88E-10 | DLGAP5   | 1.664484 | 7.067365 | 1.95E-09 |
| TNNC2  | -4.32103 | -4.82207 | 1.01E-05 | SCG5     | 1.666454 | 5.521775 | 7.65E-07 |
| ATP2A1 | -4.32365 | -5.81721 | 2.50E-07 | IFITM3   | 1.667817 | 7.26751  | 8.86E-10 |
| PGAM2  | -4.38866 | -7.45827 | 4.19E-10 | C14orf1  | 1.671403 | 5.612687 | 5.43E-07 |
| PYGM   | -5.04614 | -7.42455 | 4.78E-10 | GNLY     | 1.678765 | 5.644728 | 4.81E-07 |
|        |          |          |          | HIST1H3D | 1.679012 | 3.913513 | 0.000235 |
|        |          |          |          | PDCD10   | 1.679884 | 8.549663 | 5.81E-12 |
|        |          |          |          | ENO1     | 1.683386 | 8.202693 | 2.25E-11 |
|        |          |          |          | HCP5     | 1.684154 | 4.85411  | 9.03E-06 |
|        |          |          |          | MSN      | 1.686143 | 11.42408 | 1.13E-16 |
|        |          |          |          | S100A3   | 1.689355 | 5.363017 | 1.39E-06 |
|        |          |          |          | IFI44    | 1.693687 | 6.151825 | 6.90E-08 |
|        |          |          |          | CASP4    | 1.694341 | 7.296634 | 7.91E-10 |
|        |          |          |          | THBS2    | 1.696457 | 6.477395 | 1.95E-08 |
|        |          |          |          | CAPG     | 1.698012 | 7.209284 | 1.11E-09 |
|        |          |          |          | CXADR    | 1.698457 | 4.851609 | 9.11E-06 |
|        |          |          |          | COL4A6   | 1.699377 | 7.3396   | 6.68E-10 |
|        |          |          |          | CD44     | 1.706218 | 10.33593 | 6.23E-15 |
|        |          |          |          | GZMA     | 1.706798 | 4.512894 | 3.05E-05 |
|        |          |          |          | CD52     | 1.714004 | 3.335703 | 0.001466 |
|        |          |          |          | BASP1    | 1.716405 | 8.201552 | 2.26E-11 |
|        |          |          |          | TNFSF10  | 1.728937 | 7.245255 | 9.67E-10 |
|        |          |          |          | DSG2     | 1.7293   | 5.801341 | 2.65E-07 |
|        |          |          |          | HLA-A    | 1.729514 | 8.325039 | 1.40E-11 |
|        |          |          |          | C1QB     | 1.733165 | 4.732869 | 1.40E-05 |
|        |          |          |          | PFN1     | 1.73493  | 8.510987 | 6.76E-12 |
|        |          |          |          | PDPN     | 1.740271 | 8.289322 | 1.61E-11 |
|        |          |          |          | MMP7     | 1.744218 | 2.582686 | 0.012267 |
|        |          |          |          | ITGA6    | 1.74641  | 8.049266 | 4.11E-11 |
|        |          |          |          | ASNA1    | 1.748365 | 4.597625 | 2.26E-05 |
|        |          |          |          | SPAG5    | 1.748625 | 5.516995 | 7.79E-07 |
|        |          |          |          | YWHAZ    | 1.749296 | 9.251926 | 3.82E-13 |
|        |          |          |          | PRNP     | 1.751157 | 8.350282 | 1.27E-11 |
|        |          |          |          | SERPINE2 | 1.753859 | 7.435712 | 4.58E-10 |
|        |          |          |          | SPINT2   | 1.759644 | 4.776682 | 1.19E-05 |
|        |          |          |          | ACP5     | 1.764484 | 6.786595 | 5.85E-09 |
|        |          |          |          | PFKP     | 1.768355 | 5.095182 | 3.75E-06 |

|           |          |          |          |
|-----------|----------|----------|----------|
| C2orf27A  | 1.770093 | 5.185407 | 2.69E-06 |
| CXCL1     | 1.772497 | 4.882736 | 8.14E-06 |
| DKK1      | 1.773059 | 3.544711 | 0.00077  |
| CDC25B    | 1.781106 | 6.851404 | 4.54E-09 |
| STAT1     | 1.781782 | 8.403829 | 1.03E-11 |
| CCL4      | 1.787465 | 4.640242 | 1.94E-05 |
| TMSB10    | 1.791409 | 11.75203 | 3.48E-17 |
| HIST1H2AE | 1.792418 | 5.212119 | 2.43E-06 |
| VASP      | 1.795273 | 7.63144  | 2.12E-10 |
| PLAUR     | 1.800427 | 6.979726 | 2.74E-09 |
| DFNA5     | 1.800717 | 7.209216 | 1.11E-09 |
| PNP       | 1.801991 | 7.355037 | 6.28E-10 |
| BNC1      | 1.806689 | 6.977602 | 2.77E-09 |
| PTBP3     | 1.818934 | 6.926927 | 3.37E-09 |
| LAD1      | 1.823421 | 4.778448 | 1.19E-05 |
| GINS1     | 1.823708 | 7.043541 | 2.14E-09 |
| STK3      | 1.828893 | 7.591176 | 2.48E-10 |
| PTGES     | 1.834797 | 5.554628 | 6.76E-07 |
| TTK       | 1.840535 | 6.205914 | 5.60E-08 |
| HIF1A     | 1.84781  | 9.256371 | 3.76E-13 |
| SLC16A1   | 1.850551 | 5.892184 | 1.87E-07 |
| MYO5A     | 1.854582 | 7.380115 | 5.70E-10 |
| IFIT3     | 1.857637 | 6.06433  | 9.67E-08 |
| F3        | 1.85809  | 4.473    | 3.51E-05 |
| CTSC      | 1.863694 | 10.892   | 7.90E-16 |
| MAPK13    | 1.86461  | 4.337546 | 5.62E-05 |
| MDFI      | 1.866176 | 7.421121 | 4.85E-10 |
| TFAP2A    | 1.873684 | 5.613984 | 5.40E-07 |
| TUBB2A    | 1.877586 | 8.122439 | 3.09E-11 |
| CDA       | 1.878232 | 4.973576 | 5.85E-06 |
| NT5E      | 1.887432 | 4.180496 | 9.63E-05 |
| KLK8      | 1.887744 | 3.751115 | 0.0004   |
| CNGB1     | 1.894476 | 8.872814 | 1.65E-12 |
| TAP2      | 1.897969 | 6.343467 | 3.29E-08 |
| TK1       | 1.924666 | 8.435071 | 9.09E-12 |
| LOXL2     | 1.924706 | 6.018415 | 1.15E-07 |
| TES       | 1.925342 | 7.129726 | 1.52E-09 |
| GZMB      | 1.931816 | 4.392439 | 4.65E-05 |
| TAP1      | 1.934108 | 8.516265 | 6.62E-12 |
| FCER1G    | 1.942611 | 5.963731 | 1.42E-07 |
| GNAI1     | 1.947075 | 8.811913 | 2.10E-12 |
| STK17B    | 1.947229 | 5.543453 | 7.05E-07 |
| HMGCS1    | 1.948892 | 5.164971 | 2.90E-06 |
| MYBL2     | 1.955705 | 6.15611  | 6.79E-08 |
| LAMB3     | 1.956934 | 6.211178 | 5.49E-08 |
| ACTN1     | 1.95881  | 9.918125 | 3.00E-14 |
| BUB1      | 1.971565 | 7.540008 | 3.04E-10 |

|          |          |          |          |
|----------|----------|----------|----------|
| TPST1    | 1.974337 | 8.049671 | 4.11E-11 |
| VEGFC    | 1.978443 | 4.354513 | 5.30E-05 |
| GRN      | 2.000766 | 6.17746  | 6.25E-08 |
| TP63     | 2.000841 | 8.24019  | 1.95E-11 |
| PDZK1IP1 | 2.004805 | 4.490387 | 3.30E-05 |
| OASL     | 2.014493 | 7.42646  | 4.75E-10 |
| DSC2     | 2.022209 | 5.037792 | 4.63E-06 |
| KPNA2    | 2.027821 | 7.816347 | 1.03E-10 |
| GGH      | 2.032013 | 7.511373 | 3.40E-10 |
| CASP1    | 2.033912 | 8.30901  | 1.49E-11 |
| LRP8     | 2.047473 | 8.028927 | 4.45E-11 |
| SULF1    | 2.049035 | 4.774649 | 1.20E-05 |
| IFI6     | 2.049785 | 8.626485 | 4.31E-12 |
| BST2     | 2.051129 | 7.293646 | 8.00E-10 |
| KIF2C    | 2.053825 | 6.762974 | 6.41E-09 |
| ITGA2    | 2.060734 | 7.478409 | 3.87E-10 |
| GJB3     | 2.069178 | 6.834313 | 4.85E-09 |
| GART     | 2.071568 | 7.746412 | 1.35E-10 |
| ANXA2    | 2.073678 | 8.071458 | 3.77E-11 |
| KIF23    | 2.077935 | 5.807065 | 2.59E-07 |
| GBP1     | 2.083381 | 7.056295 | 2.03E-09 |
| MX1      | 2.090105 | 7.388172 | 5.52E-10 |
| COL3A1   | 2.091197 | 5.497577 | 8.38E-07 |
| PSMB8    | 2.097789 | 6.950648 | 3.07E-09 |
| GPR137B  | 2.098843 | 7.272616 | 8.69E-10 |
| COL1A2   | 2.107475 | 6.899199 | 3.76E-09 |
| SFN      | 2.110735 | 5.320073 | 1.63E-06 |
| CDK5     | 2.114478 | 10.69105 | 1.66E-15 |
| S100A9   | 2.114941 | 3.531213 | 0.000803 |
| TPX2     | 2.122775 | 6.610592 | 1.16E-08 |
| PLCB3    | 2.138544 | 6.213615 | 5.44E-08 |
| FABP5    | 2.140823 | 7.797149 | 1.11E-10 |
| BMP2     | 2.149846 | 7.138171 | 1.47E-09 |
| NEFL     | 2.154494 | 6.247227 | 4.77E-08 |
| ELF4     | 2.156904 | 7.669186 | 1.83E-10 |
| S100A11  | 2.160414 | 6.062872 | 9.73E-08 |
| CXCL13   | 2.170293 | 3.860428 | 0.00028  |
| PTK7     | 2.170898 | 8.289877 | 1.60E-11 |
| AHNAK2   | 2.172139 | 5.755858 | 3.15E-07 |
| DSC1     | 2.183171 | 3.637504 | 0.000575 |
| ABCA12   | 2.192604 | 5.156028 | 3.00E-06 |
| KIF11    | 2.197077 | 6.097435 | 8.52E-08 |
| CYP24A1  | 2.19731  | 5.710404 | 3.75E-07 |
| TRIM14   | 2.203087 | 7.150873 | 1.40E-09 |
| COL5A2   | 2.203845 | 7.331144 | 6.90E-10 |
| DUSP14   | 2.218426 | 7.224601 | 1.05E-09 |
| COL11A1  | 2.232169 | 4.680436 | 1.69E-05 |

|          |          |          |          |
|----------|----------|----------|----------|
| MICB     | 2.24811  | 7.058974 | 2.01E-09 |
| STAM2    | 2.250018 | 8.015293 | 4.70E-11 |
| YKT6     | 2.251639 | 8.575486 | 5.26E-12 |
| KCNJ15   | 2.253822 | 8.325407 | 1.39E-11 |
| DSP      | 2.259377 | 4.826026 | 1.00E-05 |
| ARPC1B   | 2.263211 | 10.28363 | 7.57E-15 |
| CCNB2    | 2.266699 | 8.292491 | 1.59E-11 |
| ADORA2B  | 2.270001 | 5.567432 | 6.44E-07 |
| CCNB1    | 2.283908 | 7.061131 | 1.99E-09 |
| CTSV     | 2.293292 | 7.00084  | 2.53E-09 |
| MYO10    | 2.312412 | 8.964436 | 1.16E-12 |
| SERPINB5 | 2.316827 | 5.330743 | 1.57E-06 |
| BAK1     | 2.31866  | 10.71103 | 1.54E-15 |
| SPRR1B   | 2.319801 | 3.097545 | 0.00297  |
| PHLDA2   | 2.332876 | 8.142537 | 2.85E-11 |
| ASCC3    | 2.338711 | 7.254509 | 9.33E-10 |
| PLAU     | 2.3403   | 10.07539 | 1.66E-14 |
| LAMA3    | 2.342691 | 7.207141 | 1.12E-09 |
| DSG3     | 2.349786 | 4.445532 | 3.86E-05 |
| CKS2     | 2.351803 | 8.691467 | 3.35E-12 |
| GPR183   | 2.359542 | 4.854488 | 9.02E-06 |
| PTTG1    | 2.361423 | 7.31874  | 7.25E-10 |
| CDC20    | 2.377067 | 8.674261 | 3.58E-12 |
| CCL18    | 2.379759 | 4.82393  | 1.01E-05 |
| RUNX3    | 2.395863 | 7.680991 | 1.75E-10 |
| SERPINB3 | 2.403984 | 4.373291 | 4.97E-05 |
| NDC80    | 2.42235  | 6.536556 | 1.55E-08 |
| ANXA2P1  | 2.423777 | 8.166373 | 2.60E-11 |
| KRT5     | 2.431042 | 4.652568 | 1.86E-05 |
| APOL1    | 2.433998 | 7.294489 | 7.97E-10 |
| PTGS2    | 2.439703 | 5.104492 | 3.62E-06 |
| FAP      | 2.439918 | 8.160177 | 2.66E-11 |
| SCO2     | 2.441406 | 9.313714 | 3.01E-13 |
| CCL20    | 2.460508 | 5.50195  | 8.25E-07 |
| POLR1C   | 2.480654 | 8.283545 | 1.64E-11 |
| XAF1     | 2.492915 | 7.238886 | 9.92E-10 |
| LAMP3    | 2.497003 | 6.983923 | 2.70E-09 |
| SERPINB8 | 2.504218 | 7.093734 | 1.75E-09 |
| KRT6A    | 2.533408 | 6.220417 | 5.30E-08 |
| EFNA1    | 2.534261 | 7.120247 | 1.58E-09 |
| LY6D     | 2.535858 | 3.744626 | 0.000408 |
| LSR      | 2.57467  | 6.068783 | 9.51E-08 |
| CHI3L1   | 2.576694 | 5.776788 | 2.91E-07 |
| POSTN    | 2.580822 | 7.281468 | 8.39E-10 |
| RSAD2    | 2.583065 | 5.319462 | 1.63E-06 |
| CLCA2    | 2.589918 | 7.26362  | 9.00E-10 |
| FGFBP1   | 2.601835 | 4.34223  | 5.53E-05 |



|          |          |          |          |
|----------|----------|----------|----------|
| FSCN1    | 2.613153 | 10.906   | 7.50E-16 |
| CDH3     | 2.653868 | 11.73324 | 3.72E-17 |
| APOBEC3B | 2.65486  | 7.575004 | 2.65E-10 |
| PYGL     | 2.662565 | 9.751077 | 5.66E-14 |
| NUP155   | 2.674107 | 8.256059 | 1.83E-11 |
| SERPINE1 | 2.68803  | 7.550294 | 2.92E-10 |
| KRT75    | 2.693009 | 7.642811 | 2.03E-10 |
| IGSF3    | 2.712607 | 6.894924 | 3.82E-09 |
| CXCL9    | 2.715784 | 5.557581 | 6.69E-07 |
| MYO1B    | 2.729415 | 12.18003 | 7.62E-18 |
| MMP12    | 2.739998 | 9.463797 | 1.70E-13 |
| SNAI2    | 2.767017 | 8.250272 | 1.87E-11 |
| AREG     | 2.774405 | 6.386893 | 2.78E-08 |
| CTPS1    | 2.793648 | 10.45198 | 4.04E-15 |
| TNC      | 2.832664 | 10.26759 | 8.04E-15 |
| PTPRZ1   | 2.845334 | 5.913242 | 1.73E-07 |
| RGS20    | 2.937217 | 10.63871 | 2.01E-15 |
| S100A2   | 2.938165 | 7.203922 | 1.14E-09 |
| GJA1     | 2.957856 | 11.5064  | 8.42E-17 |
| KIAA0101 | 2.958386 | 8.885916 | 1.57E-12 |
| TGFBI    | 2.972154 | 9.269705 | 3.57E-13 |
| COL17A1  | 2.98263  | 6.753847 | 6.64E-09 |
| CDKN3    | 2.988991 | 9.038373 | 8.71E-13 |
| ISG15    | 3.00374  | 10.36828 | 5.52E-15 |
| UBE2C    | 3.008555 | 8.595391 | 4.86E-12 |
| CHST2    | 3.058357 | 7.653796 | 1.94E-10 |
| PTHLH    | 3.1791   | 9.432213 | 1.91E-13 |
| RBP1     | 3.248238 | 8.927932 | 1.34E-12 |
| CXCL11   | 3.249236 | 6.314779 | 3.68E-08 |
| KRT14    | 3.299558 | 7.157879 | 1.36E-09 |
| MMP9     | 3.313782 | 7.764072 | 1.26E-10 |
| SPP1     | 3.331132 | 6.782933 | 5.93E-09 |
| PI3      | 3.331424 | 6.815791 | 5.21E-09 |
| LAMC2    | 3.418757 | 10.07355 | 1.67E-14 |
| IFI27    | 3.46067  | 10.29381 | 7.29E-15 |
| KRT16    | 3.485348 | 7.560718 | 2.80E-10 |
| CXCL10   | 3.507572 | 6.411933 | 2.52E-08 |
| MMP3     | 3.88762  | 7.586868 | 2.53E-10 |
| TYMP     | 3.977677 | 12.6639  | 1.41E-18 |
| S100A7   | 4.019238 | 6.828292 | 4.97E-09 |
| MMP13    | 4.466895 | 7.555042 | 2.86E-10 |
| MMP10    | 4.698412 | 7.447426 | 4.37E-10 |
| MMP1     | 5.918185 | 11.3564  | 1.45E-16 |

### The significantly changed genes of GSE30784

| Downregulated |          |          |          | Upregulated |          |          |          |
|---------------|----------|----------|----------|-------------|----------|----------|----------|
| ID            | logFC    | t        | P.Value  | ID          | logFC    | t        | P.Value  |
| PLXNA2        | -1.00023 | -10.0997 | 8.16E-20 | CLDN1       | 1.00011  | 4.180389 | 4.26E-05 |
| BAG1          | -1.00117 | -8.04973 | 5.99E-14 | FOXQ1       | 1.00017  | 4.613132 | 6.88E-06 |
| LINC00948     | -1.0021  | -4.28066 | 2.83E-05 | HORMAD1     | 1.000583 | 2.853567 | 0.004754 |
| MKNK2         | -1.00259 | -8.89008 | 2.76E-16 | CD300LF     | 1.000609 | 5.751922 | 3.07E-08 |
| C15orf59      | -1.00283 | -13.8324 | 2.14E-31 | IL18R1      | 1.000701 | 5.800347 | 2.40E-08 |
| TSTD1         | -1.00315 | -6.29958 | 1.71E-09 | C1S         | 1.001079 | 7.20274  | 1.03E-11 |
| ZFP3          | -1.00321 | -6.92091 | 5.30E-11 | CLSTN1      | 1.001662 | 11.36141 | 1.20E-23 |
| ATP1B1        | -1.00331 | -8.34227 | 9.47E-15 | MFSD10      | 1.001709 | 8.132896 | 3.56E-14 |
| SMAD9         | -1.00429 | -9.24478 | 2.65E-17 | VOPP1       | 1.002606 | 7.649674 | 7.07E-13 |
| TCL1A         | -1.0066  | -4.17927 | 4.28E-05 | NGFRAP1     | 1.004754 | 10.08855 | 8.80E-20 |
| DBI           | -1.00673 | -9.61782 | 2.18E-18 | TMEM138     | 1.004819 | 12.02498 | 1.05E-25 |
| RELN          | -1.00718 | -7.8968  | 1.55E-13 | MAGEA11     | 1.005617 | 3.40355  | 0.000796 |
| MBOAT1        | -1.0091  | -7.4871  | 1.89E-12 | ISG20       | 1.006123 | 5.204665 | 4.60E-07 |
| CXCL12        | -1.00959 | -3.67109 | 0.000306 | EML1        | 1.008013 | 5.024769 | 1.07E-06 |
| AHNAK         | -1.00971 | -13.7855 | 3.01E-31 | ELF4        | 1.008579 | 12.02528 | 1.04E-25 |
| DEFB1         | -1.01058 | -2.88075 | 0.004377 | ASTN2       | 1.009761 | 6.932325 | 4.96E-11 |
| EPHX1         | -1.01117 | -5.45359 | 1.37E-07 | LYN         | 1.010224 | 5.955402 | 1.07E-08 |
| RHOD          | -1.01128 | -4.73481 | 4.02E-06 | ERVMER34    | 1.011022 | 5.8965   | 1.46E-08 |
| HIBCH         | -1.01239 | -9.21804 | 3.17E-17 | RHOBTB1     | 1.011953 | 5.73063  | 3.43E-08 |
| PEBP1         | -1.01342 | -12.7225 | 6.83E-28 | STEAP2      | 1.01311  | 6.626084 | 2.83E-10 |
| GMDS          | -1.01358 | -11.5642 | 2.83E-24 | AKR1B1      | 1.013485 | 7.969291 | 9.89E-14 |
| SMDT1         | -1.0137  | -15.9214 | 5.25E-38 | ASAP1       | 1.013782 | 13.45995 | 3.22E-30 |
| PCBD2         | -1.01405 | -9.7495  | 8.92E-19 | NCAPH       | 1.014951 | 6.815935 | 9.66E-11 |
| MIPEP         | -1.01413 | -9.63884 | 1.89E-18 | CCR7        | 1.01496  | 3.301245 | 0.00113  |
| CAMK2N1       | -1.01428 | -5.18434 | 5.07E-07 | RNF217      | 1.017122 | 9.040636 | 1.03E-16 |
| CRTAC1        | -1.01634 | -16.3126 | 3.08E-39 | CDK4        | 1.017922 | 14.3328  | 5.56E-33 |
| SUCLG2        | -1.01731 | -12.2624 | 1.90E-26 | CEMIP       | 1.018554 | 9.371268 | 1.14E-17 |
| CLINT1        | -1.01815 | -11.1666 | 4.76E-23 | MYO10       | 1.019525 | 8.2272   | 1.96E-14 |
| MPZL3         | -1.0198  | -9.35684 | 1.26E-17 | CENPL       | 1.019724 | 10.33217 | 1.64E-20 |
| PLIN1         | -1.01997 | -6.54287 | 4.50E-10 | MLLT11      | 1.020143 | 3.810103 | 0.000182 |
| LY6G6C        | -1.02176 | -3.60705 | 0.000387 | KRT6A       | 1.020786 | 7.338615 | 4.60E-12 |
| LY6D          | -1.02208 | -3.19726 | 0.001601 | FTL         | 1.022137 | 11.05917 | 1.02E-22 |
| ACER1         | -1.02359 | -7.18144 | 1.16E-11 | HSD17B6     | 1.023761 | 7.67232  | 6.16E-13 |
| SEMA4D        | -1.024   | -8.60978 | 1.71E-15 | FLG2        | 1.02422  | 2.445069 | 0.015303 |
| ABCA6         | -1.02446 | -7.54309 | 1.35E-12 | DTX3L       | 1.025818 | 9.735775 | 9.79E-19 |
| DLEU1         | -1.02663 | -8.8205  | 4.35E-16 | MMP19       | 1.026491 | 9.615434 | 2.21E-18 |
| SOX21-AS1     | -1.0271  | -8.37811 | 7.54E-15 | VEGFA       | 1.027423 | 6.058918 | 6.22E-09 |
| STYK1         | -1.02904 | -7.2982  | 5.84E-12 | RAD51AP1    | 1.027486 | 7.115477 | 1.71E-11 |
| CBX7          | -1.02988 | -6.9014  | 5.93E-11 | TMCC3       | 1.027804 | 7.578026 | 1.09E-12 |
| ECHDC3        | -1.03129 | -3.99619 | 8.90E-05 | CKS1B       | 1.028176 | 9.320908 | 1.60E-17 |
| DENND2D       | -1.03205 | -6.63411 | 2.70E-10 | HOXD11      | 1.028486 | 6.788609 | 1.13E-10 |
| TCP11L2       | -1.03212 | -18.6421 | 1.77E-46 | FUT8        | 1.029124 | 6.934703 | 4.89E-11 |
| MOB4          | -1.0371  | -13.635  | 9.00E-31 | ITM2C       | 1.029955 | 6.677712 | 2.11E-10 |
| AR            | -1.03832 | -12.5573 | 2.26E-27 | NINJ2       | 1.030291 | 7.286893 | 6.25E-12 |

|           |          |          |          |           |          |          |          |
|-----------|----------|----------|----------|-----------|----------|----------|----------|
| CBR3      | -1.03839 | -5.64918 | 5.18E-08 | CLEC4A    | 1.031981 | 6.002357 | 8.38E-09 |
| NLRX1     | -1.03845 | -7.07913 | 2.12E-11 | FZD6      | 1.033085 | 7.271483 | 6.85E-12 |
| HEBP2     | -1.0386  | -14.8322 | 1.45E-34 | MYO5A     | 1.033354 | 9.270026 | 2.24E-17 |
| DUOXA1    | -1.04005 | -6.93067 | 5.01E-11 | APP       | 1.033452 | 10.85347 | 4.33E-22 |
| FAM171A1  | -1.04026 | -5.4936  | 1.13E-07 | PSTPIP2   | 1.034769 | 6.977448 | 3.82E-11 |
| ERO1L     | -1.04297 | -6.89091 | 6.29E-11 | SERPINA1  | 1.034814 | 9.240143 | 2.74E-17 |
| FBXO40    | -1.04311 | -6.23247 | 2.46E-09 | LEPREL4   | 1.03684  | 8.505176 | 3.35E-15 |
| TMEM255/  | -1.0435  | -4.99059 | 1.26E-06 | SLFN11    | 1.037387 | 6.938245 | 4.79E-11 |
| SYNPO2    | -1.04552 | -4.60978 | 6.98E-06 | NLRC5     | 1.037652 | 5.945308 | 1.13E-08 |
| PANK1     | -1.04653 | -6.80083 | 1.05E-10 | MMP14     | 1.040082 | 6.851972 | 7.87E-11 |
| CERS4     | -1.04663 | -7.46489 | 2.16E-12 | FOSB      | 1.04034  | 2.583    | 0.010471 |
| GOLPH3L   | -1.04679 | -9.25452 | 2.49E-17 | RPS6KA1   | 1.040854 | 9.623146 | 2.10E-18 |
| DLG3      | -1.04711 | -9.69261 | 1.31E-18 | SULT1E1   | 1.042318 | 4.557434 | 8.76E-06 |
| ATG9B     | -1.0478  | -8.16088 | 2.98E-14 | FAM83B    | 1.04242  | 5.492812 | 1.13E-07 |
| ZNF426    | -1.04963 | -6.68044 | 2.08E-10 | TWSG1     | 1.042561 | 10.61318 | 2.33E-21 |
| MAPK3     | -1.05058 | -13.1979 | 2.17E-29 | AHR       | 1.042696 | 10.38891 | 1.11E-20 |
| XK        | -1.05091 | -4.85157 | 2.38E-06 | TMEM263   | 1.042965 | 7.584964 | 1.05E-12 |
| PPARG     | -1.05202 | -8.7628  | 6.33E-16 | NEK2      | 1.043258 | 6.886074 | 6.47E-11 |
| USP9Y     | -1.05301 | -3.43601 | 0.000711 | HLA-J     | 1.044979 | 9.95493  | 2.20E-19 |
| CYP11A1   | -1.05488 | -8.75032 | 6.87E-16 | ZNF114    | 1.047066 | 5.624304 | 5.87E-08 |
| FAM63A    | -1.05553 | -13.7314 | 4.46E-31 | ASAP1-IT1 | 1.04763  | 8.192371 | 2.45E-14 |
| SCNN1A    | -1.05613 | -9.27916 | 2.11E-17 | PHLDB2    | 1.047638 | 9.598285 | 2.48E-18 |
| PALMD     | -1.05663 | -7.99871 | 8.24E-14 | RNASEH2A  | 1.047775 | 8.040265 | 6.36E-14 |
| POF1B     | -1.05775 | -4.91982 | 1.74E-06 | HSPA2     | 1.049114 | 5.027047 | 1.06E-06 |
| GRAMD3    | -1.05804 | -9.381   | 1.07E-17 | EXO1      | 1.049418 | 7.426451 | 2.72E-12 |
| EMP2      | -1.0588  | -8.86009 | 3.36E-16 | SHOX2     | 1.051466 | 8.437738 | 5.15E-15 |
| SLC44A2   | -1.05908 | -12.2608 | 1.92E-26 | EDNRA     | 1.054231 | 5.382241 | 1.95E-07 |
| MYH6      | -1.06046 | -5.83697 | 1.99E-08 | IFNGR1    | 1.054554 | 11.63721 | 1.68E-24 |
| ATP6V0E2  | -1.06129 | -6.75563 | 1.36E-10 | MXRA5     | 1.054658 | 4.831196 | 2.61E-06 |
| HSBP1     | -1.06152 | -16.8251 | 7.59E-41 | RNF19B    | 1.054781 | 7.578909 | 1.09E-12 |
| ZHX1      | -1.06163 | -11.0016 | 1.53E-22 | ADTRP     | 1.055996 | 6.506897 | 5.49E-10 |
| IGFBP6    | -1.06184 | -3.49983 | 0.000568 | FXYS5     | 1.057804 | 6.357091 | 1.25E-09 |
| TC2N      | -1.06278 | -9.1215  | 6.02E-17 | PTK7      | 1.059884 | 11.15807 | 5.06E-23 |
| LINC01003 | -1.06407 | -7.82494 | 2.42E-13 | COL6A1    | 1.060048 | 9.81723  | 5.63E-19 |
| CAMSAP3   | -1.06466 | -8.31665 | 1.11E-14 | APOLD1    | 1.061486 | 6.486068 | 6.16E-10 |
| VPS4B     | -1.06507 | -11.6694 | 1.34E-24 | RUVBL1    | 1.062867 | 9.443828 | 7.02E-18 |
| RAI2      | -1.06637 | -8.0737  | 5.16E-14 | SELL      | 1.06626  | 3.020691 | 0.002834 |
| HSD17B8   | -1.06681 | -8.41449 | 5.98E-15 | GNB4      | 1.066681 | 9.410332 | 8.79E-18 |
| C6orf58   | -1.06698 | -3.1489  | 0.001876 | MME       | 1.068548 | 5.472148 | 1.25E-07 |
| TEX101    | -1.06829 | -10.7496 | 8.96E-22 | CD109     | 1.06898  | 7.738605 | 4.11E-13 |
| TNNI1     | -1.06846 | -2.14958 | 0.032727 | SLC3A2    | 1.06956  | 9.474957 | 5.70E-18 |
| TLR5      | -1.06915 | -6.19122 | 3.07E-09 | AGTRAP    | 1.070734 | 13.6121  | 1.06E-30 |
| FCGBP     | -1.07154 | -3.55017 | 0.000475 | APMAP     | 1.071466 | 11.62047 | 1.89E-24 |
| BCKDHB    | -1.07206 | -11.1336 | 6.01E-23 | ARRB2     | 1.071575 | 6.97369  | 3.91E-11 |
| SLIT2     | -1.07265 | -5.77937 | 2.67E-08 | BAK1      | 1.071828 | 9.197449 | 3.64E-17 |
| MAP3K1    | -1.07286 | -11.1152 | 6.85E-23 | EN1       | 1.072561 | 4.799161 | 3.01E-06 |
| SCARA3    | -1.07484 | -9.41779 | 8.36E-18 | COL8A2    | 1.072756 | 6.133221 | 4.19E-09 |

|           |          |          |          |          |          |          |          |
|-----------|----------|----------|----------|----------|----------|----------|----------|
| MYRIP     | -1.07521 | -14.7938 | 1.92E-34 | CACNA2D3 | 1.073715 | 6.615791 | 2.99E-10 |
| OR7E47P   | -1.07543 | -7.73373 | 4.23E-13 | PAG1     | 1.07377  | 6.989536 | 3.57E-11 |
| PRADC1    | -1.07639 | -9.62834 | 2.03E-18 | CCM2     | 1.074263 | 10.50692 | 4.88E-21 |
| PRELP     | -1.07688 | -6.95872 | 4.26E-11 | NDRG1    | 1.074977 | 7.040116 | 2.66E-11 |
| E2F8      | -1.0795  | -6.35541 | 1.26E-09 | HLA-A    | 1.075588 | 11.60665 | 2.09E-24 |
| ALDH6A1   | -1.07953 | -9.9716  | 1.96E-19 | LAPTM5   | 1.075646 | 5.821226 | 2.15E-08 |
| MEOX2     | -1.07984 | -10.2943 | 2.13E-20 | UBE2S    | 1.075782 | 8.172077 | 2.78E-14 |
| LGALS3    | -1.07992 | -9.51781 | 4.27E-18 | LRP8     | 1.0769   | 7.550376 | 1.29E-12 |
| TMOD3     | -1.08106 | -12.7836 | 4.38E-28 | SP110    | 1.077517 | 6.847841 | 8.05E-11 |
| XPA       | -1.08322 | -9.94912 | 2.29E-19 | AKR1B10  | 1.079954 | 2.890828 | 0.004244 |
| FAM172A   | -1.08354 | -11.3137 | 1.68E-23 | HLA-F    | 1.080692 | 8.013642 | 7.50E-14 |
| FIBIN     | -1.08408 | -5.41763 | 1.64E-07 | UBE2T    | 1.081469 | 7.043075 | 2.61E-11 |
| ISOC1     | -1.08471 | -9.85827 | 4.26E-19 | CLEC7A   | 1.081724 | 8.773628 | 5.90E-16 |
| TRIM13    | -1.08617 | -11.8279 | 4.30E-25 | ACTN1    | 1.083109 | 9.936045 | 2.50E-19 |
| PARD3     | -1.09033 | -9.57051 | 2.99E-18 | RBBP8    | 1.084104 | 8.980444 | 1.53E-16 |
| SPRR1A    | -1.09143 | -3.38232 | 0.000857 | FKBP14   | 1.085163 | 9.131581 | 5.63E-17 |
| MAPK13    | -1.09314 | -7.12514 | 1.62E-11 | MYC      | 1.085619 | 7.93042  | 1.26E-13 |
| NR2F2-AS1 | -1.09355 | -9.63815 | 1.90E-18 | BPIFC    | 1.089522 | 3.684149 | 0.000292 |
| RAB27B    | -1.09371 | -7.03898 | 2.68E-11 | C1QTNF6  | 1.089587 | 8.279537 | 1.41E-14 |
| C4orf3    | -1.09469 | -13.8825 | 1.48E-31 | FEN1     | 1.089744 | 8.795195 | 5.13E-16 |
| ACAA1     | -1.09653 | -12.3918 | 7.46E-27 | OIP5     | 1.092133 | 5.954191 | 1.08E-08 |
| PHACTR2   | -1.09715 | -10.7102 | 1.18E-21 | SLC39A14 | 1.092361 | 11.20025 | 3.75E-23 |
| B3GALT5   | -1.09718 | -8.64103 | 1.39E-15 | SOX4     | 1.093055 | 11.2003  | 3.75E-23 |
| ANKRD22   | -1.09795 | -5.40568 | 1.74E-07 | GNA12    | 1.093797 | 11.49298 | 4.70E-24 |
| VLDLR     | -1.09828 | -5.61409 | 6.18E-08 | ACVR1    | 1.097882 | 10.99485 | 1.60E-22 |
| TLE2      | -1.09892 | -8.56963 | 2.21E-15 | ID3      | 1.099596 | 8.650473 | 1.31E-15 |
| LOC10013C | -1.10426 | -6.99777 | 3.40E-11 | TMEM44   | 1.100386 | 8.403269 | 6.42E-15 |
| FAM149A   | -1.10543 | -12.5735 | 2.01E-27 | PTPRK    | 1.102085 | 10.84794 | 4.50E-22 |
| GSTM5     | -1.10598 | -13.4896 | 2.60E-30 | BAX      | 1.102465 | 12.94401 | 1.37E-28 |
| TNFRSF11A | -1.10613 | -9.65942 | 1.64E-18 | MNDA     | 1.102824 | 6.201189 | 2.91E-09 |
| PIM1      | -1.10622 | -8.10804 | 4.16E-14 | EXT2     | 1.102956 | 9.176762 | 4.17E-17 |
| LIPH      | -1.10778 | -8.26458 | 1.55E-14 | TK1      | 1.103086 | 7.918502 | 1.36E-13 |
| GALNT5    | -1.10814 | -9.15909 | 4.69E-17 | BC027448 | 1.105213 | 7.31202  | 5.38E-12 |
| ABCA5     | -1.1082  | -10.4745 | 6.11E-21 | FAM198B  | 1.106569 | 6.7003   | 1.86E-10 |
| TCEA3     | -1.10827 | -9.11505 | 6.28E-17 | GIN51    | 1.106584 | 8.072591 | 5.19E-14 |
| CD1A      | -1.10842 | -5.00641 | 1.17E-06 | FBXO6    | 1.106739 | 6.347993 | 1.32E-09 |
| HYMAI     | -1.10973 | -7.58988 | 1.02E-12 | NID1     | 1.10727  | 8.919237 | 2.28E-16 |
| NCOA1     | -1.1115  | -12.1977 | 3.02E-26 | EIF5A2   | 1.107282 | 7.571776 | 1.13E-12 |
| HSPB2     | -1.1136  | -6.24125 | 2.35E-09 | SHCBP1   | 1.107574 | 7.553648 | 1.27E-12 |
| IDNK      | -1.1137  | -9.7824  | 7.13E-19 | C4orf46  | 1.10772  | 8.621215 | 1.59E-15 |
| PPP1R1A   | -1.11424 | -8.98797 | 1.45E-16 | CDC45    | 1.107837 | 7.631832 | 7.88E-13 |
| PAQR5     | -1.11542 | -5.03596 | 1.02E-06 | LGALS3BP | 1.108123 | 9.757831 | 8.43E-19 |
| SLK       | -1.11557 | -13.4305 | 3.99E-30 | MXRA8    | 1.109951 | 5.461149 | 1.32E-07 |
| FCHO2     | -1.11899 | -12.6664 | 1.02E-27 | MSRB1    | 1.112294 | 8.455809 | 4.59E-15 |
| DENND2C   | -1.11911 | -6.61658 | 2.98E-10 | CHSY1    | 1.112463 | 10.9697  | 1.91E-22 |
| AF289551  | -1.11965 | -9.33051 | 1.50E-17 | LY96     | 1.113748 | 7.211602 | 9.75E-12 |
| MDFIC     | -1.12002 | -12.2891 | 1.56E-26 | SLAMF7   | 1.115761 | 4.590669 | 7.59E-06 |

|           |          |          |          |           |          |          |          |
|-----------|----------|----------|----------|-----------|----------|----------|----------|
| AKTIP     | -1.1208  | -13.4374 | 3.80E-30 | WFDC5     | 1.117639 | 3.700292 | 0.000275 |
| TECR      | -1.12146 | -10.1197 | 7.11E-20 | FAM83A    | 1.118051 | 4.560291 | 8.66E-06 |
| LINC01405 | -1.122   | -4.58234 | 7.87E-06 | FADS3     | 1.118118 | 5.604763 | 6.48E-08 |
| FAM219B   | -1.12704 | -15.752  | 1.80E-37 | FMNL2     | 1.121207 | 10.5296  | 4.17E-21 |
| ZNF519    | -1.12905 | -13.747  | 3.98E-31 | COL18A1   | 1.123797 | 8.482509 | 3.87E-15 |
| MBOAT2    | -1.12913 | -6.33806 | 1.39E-09 | LOC100507 | 1.125413 | 6.830325 | 8.90E-11 |
| VAT1      | -1.13078 | -8.88622 | 2.83E-16 | KIF18A    | 1.125447 | 7.971794 | 9.74E-14 |
| FOLR1     | -1.13201 | -3.836   | 0.000165 | C1QA      | 1.125902 | 5.83521  | 2.00E-08 |
| FIG4      | -1.13579 | -14.3052 | 6.79E-33 | OLR1      | 1.12706  | 4.978296 | 1.33E-06 |
| RDH12     | -1.13627 | -3.21031 | 0.001533 | KIF23     | 1.129292 | 7.923109 | 1.32E-13 |
| ALDH3B2   | -1.13739 | -4.4371  | 1.47E-05 | RRAS2     | 1.129341 | 7.62461  | 8.23E-13 |
| PLCD1     | -1.13823 | -8.62072 | 1.59E-15 | SLC25A32  | 1.129545 | 11.26666 | 2.34E-23 |
| ITM2A     | -1.13946 | -5.46129 | 1.32E-07 | THBD      | 1.130997 | 5.71611  | 3.69E-08 |
| BBOX1     | -1.141   | -3.63171 | 0.000354 | NPTX2     | 1.131319 | 5.265911 | 3.43E-07 |
| AC007292  | -1.14474 | -13.5884 | 1.26E-30 | CSGALNAC  | 1.13147  | 11.33807 | 1.41E-23 |
| ALAD      | -1.14595 | -12.9887 | 9.91E-29 | LBH       | 1.13183  | 6.095073 | 5.13E-09 |
| DGAT2     | -1.14608 | -5.10315 | 7.44E-07 | MYH9      | 1.132549 | 12.21529 | 2.66E-26 |
| SYTL4     | -1.1464  | -14.3537 | 4.77E-33 | ARNTL     | 1.133428 | 8.117442 | 3.92E-14 |
| KIF1C     | -1.15087 | -11.0002 | 1.54E-22 | TFPI2     | 1.133618 | 3.731905 | 0.000244 |
| GYS2      | -1.15111 | -8.21034 | 2.18E-14 | PIM2      | 1.133954 | 5.306978 | 2.81E-07 |
| TPRN      | -1.15129 | -13.6478 | 8.21E-31 | BLM       | 1.134103 | 6.868205 | 7.17E-11 |
| ZDHH13    | -1.15186 | -10.354  | 1.41E-20 | IGLV1-44  | 1.137025 | 3.833317 | 0.000167 |
| BEX2      | -1.1552  | -4.29193 | 2.70E-05 | GTSF1     | 1.137858 | 3.265199 | 0.001276 |
| ITPR2     | -1.15522 | -12.2734 | 1.75E-26 | TPSB2     | 1.137955 | 4.524882 | 1.01E-05 |
| PLA2G4A   | -1.15525 | -4.63768 | 6.18E-06 | SCG2      | 1.140518 | 5.219137 | 4.29E-07 |
| TMOD1     | -1.15572 | -6.47757 | 6.46E-10 | FGD6      | 1.140575 | 10.3643  | 1.31E-20 |
| ZFAND2B   | -1.1564  | -14.2102 | 1.36E-32 | HLA-C     | 1.141391 | 11.50028 | 4.46E-24 |
| SUOX      | -1.1572  | -12.5181 | 3.00E-27 | STARD3NL  | 1.143483 | 9.395781 | 9.69E-18 |
| ATP10B    | -1.158   | -7.82003 | 2.49E-13 | ARTN      | 1.144642 | 7.120464 | 1.66E-11 |
| AIM1L     | -1.15841 | -10.0165 | 1.44E-19 | EGLN3     | 1.145058 | 5.180497 | 5.16E-07 |
| DEPTOR    | -1.16062 | -9.40588 | 9.06E-18 | CDKN3     | 1.145346 | 6.658617 | 2.35E-10 |
| GSTA1     | -1.16184 | -5.92024 | 1.29E-08 | NRG1      | 1.147162 | 8.36381  | 8.26E-15 |
| S100A16   | -1.1621  | -10.1973 | 4.17E-20 | RBP1      | 1.148824 | 8.404389 | 6.38E-15 |
| LOC285556 | -1.16254 | -4.61321 | 6.88E-06 | MAD2L2    | 1.151068 | 11.11066 | 7.07E-23 |
| MLIP      | -1.16397 | -5.89597 | 1.46E-08 | MYH10     | 1.15147  | 5.505363 | 1.06E-07 |
| SLC9A3R1  | -1.16533 | -7.95614 | 1.07E-13 | LILRB2    | 1.152643 | 6.988545 | 3.59E-11 |
| AOX1      | -1.16591 | -6.36031 | 1.23E-09 | STARD4    | 1.155483 | 7.091061 | 1.98E-11 |
| SPTBN2    | -1.16629 | -9.50678 | 4.60E-18 | IQCG      | 1.155556 | 7.041266 | 2.64E-11 |
| EBF1      | -1.16767 | -7.13586 | 1.52E-11 | GALNT18   | 1.15565  | 12.52504 | 2.85E-27 |
| PRIMA1    | -1.1682  | -5.59853 | 6.69E-08 | FCGR2A    | 1.156317 | 14.52596 | 1.36E-33 |
| LRBA      | -1.1683  | -10.9798 | 1.78E-22 | SSFA2     | 1.157813 | 8.372772 | 7.80E-15 |
| ATP2A1    | -1.1696  | -7.22289 | 9.12E-12 | FBXO45    | 1.158873 | 9.535668 | 3.79E-18 |
| NRAP      | -1.17027 | -5.76859 | 2.82E-08 | VANGL2    | 1.159072 | 7.254602 | 7.57E-12 |
| DUSP13    | -1.1753  | -7.23116 | 8.69E-12 | HIST1H2BK | 1.161462 | 7.2281   | 8.85E-12 |
| SDR16C5   | -1.17612 | -5.95091 | 1.10E-08 | SCRN1     | 1.161484 | 8.164432 | 2.92E-14 |
| ACOX2     | -1.17742 | -10.1661 | 5.16E-20 | PXN       | 1.162438 | 8.555756 | 2.42E-15 |
| LIFR      | -1.1776  | -8.87904 | 2.97E-16 | IFI16     | 1.162457 | 12.95864 | 1.23E-28 |

|           |          |          |          |           |          |          |          |
|-----------|----------|----------|----------|-----------|----------|----------|----------|
| ACTN2     | -1.1798  | -3.60315 | 0.000392 | KIF2C     | 1.165444 | 7.157717 | 1.34E-11 |
| SH2D4A    | -1.18164 | -7.43526 | 2.58E-12 | CD14      | 1.165788 | 8.906981 | 2.47E-16 |
| NTN4      | -1.18202 | -7.39394 | 3.30E-12 | SLFN5     | 1.166818 | 8.357601 | 8.59E-15 |
| LOC102724 | -1.18303 | -10.1268 | 6.77E-20 | ACVR1C    | 1.166998 | 6.470415 | 6.72E-10 |
| GPRASP1   | -1.18401 | -9.69947 | 1.25E-18 | NUDT11    | 1.168649 | 5.691824 | 4.17E-08 |
| MYO6      | -1.18402 | -9.15572 | 4.80E-17 | ENO2      | 1.169434 | 5.705149 | 3.90E-08 |
| OPLAH     | -1.18405 | -8.95066 | 1.85E-16 | KANK4     | 1.174815 | 4.015364 | 8.25E-05 |
| FAM83D    | -1.18454 | -6.29194 | 1.78E-09 | WDR72     | 1.177139 | 5.972246 | 9.82E-09 |
| PLAC9     | -1.18786 | -10.3224 | 1.75E-20 | XPR1      | 1.179038 | 12.06782 | 7.69E-26 |
| PLBD1     | -1.19002 | -6.47176 | 6.67E-10 | GPR183    | 1.179401 | 5.655257 | 5.02E-08 |
| CHP1      | -1.19014 | -12.6962 | 8.26E-28 | BATF2     | 1.180158 | 5.358891 | 2.19E-07 |
| MYL5      | -1.19118 | -10.1806 | 4.67E-20 | SQLE      | 1.181644 | 7.095977 | 1.92E-11 |
| GOT1      | -1.19302 | -10.5192 | 4.48E-21 | AQP9      | 1.181882 | 5.067128 | 8.81E-07 |
| PEBP4     | -1.19374 | -7.32869 | 4.88E-12 | CDCA8     | 1.184823 | 7.764758 | 3.50E-13 |
| GLIDR     | -1.19825 | -10.0391 | 1.24E-19 | MX2       | 1.185075 | 4.748503 | 3.78E-06 |
| CYSLTR1   | -1.19856 | -10.4884 | 5.55E-21 | HSPH1     | 1.187209 | 9.32136  | 1.59E-17 |
| NFIA      | -1.20032 | -11.9507 | 1.78E-25 | HCP5      | 1.188227 | 6.708031 | 1.78E-10 |
| SLITRK5   | -1.20754 | -12.1691 | 3.71E-26 | MAGEA12   | 1.190917 | 3.272315 | 0.001246 |
| SLC16A9   | -1.20761 | -4.58581 | 7.75E-06 | ANGPTL2   | 1.195401 | 6.424488 | 8.65E-10 |
| EIF4E3    | -1.21215 | -12.6386 | 1.25E-27 | GPR68     | 1.196673 | 10.89245 | 3.29E-22 |
| BLVRB     | -1.21347 | -10.777  | 7.40E-22 | IFITM2    | 1.198775 | 10.62478 | 2.15E-21 |
| BCL11A    | -1.21395 | -6.24194 | 2.34E-09 | CALB1     | 1.200144 | 3.43134  | 0.000723 |
| IKZF2     | -1.21551 | -14.3157 | 6.29E-33 | MYBL2     | 1.202481 | 8.2579   | 1.62E-14 |
| COLCA2    | -1.21903 | -5.33999 | 2.40E-07 | FADD      | 1.202711 | 6.270907 | 2.00E-09 |
| CHPT1     | -1.21912 | -5.9357  | 1.19E-08 | LOC440173 | 1.202736 | 5.723853 | 3.55E-08 |
| ITLN1     | -1.21991 | -4.67416 | 5.26E-06 | GFPT2     | 1.203384 | 5.483587 | 1.19E-07 |
| ABHD14B   | -1.21999 | -8.91816 | 2.30E-16 | SLC52A2   | 1.204075 | 9.615335 | 2.21E-18 |
| RMND5B    | -1.22032 | -13.4142 | 4.50E-30 | CCDC102B  | 1.2041   | 8.332754 | 1.01E-14 |
| OBFC1     | -1.22105 | -17.973  | 2.03E-44 | MCAM      | 1.2047   | 9.470866 | 5.86E-18 |
| ANG       | -1.22146 | -6.37244 | 1.15E-09 | PLEC      | 1.205987 | 8.641821 | 1.39E-15 |
| SCGB1D2   | -1.22167 | -6.55484 | 4.21E-10 | CPA3      | 1.206323 | 5.164294 | 5.57E-07 |
| PTGR1     | -1.22645 | -6.91292 | 5.55E-11 | ADA       | 1.208557 | 8.420597 | 5.75E-15 |
| GSTA4     | -1.23072 | -6.33595 | 1.40E-09 | CDKN1A    | 1.209345 | 8.699322 | 9.56E-16 |
| DDIT4L    | -1.23506 | -4.08833 | 6.18E-05 | LOC284215 | 1.211045 | 8.461683 | 4.42E-15 |
| TMPRSS4   | -1.23546 | -5.24577 | 3.78E-07 | LCE2B     | 1.211109 | 3.403931 | 0.000795 |
| RNF128    | -1.23752 | -3.82312 | 0.000173 | PCDH7     | 1.211224 | 6.837541 | 8.54E-11 |
| FUT2      | -1.23818 | -7.8755  | 1.77E-13 | CCDC86    | 1.211366 | 9.195999 | 3.67E-17 |
| ACVR2A    | -1.239   | -9.48121 | 5.46E-18 | TGFB1     | 1.211948 | 14.08975 | 3.27E-32 |
| EFHD1     | -1.23914 | -7.68522 | 5.69E-13 | ITGB4     | 1.212414 | 12.14005 | 4.57E-26 |
| DANCR     | -1.24081 | -7.27228 | 6.81E-12 | H2BFS     | 1.212909 | 7.068182 | 2.26E-11 |
| TMEM38A   | -1.24126 | -7.15545 | 1.36E-11 | ANLN      | 1.213677 | 6.31829  | 1.55E-09 |
| MLPH      | -1.24254 | -4.66578 | 5.46E-06 | MELK      | 1.214004 | 8.088861 | 4.69E-14 |
| HMGCS1    | -1.24266 | -7.4695  | 2.10E-12 | LOXL1     | 1.214575 | 6.011853 | 7.97E-09 |
| TRDN      | -1.24267 | -4.33611 | 2.25E-05 | IGHM      | 1.215281 | 3.547773 | 0.000479 |
| C19orf33  | -1.24507 | -5.98046 | 9.41E-09 | PDE4B     | 1.216949 | 7.275666 | 6.68E-12 |
| KLHDC8A   | -1.2461  | -10.7947 | 6.54E-22 | GPX7      | 1.217975 | 6.148862 | 3.85E-09 |
| CRYL1     | -1.25034 | -9.94908 | 2.29E-19 | GALNT2    | 1.218742 | 12.15356 | 4.15E-26 |

|           |          |          |          |          |          |          |          |
|-----------|----------|----------|----------|----------|----------|----------|----------|
| DUOX1     | -1.25397 | -9.25748 | 2.44E-17 | SOCS3    | 1.219482 | 12.62482 | 1.38E-27 |
| DCXR      | -1.25403 | -11.2722 | 2.25E-23 | MT2A     | 1.219696 | 7.489639 | 1.86E-12 |
| AIFM2     | -1.25546 | -11.37   | 1.13E-23 | TTPAL    | 1.220114 | 9.878504 | 3.71E-19 |
| SLC2A12   | -1.25853 | -7.35461 | 4.18E-12 | ZNF532   | 1.223629 | 12.13546 | 4.73E-26 |
| SPAG1     | -1.25893 | -8.09515 | 4.51E-14 | LOXL2    | 1.224624 | 15.1161  | 1.84E-35 |
| PIGN      | -1.25924 | -9.19127 | 3.79E-17 | BIRC5    | 1.228693 | 8.617912 | 1.62E-15 |
| CIPC      | -1.25952 | -12.309  | 1.35E-26 | ACSL4    | 1.228778 | 11.3288  | 1.51E-23 |
| RHBDL2    | -1.26252 | -8.31569 | 1.12E-14 | ATP2C1   | 1.229118 | 15.01305 | 3.89E-35 |
| TCN1      | -1.26483 | -2.37898 | 0.018253 | PRSS23   | 1.230846 | 8.290393 | 1.32E-14 |
| UNC13B    | -1.26663 | -9.02955 | 1.10E-16 | CXCL14   | 1.231832 | 4.684523 | 5.03E-06 |
| IVL       | -1.26747 | -4.1919  | 4.07E-05 | GZMA     | 1.23582  | 4.169599 | 4.46E-05 |
| VPS37B    | -1.26795 | -11.8639 | 3.32E-25 | IKBIP    | 1.237992 | 11.80526 | 5.05E-25 |
| ASAP3     | -1.26796 | -9.78602 | 6.96E-19 | PCDH17   | 1.243085 | 8.634712 | 1.45E-15 |
| CEL       | -1.2683  | -5.36861 | 2.09E-07 | CLMP     | 1.243923 | 5.732816 | 3.39E-08 |
| MYOM1     | -1.26845 | -6.10895 | 4.77E-09 | MET      | 1.245985 | 8.070325 | 5.27E-14 |
| DCT       | -1.27071 | -9.08606 | 7.60E-17 | ELAVL2   | 1.247675 | 5.597972 | 6.70E-08 |
| ZBTB7C    | -1.27075 | -10.4743 | 6.12E-21 | SMTN     | 1.252323 | 9.210511 | 3.33E-17 |
| SECISBP2L | -1.27226 | -12.7651 | 5.01E-28 | IGLL3P   | 1.253665 | 4.317191 | 2.43E-05 |
| KIAA1468  | -1.27408 | -10.5864 | 2.80E-21 | CSPG4    | 1.256338 | 6.794518 | 1.09E-10 |
| TMEM80    | -1.2755  | -11.3876 | 9.94E-24 | STC1     | 1.256636 | 5.954998 | 1.07E-08 |
| PCOLCE2   | -1.27607 | -5.30184 | 2.88E-07 | ZNF281   | 1.256811 | 10.66425 | 1.63E-21 |
| TMC4      | -1.27941 | -5.30017 | 2.91E-07 | AFAP1L2  | 1.257407 | 7.09194  | 1.97E-11 |
| LRRC37A4F | -1.27977 | -9.88775 | 3.48E-19 | HOXC10   | 1.257442 | 6.251066 | 2.23E-09 |
| FGFBP1    | -1.28072 | -5.73221 | 3.40E-08 | PCOLCE   | 1.26078  | 5.843963 | 1.91E-08 |
| JAM2      | -1.28107 | -7.23247 | 8.62E-12 | TP63     | 1.263154 | 7.799102 | 2.83E-13 |
| TRNP1     | -1.28236 | -10.2421 | 3.06E-20 | CD274    | 1.263474 | 6.603744 | 3.20E-10 |
| KCNT2     | -1.28394 | -9.54223 | 3.62E-18 | LAMC1    | 1.268157 | 11.59978 | 2.19E-24 |
| ZNF431    | -1.28465 | -11.5957 | 2.26E-24 | OAS3     | 1.26858  | 8.131349 | 3.59E-14 |
| CSRP3     | -1.28773 | -2.52096 | 0.012443 | CARD18   | 1.269936 | 4.040597 | 7.47E-05 |
| TMEM154   | -1.28978 | -7.97634 | 9.47E-14 | ADAMTS12 | 1.27212  | 10.24937 | 2.91E-20 |
| PRB3      | -1.29138 | -4.30125 | 2.60E-05 | RFC4     | 1.273617 | 9.043056 | 1.01E-16 |
| LYPD3     | -1.29275 | -5.87562 | 1.63E-08 | SLC38A6  | 1.276062 | 9.988211 | 1.75E-19 |
| PPFIBP2   | -1.29278 | -7.89129 | 1.60E-13 | KNSTRN   | 1.276208 | 10.2654  | 2.60E-20 |
| NT5C2     | -1.29477 | -14.3269 | 5.80E-33 | GAS1     | 1.278072 | 7.294813 | 5.96E-12 |
| RHOV      | -1.29544 | -7.00227 | 3.31E-11 | PPP1R18  | 1.279179 | 9.792227 | 6.67E-19 |
| STRADB    | -1.29823 | -14.7787 | 2.15E-34 | TGIF1    | 1.281007 | 14.33302 | 5.55E-33 |
| C18orf25  | -1.29946 | -16.1893 | 7.52E-39 | PCDHB14  | 1.281468 | 6.89214  | 6.25E-11 |
| SLC27A2   | -1.30302 | -8.60528 | 1.76E-15 | CDC20    | 1.282289 | 7.68556  | 5.68E-13 |
| ADIPOQ    | -1.30356 | -6.2331  | 2.45E-09 | KYNU     | 1.285506 | 6.375886 | 1.13E-09 |
| AIM1      | -1.30487 | -11.2818 | 2.11E-23 | IGLJ3    | 1.286514 | 4.964408 | 1.42E-06 |
| CHAC1     | -1.30545 | -7.82896 | 2.36E-13 | CALD1    | 1.287277 | 8.378775 | 7.51E-15 |
| OSR1      | -1.30898 | -9.29952 | 1.84E-17 | GLIPR1   | 1.287495 | 8.682315 | 1.07E-15 |
| OGFRL1    | -1.30949 | -9.65813 | 1.66E-18 | KLF10    | 1.288402 | 12.41374 | 6.36E-27 |
| LOC101927 | -1.31368 | -11.9321 | 2.04E-25 | SNAPC1   | 1.288586 | 9.054602 | 9.36E-17 |
| EEF1A2    | -1.31739 | -4.84731 | 2.42E-06 | STAT4    | 1.289728 | 5.708514 | 3.83E-08 |
| USP54     | -1.31836 | -9.41027 | 8.79E-18 | SLC20A1  | 1.290673 | 10.37777 | 1.20E-20 |
| ZNF844    | -1.32194 | -16.9    | 4.43E-41 | TMEM184f | 1.291983 | 16.51797 | 6.97E-40 |

|           |          |          |          |           |          |          |          |
|-----------|----------|----------|----------|-----------|----------|----------|----------|
| LOC101927 | -1.32396 | -10.7315 | 1.02E-21 | SLC39A4   | 1.292246 | 6.679595 | 2.09E-10 |
| GPR64     | -1.32453 | -7.41024 | 3.00E-12 | LEMD1     | 1.294781 | 5.422825 | 1.60E-07 |
| NAGK      | -1.32708 | -13.5511 | 1.66E-30 | PRNP      | 1.295002 | 10.72884 | 1.04E-21 |
| MFSD6     | -1.32715 | -9.59894 | 2.47E-18 | IFIT2     | 1.296828 | 5.495131 | 1.12E-07 |
| CHCHD10   | -1.32882 | -9.24248 | 2.70E-17 | PPFIA1    | 1.297168 | 6.424274 | 8.66E-10 |
| DEGS2     | -1.32901 | -8.18259 | 2.60E-14 | GOS2      | 1.297852 | 4.552101 | 8.97E-06 |
| TMEM254   | -1.33296 | -10.5185 | 4.50E-21 | SIRPA     | 1.299753 | 12.9556  | 1.26E-28 |
| TJP1      | -1.33332 | -13.315  | 9.25E-30 | CD163     | 1.302645 | 6.449432 | 7.54E-10 |
| ERMP1     | -1.33406 | -7.82678 | 2.39E-13 | SPOCK1    | 1.305253 | 4.038927 | 7.52E-05 |
| EPN3      | -1.33599 | -7.9328  | 1.24E-13 | MCM2      | 1.308763 | 7.647301 | 7.17E-13 |
| P2RY2     | -1.33652 | -6.19019 | 3.09E-09 | PLK1      | 1.313342 | 7.42428  | 2.76E-12 |
| TPD52L1   | -1.33905 | -7.51786 | 1.57E-12 | KRTDAP    | 1.317675 | 2.476724 | 0.014046 |
| ANXA1     | -1.3398  | -7.05301 | 2.47E-11 | ATP13A3   | 1.319076 | 11.50161 | 4.42E-24 |
| AQP5      | -1.3398  | -5.57137 | 7.66E-08 | FHOD3     | 1.319398 | 5.534306 | 9.22E-08 |
| PHC1      | -1.34168 | -13.2482 | 1.50E-29 | STRIP2    | 1.32409  | 6.795716 | 1.08E-10 |
| FXYD6     | -1.34495 | -6.10141 | 4.96E-09 | AP2B1     | 1.326988 | 10.79202 | 6.66E-22 |
| EMCN      | -1.34654 | -8.02686 | 6.91E-14 | PI15      | 1.329269 | 8.808394 | 4.70E-16 |
| RAB11A    | -1.34821 | -15.3349 | 3.73E-36 | NRIP3     | 1.331279 | 7.898053 | 1.54E-13 |
| VSIG2     | -1.34923 | -12.5926 | 1.75E-27 | HLA-B     | 1.331462 | 11.79931 | 5.27E-25 |
| KIAA0232  | -1.35216 | -14.9555 | 5.92E-35 | RPL39L    | 1.331768 | 5.805179 | 2.34E-08 |
| NEB       | -1.35301 | -4.0549  | 7.06E-05 | COL5A3    | 1.333808 | 7.25389  | 7.60E-12 |
| ABCA8     | -1.35506 | -12.2702 | 1.79E-26 | AMIGO2    | 1.336661 | 6.252521 | 2.21E-09 |
| GLTP      | -1.3589  | -8.10706 | 4.18E-14 | MICALCL   | 1.337865 | 6.849508 | 7.98E-11 |
| FMO1      | -1.35924 | -4.61543 | 6.81E-06 | ABL2      | 1.339295 | 12.61493 | 1.49E-27 |
| EPS8L2    | -1.36191 | -13.6773 | 6.62E-31 | NMB       | 1.339596 | 7.416042 | 2.90E-12 |
| LLGL2     | -1.36308 | -12.691  | 8.58E-28 | SH2D5     | 1.340571 | 5.757241 | 2.99E-08 |
| DQ592442  | -1.36312 | -7.91909 | 1.35E-13 | TPX2      | 1.340885 | 8.281534 | 1.39E-14 |
| RP11-532F | -1.36774 | -9.02093 | 1.17E-16 | NAV1      | 1.341428 | 11.48481 | 4.98E-24 |
| SYNGR1    | -1.36914 | -15.1184 | 1.81E-35 | CXCL16    | 1.346853 | 9.41223  | 8.68E-18 |
| SMPD2     | -1.37413 | -14.769  | 2.31E-34 | CHPF2     | 1.349077 | 14.62903 | 6.40E-34 |
| TMEM125   | -1.37881 | -9.31918 | 1.62E-17 | COL4A6    | 1.349693 | 8.667402 | 1.18E-15 |
| ADRA2A    | -1.37933 | -5.3482  | 2.30E-07 | APOE      | 1.350746 | 6.666465 | 2.25E-10 |
| LOC28307C | -1.38102 | -9.2618  | 2.37E-17 | COL27A1   | 1.352604 | 14.59696 | 8.09E-34 |
| GFOD2     | -1.3825  | -12.8759 | 2.25E-28 | RP4-781L3 | 1.35527  | 11.8189  | 4.58E-25 |
| NOSTRIN   | -1.38464 | -7.96975 | 9.86E-14 | HMGB3     | 1.358666 | 10.86051 | 4.12E-22 |
| CHST9     | -1.38496 | -5.51002 | 1.04E-07 | SLC7A8    | 1.359784 | 7.231942 | 8.65E-12 |
| LOC101928 | -1.38542 | -11.9022 | 2.52E-25 | HCK       | 1.360398 | 8.312405 | 1.15E-14 |
| CD24      | -1.38656 | -9.10984 | 6.50E-17 | CD86      | 1.361734 | 9.105992 | 6.67E-17 |
| IL17D     | -1.38669 | -9.00916 | 1.26E-16 | SPAG4     | 1.363459 | 5.354107 | 2.24E-07 |
| AK055981  | -1.38715 | -10.307  | 1.95E-20 | GUCY1B3   | 1.363766 | 7.709592 | 4.90E-13 |
| ZNF662    | -1.38994 | -10.5864 | 2.80E-21 | SHC1      | 1.368598 | 12.82293 | 3.30E-28 |
| MYO5B     | -1.39092 | -12.0534 | 8.53E-26 | SMAD7     | 1.371364 | 12.13855 | 4.62E-26 |
| PHACTR4   | -1.39216 | -13.2295 | 1.72E-29 | LOC100132 | 1.371807 | 7.077385 | 2.14E-11 |
| FAM107A   | -1.39407 | -8.23925 | 1.82E-14 | GPR171    | 1.371971 | 4.862729 | 2.26E-06 |
| AOC3      | -1.39607 | -6.94764 | 4.54E-11 | MICB      | 1.373118 | 7.079882 | 2.11E-11 |
| TSPAN7    | -1.39848 | -4.95585 | 1.48E-06 | KRT6B     | 1.378892 | 7.621393 | 8.39E-13 |
| ADIRF     | -1.39865 | -6.68763 | 2.00E-10 | CEBPD     | 1.37951  | 11.76774 | 6.61E-25 |



|            |          |          |          |           |          |          |          |
|------------|----------|----------|----------|-----------|----------|----------|----------|
| TTN        | -1.39906 | -5.14013 | 6.25E-07 | HAS3      | 1.381617 | 10.01238 | 1.48E-19 |
| TOX3       | -1.40116 | -6.45778 | 7.20E-10 | NOX4      | 1.385564 | 10.36414 | 1.31E-20 |
| CGN        | -1.40132 | -10.0242 | 1.37E-19 | SLC15A3   | 1.385762 | 8.726763 | 8.00E-16 |
| ENO3       | -1.40193 | -7.24155 | 8.17E-12 | COL6A2    | 1.386011 | 7.856688 | 1.99E-13 |
| C8orf22    | -1.40202 | -7.64788 | 7.15E-13 | ADM       | 1.386268 | 8.538605 | 2.70E-15 |
| PTGDS      | -1.40583 | -5.93336 | 1.20E-08 | TNFSF4    | 1.386605 | 6.568614 | 3.90E-10 |
| GPR133     | -1.40608 | -11.1696 | 4.66E-23 | LRRC8E    | 1.387637 | 7.527342 | 1.48E-12 |
| CMYA5      | -1.41082 | -4.36194 | 2.02E-05 | CHST2     | 1.390837 | 12.22803 | 2.43E-26 |
| RCAN2      | -1.41232 | -6.97339 | 3.91E-11 | PRTFDC1   | 1.394627 | 8.465242 | 4.32E-15 |
| SMTNL1     | -1.41277 | -7.04506 | 2.58E-11 | CNTNAP2   | 1.395491 | 6.24032  | 2.36E-09 |
| RP11-250B  | -1.41281 | -14.6931 | 4.01E-34 | TMEM2     | 1.396475 | 9.703029 | 1.22E-18 |
| COX6A2     | -1.41709 | -6.47991 | 6.37E-10 | PDGFRB    | 1.396751 | 9.356358 | 1.26E-17 |
| ABI3BP     | -1.41725 | -10.4133 | 9.35E-21 | F2RL1     | 1.396778 | 6.002843 | 8.36E-09 |
| FAAH2      | -1.41794 | -8.92018 | 2.27E-16 | HOXD10    | 1.397489 | 9.159693 | 4.67E-17 |
| SYNM       | -1.4204  | -6.10156 | 4.96E-09 | VEGFC     | 1.406244 | 5.186504 | 5.01E-07 |
| ARHGEF26   | -1.42145 | -9.14779 | 5.05E-17 | UBE2C     | 1.406862 | 10.25431 | 2.81E-20 |
| KLF8       | -1.42276 | -12.8892 | 2.04E-28 | IL15RA    | 1.410406 | 9.732374 | 1.00E-18 |
| ALDH9A1    | -1.42287 | -13.1371 | 3.37E-29 | DTL       | 1.41108  | 8.818308 | 4.41E-16 |
| PLAGL1     | -1.43973 | -8.69175 | 1.00E-15 | CYTIP     | 1.411141 | 5.924821 | 1.26E-08 |
| C4orf19    | -1.43989 | -7.69683 | 5.30E-13 | PRKCDBP   | 1.411437 | 7.825043 | 2.42E-13 |
| PROM1      | -1.44185 | -3.19619 | 0.001606 | CKAP2L    | 1.414784 | 8.42727  | 5.51E-15 |
| TMEM184/   | -1.44326 | -12.4306 | 5.63E-27 | TNFSF13B  | 1.417281 | 6.102909 | 4.92E-09 |
| ZNF273     | -1.44638 | -11.9741 | 1.51E-25 | KIAA1644  | 1.418096 | 7.357223 | 4.11E-12 |
| RP11-96D1  | -1.44863 | -9.29141 | 1.95E-17 | DDIT4     | 1.420046 | 8.320949 | 1.08E-14 |
| GULP1      | -1.4501  | -10.2858 | 2.26E-20 | SLC7A11   | 1.42049  | 5.811889 | 2.26E-08 |
| DHRS1      | -1.45019 | -8.97216 | 1.61E-16 | TRAM2     | 1.421274 | 15.79653 | 1.30E-37 |
| DDAH2      | -1.45039 | -11.8958 | 2.64E-25 | IGLL5     | 1.423029 | 3.697721 | 0.000277 |
| SMPX       | -1.45082 | -2.98796 | 0.003141 | C11orf96  | 1.423861 | 6.154711 | 3.74E-09 |
| TCEAL2     | -1.45211 | -8.10223 | 4.31E-14 | BCAT1     | 1.425045 | 7.148008 | 1.42E-11 |
| ARHGEF10/  | -1.45246 | -14.7618 | 2.43E-34 | IRF7      | 1.426191 | 8.078333 | 5.01E-14 |
| STRBP      | -1.45267 | -10.2453 | 2.99E-20 | IRF9      | 1.427354 | 12.5924  | 1.75E-27 |
| ULK3       | -1.4537  | -9.88204 | 3.62E-19 | TPBG      | 1.427821 | 12.03831 | 9.50E-26 |
| RERGL      | -1.45375 | -12.9332 | 1.48E-28 | LINC01094 | 1.429441 | 8.738152 | 7.43E-16 |
| RANBP9     | -1.45533 | -14.8408 | 1.37E-34 | FSTL3     | 1.432644 | 5.914076 | 1.33E-08 |
| GAS7       | -1.45666 | -11.3971 | 9.29E-24 | ZNF469    | 1.435372 | 9.52684  | 4.02E-18 |
| RP11-680F/ | -1.45876 | -10.3852 | 1.14E-20 | COL4A5    | 1.435983 | 11.77664 | 6.20E-25 |
| INMT       | -1.45883 | -12.2615 | 1.91E-26 | MS4A7     | 1.438147 | 8.700402 | 9.50E-16 |
| RAB11FIP1  | -1.45907 | -10.2898 | 2.20E-20 | COLGALT1  | 1.439199 | 15.94609 | 4.39E-38 |
| ACADSB     | -1.45923 | -11.2605 | 2.45E-23 | FAM101B   | 1.445945 | 8.529054 | 2.87E-15 |
| BPIFA1     | -1.46037 | -2.83099 | 0.005089 | SFRP2     | 1.451218 | 4.308868 | 2.52E-05 |
| LRRK2      | -1.46072 | -9.55007 | 3.44E-18 | GEM       | 1.451332 | 7.609811 | 9.01E-13 |
| SPINT1     | -1.4614  | -13.0476 | 6.46E-29 | TYROBP    | 1.451486 | 9.710089 | 1.17E-18 |
| SPRR2C     | -1.46206 | -3.23649 | 0.001405 | RELB      | 1.452089 | 8.985104 | 1.48E-16 |
| UPK3B      | -1.46227 | -12.0014 | 1.24E-25 | MIAT      | 1.458469 | 7.526539 | 1.49E-12 |
| CPPED1     | -1.46941 | -18.1954 | 4.18E-45 | MLF1      | 1.45948  | 5.920128 | 1.29E-08 |
| TST        | -1.47022 | -9.49121 | 5.11E-18 | GPR176    | 1.461545 | 11.16236 | 4.91E-23 |
| TMEM120/   | -1.47195 | -13.5375 | 1.83E-30 | FLNA      | 1.461798 | 12.1344  | 4.76E-26 |

|           |          |          |          |           |          |          |          |
|-----------|----------|----------|----------|-----------|----------|----------|----------|
| S100P     | -1.47483 | -4.19904 | 3.95E-05 | PDGFC     | 1.467274 | 7.233009 | 8.59E-12 |
| FLG-AS1   | -1.47917 | -18.6557 | 1.60E-46 | DDX58     | 1.467914 | 8.107444 | 4.17E-14 |
| KRT80     | -1.48007 | -5.43348 | 1.52E-07 | EVA1A     | 1.468623 | 5.634905 | 5.57E-08 |
| XIRP2     | -1.48728 | -2.90667 | 0.004043 | CCL2      | 1.47203  | 6.543678 | 4.48E-10 |
| FCER1A    | -1.4898  | -11.3101 | 1.72E-23 | LEPRE1    | 1.472772 | 9.710964 | 1.16E-18 |
| TOM1      | -1.49087 | -10.8215 | 5.42E-22 | LINC01116 | 1.472863 | 7.357533 | 4.11E-12 |
| C1QTNF7   | -1.49265 | -15.1008 | 2.05E-35 | IGK       | 1.475306 | 4.355064 | 2.08E-05 |
| ACOX3     | -1.49813 | -14.2385 | 1.11E-32 | ACP5      | 1.475469 | 8.507267 | 3.30E-15 |
| TRIM6     | -1.49971 | -9.82314 | 5.41E-19 | C6orf141  | 1.477146 | 7.450225 | 2.36E-12 |
| PPCDC     | -1.50194 | -14.2968 | 7.22E-33 | CCR1      | 1.477403 | 7.827687 | 2.38E-13 |
| SIM2      | -1.50316 | -10.2827 | 2.31E-20 | CDC42EP3  | 1.477982 | 9.153067 | 4.88E-17 |
| KRT19     | -1.50535 | -5.06235 | 9.01E-07 | LIPG      | 1.478321 | 6.078083 | 5.62E-09 |
| PITX2     | -1.5087  | -4.87098 | 2.18E-06 | SPRY4     | 1.480988 | 8.910605 | 2.41E-16 |
| TMEM246   | -1.51076 | -8.20612 | 2.24E-14 | PTX3      | 1.481016 | 5.168455 | 5.46E-07 |
| LRG1      | -1.51155 | -6.03218 | 7.16E-09 | LRRC8D    | 1.48206  | 13.32896 | 8.36E-30 |
| CRABP2    | -1.51165 | -6.46284 | 7.00E-10 | NTS       | 1.484218 | 2.748281 | 0.00651  |
| FAM129B   | -1.51592 | -14.1835 | 1.65E-32 | KLF7      | 1.4868   | 10.63525 | 1.99E-21 |
| IL33      | -1.51959 | -5.53589 | 9.14E-08 | STEAP1B   | 1.488068 | 5.298796 | 2.93E-07 |
| NEBL      | -1.52004 | -13.0326 | 7.20E-29 | FPR1      | 1.489912 | 9.289586 | 1.97E-17 |
| PBX1      | -1.5202  | -8.60655 | 1.74E-15 | LAMP5     | 1.492175 | 5.905256 | 1.39E-08 |
| GATSL3    | -1.52043 | -9.30102 | 1.83E-17 | MMP11     | 1.493405 | 7.526681 | 1.49E-12 |
| LINC00551 | -1.52124 | -15.0322 | 3.39E-35 | IRX4      | 1.495167 | 7.533262 | 1.43E-12 |
| AL833181  | -1.52169 | -6.78789 | 1.13E-10 | LURAP1L   | 1.498306 | 7.016878 | 3.04E-11 |
| AGPAT9    | -1.52598 | -7.70361 | 5.09E-13 | TNFRSF10E | 1.501105 | 12.18462 | 3.32E-26 |
| LINC01279 | -1.52631 | -4.92959 | 1.67E-06 | MSANTD3   | 1.502077 | 12.36504 | 9.04E-27 |
| PIK3C2B   | -1.5265  | -12.2126 | 2.71E-26 | NANOS1    | 1.502198 | 6.187488 | 3.13E-09 |
| CDKN2AIP  | -1.52705 | -13.6903 | 6.02E-31 | SERPINB4  | 1.503228 | 3.069308 | 0.002427 |
| PAMR1     | -1.53011 | -9.212   | 3.30E-17 | IFITM3    | 1.506737 | 13.16146 | 2.83E-29 |
| SRPX      | -1.5302  | -5.30963 | 2.78E-07 | HAS2      | 1.514095 | 6.098557 | 5.04E-09 |
| CCL21     | -1.53107 | -5.09044 | 7.90E-07 | MEST      | 1.515081 | 8.024512 | 7.01E-14 |
| C15orf52  | -1.53404 | -11.8679 | 3.23E-25 | GPC6      | 1.517443 | 5.308079 | 2.80E-07 |
| STK39     | -1.5341  | -11.1445 | 5.57E-23 | GLIS3     | 1.517624 | 7.358506 | 4.08E-12 |
| HBB       | -1.53475 | -6.44066 | 7.92E-10 | NREP      | 1.518665 | 11.20189 | 3.71E-23 |
| SORBS2    | -1.5348  | -14.3189 | 6.15E-33 | MDK       | 1.518962 | 7.097855 | 1.90E-11 |
| LOC100506 | -1.53632 | -10.7049 | 1.23E-21 | CHSY3     | 1.519061 | 8.097695 | 4.44E-14 |
| PMM1      | -1.53802 | -16.3384 | 2.55E-39 | ENAH      | 1.519956 | 12.58545 | 1.84E-27 |
| FNDC4     | -1.53817 | -14.7622 | 2.42E-34 | LOC100131 | 1.522165 | 9.338018 | 1.43E-17 |
| AZGP1     | -1.53899 | -2.74398 | 0.006593 | MX1       | 1.522244 | 6.519718 | 5.11E-10 |
| FGFBP2    | -1.54424 | -5.49327 | 1.13E-07 | CDKN2A    | 1.522745 | 6.032962 | 7.13E-09 |
| HLCS      | -1.54508 | -16.4794 | 9.21E-40 | CD69      | 1.523392 | 5.628932 | 5.74E-08 |
| LMOD2     | -1.54696 | -4.21675 | 3.68E-05 | GPX8      | 1.523456 | 8.362611 | 8.32E-15 |
| ARHGAP32  | -1.55003 | -10.3327 | 1.63E-20 | KIF14     | 1.523746 | 10.20683 | 3.90E-20 |
| PLCB4     | -1.55077 | -6.38139 | 1.10E-09 | SHISA2    | 1.523826 | 4.746513 | 3.82E-06 |
| DBNDD1    | -1.55227 | -13.9726 | 7.69E-32 | CD38      | 1.524907 | 5.350136 | 2.28E-07 |
| PRSS3P2   | -1.55291 | -8.81256 | 4.58E-16 | CTSL      | 1.527818 | 11.25329 | 2.58E-23 |
| TMEM79    | -1.55558 | -6.72734 | 1.60E-10 | IFITM1    | 1.528595 | 9.979543 | 1.86E-19 |
| CP        | -1.55572 | -5.61942 | 6.02E-08 | NRIP1     | 1.528652 | 13.51517 | 2.16E-30 |

|           |          |          |          |          |          |          |          |
|-----------|----------|----------|----------|----------|----------|----------|----------|
| NR2F1     | -1.55987 | -8.67371 | 1.13E-15 | CCL5     | 1.528798 | 5.835487 | 2.00E-08 |
| OCLN      | -1.56383 | -12.5242 | 2.86E-27 | ARPC1B   | 1.530129 | 12.53785 | 2.60E-27 |
| ARHGAP5-/ | -1.56592 | -11.0057 | 1.48E-22 | DNMT3B   | 1.531639 | 8.443735 | 4.96E-15 |
| CYP4F22   | -1.56801 | -6.26269 | 2.09E-09 | TIMP1    | 1.532648 | 8.529396 | 2.86E-15 |
| SEMA3G    | -1.56823 | -10.0643 | 1.04E-19 | MZB1     | 1.53288  | 4.338017 | 2.23E-05 |
| SSTR5-AS1 | -1.57084 | -5.48406 | 1.18E-07 | DUSP6    | 1.534685 | 10.06322 | 1.05E-19 |
| PGAP3     | -1.57476 | -15.2743 | 5.80E-36 | KDELC1   | 1.535302 | 10.40913 | 9.62E-21 |
| CD1C      | -1.57769 | -9.10562 | 6.68E-17 | PARP9    | 1.540395 | 10.24761 | 2.94E-20 |
| BTC       | -1.58651 | -15.5188 | 9.79E-37 | CHI3L1   | 1.542211 | 7.427975 | 2.70E-12 |
| PKIA      | -1.58892 | -6.3192  | 1.54E-09 | KLHDC7B  | 1.542269 | 5.902643 | 1.41E-08 |
| BTBD11    | -1.59135 | -7.1108  | 1.76E-11 | SRGN     | 1.542554 | 9.324686 | 1.56E-17 |
| FAM46B    | -1.59465 | -6.13088 | 4.24E-09 | VMP1     | 1.543013 | 8.798394 | 5.02E-16 |
| LOC646014 | -1.59772 | -13.4683 | 3.03E-30 | APOBEC3B | 1.54313  | 6.531462 | 4.79E-10 |
| ALDH3A2   | -1.59796 | -11.1285 | 6.24E-23 | NUAK1    | 1.543537 | 7.76357  | 3.52E-13 |
| SOSTDC1   | -1.5995  | -4.78311 | 3.24E-06 | ENPEP    | 1.545623 | 8.110293 | 4.10E-14 |
| SYNPO2L   | -1.60728 | -6.21669 | 2.68E-09 | LEPREL1  | 1.547929 | 9.392032 | 9.94E-18 |
| GNE       | -1.60805 | -10.0035 | 1.58E-19 | TEAD4    | 1.550007 | 10.7127  | 1.16E-21 |
| PPP1R1B   | -1.60938 | -6.93039 | 5.02E-11 | C1QC     | 1.551991 | 9.022877 | 1.15E-16 |
| PIGR      | -1.6096  | -3.93749 | 0.000112 | STEAP1   | 1.552304 | 10.03145 | 1.30E-19 |
| RP11-38P2 | -1.61095 | -6.1854  | 3.17E-09 | PLOD1    | 1.557111 | 13.32917 | 8.35E-30 |
| SLC13A4   | -1.6128  | -15.3651 | 3.00E-36 | SLC7A7   | 1.560487 | 9.469233 | 5.92E-18 |
| LRMP      | -1.61392 | -5.6707  | 4.65E-08 | CDC25B   | 1.563108 | 13.10291 | 4.32E-29 |
| AQP3      | -1.61422 | -6.18671 | 3.15E-09 | TTC7B    | 1.563713 | 8.263169 | 1.56E-14 |
| EP300-AS1 | -1.61466 | -9.40006 | 9.42E-18 | CALU     | 1.564301 | 11.72827 | 8.77E-25 |
| ABAT      | -1.61821 | -12.0742 | 7.34E-26 | EMILIN1  | 1.56457  | 8.057357 | 5.71E-14 |
| CASQ1     | -1.62098 | -6.48964 | 6.04E-10 | THEMIS2  | 1.566996 | 9.00358  | 1.31E-16 |
| APOBEC2   | -1.62132 | -6.43035 | 8.38E-10 | TNS4     | 1.570811 | 11.14074 | 5.72E-23 |
| SLC16A7   | -1.62338 | -10.7797 | 7.26E-22 | MICAL2   | 1.570895 | 12.53421 | 2.67E-27 |
| COX7A1    | -1.62536 | -6.698   | 1.89E-10 | PPAPDC1A | 1.571757 | 5.906383 | 1.39E-08 |
| DUOX2     | -1.62931 | -5.22669 | 4.14E-07 | PLOD2    | 1.572894 | 8.137312 | 3.46E-14 |
| SYTL1     | -1.63161 | -10.169  | 5.06E-20 | OAS2     | 1.574228 | 9.043096 | 1.01E-16 |
| MPP7      | -1.63226 | -12.0466 | 8.96E-26 | CTSC     | 1.578745 | 11.98559 | 1.39E-25 |
| SBSN      | -1.63466 | -4.01893 | 8.14E-05 | SLA      | 1.584726 | 7.465718 | 2.15E-12 |
| UBL3      | -1.64051 | -17.9151 | 3.07E-44 | COL8A1   | 1.585036 | 12.59112 | 1.77E-27 |
| SERPINB1  | -1.6424  | -10.2917 | 2.17E-20 | CST7     | 1.585317 | 7.63349  | 7.80E-13 |
| ELOVL4    | -1.64565 | -5.77124 | 2.78E-08 | ERRFI1   | 1.588418 | 10.55438 | 3.51E-21 |
| SLC24A3   | -1.64804 | -7.58466 | 1.05E-12 | ACOT9    | 1.591287 | 13.31961 | 8.95E-30 |
| FXYD1     | -1.64837 | -7.55842 | 1.23E-12 | LAPTM4B  | 1.597364 | 12.02027 | 1.08E-25 |
| GPR110    | -1.6485  | -11.5581 | 2.95E-24 | TRIP13   | 1.599197 | 8.820263 | 4.35E-16 |
| GRAMD1C   | -1.64893 | -7.70328 | 5.10E-13 | IL32     | 1.606149 | 7.997591 | 8.29E-14 |
| DUSP5     | -1.65127 | -9.06068 | 8.99E-17 | UHRF1    | 1.606831 | 9.841226 | 4.78E-19 |
| EDAR      | -1.65168 | -13.5782 | 1.36E-30 | AAED1    | 1.608297 | 13.54904 | 1.68E-30 |
| BSPRY     | -1.6562  | -7.67381 | 6.10E-13 | ALOX12B  | 1.610924 | 3.929657 | 0.000115 |
| IGFL1     | -1.6619  | -3.74557 | 0.000232 | IL2RB    | 1.612839 | 6.825726 | 9.14E-11 |
| DIO2      | -1.66757 | -8.07842 | 5.01E-14 | GPNMB    | 1.613507 | 10.68975 | 1.36E-21 |
| ATP12A    | -1.67018 | -6.93017 | 5.02E-11 | KRT14    | 1.615818 | 9.62231  | 2.11E-18 |
| CKMT2     | -1.67214 | -5.99481 | 8.72E-09 | PTGFRN   | 1.621019 | 12.26712 | 1.83E-26 |

|           |          |          |          |            |          |          |          |
|-----------|----------|----------|----------|------------|----------|----------|----------|
| P2RY14    | -1.67597 | -8.03814 | 6.44E-14 | PANX1      | 1.62221  | 11.83028 | 4.23E-25 |
| PAX1      | -1.68121 | -7.444   | 2.45E-12 | DLX5       | 1.623854 | 7.680487 | 5.86E-13 |
| LMO7      | -1.68252 | -11.4118 | 8.37E-24 | SLC39A6    | 1.624155 | 12.41866 | 6.14E-27 |
| TCAP      | -1.68529 | -5.87411 | 1.64E-08 | CDCA5      | 1.625609 | 10.60724 | 2.42E-21 |
| ID4       | -1.68732 | -13.3955 | 5.15E-30 | SLC6A14    | 1.626197 | 4.524324 | 1.01E-05 |
| MYL2      | -1.68753 | -2.83793 | 0.004984 | RCN3       | 1.628956 | 8.631007 | 1.49E-15 |
| RP11-747H | -1.69318 | -9.66223 | 1.61E-18 | LPAR3      | 1.630451 | 7.520569 | 1.55E-12 |
| CRIP2     | -1.69326 | -10.1425 | 6.08E-20 | RAC2       | 1.632056 | 7.538367 | 1.39E-12 |
| SYT8      | -1.69518 | -14.1971 | 1.49E-32 | AX746823   | 1.632809 | 8.859786 | 3.36E-16 |
| ABLIM1    | -1.69816 | -10.2968 | 2.10E-20 | GPR153     | 1.633122 | 10.12911 | 6.66E-20 |
| PRSS2     | -1.69934 | -11.8817 | 2.92E-25 | CTSV       | 1.633528 | 5.866206 | 1.71E-08 |
| MXD1      | -1.70061 | -9.47307 | 5.77E-18 | RP1-86D1.3 | 1.63708  | 10.91052 | 2.90E-22 |
| EHD3      | -1.70303 | -19.9087 | 2.50E-50 | CAV1       | 1.638623 | 7.588589 | 1.02E-12 |
| ZBED2     | -1.70378 | -5.92907 | 1.23E-08 | SUGCT      | 1.642399 | 7.925069 | 1.30E-13 |
| ETFDH     | -1.70471 | -16.5582 | 5.21E-40 | MB21D2     | 1.646697 | 13.51359 | 2.18E-30 |
| RAPGEFL1  | -1.70646 | -7.5226  | 1.53E-12 | MFHAS1     | 1.648521 | 12.90451 | 1.82E-28 |
| MGST2     | -1.7082  | -14.7913 | 1.96E-34 | LHFPL2     | 1.651051 | 12.568   | 2.09E-27 |
| SDPR      | -1.71215 | -11.7528 | 7.36E-25 | FOXMI      | 1.652572 | 9.597772 | 2.49E-18 |
| TGM5      | -1.71534 | -7.06078 | 2.36E-11 | PSMB9      | 1.654371 | 8.15106  | 3.17E-14 |
| SVIP      | -1.72207 | -9.00861 | 1.27E-16 | LRP12      | 1.655344 | 9.269941 | 2.25E-17 |
| MLLT4-AS1 | -1.72225 | -18.3472 | 1.42E-45 | FKBP5      | 1.657964 | 6.640206 | 2.61E-10 |
| KRT15     | -1.72317 | -5.33405 | 2.47E-07 | ANGPT2     | 1.658739 | 11.17715 | 4.42E-23 |
| TFF1      | -1.72656 | -4.61037 | 6.96E-06 | HOXB7      | 1.663082 | 8.908139 | 2.45E-16 |
| TF        | -1.7276  | -8.57349 | 2.16E-15 | CPXM1      | 1.666945 | 7.435142 | 2.58E-12 |
| KRT33A    | -1.72801 | -11.9749 | 1.50E-25 | DACT1      | 1.668341 | 5.877788 | 1.61E-08 |
| BCAS1     | -1.73082 | -12.9566 | 1.25E-28 | PROCR      | 1.673285 | 10.10317 | 7.96E-20 |
| TMPRSS2   | -1.73945 | -12.2139 | 2.69E-26 | C3AR1      | 1.673667 | 10.73684 | 9.80E-22 |
| TMEM178A  | -1.74135 | -5.41149 | 1.69E-07 | CCNA1      | 1.685733 | 4.957363 | 1.47E-06 |
| PRR15L    | -1.74626 | -8.57019 | 2.20E-15 | PI3        | 1.689662 | 5.852959 | 1.83E-08 |
| CRISP2    | -1.74628 | -8.14558 | 3.29E-14 | WNT2       | 1.691013 | 6.95451  | 4.37E-11 |
| TMEM40    | -1.74884 | -9.53346 | 3.84E-18 | FJX1       | 1.692928 | 8.863897 | 3.27E-16 |
| VAV3      | -1.7517  | -8.85129 | 3.56E-16 | ITGAV      | 1.693395 | 14.49568 | 1.69E-33 |
| FAM214A   | -1.75283 | -13.6934 | 5.89E-31 | CTGF       | 1.696139 | 7.388619 | 3.41E-12 |
| ALS2CL    | -1.75378 | -11.4222 | 7.77E-24 | RAI14      | 1.697916 | 10.02747 | 1.34E-19 |
| RAB25     | -1.77132 | -8.46194 | 4.41E-15 | F2RL2      | 1.704442 | 12.95292 | 1.28E-28 |
| SLC25A23  | -1.77462 | -15.6012 | 5.37E-37 | TMEM200A   | 1.71748  | 6.942757 | 4.67E-11 |
| MEIS2     | -1.77912 | -11.3328 | 1.47E-23 | WDR54      | 1.721064 | 11.56604 | 2.79E-24 |
| CRYAB     | -1.78042 | -7.11825 | 1.69E-11 | RGS20      | 1.723117 | 8.548079 | 2.54E-15 |
| CYP4X1    | -1.78665 | -5.32182 | 2.62E-07 | PARP12     | 1.72469  | 12.5418  | 2.52E-27 |
| ZNF750    | -1.79208 | -7.21777 | 9.40E-12 | TDO2       | 1.727578 | 9.775284 | 7.49E-19 |
| WIF1      | -1.79549 | -5.93713 | 1.18E-08 | UBE2L6     | 1.728942 | 11.64176 | 1.63E-24 |
| C9orf152  | -1.79615 | -10.4637 | 6.59E-21 | LOC344887  | 1.731484 | 4.975214 | 1.35E-06 |
| RP11-391N | -1.79741 | -11.0426 | 1.14E-22 | LY6E       | 1.736368 | 10.43752 | 7.90E-21 |
| MYH7      | -1.79771 | -6.61387 | 3.03E-10 | SLC2A3     | 1.736592 | 9.246827 | 2.62E-17 |
| PLEKHA7   | -1.7988  | -12.3022 | 1.42E-26 | IL12RB2    | 1.737769 | 7.454923 | 2.29E-12 |
| SLC6A4    | -1.81292 | -17.4491 | 8.57E-43 | RGS4       | 1.738494 | 7.271604 | 6.84E-12 |
| TMPRSS11A | -1.81534 | -5.04486 | 9.77E-07 | PGBD5      | 1.741338 | 7.642009 | 7.41E-13 |

|           |          |          |          |           |          |          |          |
|-----------|----------|----------|----------|-----------|----------|----------|----------|
| CLU       | -1.81712 | -8.6924  | 1.00E-15 | RAB31     | 1.743362 | 13.89663 | 1.34E-31 |
| ZDHHC11   | -1.81835 | -11.2242 | 3.17E-23 | BID       | 1.746601 | 13.31027 | 9.58E-30 |
| ZNF823    | -1.81862 | -16.3031 | 3.30E-39 | PLAT      | 1.748421 | 7.031064 | 2.80E-11 |
| TRIP10    | -1.82532 | -17.4581 | 8.03E-43 | PLOD3     | 1.753786 | 13.77859 | 3.16E-31 |
| RFK       | -1.82794 | -18.8989 | 2.89E-47 | MINPP1    | 1.761657 | 16.56637 | 4.91E-40 |
| EXPH5     | -1.83484 | -12.4461 | 5.04E-27 | FOS       | 1.762412 | 5.634891 | 5.57E-08 |
| CES2      | -1.84098 | -10.6153 | 2.29E-21 | RUNX1-IT1 | 1.766085 | 7.559299 | 1.22E-12 |
| PLEKHG6   | -1.84181 | -12.6227 | 1.41E-27 | RP11-1L12 | 1.766339 | 9.095774 | 7.13E-17 |
| DPT       | -1.84546 | -6.99613 | 3.43E-11 | POPDC3    | 1.766609 | 4.867472 | 2.21E-06 |
| SERPINB13 | -1.84793 | -7.02125 | 2.97E-11 | LGALS1    | 1.767355 | 11.52544 | 3.73E-24 |
| AMPD1     | -1.85791 | -7.23131 | 8.68E-12 | TSHZ3     | 1.769376 | 9.411305 | 8.73E-18 |
| EPB41L3   | -1.85934 | -11.305  | 1.79E-23 | KIF4A     | 1.771975 | 10.90343 | 3.05E-22 |
| LDOC1     | -1.8681  | -8.76305 | 6.32E-16 | APOC1     | 1.773527 | 8.034707 | 6.58E-14 |
| CLDN17    | -1.86838 | -5.70616 | 3.88E-08 | HENMT1    | 1.779641 | 10.45434 | 7.03E-21 |
| SLC16A14  | -1.86954 | -7.9071  | 1.46E-13 | FNDC1     | 1.781462 | 6.517086 | 5.19E-10 |
| LOC100507 | -1.87393 | -14.3798 | 3.94E-33 | MAGEA4    | 1.788093 | 4.310391 | 2.50E-05 |
| PLN       | -1.87616 | -7.72457 | 4.48E-13 | PFN2      | 1.789276 | 7.063884 | 2.32E-11 |
| SERPINB2  | -1.87848 | -6.50212 | 5.64E-10 | BGN       | 1.791809 | 9.227189 | 2.98E-17 |
| NYNRIN    | -1.88013 | -11.5778 | 2.57E-24 | CEBPB     | 1.793682 | 17.4072  | 1.16E-42 |
| BEX4      | -1.88051 | -9.63082 | 1.99E-18 | IGFBP3    | 1.795015 | 9.095608 | 7.14E-17 |
| ATP13A4   | -1.8832  | -13.8379 | 2.05E-31 | GJA1      | 1.79785  | 11.75516 | 7.23E-25 |
| CFH       | -1.88664 | -8.87303 | 3.09E-16 | DRAM1     | 1.803828 | 13.33298 | 8.12E-30 |
| SLN       | -1.8874  | -3.26996 | 0.001256 | SAMSN1    | 1.814026 | 9.868297 | 3.97E-19 |
| CWH43     | -1.88818 | -5.91706 | 1.31E-08 | CLIC4     | 1.814435 | 13.83606 | 2.08E-31 |
| SH3PXD2A  | -1.89337 | -9.20205 | 3.53E-17 | SLAMF8    | 1.816264 | 10.33533 | 1.60E-20 |
| SLC44A3   | -1.89431 | -11.6002 | 2.19E-24 | CHN1      | 1.819428 | 12.01578 | 1.12E-25 |
| GGTA1P    | -1.89797 | -10.3453 | 1.50E-20 | CTSK      | 1.819999 | 10.05761 | 1.09E-19 |
| LRRN4CL   | -1.90426 | -10.5972 | 2.60E-21 | WARS      | 1.820528 | 8.094927 | 4.52E-14 |
| NDRG2     | -1.90935 | -13.8446 | 1.96E-31 | SLC28A3   | 1.820786 | 8.352914 | 8.85E-15 |
| PGAM2     | -1.90944 | -8.39107 | 6.94E-15 | XAF1      | 1.821302 | 9.432461 | 7.58E-18 |
| SLC35C1   | -1.91204 | -16.5772 | 4.54E-40 | FCER1G    | 1.822302 | 10.99263 | 1.63E-22 |
| ATP6V1C2  | -1.91599 | -7.45235 | 2.33E-12 | CXCL5     | 1.822955 | 7.838411 | 2.22E-13 |
| ECHDC2    | -1.92194 | -11.5267 | 3.69E-24 | CST1      | 1.82664  | 4.862736 | 2.26E-06 |
| MYL3      | -1.92485 | -6.50573 | 5.53E-10 | FOXD1     | 1.827696 | 9.410641 | 8.77E-18 |
| CEACAM5   | -1.92541 | -8.92294 | 2.22E-16 | SPARC     | 1.831293 | 10.56688 | 3.21E-21 |
| MYO5C     | -1.92636 | -6.63112 | 2.75E-10 | EPPK1     | 1.834722 | 10.58656 | 2.80E-21 |
| CTTNBP2   | -1.92737 | -11.9598 | 1.67E-25 | DKK1      | 1.837016 | 4.901346 | 1.90E-06 |
| C15orf48  | -1.93239 | -8.39266 | 6.87E-15 | MTCL1     | 1.83992  | 11.1136  | 6.93E-23 |
| MYLPF     | -1.93649 | -4.07778 | 6.44E-05 | SLCO1B3   | 1.842229 | 5.550937 | 8.48E-08 |
| GREM2     | -1.93679 | -15.5795 | 6.29E-37 | S100A7A   | 1.848045 | 8.466772 | 4.28E-15 |
| RNASE4    | -1.94261 | -8.41431 | 5.99E-15 | ZIC2      | 1.860361 | 8.285717 | 1.36E-14 |
| HSPB8     | -1.94301 | -9.62986 | 2.01E-18 | CEP55     | 1.863418 | 12.29431 | 1.51E-26 |
| LNX1      | -1.94749 | -15.6835 | 2.95E-37 | LCE3D     | 1.885539 | 3.811836 | 0.000181 |
| SORT1     | -1.94841 | -16.0922 | 1.52E-38 | NEFL      | 1.886379 | 5.808401 | 2.30E-08 |
| EHF       | -1.94875 | -9.94392 | 2.37E-19 | C1QB      | 1.887675 | 9.655575 | 1.69E-18 |
| TSPAN6    | -1.95411 | -12.9327 | 1.49E-28 | ITGA5     | 1.889154 | 9.976    | 1.90E-19 |
| DHRS11    | -1.95454 | -12.1872 | 3.26E-26 | IRS1      | 1.890458 | 11.11312 | 6.95E-23 |

|           |          |          |          |          |          |          |          |
|-----------|----------|----------|----------|----------|----------|----------|----------|
| REEP6     | -1.95661 | -15.4665 | 1.43E-36 | SLC2A1   | 1.892662 | 9.19228  | 3.76E-17 |
| CLGN      | -1.97187 | -8.24123 | 1.80E-14 | SLC38A5  | 1.893326 | 6.862957 | 7.39E-11 |
| SHROOM3   | -1.97258 | -15.8734 | 7.43E-38 | ICAM1    | 1.89349  | 10.45376 | 7.06E-21 |
| S100A14   | -1.98001 | -10.8296 | 5.12E-22 | THBS1    | 1.894985 | 10.18807 | 4.44E-20 |
| STX19     | -1.9802  | -11.3785 | 1.06E-23 | OSMR     | 1.898118 | 12.61463 | 1.49E-27 |
| CXCR2     | -1.98103 | -10.1308 | 6.58E-20 | FCGR3B   | 1.898736 | 9.400975 | 9.36E-18 |
| HRASLS    | -1.98196 | -8.68998 | 1.02E-15 | CYP27B1  | 1.902082 | 7.845295 | 2.13E-13 |
| ELF3      | -1.98392 | -8.39902 | 6.60E-15 | IGFL2    | 1.90302  | 5.689072 | 4.23E-08 |
| NR3C2     | -1.98866 | -11.593  | 2.30E-24 | CYP24A1  | 1.913291 | 7.059698 | 2.37E-11 |
| FHL1      | -1.99662 | -6.60437 | 3.19E-10 | FAT1     | 1.916335 | 12.5411  | 2.54E-27 |
| KAT2B     | -2.00351 | -13.3689 | 6.25E-30 | TYMP     | 1.916686 | 13.97691 | 7.45E-32 |
| MUC4      | -2.00363 | -7.34946 | 4.31E-12 | CCL18    | 1.917479 | 6.950382 | 4.47E-11 |
| PP14571   | -2.00709 | -14.7892 | 1.99E-34 | RGS1     | 1.920696 | 11.71858 | 9.40E-25 |
| HOPX      | -2.00747 | -10.5439 | 3.77E-21 | LPCAT1   | 1.925158 | 12.55084 | 2.36E-27 |
| GRHL1     | -2.01026 | -8.51794 | 3.08E-15 | CDC6     | 1.932033 | 10.82129 | 5.42E-22 |
| ACKR1     | -2.01146 | -7.07671 | 2.15E-11 | ODC1     | 1.935157 | 8.691615 | 1.01E-15 |
| LTF       | -2.01315 | -3.10298 | 0.002178 | AR SJ    | 1.953045 | 9.46436  | 6.12E-18 |
| SCARA5    | -2.01321 | -11.1772 | 4.42E-23 | TAP1     | 1.954758 | 11.82246 | 4.47E-25 |
| FETUB     | -2.01482 | -7.85716 | 1.98E-13 | LAMB3    | 1.956465 | 8.925605 | 2.19E-16 |
| LCN2      | -2.01887 | -5.84213 | 1.93E-08 | GNLY     | 1.95775  | 7.807955 | 2.68E-13 |
| CRIP1     | -2.01934 | -11.6902 | 1.15E-24 | FBLIM1   | 1.963996 | 12.20457 | 2.87E-26 |
| CA3       | -2.02295 | -6.23884 | 2.38E-09 | CYP27C1  | 1.964548 | 8.526109 | 2.92E-15 |
| CAPN5     | -2.02345 | -17.6362 | 2.25E-43 | MMP7     | 1.965862 | 5.204953 | 4.59E-07 |
| PKIB      | -2.04073 | -15.624  | 4.55E-37 | C4orf48  | 1.969514 | 14.0691  | 3.80E-32 |
| TPPP3     | -2.04261 | -6.42399 | 8.68E-10 | SMIM3    | 1.977746 | 12.55042 | 2.37E-27 |
| ABLIM3    | -2.05611 | -12.7951 | 4.04E-28 | FN1      | 1.981801 | 7.978964 | 9.31E-14 |
| IL18      | -2.06306 | -9.42579 | 7.92E-18 | LTBP1    | 1.986652 | 9.939907 | 2.44E-19 |
| MALL      | -2.06764 | -10.9946 | 1.60E-22 | COL17A1  | 1.990702 | 7.088237 | 2.01E-11 |
| OGN       | -2.07644 | -7.11055 | 1.76E-11 | NFIL3    | 1.990886 | 14.88966 | 9.57E-35 |
| ELOVL6    | -2.09746 | -16.3738 | 1.98E-39 | PNLIPRP3 | 1.993646 | 5.071286 | 8.64E-07 |
| WFDC21P   | -2.10352 | -7.07726 | 2.14E-11 | TTYH3    | 1.998611 | 13.98908 | 6.82E-32 |
| LOC101928 | -2.1096  | -12.2093 | 2.78E-26 | USP18    | 2.000981 | 8.505197 | 3.35E-15 |
| TFF3      | -2.11337 | -5.36603 | 2.11E-07 | FST      | 2.017401 | 7.428857 | 2.68E-12 |
| CD207     | -2.11494 | -8.70922 | 8.97E-16 | SFRP4    | 2.034113 | 5.466643 | 1.29E-07 |
| MEIS1     | -2.12127 | -10.738  | 9.73E-22 | CCL8     | 2.035537 | 7.585995 | 1.04E-12 |
| ESPL1     | -2.1254  | -15.3317 | 3.82E-36 | MARCKSL1 | 2.035882 | 11.02923 | 1.26E-22 |
| PAQR8     | -2.12649 | -17.3136 | 2.26E-42 | COL16A1  | 2.037839 | 14.88773 | 9.70E-35 |
| SCGB2A1   | -2.14469 | -6.83777 | 8.53E-11 | GBP1     | 2.038221 | 10.45045 | 7.22E-21 |
| IL1RN     | -2.14589 | -11.9401 | 1.92E-25 | GALNT6   | 2.039203 | 6.623975 | 2.86E-10 |
| SLC26A2   | -2.15628 | -12.4431 | 5.15E-27 | TREM2    | 2.045402 | 9.712111 | 1.15E-18 |
| TMEM45B   | -2.16079 | -7.22595 | 8.96E-12 | DSG2     | 2.045763 | 8.73937  | 7.37E-16 |
| PTN       | -2.16499 | -10.0132 | 1.48E-19 | KHDC1L   | 2.049349 | 6.147777 | 3.88E-09 |
| FMO2      | -2.16654 | -5.81922 | 2.18E-08 | AP000525 | 2.0585   | 7.966821 | 1.00E-13 |
| ANGPTL1   | -2.17201 | -10.1862 | 4.50E-20 | LAMB1    | 2.059393 | 14.02352 | 5.30E-32 |
| SLC27A6   | -2.17213 | -13.0994 | 4.44E-29 | TPST1    | 2.076267 | 10.86026 | 4.13E-22 |
| KLK13     | -2.1795  | -8.33173 | 1.01E-14 | LRRC15   | 2.078743 | 13.29733 | 1.05E-29 |
| DMBT1     | -2.17969 | -4.56628 | 8.43E-06 | MUCL1    | 2.082056 | 5.309914 | 2.77E-07 |

|           |          |          |          |           |          |          |          |
|-----------|----------|----------|----------|-----------|----------|----------|----------|
| MFAP4     | -2.18093 | -8.08506 | 4.80E-14 | HTRA1     | 2.087798 | 10.12153 | 7.02E-20 |
| UPK1A     | -2.18311 | -9.55074 | 3.42E-18 | SNAI2     | 2.096224 | 13.36549 | 6.41E-30 |
| GPX3      | -2.18566 | -9.5969  | 2.51E-18 | COMP      | 2.098227 | 5.894379 | 1.47E-08 |
| SPRR3     | -2.19317 | -5.10125 | 7.51E-07 | TREM1     | 2.10123  | 7.55319  | 1.27E-12 |
| C6orf132  | -2.20472 | -11.5292 | 3.63E-24 | ADORA2B   | 2.102031 | 9.92782  | 2.65E-19 |
| MUC1      | -2.20538 | -10.1365 | 6.33E-20 | LL22NC03- | 2.105876 | 9.298206 | 1.86E-17 |
| APOD      | -2.20666 | -6.21871 | 2.65E-09 | WFDC12    | 2.116276 | 5.033209 | 1.03E-06 |
| CYP4F12   | -2.20766 | -10.1259 | 6.81E-20 | MIR31HG   | 2.118132 | 7.682998 | 5.77E-13 |
| CALB2     | -2.21167 | -11.106  | 7.31E-23 | NCF2      | 2.127582 | 12.30008 | 1.44E-26 |
| C2orf40   | -2.21231 | -11.6351 | 1.71E-24 | FLRT3     | 2.136362 | 5.284297 | 3.14E-07 |
| SCGB2A2   | -2.21622 | -7.02885 | 2.84E-11 | LAMP3     | 2.137576 | 9.238475 | 2.77E-17 |
| GRHL3     | -2.21731 | -8.06322 | 5.51E-14 | DDX60     | 2.138386 | 10.97933 | 1.79E-22 |
| RRAGD     | -2.21865 | -10.7222 | 1.09E-21 | HOMER3    | 2.140982 | 13.06413 | 5.73E-29 |
| MYOT      | -2.21884 | -4.682   | 5.08E-06 | AEBP1     | 2.145064 | 10.4268  | 8.51E-21 |
| MYOC      | -2.22651 | -14.0085 | 5.92E-32 | IFIT1     | 2.153464 | 6.902627 | 5.88E-11 |
| MACC1     | -2.2269  | -11.8834 | 2.89E-25 | ADAM12    | 2.156405 | 12.29851 | 1.46E-26 |
| SULT2B1   | -2.22739 | -8.56962 | 2.21E-15 | FPR3      | 2.157999 | 11.45852 | 6.00E-24 |
| SNORA68   | -2.23017 | -16.7264 | 1.55E-40 | ITGA6     | 2.158463 | 13.03579 | 7.04E-29 |
| MANSC1    | -2.23816 | -10.8827 | 3.52E-22 | COL12A1   | 2.164371 | 11.41314 | 8.29E-24 |
| PLS1      | -2.24114 | -7.95166 | 1.10E-13 | OLFML2B   | 2.169431 | 10.42208 | 8.80E-21 |
| CYP4F3    | -2.24307 | -7.7696  | 3.40E-13 | ANO1      | 2.178165 | 7.718601 | 4.64E-13 |
| FAM221A   | -2.24823 | -14.1875 | 1.60E-32 | TMEM158   | 2.194143 | 10.22428 | 3.46E-20 |
| PTK6      | -2.24956 | -12.8067 | 3.71E-28 | GZMB      | 2.218801 | 7.949524 | 1.12E-13 |
| CSTB      | -2.26066 | -12.7435 | 5.86E-28 | ITGA3     | 2.229614 | 12.24181 | 2.20E-26 |
| KRT23     | -2.27131 | -6.25429 | 2.19E-09 | PPP1R14C  | 2.241132 | 10.53194 | 4.10E-21 |
| FAM189A2  | -2.27579 | -14.094  | 3.17E-32 | PTPRZ1    | 2.250242 | 10.54199 | 3.82E-21 |
| ADH1B     | -2.27878 | -15.3636 | 3.03E-36 | ABCA12    | 2.259652 | 7.267654 | 7.00E-12 |
| MAB21L3   | -2.27903 | -10.4656 | 6.50E-21 | TLR2      | 2.261589 | 12.70618 | 7.68E-28 |
| KRT24     | -2.298   | -4.56554 | 8.46E-06 | LOX       | 2.264884 | 11.79897 | 5.29E-25 |
| TNNC1     | -2.30113 | -4.11483 | 5.56E-05 | RTP4      | 2.278331 | 8.833067 | 4.01E-16 |
| SELENBP1  | -2.31678 | -10.1891 | 4.41E-20 | SNX10     | 2.296345 | 11.88658 | 2.82E-25 |
| SMAGP     | -2.31798 | -13.3782 | 5.84E-30 | SPINK6    | 2.297831 | 5.199329 | 4.72E-07 |
| LINC01315 | -2.31898 | -12.3923 | 7.43E-27 | CDH11     | 2.298662 | 10.7317  | 1.02E-21 |
| COBL      | -2.33145 | -14.7245 | 3.19E-34 | NELL2     | 2.299707 | 6.603846 | 3.20E-10 |
| PLP1      | -2.33265 | -12.0356 | 9.69E-26 | COL7A1    | 2.308426 | 14.52596 | 1.36E-33 |
| SAMD5     | -2.3364  | -15.5982 | 5.49E-37 | ADAMTS2   | 2.309819 | 14.66049 | 5.09E-34 |
| UPK1B     | -2.33845 | -5.40899 | 1.71E-07 | WISP1     | 2.325073 | 12.92034 | 1.63E-28 |
| ATP1A2    | -2.34365 | -7.53697 | 1.40E-12 | FSCN1     | 2.327813 | 14.77696 | 2.18E-34 |
| CEACAM6   | -2.34529 | -7.15996 | 1.32E-11 | SERPINA3  | 2.335799 | 5.398204 | 1.80E-07 |
| C1orf116  | -2.34774 | -11.0897 | 8.20E-23 | SCG5      | 2.338985 | 7.864828 | 1.89E-13 |
| ZNF185    | -2.35033 | -11.7174 | 9.48E-25 | NETO2     | 2.352293 | 12.07907 | 7.09E-26 |
| CLDN8     | -2.3566  | -10.2874 | 2.24E-20 | TNFAIP3   | 2.355405 | 14.79002 | 1.98E-34 |
| KRT31     | -2.35845 | -9.13106 | 5.65E-17 | TNC       | 2.357823 | 11.93339 | 2.02E-25 |
| BLNK      | -2.37051 | -10.4139 | 9.31E-21 | DCBLD1    | 2.359497 | 12.01874 | 1.09E-25 |
| LPIN1     | -2.37366 | -16.6042 | 3.74E-40 | STAT1     | 2.376663 | 12.745   | 5.80E-28 |
| BNIP1     | -2.37389 | -11.4538 | 6.21E-24 | THBS2     | 2.402192 | 10.06369 | 1.04E-19 |
| CLDN7     | -2.38975 | -9.43944 | 7.23E-18 | BMP2      | 2.405514 | 9.996103 | 1.66E-19 |

|          |          |          |          |           |          |          |          |
|----------|----------|----------|----------|-----------|----------|----------|----------|
| PPP1R3C  | -2.39846 | -14.6871 | 4.19E-34 | GBP5      | 2.410837 | 8.533458 | 2.79E-15 |
| TJP3     | -2.39852 | -15.6378 | 4.12E-37 | FCGR1B    | 2.436147 | 10.03645 | 1.26E-19 |
| CYP2J2   | -2.39909 | -11.4209 | 7.84E-24 | IFI35     | 2.436187 | 12.50984 | 3.18E-27 |
| KLHL41   | -2.40232 | -4.76144 | 3.57E-06 | PLEK2     | 2.436236 | 10.43979 | 7.78E-21 |
| SASH1    | -2.40459 | -15.0412 | 3.17E-35 | PDPN      | 2.444978 | 14.18128 | 1.68E-32 |
| PAIP2B   | -2.40945 | -13.3858 | 5.53E-30 | CXCR4     | 2.449955 | 8.391162 | 6.94E-15 |
| EVPL     | -2.41027 | -12.1323 | 4.83E-26 | MYO1B     | 2.450346 | 14.65411 | 5.33E-34 |
| MUC5B    | -2.41666 | -5.87714 | 1.61E-08 | CHST11    | 2.478803 | 13.52141 | 2.06E-30 |
| C15orf62 | -2.41666 | -19.2821 | 1.96E-48 | HERC5     | 2.484981 | 10.91666 | 2.78E-22 |
| C1orf177 | -2.41836 | -15.5426 | 8.23E-37 | CMPK2     | 2.488969 | 9.431566 | 7.62E-18 |
| NUCB2    | -2.42417 | -20.6761 | 1.26E-52 | ASPRV1    | 2.498077 | 5.509127 | 1.04E-07 |
| RBP7     | -2.42769 | -11.4581 | 6.02E-24 | EGFL6     | 2.504554 | 10.72082 | 1.10E-21 |
| IGSF10   | -2.43055 | -13.6713 | 6.91E-31 | FOSL1     | 2.512226 | 9.197623 | 3.63E-17 |
| ACPP     | -2.43381 | -16.6792 | 2.17E-40 | IFIT3     | 2.513587 | 9.65226  | 1.72E-18 |
| TP53INP2 | -2.43967 | -14.309  | 6.61E-33 | DSC1      | 2.51549  | 4.956672 | 1.47E-06 |
| EYA2     | -2.46072 | -9.35315 | 1.29E-17 | CDSN      | 2.51937  | 6.026134 | 7.40E-09 |
| CYP2E1   | -2.46556 | -8.76238 | 6.35E-16 | SEMA3C    | 2.522306 | 10.32288 | 1.75E-20 |
| SUSD4    | -2.47056 | -9.79382 | 6.60E-19 | CYR61     | 2.527728 | 9.968012 | 2.01E-19 |
| TGFBR3   | -2.47157 | -11.155  | 5.17E-23 | CCL11     | 2.528816 | 8.653966 | 1.28E-15 |
| BPIFB2   | -2.47492 | -5.26341 | 3.47E-07 | CXCL3     | 2.534832 | 8.62958  | 1.50E-15 |
| NMU      | -2.47965 | -8.39795 | 6.64E-15 | IFI44     | 2.53826  | 10.96216 | 2.02E-22 |
| TMEM100  | -2.48306 | -13.9716 | 7.74E-32 | APOL1     | 2.549728 | 11.9115  | 2.36E-25 |
| MMRN1    | -2.49343 | -11.2756 | 2.20E-23 | TGFBI     | 2.565914 | 11.75051 | 7.48E-25 |
| MUC20    | -2.49547 | -13.161  | 2.83E-29 | CA2       | 2.567784 | 7.680845 | 5.85E-13 |
| MYOZ1    | -2.50625 | -7.30867 | 5.49E-12 | IL7R      | 2.573475 | 9.744411 | 9.23E-19 |
| EPS8L1   | -2.5137  | -12.9068 | 1.80E-28 | DFNA5     | 2.587399 | 10.84861 | 4.48E-22 |
| CCDC64B  | -2.51967 | -12.3749 | 8.42E-27 | C5AR1     | 2.593295 | 13.1942  | 2.23E-29 |
| SLC16A6  | -2.52309 | -13.1717 | 2.62E-29 | LUM       | 2.600988 | 16.07302 | 1.75E-38 |
| MYBPC1   | -2.52645 | -5.05833 | 9.18E-07 | WDR66     | 2.601907 | 14.15938 | 1.97E-32 |
| NDNF     | -2.53696 | -15.3695 | 2.90E-36 | BNC1      | 2.65109  | 12.7404  | 6.00E-28 |
| PLLP     | -2.53785 | -12.2529 | 2.03E-26 | KRT1      | 2.669005 | 3.944948 | 0.000109 |
| BARX2    | -2.54555 | -17.5519 | 4.10E-43 | PTGS2     | 2.70203  | 8.15929  | 3.01E-14 |
| MGLL     | -2.55354 | -14.5929 | 8.33E-34 | KRT75     | 2.71888  | 6.884964 | 6.51E-11 |
| CILP     | -2.56463 | -8.19245 | 2.45E-14 | C12orf75  | 2.718955 | 14.00335 | 6.14E-32 |
| PIP      | -2.5704  | -4.93777 | 1.60E-06 | IFI27     | 2.720669 | 12.32353 | 1.22E-26 |
| KLK11    | -2.57481 | -8.30232 | 1.22E-14 | AIM2      | 2.758313 | 9.201793 | 3.53E-17 |
| MYL1     | -2.57586 | -3.93563 | 0.000113 | CTA-384D8 | 2.767899 | 11.63115 | 1.75E-24 |
| SFTA2    | -2.59542 | -14.5484 | 1.15E-33 | EPSTI1    | 2.771028 | 11.82784 | 4.30E-25 |
| DHRS9    | -2.59619 | -8.78416 | 5.51E-16 | PLAUR     | 2.779973 | 16.37318 | 1.99E-39 |
| KLK12    | -2.6027  | -7.21461 | 9.58E-12 | NID2      | 2.788327 | 12.96604 | 1.17E-28 |
| HPGD     | -2.61924 | -9.90274 | 3.14E-19 | IFI44L    | 2.796363 | 8.161389 | 2.97E-14 |
| TGM1     | -2.63127 | -7.6188  | 8.53E-13 | CCL4      | 2.809322 | 11.71671 | 9.52E-25 |
| CAB39L   | -2.64082 | -21.6169 | 2.12E-55 | IL6       | 2.815996 | 8.287649 | 1.34E-14 |
| MB       | -2.64592 | -5.05277 | 9.42E-07 | IL1B      | 2.849882 | 8.653315 | 1.29E-15 |
| CEACAM7  | -2.64632 | -7.30376 | 5.65E-12 | TMEM45A   | 2.866847 | 10.98547 | 1.71E-22 |
| EPHX3    | -2.64689 | -7.8962  | 1.56E-13 | SLC16A1   | 2.874677 | 14.13115 | 2.42E-32 |
| SCNN1B   | -2.65044 | -11.3562 | 1.24E-23 | COL3A1    | 2.875045 | 13.82641 | 2.23E-31 |



|           |          |          |          |           |          |          |          |
|-----------|----------|----------|----------|-----------|----------|----------|----------|
| CFD       | -2.66319 | -11.3855 | 1.01E-23 | IDO1      | 2.910369 | 7.989298 | 8.73E-14 |
| TNNI2     | -2.6644  | -6.56857 | 3.90E-10 | PMEPA1    | 2.912619 | 14.60839 | 7.44E-34 |
| EMP1      | -2.67872 | -17.4934 | 6.24E-43 | SPP1      | 2.932579 | 11.02323 | 1.31E-22 |
| CAPNS2    | -2.70283 | -8.82159 | 4.32E-16 | BCL2A1    | 2.934567 | 10.3214  | 1.77E-20 |
| SCGB3A1   | -2.71598 | -5.58983 | 6.98E-08 | MAGEA6    | 2.95178  | 5.327191 | 2.55E-07 |
| OR7E14P   | -2.72771 | -17.1939 | 5.34E-42 | VCAN      | 2.981889 | 11.3217  | 1.59E-23 |
| CXCL17    | -2.73684 | -7.85936 | 1.95E-13 | COL1A2    | 2.99199  | 13.75072 | 3.88E-31 |
| CYP3A5    | -2.75024 | -14.4284 | 2.77E-33 | ADAMDEC:  | 3.00084  | 8.510348 | 3.24E-15 |
| GPT2      | -2.76005 | -12.3881 | 7.66E-27 | POSTN     | 3.001292 | 13.09541 | 4.57E-29 |
| AGR3      | -2.76838 | -7.08592 | 2.04E-11 | THY1      | 3.041052 | 15.6939  | 2.74E-37 |
| TNNC2     | -2.77992 | -5.91055 | 1.36E-08 | SULF1     | 3.059891 | 11.3659  | 1.16E-23 |
| DAPL1     | -2.79248 | -6.64967 | 2.48E-10 | COL1A1    | 3.129156 | 18.82721 | 4.79E-47 |
| GCHFR     | -2.82093 | -14.0103 | 5.84E-32 | PRR9      | 3.130595 | 6.385975 | 1.07E-09 |
| AGR2      | -2.82678 | -6.85824 | 7.59E-11 | CXCL6     | 3.132362 | 8.945397 | 1.92E-16 |
| ANKRD35   | -2.83366 | -13.4886 | 2.62E-30 | PXDN      | 3.16655  | 13.96197 | 8.31E-32 |
| EPHX2     | -2.88598 | -14.2752 | 8.46E-33 | COL10A1   | 3.175412 | 8.874092 | 3.06E-16 |
| LYVE1     | -2.89675 | -13.9794 | 7.32E-32 | ASPN      | 3.181614 | 10.31004 | 1.91E-20 |
| LOC102724 | -2.91926 | -10.9722 | 1.88E-22 | BST2      | 3.201741 | 12.64902 | 1.16E-27 |
| AIF1L     | -2.92822 | -18.0277 | 1.38E-44 | CCL20     | 3.210124 | 7.438841 | 2.53E-12 |
| CNFN      | -2.93576 | -7.52602 | 1.50E-12 | OASL      | 3.283294 | 11.20134 | 3.72E-23 |
| TSPAN8    | -2.95884 | -7.34672 | 4.38E-12 | TENM2     | 3.303345 | 10.14456 | 5.99E-20 |
| SCIN      | -2.9591  | -18.5099 | 4.49E-46 | RSAD2     | 3.312447 | 9.901946 | 3.16E-19 |
| CEACAM1   | -2.95959 | -12.5235 | 2.88E-27 | COL6A3    | 3.314983 | 17.93378 | 2.68E-44 |
| FUT6      | -2.96922 | -17.4724 | 7.25E-43 | COL11A1   | 3.356114 | 8.765146 | 6.24E-16 |
| TM7SF2    | -2.98116 | -11.073  | 9.22E-23 | IL24      | 3.375638 | 9.472989 | 5.77E-18 |
| TTC9      | -2.98536 | -14.5836 | 8.91E-34 | IL36G     | 3.444116 | 9.09012  | 7.40E-17 |
| PITX1     | -2.99695 | -11.9847 | 1.40E-25 | COL4A2    | 3.510492 | 20.11908 | 5.83E-51 |
| PLAC8     | -2.99822 | -6.94815 | 4.53E-11 | CXCL11    | 3.515367 | 8.206465 | 2.24E-14 |
| VIT       | -3.00126 | -19.3997 | 8.63E-49 | TNFRSF12A | 3.568476 | 14.79329 | 1.93E-34 |
| PPL       | -3.00404 | -12.4674 | 4.32E-27 | PLA2G7    | 3.60176  | 15.89236 | 6.48E-38 |
| GABRP     | -3.02582 | -6.61008 | 3.09E-10 | SERPINH1  | 3.647878 | 19.16471 | 4.47E-48 |
| ALDH1A1   | -3.03384 | -8.58028 | 2.06E-15 | CDH3      | 3.685165 | 18.2152  | 3.63E-45 |
| PRSS3     | -3.04219 | -9.83122 | 5.12E-19 | HOXC6     | 3.716364 | 14.2302  | 1.17E-32 |
| TYRP1     | -3.04988 | -10.2888 | 2.21E-20 | S100A7    | 3.718484 | 10.16688 | 5.14E-20 |
| FUT3      | -3.06164 | -15.0553 | 2.86E-35 | COL5A2    | 3.72419  | 15.80782 | 1.20E-37 |
| RAET1E    | -3.06581 | -11.6788 | 1.25E-24 | COL4A1    | 3.800549 | 22.06665 | 1.04E-56 |
| SCGB1A1   | -3.06734 | -10.4665 | 6.46E-21 | COL5A1    | 3.819101 | 14.84346 | 1.34E-34 |
| ALOX12    | -3.0811  | -9.74556 | 9.16E-19 | TNFAIP6   | 3.837969 | 14.33273 | 5.56E-33 |
| MUC15     | -3.0919  | -9.95598 | 2.18E-19 | MMP9      | 3.914773 | 12.86954 | 2.35E-28 |
| CYP2C18   | -3.09869 | -9.8156  | 5.69E-19 | ISG15     | 3.943725 | 14.4287  | 2.76E-33 |
| GGT6      | -3.10295 | -15.0084 | 4.03E-35 | CXCL9     | 4.022741 | 9.890737 | 3.41E-19 |
| ECM1      | -3.11884 | -13.9362 | 1.00E-31 | MFAP2     | 4.023363 | 16.65403 | 2.61E-40 |
| LOC284825 | -3.12022 | -24.3516 | 3.35E-63 | INHBA     | 4.065762 | 14.3718  | 4.18E-33 |
| CLIC3     | -3.13352 | -10.1305 | 6.60E-20 | KRT16     | 4.094001 | 13.7665  | 3.45E-31 |
| PEG3      | -3.1354  | -12.9953 | 9.44E-29 | MMP13     | 4.11304  | 8.200689 | 2.32E-14 |
| C2orf54   | -3.1487  | -20.628  | 1.76E-52 | LAMC2     | 4.178281 | 15.06421 | 2.68E-35 |
| TPRG1     | -3.18727 | -9.99242 | 1.70E-19 | CXCL1     | 4.178731 | 14.25267 | 9.97E-33 |

|            |          |          |          |          |          |          |          |
|------------|----------|----------|----------|----------|----------|----------|----------|
| SCEL       | -3.18959 | -12.0584 | 8.23E-26 | CXCL13   | 4.288425 | 9.676518 | 1.46E-18 |
| SPNS2      | -3.19638 | -14.1028 | 2.97E-32 | SPRR2G   | 4.461817 | 8.230987 | 1.92E-14 |
| PLA2G2A    | -3.19718 | -6.98771 | 3.60E-11 | PLAU     | 4.490298 | 17.84768 | 4.96E-44 |
| ST6GALNAI  | -3.19937 | -9.98748 | 1.76E-19 | CTHRC1   | 4.565173 | 17.08793 | 1.14E-41 |
| ACTA1      | -3.20549 | -4.86425 | 2.25E-06 | PTHLH    | 4.698533 | 12.27519 | 1.73E-26 |
| SLC8A1-AS  | -3.22068 | -18.6588 | 1.57E-46 | FAP      | 4.727096 | 15.62655 | 4.47E-37 |
| HCG22      | -3.26505 | -17.2069 | 4.87E-42 | IFI6     | 4.872446 | 16.33535 | 2.61E-39 |
| CKM        | -3.26923 | -5.65502 | 5.03E-08 | CXCL10   | 4.903219 | 11.92982 | 2.07E-25 |
| C5orf66-AS | -3.27497 | -14.8398 | 1.38E-34 | SERPINE1 | 5.097755 | 15.52477 | 9.37E-37 |
| CYP4B1     | -3.2808  | -12.3291 | 1.17E-26 | GREM1    | 5.246117 | 19.98275 | 1.50E-50 |
| RBM20      | -3.28965 | -18.7875 | 6.33E-47 | CXCL8    | 5.272451 | 13.82639 | 2.23E-31 |
| BPIFB1     | -3.34734 | -5.11359 | 7.08E-07 | MMP10    | 5.920461 | 12.15161 | 4.21E-26 |
| PYGM       | -3.36014 | -9.57477 | 2.91E-18 | MMP12    | 6.527112 | 18.03831 | 1.28E-44 |
| HLF        | -3.37151 | -14.4198 | 2.94E-33 | MMP3     | 6.65594  | 14.82071 | 1.58E-34 |
| GCNT3      | -3.37458 | -10.3371 | 1.59E-20 | MMP1     | 9.096161 | 22.34133 | 1.66E-57 |
| A2ML1      | -3.38099 | -11.002  | 1.52E-22 |          |          |          |          |
| MYH2       | -3.42238 | -5.31675 | 2.68E-07 |          |          |          |          |
| GPD1L      | -3.44047 | -15.6055 | 5.21E-37 |          |          |          |          |
| GALNT12    | -3.46255 | -14.9283 | 7.22E-35 |          |          |          |          |
| PAX9       | -3.46284 | -13.9873 | 6.90E-32 |          |          |          |          |
| ALDH3A1    | -3.48334 | -8.74233 | 7.23E-16 |          |          |          |          |
| AADAC      | -3.51091 | -15.145  | 1.49E-35 |          |          |          |          |
| STATH      | -3.51669 | -5.9579  | 1.06E-08 |          |          |          |          |
| CRCT1      | -3.52158 | -8.1448  | 3.30E-14 |          |          |          |          |
| SMIM5      | -3.52812 | -15.5775 | 6.38E-37 |          |          |          |          |
| GDPD3      | -3.5655  | -12.4276 | 5.76E-27 |          |          |          |          |
| CHRD1      | -3.63949 | -10.5387 | 3.91E-21 |          |          |          |          |
| CRYM       | -3.67952 | -13.9571 | 8.61E-32 |          |          |          |          |
| SNX31      | -3.72591 | -13.9979 | 6.39E-32 |          |          |          |          |
| ETNK2      | -3.76088 | -19.6428 | 1.58E-49 |          |          |          |          |
| VSIG10L    | -3.79023 | -10.7396 | 9.61E-22 |          |          |          |          |
| GBP6       | -3.82769 | -12.3689 | 8.80E-27 |          |          |          |          |
| MYZAP      | -3.84299 | -17.5102 | 5.53E-43 |          |          |          |          |
| PADI1      | -3.84546 | -25.1513 | 2.09E-65 |          |          |          |          |
| ADH7       | -3.86615 | -10.024  | 1.37E-19 |          |          |          |          |
| ZG16B      | -3.8876  | -6.34064 | 1.37E-09 |          |          |          |          |
| FLG        | -3.91013 | -8.67639 | 1.11E-15 |          |          |          |          |
| PSCA       | -3.91476 | -14.9127 | 8.09E-35 |          |          |          |          |
| CYSRT1     | -3.92192 | -10.971  | 1.89E-22 |          |          |          |          |
| FMO9P      | -4.03616 | -19.6885 | 1.15E-49 |          |          |          |          |
| TMPRSS11   | -4.05253 | -9.23723 | 2.79E-17 |          |          |          |          |
| ATP6VOA4   | -4.09692 | -23.4241 | 1.33E-60 |          |          |          |          |
| ANXA9      | -4.10032 | -14.0457 | 4.51E-32 |          |          |          |          |
| CLDN10     | -4.15796 | -8.94584 | 1.91E-16 |          |          |          |          |
| SPINK7     | -4.2637  | -8.04802 | 6.06E-14 |          |          |          |          |
| SPINK5     | -4.29041 | -10.6062 | 2.44E-21 |          |          |          |          |
| MAMDC2     | -4.32441 | -15.2347 | 7.74E-36 |          |          |          |          |

|           |          |          |          |
|-----------|----------|----------|----------|
| KRT4      | -4.33725 | -10.7074 | 1.20E-21 |
| IL36A     | -4.35442 | -15.0266 | 3.53E-35 |
| KRT13     | -4.47405 | -7.58703 | 1.03E-12 |
| ANKRD20A  | -4.49603 | -23.3086 | 2.84E-60 |
| C21orf15  | -4.51054 | -23.8001 | 1.16E-61 |
| SLURP1    | -4.54168 | -8.77155 | 5.98E-16 |
| RHCG      | -4.5512  | -10.7283 | 1.04E-21 |
| LOC100506 | -4.57081 | -20.6166 | 1.90E-52 |
| SH3BGRL2  | -4.61744 | -17.2213 | 4.39E-42 |
| PRSS27    | -4.6196  | -13.1486 | 3.10E-29 |
| CAPN14    | -4.73414 | -12.3894 | 7.58E-27 |
| FAM3B     | -4.78286 | -11.3573 | 1.23E-23 |
| SERPINB11 | -4.93945 | -13.9384 | 9.86E-32 |
| CLCA4     | -5.14307 | -11.3652 | 1.17E-23 |
| FAM3D     | -5.19515 | -13.4299 | 4.01E-30 |
| ENDOU     | -5.27062 | -15.0909 | 2.21E-35 |
| TGM3      | -5.57705 | -10.1696 | 5.04E-20 |
| KRT78     | -5.66483 | -15.9568 | 4.06E-38 |
| LOC441178 | -5.66951 | -22.773  | 9.53E-59 |
| MAL       | -6.40286 | -12.0239 | 1.05E-25 |
| CRNN      | -6.95308 | -10.6888 | 1.37E-21 |

The significantly changed genes of GSE30991

| Downregulated |          |          |          | Upregulated |          |          |          |
|---------------|----------|----------|----------|-------------|----------|----------|----------|
| ID            | logFC    | t        | P.Value  | ID          | logFC    | t        | P.Value  |
| SLC22A17      | -1.0022  | -6.41696 | 9.09E-09 | CYP26B1     | 1.000842 | 7.474499 | 8.53E-11 |
| TEKT3         | -1.0023  | -5.94168 | 6.97E-08 | AURKA       | 1.001106 | 8.750585 | 2.69E-13 |
| LOC646962     | -1.00231 | -4.73481 | 9.32E-06 | FCRLM2      | 1.00111  | 7.027669 | 6.24E-10 |
| SLC8A3        | -1.00237 | -5.50987 | 4.23E-07 | PCSK9       | 1.002332 | 7.457763 | 9.19E-11 |
| CYP2J2        | -1.00273 | -7.98863 | 8.45E-12 | FURIN       | 1.002483 | 7.630495 | 4.24E-11 |
| PFKFB1        | -1.0031  | -7.15181 | 3.60E-10 | RCN3        | 1.003076 | 7.416978 | 1.10E-10 |
| GGT6          | -1.00563 | -6.20794 | 2.24E-08 | SCARB1      | 1.003462 | 6.308216 | 1.45E-08 |
| GHRL          | -1.0065  | -5.68217 | 2.07E-07 | IQCA        | 1.003711 | 3.500209 | 0.000763 |
| GNAT1         | -1.00762 | -6.85918 | 1.31E-09 | C1orf155    | 1.003945 | 9.772148 | 2.66E-15 |
| UNC45B        | -1.00904 | -3.75573 | 0.000326 | TMEM16J     | 1.004218 | 6.007567 | 5.27E-08 |
| SYN2          | -1.00931 | -7.31249 | 1.76E-10 | KRT9        | 1.004259 | 5.851017 | 1.02E-07 |
| FLJ10159      | -1.01141 | -5.38882 | 6.95E-07 | PFKFB4      | 1.005552 | 7.353611 | 1.46E-10 |
| ZNF701        | -1.01207 | -7.0502  | 5.65E-10 | POTE2       | 1.006393 | 3.818602 | 0.000263 |
| SPRR3         | -1.01233 | -5.5984  | 2.94E-07 | BICD1       | 1.007392 | 7.82982  | 1.73E-11 |
| RAB9B         | -1.01414 | -6.30633 | 1.47E-08 | LOC653767   | 1.007416 | 5.623795 | 2.64E-07 |
| MGC62100      | -1.01463 | -5.47551 | 4.87E-07 | KIF2C       | 1.008238 | 5.904558 | 8.15E-08 |
| LIPL1         | -1.01537 | -5.77035 | 1.43E-07 | TTYH3       | 1.008826 | 10.72622 | 3.72E-17 |
| GPD1L         | -1.01587 | -12.1609 | 7.00E-20 | KIF21B      | 1.008945 | 7.68853  | 3.26E-11 |
| PDZRN4        | -1.01707 | -8.36787 | 1.52E-12 | ARID5A      | 1.009402 | 6.118741 | 3.28E-08 |
| MYH13         | -1.01827 | -3.89443 | 0.000203 | TCF3        | 1.009553 | 5.792986 | 1.30E-07 |
| RBM24         | -1.01858 | -4.02509 | 0.000128 | FLJ10815    | 1.010106 | 7.565261 | 5.68E-11 |
| REEP2         | -1.01858 | -7.76127 | 2.35E-11 | B4GALNT3    | 1.01022  | 4.679277 | 1.15E-05 |
| IGSF22        | -1.02096 | -7.93574 | 1.07E-11 | SULT1E1     | 1.010313 | 3.803817 | 0.000277 |
| SIGLECP16     | -1.02131 | -3.75295 | 0.000329 | KIF14       | 1.010475 | 7.414741 | 1.11E-10 |
| NGFRAP1L      | -1.02141 | -4.36129 | 3.81E-05 | BTBD4       | 1.011987 | 6.026291 | 4.87E-08 |
| SFRP5         | -1.02153 | -4.66969 | 1.20E-05 | HOXA2       | 1.013069 | 4.262804 | 5.47E-05 |
| TMEM31        | -1.02169 | -7.50483 | 7.44E-11 | C21orf56    | 1.013249 | 5.232042 | 1.31E-06 |
| CAMK2A        | -1.0242  | -4.79554 | 7.37E-06 | NEU2        | 1.013466 | 3.56484  | 0.000617 |
| C1orf115      | -1.02464 | -6.12526 | 3.19E-08 | NOD3        | 1.015237 | 6.94533  | 8.99E-10 |
| IGSF11        | -1.02507 | -6.31659 | 1.40E-08 | RGS4        | 1.01591  | 5.508908 | 4.25E-07 |
| ANGPT1        | -1.02544 | -4.8061  | 7.08E-06 | GFPT2       | 1.017098 | 4.55109  | 1.88E-05 |
| TSGA2         | -1.02577 | -7.03797 | 5.96E-10 | ROBO4       | 1.017373 | 9.497265 | 9.17E-15 |
| OR7E37P       | -1.0259  | -6.66711 | 3.06E-09 | C14orf73    | 1.017421 | 5.066756 | 2.54E-06 |
| PTPN20A       | -1.02657 | -3.78916 | 0.000291 | FLJ16478    | 1.017937 | 6.47472  | 7.07E-09 |
| C1orf87       | -1.02694 | -9.06965 | 6.34E-14 | C5orf16     | 1.018306 | 5.465863 | 5.07E-07 |
| PDE8B         | -1.02701 | -4.75698 | 8.56E-06 | KIF18A      | 1.018554 | 6.096194 | 3.61E-08 |
| PKIB          | -1.02735 | -5.97016 | 6.18E-08 | GPR68       | 1.020037 | 7.252876 | 2.29E-10 |
| TM7SF2        | -1.02741 | -4.75022 | 8.78E-06 | VNN3        | 1.020215 | 3.066509 | 0.002953 |
| BMP3          | -1.02776 | -7.65674 | 3.76E-11 | CCL18       | 1.020422 | 6.682165 | 2.86E-09 |
| ZNF233        | -1.02795 | -6.54293 | 5.26E-09 | CDC25C      | 1.020712 | 7.097262 | 4.58E-10 |
| NOXA1         | -1.02804 | -4.87654 | 5.38E-06 | ARHGEF17    | 1.021189 | 8.517576 | 7.72E-13 |
| SNORD116      | -1.02886 | -7.97905 | 8.82E-12 | TIGD5       | 1.022763 | 8.764574 | 2.52E-13 |
| ZNF569        | -1.02924 | -6.22439 | 2.09E-08 | MFHAS1      | 1.022827 | 6.59766  | 4.14E-09 |
| PAQR8         | -1.03029 | -7.37887 | 1.31E-10 | ZNF474      | 1.024254 | 5.386605 | 7.01E-07 |

|           |          |          |          |           |          |          |          |
|-----------|----------|----------|----------|-----------|----------|----------|----------|
| NMNAT3    | -1.03129 | -7.39236 | 1.23E-10 | HKDC1     | 1.025864 | 3.876408 | 0.000216 |
| MAB21L2   | -1.03243 | -2.07044 | 0.041632 | KIAA0963  | 1.026045 | 7.809698 | 1.89E-11 |
| CRYAB     | -1.0327  | -9.82882 | 2.06E-15 | C8orf42   | 1.028245 | 5.161851 | 1.74E-06 |
| GPD1      | -1.03405 | -8.46241 | 9.92E-13 | LRFN4     | 1.028312 | 6.543565 | 5.24E-09 |
| AZGP1     | -1.03455 | -3.53368 | 0.000684 | HIST1H2AI | 1.029204 | 5.665828 | 2.22E-07 |
| FLJ30294  | -1.03611 | -5.12162 | 2.04E-06 | GMPPB     | 1.029711 | 7.331634 | 1.61E-10 |
| DIRAS3    | -1.03635 | -9.59064 | 6.02E-15 | HSPG2     | 1.030867 | 6.442558 | 8.13E-09 |
| SLITRK2   | -1.03641 | -6.2844  | 1.61E-08 | NCOA6IP   | 1.031338 | 7.013776 | 6.64E-10 |
| ABCA10    | -1.03652 | -9.36027 | 1.70E-14 | RNASE2    | 1.031907 | 4.454365 | 2.70E-05 |
| PACRG     | -1.03724 | -13.2015 | 8.48E-22 | THOC4     | 1.032293 | 7.743137 | 2.55E-11 |
| PRB3      | -1.03831 | -3.11818 | 0.002528 | HAMP      | 1.032995 | 4.542129 | 1.94E-05 |
| MIA       | -1.03885 | -4.50528 | 2.23E-05 | H2BFS     | 1.032998 | 8.111613 | 4.85E-12 |
| CEL       | -1.03924 | -4.28718 | 5.01E-05 | COL4A1    | 1.034134 | 14.26857 | 1.05E-23 |
| PRKAR2B   | -1.04018 | -6.29599 | 1.53E-08 | APOBEC3B  | 1.034562 | 5.111095 | 2.13E-06 |
| ZNF493    | -1.04083 | -9.0359  | 7.39E-14 | AMZ1      | 1.034703 | 6.816333 | 1.59E-09 |
| TDRD10    | -1.04174 | -8.0274  | 7.09E-12 | CCNF      | 1.034732 | 5.994094 | 5.58E-08 |
| NAALADL2  | -1.04198 | -5.48695 | 4.65E-07 | LGALS3BP  | 1.034974 | 6.835901 | 1.46E-09 |
| SYPL2     | -1.04355 | -5.06541 | 2.56E-06 | TNFSF9    | 1.035855 | 5.016762 | 3.10E-06 |
| FLJ35773  | -1.04374 | -5.64713 | 2.40E-07 | PSG6      | 1.036909 | 4.141373 | 8.49E-05 |
| TCEAL7    | -1.04508 | -5.70565 | 1.88E-07 | MAML1     | 1.037867 | 6.842033 | 1.42E-09 |
| SLC7A4    | -1.04543 | -3.9496  | 0.000167 | HIST1H2AK | 1.038287 | 8.326243 | 1.84E-12 |
| UNQ473    | -1.0481  | -4.86483 | 5.63E-06 | RAB43     | 1.038503 | 7.062739 | 5.34E-10 |
| ACVR2A    | -1.04818 | -8.95477 | 1.07E-13 | FBN2      | 1.03897  | 6.110673 | 3.40E-08 |
| HTR3B     | -1.0497  | -4.72505 | 9.68E-06 | C13orf16  | 1.040005 | 6.230999 | 2.03E-08 |
| PALM      | -1.04973 | -7.47508 | 8.50E-11 | FOXF2     | 1.040265 | 7.437696 | 1.01E-10 |
| LOC390927 | -1.05059 | -5.58012 | 3.17E-07 | HIST1H2AF | 1.04174  | 7.399638 | 1.19E-10 |
| GGTA1     | -1.05104 | -5.55889 | 3.46E-07 | ANPEP     | 1.043742 | 5.319132 | 9.23E-07 |
| ERN2      | -1.05111 | -2.64406 | 0.009853 | HELB      | 1.044175 | 6.295058 | 1.54E-08 |
| RAB17     | -1.05248 | -4.23708 | 6.01E-05 | C1orf186  | 1.044479 | 3.846709 | 0.000239 |
| ANKRD6    | -1.05332 | -9.16619 | 4.10E-14 | KIAA1862  | 1.0451   | 6.622488 | 3.72E-09 |
| MAP1LC3A  | -1.05491 | -7.56182 | 5.76E-11 | XRCC3     | 1.046431 | 8.53403  | 7.17E-13 |
| GPR88     | -1.05716 | -2.99721 | 0.003627 | RELB      | 1.04746  | 6.068675 | 4.06E-08 |
| SMARCD3   | -1.05718 | -8.40641 | 1.28E-12 | GRIA3     | 1.047908 | 5.701844 | 1.91E-07 |
| C1orf64   | -1.05722 | -3.00336 | 0.003562 | ITGA5     | 1.048436 | 11.17082 | 5.21E-18 |
| BPIL3     | -1.05862 | -3.55288 | 0.000642 | SHCBP1    | 1.049168 | 11.11433 | 6.68E-18 |
| LOC440508 | -1.06327 | -7.17973 | 3.18E-10 | PSG1      | 1.050789 | 4.081167 | 0.000105 |
| SAP18     | -1.06468 | -10.572  | 7.38E-17 | PCQAP     | 1.051075 | 9.6787   | 4.04E-15 |
| STRC      | -1.06568 | -6.22245 | 2.10E-08 | CD19      | 1.051684 | 2.808544 | 0.00625  |
| KIAA0644  | -1.06955 | -5.83334 | 1.10E-07 | UNC5A     | 1.051836 | 2.975782 | 0.003862 |
| LOC442715 | -1.07206 | -7.80241 | 1.96E-11 | WNT3      | 1.052714 | 4.735564 | 9.29E-06 |
| KIT       | -1.0724  | -7.73983 | 2.59E-11 | RIN3      | 1.052876 | 7.895805 | 1.28E-11 |
| CA11      | -1.07249 | -6.75142 | 2.11E-09 | BFSP1     | 1.053733 | 5.381498 | 7.16E-07 |
| PLCB4     | -1.07269 | -5.79809 | 1.28E-07 | RCOR2     | 1.05396  | 5.183857 | 1.59E-06 |
| LOC221091 | -1.07282 | -6.27464 | 1.68E-08 | TBL2      | 1.055993 | 9.372331 | 1.61E-14 |
| FUT3      | -1.07349 | -5.64128 | 2.46E-07 | ADCK5     | 1.057181 | 5.518172 | 4.09E-07 |
| MYH1      | -1.07377 | -2.9673  | 0.00396  | GABRR2    | 1.057993 | 7.232269 | 2.52E-10 |
| CEACAM1   | -1.07391 | -6.44828 | 7.94E-09 | CHEK1     | 1.058352 | 7.576643 | 5.39E-11 |

|           |          |          |          |           |          |          |          |
|-----------|----------|----------|----------|-----------|----------|----------|----------|
| CYSLTR1   | -1.07406 | -6.80452 | 1.67E-09 | AYTL2     | 1.058455 | 11.05682 | 8.61E-18 |
| PCDHB6    | -1.07493 | -4.49943 | 2.28E-05 | GBF1      | 1.05881  | 8.186077 | 3.46E-12 |
| C1orf51   | -1.07502 | -5.71327 | 1.82E-07 | CNGB1     | 1.059778 | 6.956681 | 8.55E-10 |
| PTCHD3    | -1.0753  | -7.93486 | 1.08E-11 | BAI2      | 1.059808 | 6.142478 | 2.96E-08 |
| THSD4     | -1.07646 | -6.42499 | 8.78E-09 | SLC15A3   | 1.059913 | 9.333196 | 1.92E-14 |
| MYB       | -1.0782  | -9.61434 | 5.41E-15 | FER1L4    | 1.059945 | 4.945944 | 4.10E-06 |
| GPR63     | -1.08003 | -6.21118 | 2.21E-08 | BCAT1     | 1.061626 | 6.593568 | 4.22E-09 |
| GAS7      | -1.08007 | -8.91442 | 1.28E-13 | FRMD5     | 1.061636 | 6.353908 | 1.19E-08 |
| LDB3      | -1.08016 | -8.76099 | 2.56E-13 | LOC284751 | 1.062904 | 9.463501 | 1.07E-14 |
| TCP10L    | -1.08177 | -10.1056 | 5.93E-16 | HIST1H2BH | 1.063717 | 7.839903 | 1.65E-11 |
| KCNIP4    | -1.08222 | -6.34405 | 1.25E-08 | HAS1      | 1.064082 | 4.41615  | 3.11E-05 |
| LOC136306 | -1.08332 | -4.37211 | 3.66E-05 | VSIG1     | 1.064337 | 7.495094 | 7.77E-11 |
| RNF180    | -1.08349 | -7.56637 | 5.65E-11 | HTR2C     | 1.065605 | 4.963879 | 3.82E-06 |
| SERHL2    | -1.08367 | -5.81546 | 1.19E-07 | LOC440836 | 1.065782 | 6.219481 | 2.13E-08 |
| ATP6V0E2L | -1.08399 | -8.79689 | 2.18E-13 | DKFZp762E | 1.066088 | 5.130002 | 1.98E-06 |
| FCGBP     | -1.08418 | -6.02376 | 4.92E-08 | CXCL1     | 1.066471 | 5.461752 | 5.16E-07 |
| ANKFN1    | -1.08702 | -4.53301 | 2.01E-05 | ODZ3      | 1.067138 | 8.307376 | 2.00E-12 |
| HNMT      | -1.08992 | -9.13336 | 4.75E-14 | LOC348262 | 1.067709 | 7.089699 | 4.74E-10 |
| FXYD1     | -1.09017 | -9.80899 | 2.25E-15 | GSDM1     | 1.067742 | 3.673028 | 0.000431 |
| P2RY14    | -1.09108 | -7.30169 | 1.85E-10 | KLK14     | 1.069463 | 2.432331 | 0.017231 |
| MUM1L1    | -1.09427 | -2.86782 | 0.005281 | FSD1NL    | 1.070057 | 7.977578 | 8.88E-12 |
| HS3ST6    | -1.09465 | -5.15295 | 1.80E-06 | PC        | 1.07069  | 6.314937 | 1.41E-08 |
| GLUL      | -1.0963  | -6.82377 | 1.54E-09 | IRGQ      | 1.070849 | 5.794954 | 1.29E-07 |
| MAPK4     | -1.09683 | -7.46581 | 8.86E-11 | LHFPL2    | 1.072278 | 6.543077 | 5.25E-09 |
| SLURP1    | -1.09772 | -3.33358 | 0.0013   | CLEC12A   | 1.072969 | 5.05545  | 2.66E-06 |
| KERA      | -1.09836 | -5.36887 | 7.54E-07 | KIAA0802  | 1.073386 | 5.546995 | 3.63E-07 |
| COL4A3    | -1.09987 | -3.80621 | 0.000275 | DEFA3     | 1.073696 | 3.233265 | 0.001778 |
| PDCL2     | -1.10002 | -8.84011 | 1.79E-13 | EFNB1     | 1.075519 | 8.839328 | 1.80E-13 |
| CNTN4     | -1.10198 | -7.22671 | 2.58E-10 | ARSI      | 1.075713 | 7.219485 | 2.66E-10 |
| SLC19A3   | -1.10313 | -4.54003 | 1.96E-05 | ARFGAP1   | 1.076557 | 6.994541 | 7.23E-10 |
| ART5      | -1.10319 | -7.96383 | 9.45E-12 | BMPR1B    | 1.077517 | 6.957593 | 8.51E-10 |
| CFD       | -1.10371 | -12.2157 | 5.53E-20 | DPP3      | 1.078271 | 7.295284 | 1.90E-10 |
| LANCL3    | -1.10378 | -6.24621 | 1.90E-08 | SIGLEC12  | 1.07854  | 6.878858 | 1.21E-09 |
| ACADSB    | -1.10471 | -10.2437 | 3.20E-16 | FLJ20105  | 1.078894 | 5.289858 | 1.04E-06 |
| FLJ10986  | -1.105   | -10.1298 | 5.32E-16 | SLC11A1   | 1.079905 | 4.484682 | 2.41E-05 |
| ACSM1     | -1.10566 | -6.12693 | 3.17E-08 | CTLA4     | 1.081892 | 5.622488 | 2.66E-07 |
| SERPINB12 | -1.10589 | -3.02872 | 0.003304 | GRIN3B    | 1.084868 | 6.898657 | 1.10E-09 |
| MMRN1     | -1.10598 | -5.73714 | 1.65E-07 | CPNE5     | 1.085567 | 4.930505 | 4.36E-06 |
| TCEA3     | -1.10608 | -8.79309 | 2.22E-13 | CHPF      | 1.085574 | 6.453682 | 7.75E-09 |
| PDGFRL    | -1.10658 | -4.83419 | 6.35E-06 | CCDC11    | 1.085695 | 5.437675 | 5.69E-07 |
| C20orf191 | -1.10703 | -4.73132 | 9.45E-06 | LRAP      | 1.087291 | 4.58261  | 1.67E-05 |
| SILV      | -1.10955 | -3.785   | 0.000295 | EXO1      | 1.087651 | 7.100948 | 4.51E-10 |
| IGF1      | -1.11086 | -5.88206 | 8.97E-08 | C9orf32   | 1.088383 | 6.802524 | 1.69E-09 |
| SH3GL3    | -1.11108 | -4.71887 | 9.91E-06 | CNTROB    | 1.089184 | 7.40793  | 1.15E-10 |
| SAMD13    | -1.11142 | -5.62728 | 2.60E-07 | CD109     | 1.089792 | 6.063611 | 4.15E-08 |
| DNAH7     | -1.11164 | -3.92781 | 0.000181 | FCGR1A    | 1.089968 | 4.720229 | 9.86E-06 |
| RGS11     | -1.11167 | -7.53841 | 6.40E-11 | PDIA5     | 1.09053  | 11.82087 | 3.04E-19 |

|           |          |          |          |           |          |          |          |
|-----------|----------|----------|----------|-----------|----------|----------|----------|
| PGR       | -1.11277 | -5.89901 | 8.35E-08 | ATP8A2    | 1.0908   | 8.397482 | 1.33E-12 |
| SMAD9     | -1.11289 | -8.27577 | 2.31E-12 | FBXL6     | 1.091068 | 7.162478 | 3.43E-10 |
| FYCO1     | -1.11315 | -7.67431 | 3.48E-11 | SOLH      | 1.092042 | 7.660615 | 3.70E-11 |
| SLC25A4   | -1.11345 | -9.15564 | 4.30E-14 | CCNL2     | 1.094142 | 5.917687 | 7.71E-08 |
| LRRC3B    | -1.11347 | -6.17753 | 2.55E-08 | SLC4A3    | 1.09417  | 7.098288 | 4.56E-10 |
| TTY2      | -1.11387 | -5.1495  | 1.83E-06 | APH1B     | 1.095379 | 9.553019 | 7.13E-15 |
| ARG1      | -1.11395 | -2.70848 | 0.008262 | COX6B2    | 1.095813 | 5.736357 | 1.65E-07 |
| IL33      | -1.11505 | -5.01715 | 3.10E-06 | ITGA11    | 1.095978 | 4.445041 | 2.79E-05 |
| NELL1     | -1.11527 | -5.18353 | 1.60E-06 | PHC2      | 1.095995 | 6.718156 | 2.44E-09 |
| URB       | -1.11644 | -6.4433  | 8.11E-09 | EME1      | 1.096093 | 8.202147 | 3.22E-12 |
| TLR5      | -1.11676 | -7.28816 | 1.96E-10 | LOC65360C | 1.09631  | 3.874379 | 0.000217 |
| LIFR      | -1.11731 | -8.25651 | 2.52E-12 | DYSF      | 1.097552 | 8.554205 | 6.54E-13 |
| C9orf58   | -1.11773 | -6.35852 | 1.17E-08 | EPIM      | 1.09799  | 8.31661  | 1.92E-12 |
| MUC15     | -1.11856 | -6.43881 | 8.27E-09 | OR10A3    | 1.099142 | 6.577247 | 4.53E-09 |
| NIPSNAP3E | -1.11877 | -9.06643 | 6.43E-14 | LMNB2     | 1.100437 | 6.327442 | 1.34E-08 |
| GSTM2     | -1.11989 | -5.70947 | 1.85E-07 | DKFZp434k | 1.100506 | 7.783414 | 2.13E-11 |
| LOC65023C | -1.12096 | -5.90017 | 8.31E-08 | TNFRSF4   | 1.101278 | 6.71101  | 2.52E-09 |
| MYH8      | -1.12109 | -2.99535 | 0.003647 | GREM1     | 1.101678 | 6.798165 | 1.72E-09 |
| LOC44104C | -1.12155 | -5.46246 | 5.14E-07 | STK10     | 1.101722 | 8.554524 | 6.53E-13 |
| FMO5      | -1.1224  | -5.39564 | 6.76E-07 | HAP1      | 1.102052 | 6.363475 | 1.15E-08 |
| TCBA1     | -1.1259  | -3.969   | 0.000156 | OLFM2     | 1.103178 | 4.232741 | 6.10E-05 |
| DNAH1     | -1.12615 | -9.04798 | 6.99E-14 | DHCR7     | 1.10343  | 7.166668 | 3.37E-10 |
| ACOX2     | -1.12689 | -7.7226  | 2.80E-11 | RP1       | 1.10562  | 6.47897  | 6.94E-09 |
| ABCA9     | -1.12795 | -8.28191 | 2.24E-12 | INSM2     | 1.105733 | 5.801547 | 1.26E-07 |
| BEXL1     | -1.13084 | -10.4693 | 1.17E-16 | CITED4    | 1.105765 | 5.171842 | 1.67E-06 |
| TSGA10    | -1.13174 | -6.14791 | 2.90E-08 | HOXB3     | 1.10617  | 5.966487 | 6.27E-08 |
| ZNF610    | -1.13205 | -6.21518 | 2.17E-08 | WFDC12    | 1.106392 | 2.723765 | 0.00792  |
| ZNF350    | -1.1321  | -7.26306 | 2.19E-10 | SHD       | 1.107409 | 4.182922 | 7.31E-05 |
| FLJ23577  | -1.13379 | -10.7053 | 4.08E-17 | AP2M1     | 1.10851  | 9.215778 | 3.27E-14 |
| CEACAM5   | -1.13387 | -4.65901 | 1.25E-05 | TRIO      | 1.109087 | 6.74548  | 2.17E-09 |
| ZNF662    | -1.13518 | -8.2873  | 2.19E-12 | TCOF1     | 1.109136 | 9.339957 | 1.87E-14 |
| DIRAS2    | -1.13537 | -5.63644 | 2.51E-07 | NELL2     | 1.111457 | 5.233163 | 1.31E-06 |
| FRZB      | -1.13564 | -8.52312 | 7.53E-13 | REG1A     | 1.111751 | 3.339853 | 0.001275 |
| FLJ30058  | -1.13659 | -4.77524 | 7.98E-06 | CENPO     | 1.113038 | 6.381681 | 1.06E-08 |
| SLC1A7    | -1.13696 | -5.0075  | 3.22E-06 | REC8L1    | 1.114734 | 8.278369 | 2.28E-12 |
| DNALI1    | -1.13782 | -6.33092 | 1.32E-08 | ZIC5      | 1.117242 | 5.633952 | 2.53E-07 |
| ZFP3      | -1.13804 | -6.98953 | 7.39E-10 | HLA-H     | 1.117538 | 4.946425 | 4.09E-06 |
| LOR       | -1.13871 | -2.16544 | 0.033329 | NAT11     | 1.119133 | 7.552701 | 6.01E-11 |
| SPINK7    | -1.13881 | -3.67571 | 0.000427 | OR2B6     | 1.119661 | 6.82302  | 1.54E-09 |
| NDST3     | -1.13893 | -6.77323 | 1.92E-09 | FLJ23657  | 1.12032  | 4.268792 | 5.35E-05 |
| TFF1      | -1.13893 | -3.13258 | 0.00242  | HSPC049   | 1.120393 | 6.416007 | 9.13E-09 |
| GLRB      | -1.13902 | -4.45985 | 2.64E-05 | XPNPEP3   | 1.121389 | 7.403302 | 1.17E-10 |
| C1orf175  | -1.13995 | -5.76701 | 1.45E-07 | ADA       | 1.123014 | 7.173126 | 3.27E-10 |
| SELP      | -1.14056 | -4.72617 | 9.64E-06 | CCDC57    | 1.123108 | 6.763518 | 2.00E-09 |
| ANKAR     | -1.14295 | -10.0232 | 8.59E-16 | ITGB4     | 1.123876 | 11.31298 | 2.79E-18 |
| ZCWPW2    | -1.14345 | -10.8857 | 1.83E-17 | TMEM104   | 1.124281 | 8.535574 | 7.12E-13 |
| XK        | -1.14415 | -5.88535 | 8.84E-08 | KCNE4     | 1.124322 | 7.006488 | 6.86E-10 |

|         |          |          |          |           |          |          |          |
|---------|----------|----------|----------|-----------|----------|----------|----------|
| LRRIQ1  | -1.14601 | -4.42058 | 3.06E-05 | SH2D2A    | 1.124409 | 7.738358 | 2.61E-11 |
| RELN    | -1.14735 | -7.79931 | 1.98E-11 | DNAJC11   | 1.124442 | 7.541375 | 6.32E-11 |
| TSPYL5  | -1.14797 | -5.87772 | 9.13E-08 | CACNA1H   | 1.127023 | 7.544338 | 6.23E-11 |
| PLUNC   | -1.14812 | -2.30543 | 0.02373  | DUSP5P    | 1.128059 | 6.597414 | 4.15E-09 |
| SOX8    | -1.14913 | -5.96351 | 6.35E-08 | QPCTL     | 1.129598 | 5.343781 | 8.35E-07 |
| ASTN    | -1.14917 | -6.29078 | 1.57E-08 | RDH16     | 1.13052  | 6.251773 | 1.86E-08 |
| ARMETL1 | -1.15017 | -8.58471 | 5.70E-13 | PLA2G4E   | 1.131329 | 3.509407 | 0.00074  |
| ACP6    | -1.15045 | -7.37596 | 1.32E-10 | LCE2A     | 1.131509 | 2.240715 | 0.027813 |
| LMOD1   | -1.15068 | -5.61379 | 2.75E-07 | DEFA1     | 1.131783 | 3.25086  | 0.001684 |
| KRTHB5  | -1.15175 | -3.2832  | 0.001523 | FLCN      | 1.13185  | 7.519136 | 6.98E-11 |
| ACACB   | -1.15196 | -8.02876 | 7.05E-12 | IL1F10    | 1.132046 | 3.17763  | 0.00211  |
| B3GALT2 | -1.15203 | -6.87875 | 1.21E-09 | ADAMTS14  | 1.132956 | 10.60231 | 6.45E-17 |
| MOSC2   | -1.15205 | -8.72953 | 2.96E-13 | CSPG4     | 1.133851 | 8.674036 | 3.80E-13 |
| SHRM    | -1.15722 | -6.25072 | 1.86E-08 | MAF1      | 1.134206 | 7.624845 | 4.34E-11 |
| HTR2B   | -1.15866 | -4.37993 | 3.56E-05 | RPS6KA4   | 1.134281 | 7.601544 | 4.82E-11 |
| ODF4    | -1.159   | -5.4312  | 5.84E-07 | MCM2      | 1.135594 | 6.548568 | 5.13E-09 |
| KLRF1   | -1.15918 | -5.76829 | 1.45E-07 | C6orf10   | 1.137714 | 4.273904 | 5.25E-05 |
| LRRN1   | -1.15994 | -4.0944  | 0.0001   | OTOF      | 1.138315 | 5.545574 | 3.65E-07 |
| ARPP-21 | -1.16081 | -3.41702 | 0.000997 | LAMB3     | 1.141915 | 9.297358 | 2.26E-14 |
| MTMR7   | -1.16132 | -7.38491 | 1.27E-10 | BIK       | 1.143805 | 6.43678  | 8.34E-09 |
| CTSG    | -1.16143 | -6.55071 | 5.08E-09 | OGFR      | 1.145221 | 7.256707 | 2.26E-10 |
| SOD3    | -1.16276 | -4.55581 | 1.84E-05 | ZNFX1     | 1.145806 | 9.244002 | 2.88E-14 |
| LRP16   | -1.16384 | -6.60559 | 4.00E-09 | SPC24     | 1.146326 | 8.425589 | 1.17E-12 |
| NNAT    | -1.16481 | -4.03029 | 0.000126 | FKBP10    | 1.147652 | 5.714072 | 1.81E-07 |
| BCHE    | -1.16767 | -4.68248 | 1.14E-05 | SLC13A5   | 1.148304 | 2.639145 | 0.009985 |
| GSTM1   | -1.16786 | -5.03024 | 2.94E-06 | MELK      | 1.148713 | 7.482483 | 8.23E-11 |
| RLN2    | -1.16903 | -6.55551 | 4.98E-09 | SH2D3C    | 1.149997 | 9.788931 | 2.46E-15 |
| GABRB3  | -1.16936 | -6.31775 | 1.40E-08 | SPON2     | 1.150676 | 5.37266  | 7.42E-07 |
| TUBB2B  | -1.16946 | -5.79381 | 1.30E-07 | HLA-F     | 1.151131 | 4.662824 | 1.23E-05 |
| KRTHA3B | -1.17003 | -2.91083 | 0.004666 | CACNA1C   | 1.151793 | 9.759747 | 2.81E-15 |
| ZNF420  | -1.17203 | -9.07599 | 6.16E-14 | AGTRAP    | 1.152561 | 10.77776 | 2.96E-17 |
| XLKD1   | -1.17211 | -8.46053 | 1.00E-12 | ENTPD6    | 1.152588 | 9.638508 | 4.85E-15 |
| PDGFD   | -1.17259 | -5.48759 | 4.64E-07 | MYBPHL    | 1.152658 | 4.656451 | 1.26E-05 |
| SHC4    | -1.17287 | -4.82957 | 6.46E-06 | TMEM26    | 1.154154 | 6.09686  | 3.60E-08 |
| WFDC6   | -1.17352 | -6.33242 | 1.31E-08 | WISP3     | 1.155272 | 4.200631 | 6.86E-05 |
| ZNF568  | -1.17371 | -11.0959 | 7.25E-18 | ERG       | 1.158019 | 9.699591 | 3.68E-15 |
| KLK1    | -1.17413 | -4.34082 | 4.11E-05 | TNFAIP8L1 | 1.158836 | 9.879599 | 1.64E-15 |
| CYP2C18 | -1.17414 | -4.16469 | 7.81E-05 | POU3F1    | 1.158838 | 7.388003 | 1.26E-10 |
| EPB49   | -1.17477 | -8.21107 | 3.09E-12 | MPP4      | 1.162549 | 4.304118 | 4.71E-05 |
| CAPS2   | -1.1752  | -7.06962 | 5.18E-10 | PTPRR     | 1.165013 | 7.397787 | 1.20E-10 |
| PRH2    | -1.1786  | -3.2288  | 0.001803 | GLT25D1   | 1.165523 | 5.869517 | 9.45E-08 |
| GFRA3   | -1.18033 | -4.51199 | 2.18E-05 | MMP19     | 1.167456 | 6.185365 | 2.47E-08 |
| KRT33A  | -1.18119 | -5.3097  | 9.59E-07 | E2F7      | 1.168721 | 5.930553 | 7.31E-08 |
| CMYA1   | -1.18445 | -3.97172 | 0.000155 | MYO7A     | 1.169368 | 6.717224 | 2.45E-09 |
| TDRD5   | -1.1845  | -2.8992  | 0.004826 | KIF17     | 1.169417 | 8.718957 | 3.10E-13 |
| CBLN4   | -1.18493 | -4.15451 | 8.10E-05 | IFNK      | 1.172254 | 5.089252 | 2.33E-06 |
| SLCO4C1 | -1.18577 | -5.31154 | 9.52E-07 | UBE2C     | 1.174103 | 9.22609  | 3.12E-14 |



|           |          |          |          |           |          |          |          |
|-----------|----------|----------|----------|-----------|----------|----------|----------|
| GPR81     | -1.18808 | -5.12148 | 2.05E-06 | GPR153    | 1.177639 | 7.220233 | 2.65E-10 |
| BNC2      | -1.19004 | -6.95125 | 8.75E-10 | C20orf75  | 1.177775 | 5.949859 | 6.73E-08 |
| CCL16     | -1.19124 | -8.45396 | 1.03E-12 | HDAC10    | 1.177878 | 6.656961 | 3.20E-09 |
| KCNK12    | -1.19323 | -4.94126 | 4.18E-06 | TRIP13    | 1.177949 | 8.704833 | 3.31E-13 |
| SLC30A8   | -1.19444 | -4.20092 | 6.85E-05 | ARPC1B    | 1.183678 | 9.122528 | 4.99E-14 |
| PDE1A     | -1.19449 | -8.30509 | 2.02E-12 | EHMT1     | 1.183805 | 5.489618 | 4.60E-07 |
| OCLN      | -1.19497 | -5.6095  | 2.80E-07 | PPARD     | 1.185417 | 7.170541 | 3.31E-10 |
| PTGER3    | -1.19574 | -6.01696 | 5.06E-08 | PYCARD    | 1.185573 | 6.549048 | 5.12E-09 |
| PRDM16    | -1.19604 | -6.6102  | 3.92E-09 | ZFP64     | 1.185718 | 9.676486 | 4.09E-15 |
| FGF13     | -1.19655 | -5.57829 | 3.19E-07 | C14orf151 | 1.186057 | 5.980257 | 5.92E-08 |
| LOC653685 | -1.19717 | -4.60615 | 1.52E-05 | KIF3C     | 1.186438 | 5.592746 | 3.01E-07 |
| LOC130940 | -1.19739 | -4.4222  | 3.04E-05 | RECQL4    | 1.186601 | 4.364176 | 3.77E-05 |
| RBP7      | -1.19902 | -9.3605  | 1.70E-14 | PLEK2     | 1.188021 | 8.442972 | 1.08E-12 |
| PSCA      | -1.19906 | -3.67104 | 0.000434 | LILRA3    | 1.189313 | 4.811539 | 6.93E-06 |
| MEOX2     | -1.20201 | -8.27202 | 2.35E-12 | FST       | 1.189815 | 9.01994  | 7.94E-14 |
| SYT8      | -1.20305 | -3.8179  | 0.000264 | GYLTL1B   | 1.189953 | 8.707755 | 3.26E-13 |
| LRRN5     | -1.205   | -7.36155 | 1.41E-10 | AQP10     | 1.19056  | 4.15323  | 8.14E-05 |
| SOX5      | -1.20566 | -8.10906 | 4.90E-12 | ABCD1     | 1.191586 | 8.490784 | 8.72E-13 |
| ALDH3A1   | -1.20622 | -7.04076 | 5.89E-10 | CARD10    | 1.192602 | 8.094048 | 5.25E-12 |
| RNF165    | -1.20661 | -5.08032 | 2.41E-06 | HERC2P2   | 1.192844 | 5.798312 | 1.28E-07 |
| TNNI3K    | -1.20668 | -7.46399 | 8.94E-11 | TMEM132A  | 1.197442 | 10.29731 | 2.51E-16 |
| TRHDE     | -1.20964 | -3.22598 | 0.001819 | ARSB      | 1.20189  | 8.886165 | 1.45E-13 |
| GCHFR     | -1.21228 | -6.02427 | 4.91E-08 | TSPAN10   | 1.20366  | 7.284496 | 1.99E-10 |
| FAM55D    | -1.21296 | -3.74377 | 0.00034  | C10orf80  | 1.207596 | 5.327288 | 8.93E-07 |
| CLEC4F    | -1.21558 | -4.62072 | 1.44E-05 | FLJ16008  | 1.211681 | 9.633336 | 4.96E-15 |
| DKFZP564C | -1.21634 | -7.88892 | 1.32E-11 | OSM       | 1.211919 | 4.517546 | 2.13E-05 |
| ZNF396    | -1.21641 | -7.7609  | 2.36E-11 | PLEC1     | 1.212707 | 8.452853 | 1.04E-12 |
| MAMDC2    | -1.21907 | -8.53295 | 7.21E-13 | CXCL10    | 1.213728 | 5.754393 | 1.53E-07 |
| C9orf125  | -1.21945 | -4.96806 | 3.76E-06 | LOC653170 | 1.214412 | 8.444483 | 1.08E-12 |
| PYGO1     | -1.22042 | -7.93657 | 1.07E-11 | IKIP      | 1.215676 | 11.96042 | 1.66E-19 |
| CBLN1     | -1.22061 | -3.81752 | 0.000264 | CAMTA2    | 1.216067 | 7.031381 | 6.14E-10 |
| FNDC4     | -1.22263 | -5.83219 | 1.11E-07 | IFNB1     | 1.216519 | 6.589776 | 4.29E-09 |
| FLJ90586  | -1.22547 | -5.85432 | 1.01E-07 | RPS7      | 1.219641 | 5.523933 | 3.99E-07 |
| FAM70A    | -1.22676 | -7.85603 | 1.54E-11 | XTP7      | 1.219709 | 7.188902 | 3.05E-10 |
| LEFTY2    | -1.2289  | -6.62911 | 3.61E-09 | PPP1R9B   | 1.220119 | 7.261799 | 2.21E-10 |
| RORC      | -1.2313  | -6.62817 | 3.62E-09 | LOC653490 | 1.220779 | 8.647676 | 4.29E-13 |
| MRAP      | -1.23391 | -5.63991 | 2.47E-07 | PNPLA1    | 1.221189 | 4.20749  | 6.69E-05 |
| ZNF651    | -1.23634 | -9.5302  | 7.90E-15 | GPR97     | 1.221243 | 5.185132 | 1.59E-06 |
| FXVD6     | -1.23707 | -6.64208 | 3.41E-09 | LBH       | 1.221506 | 8.243302 | 2.67E-12 |
| MYLK2     | -1.23917 | -4.72104 | 9.83E-06 | CELSR3    | 1.221529 | 8.385638 | 1.40E-12 |
| KCTD8     | -1.23941 | -6.96585 | 8.21E-10 | KLC2      | 1.222833 | 7.326019 | 1.66E-10 |
| LOC619208 | -1.23954 | -8.12338 | 4.60E-12 | MATN3     | 1.224007 | 12.03345 | 1.21E-19 |
| C10orf71  | -1.24085 | -4.87311 | 5.45E-06 | LOC654052 | 1.22587  | 7.6123   | 4.60E-11 |
| ZNF447    | -1.24092 | -9.86193 | 1.77E-15 | TPX2      | 1.226318 | 8.205894 | 3.17E-12 |
| MGC34647  | -1.24108 | -5.7851  | 1.35E-07 | FAM38B    | 1.228085 | 8.278334 | 2.28E-12 |
| ANKRD20A  | -1.24142 | -9.88686 | 1.58E-15 | EPSTI1    | 1.229097 | 8.676829 | 3.76E-13 |
| SDPR      | -1.24152 | -9.47361 | 1.02E-14 | GTSE1     | 1.229113 | 7.731171 | 2.69E-11 |

|          |          |          |          |           |          |          |          |
|----------|----------|----------|----------|-----------|----------|----------|----------|
| KLHL14   | -1.24243 | -5.46406 | 5.11E-07 | ODF3L1    | 1.230286 | 7.409067 | 1.14E-10 |
| MGC35212 | -1.24271 | -4.89673 | 4.97E-06 | BCAM      | 1.230723 | 7.926792 | 1.12E-11 |
| KIF5C    | -1.24354 | -8.07518 | 5.71E-12 | IGF1R     | 1.231688 | 7.533403 | 6.55E-11 |
| FMN2     | -1.24354 | -7.87716 | 1.40E-11 | CD274     | 1.23231  | 5.796862 | 1.28E-07 |
| KRTAP9-4 | -1.24586 | -2.90917 | 0.004689 | ST3GAL2   | 1.233464 | 7.811924 | 1.87E-11 |
| RALGPS1  | -1.24699 | -12.4577 | 1.96E-20 | TRAF2     | 1.234608 | 6.188528 | 2.43E-08 |
| C9orf96  | -1.25026 | -9.39449 | 1.46E-14 | BCAR1     | 1.234791 | 11.465   | 1.43E-18 |
| RNF175   | -1.25176 | -7.83368 | 1.70E-11 | DAB2IP    | 1.234865 | 11.19556 | 4.67E-18 |
| MGC42367 | -1.25211 | -7.13968 | 3.80E-10 | LOC388385 | 1.234919 | 7.463327 | 8.96E-11 |
| SYT13    | -1.25254 | -2.89771 | 0.004846 | PDE7A     | 1.235072 | 11.28704 | 3.13E-18 |
| FBN3     | -1.25342 | -4.37738 | 3.59E-05 | CORO1A    | 1.235102 | 6.824758 | 1.53E-09 |
| ZNF435   | -1.25487 | -7.81691 | 1.83E-11 | FADS1     | 1.237177 | 7.492073 | 7.88E-11 |
| MYH7B    | -1.25657 | -5.9832  | 5.84E-08 | STC2      | 1.238683 | 10.13312 | 5.24E-16 |
| TMEM38A  | -1.25811 | -5.1244  | 2.02E-06 | MYO3B     | 1.242418 | 5.467221 | 5.04E-07 |
| ASIP     | -1.25886 | -4.57314 | 1.73E-05 | DSG2      | 1.242444 | 6.238119 | 1.97E-08 |
| DRD1IP   | -1.26076 | -6.71857 | 2.44E-09 | LOC653755 | 1.242861 | 7.46223  | 9.01E-11 |
| SLC27A2  | -1.26116 | -6.18697 | 2.45E-08 | KIF23     | 1.243779 | 7.69744  | 3.14E-11 |
| SCN11A   | -1.26126 | -6.44969 | 7.89E-09 | NETO1     | 1.244572 | 8.006406 | 7.79E-12 |
| ZNF347   | -1.26208 | -9.08877 | 5.81E-14 | HOXA9     | 1.245167 | 8.352441 | 1.63E-12 |
| RXRG     | -1.26239 | -6.85623 | 1.33E-09 | LOC653705 | 1.245358 | 9.257854 | 2.71E-14 |
| KRT7     | -1.26278 | -3.2216  | 0.001843 | SLC6A2    | 1.246062 | 7.730276 | 2.71E-11 |
| DEFB104B | -1.26434 | -5.9843  | 5.82E-08 | FZD2      | 1.247189 | 6.771538 | 1.93E-09 |
| PKIA     | -1.26521 | -7.94413 | 1.03E-11 | METRNL    | 1.248109 | 7.05314  | 5.58E-10 |
| C10orf13 | -1.26542 | -9.82624 | 2.08E-15 | DENND1A   | 1.249963 | 9.933307 | 1.29E-15 |
| KCNH8    | -1.26565 | -7.10261 | 4.48E-10 | PPP1R14C  | 1.250564 | 6.505938 | 6.18E-09 |
| KIAA1683 | -1.26609 | -9.38707 | 1.51E-14 | OR2L8     | 1.252668 | 6.528452 | 5.60E-09 |
| RYR3     | -1.26758 | -4.82487 | 6.58E-06 | LTBP1     | 1.253442 | 8.744895 | 2.76E-13 |
| NRG2     | -1.26801 | -14.0106 | 3.00E-23 | SEMA7A    | 1.253524 | 6.196772 | 2.35E-08 |
| SCARA3   | -1.26838 | -9.33165 | 1.94E-14 | PEX10     | 1.254322 | 7.32819  | 1.64E-10 |
| FHL5     | -1.26857 | -5.42122 | 6.09E-07 | UBTD1     | 1.255725 | 7.13521  | 3.87E-10 |
| DPP6     | -1.27137 | -5.69239 | 1.99E-07 | PDPN      | 1.256143 | 14.31412 | 8.74E-24 |
| ZNF626   | -1.2714  | -12.1465 | 7.45E-20 | ACP5      | 1.258326 | 7.357507 | 1.44E-10 |
| CD40LG   | -1.27196 | -5.13055 | 1.97E-06 | BAX       | 1.259857 | 9.680032 | 4.02E-15 |
| ADPRHL1  | -1.27221 | -7.15787 | 3.50E-10 | IL4I1     | 1.259943 | 7.862783 | 1.49E-11 |
| ZMYND12  | -1.27269 | -6.55141 | 5.07E-09 | MKL1      | 1.260502 | 8.454598 | 1.03E-12 |
| KLF15    | -1.27351 | -7.95895 | 9.66E-12 | SP8       | 1.26168  | 5.562146 | 3.41E-07 |
| CLDN17   | -1.27386 | -3.08087 | 0.002828 | BMP1      | 1.265303 | 13.59447 | 1.66E-22 |
| MGAT4C   | -1.27447 | -7.4192  | 1.09E-10 | C6orf150  | 1.266368 | 11.36927 | 2.18E-18 |
| CH25H    | -1.27461 | -5.38133 | 7.17E-07 | NOD27     | 1.267076 | 9.005301 | 8.48E-14 |
| VSIG2    | -1.27502 | -5.40105 | 6.61E-07 | LEPRE1    | 1.267446 | 12.50953 | 1.57E-20 |
| SLC6A16  | -1.27527 | -7.79825 | 1.99E-11 | HOXC10    | 1.269112 | 7.076776 | 5.02E-10 |
| MGC48915 | -1.27565 | -5.31624 | 9.34E-07 | DERL3     | 1.270937 | 5.371554 | 7.46E-07 |
| MYO5C    | -1.27723 | -10.2729 | 2.80E-16 | KIF20A    | 1.272247 | 6.192875 | 2.39E-08 |
| ARSG     | -1.27756 | -11.8829 | 2.32E-19 | ANXA13    | 1.272291 | 7.325875 | 1.66E-10 |
| CLDN7    | -1.27784 | -3.18462 | 0.002065 | ZP4       | 1.272461 | 6.421139 | 8.93E-09 |
| ADHFE1   | -1.28017 | -8.96747 | 1.01E-13 | HIST1H3G  | 1.275695 | 6.923551 | 9.89E-10 |
| ATOX8    | -1.28096 | -5.94158 | 6.97E-08 | LYPD1     | 1.276086 | 7.765897 | 2.30E-11 |

|           |          |          |          |           |          |          |          |
|-----------|----------|----------|----------|-----------|----------|----------|----------|
| EFCBP1    | -1.28125 | -6.55118 | 5.07E-09 | PCDH7     | 1.276336 | 9.691863 | 3.81E-15 |
| FOLR1     | -1.2836  | -3.31259 | 0.001389 | TM7SF4    | 1.278988 | 5.724361 | 1.74E-07 |
| AS3MT     | -1.28567 | -9.20048 | 3.51E-14 | CNTNAP2   | 1.281979 | 3.497608 | 0.000769 |
| ROPN1     | -1.28787 | -2.91844 | 0.004565 | SH3TC1    | 1.28262  | 8.063271 | 6.03E-12 |
| MAN1C1    | -1.28864 | -8.23041 | 2.83E-12 | LIPG      | 1.283304 | 5.354207 | 8.00E-07 |
| GYS2      | -1.29053 | -6.66129 | 3.14E-09 | PXDN      | 1.283596 | 11.55245 | 9.78E-19 |
| ACPP      | -1.29067 | -7.47494 | 8.51E-11 | SLC2A9    | 1.284959 | 10.47543 | 1.14E-16 |
| SARM1     | -1.29119 | -8.85591 | 1.67E-13 | GAST      | 1.2871   | 8.767587 | 2.49E-13 |
| K5B       | -1.29128 | -5.3731  | 7.41E-07 | C22orf5   | 1.288408 | 10.50049 | 1.02E-16 |
| SYTL4     | -1.29168 | -11.2984 | 2.97E-18 | GPR176    | 1.289726 | 8.005776 | 7.82E-12 |
| NUDT10    | -1.29403 | -7.23486 | 2.49E-10 | GDPD2     | 1.291859 | 5.071642 | 2.49E-06 |
| NTF3      | -1.2945  | -7.12135 | 4.12E-10 | LOC653762 | 1.29239  | 5.637435 | 2.50E-07 |
| F8        | -1.29564 | -9.73358 | 3.16E-15 | KIRREL    | 1.294396 | 8.653906 | 4.17E-13 |
| ETNK2     | -1.29856 | -5.74818 | 1.57E-07 | HOXD9     | 1.297102 | 10.28048 | 2.71E-16 |
| KCNJ13    | -1.30032 | -6.5743  | 4.59E-09 | TGIF      | 1.297369 | 9.477017 | 1.00E-14 |
| CPNE4     | -1.30192 | -8.50329 | 8.24E-13 | CHTF18    | 1.29739  | 7.82034  | 1.80E-11 |
| TNXB      | -1.3023  | -10.0398 | 7.97E-16 | LILRB4    | 1.299562 | 4.998724 | 3.33E-06 |
| MYOZ2     | -1.30434 | -4.43898 | 2.86E-05 | ALG1      | 1.299722 | 8.741883 | 2.80E-13 |
| LRFN2     | -1.30447 | -4.74431 | 8.99E-06 | PRKAR1B   | 1.300009 | 7.359708 | 1.42E-10 |
| ZNF433    | -1.30528 | -7.23142 | 2.53E-10 | HOXB5     | 1.30027  | 5.691118 | 2.00E-07 |
| C10orf81  | -1.30634 | -3.15336 | 0.002272 | FAM64A    | 1.303169 | 5.008994 | 3.20E-06 |
| C3orf57   | -1.30683 | -5.03881 | 2.84E-06 | HK3       | 1.305624 | 6.853746 | 1.35E-09 |
| TTN       | -1.30729 | -4.78343 | 7.73E-06 | SLC6A11   | 1.306336 | 6.079464 | 3.88E-08 |
| TEX101    | -1.30876 | -4.36206 | 3.80E-05 | ACRV1     | 1.306536 | 5.082506 | 2.39E-06 |
| BCAS1     | -1.30921 | -5.33991 | 8.48E-07 | LRRC50    | 1.30718  | 6.029647 | 4.80E-08 |
| CUL3      | -1.31008 | -9.70417 | 3.61E-15 | GLDC      | 1.309281 | 3.740431 | 0.000344 |
| RGS9BP    | -1.31247 | -6.46066 | 7.52E-09 | PIF1      | 1.310423 | 6.516485 | 5.90E-09 |
| VMD2L3    | -1.31345 | -4.33567 | 4.19E-05 | GLIPR1    | 1.311383 | 8.527765 | 7.38E-13 |
| DLGAP2    | -1.31376 | -7.96658 | 9.33E-12 | RNPC1     | 1.311916 | 7.511314 | 7.23E-11 |
| C6orf194  | -1.31459 | -9.79695 | 2.37E-15 | F2RL3     | 1.312189 | 12.72985 | 6.17E-21 |
| TMC4      | -1.31626 | -7.22655 | 2.58E-10 | CPZ       | 1.3164   | 7.630989 | 4.23E-11 |
| FLJ26175  | -1.31689 | -10.3161 | 2.31E-16 | SLC7A8    | 1.316529 | 8.782512 | 2.33E-13 |
| ZDHC11    | -1.31763 | -8.80334 | 2.12E-13 | HIST1H1A  | 1.317337 | 5.035969 | 2.87E-06 |
| SLC38A3   | -1.31773 | -6.39041 | 1.02E-08 | HIST1H1D  | 1.318959 | 8.498271 | 8.43E-13 |
| ABCB1     | -1.31943 | -5.82929 | 1.12E-07 | P2RX4     | 1.320618 | 7.168941 | 3.33E-10 |
| N4BP3     | -1.31979 | -7.45203 | 9.43E-11 | CYP2D6    | 1.320902 | 6.721244 | 2.41E-09 |
| UGT1A8    | -1.32069 | -7.193   | 3.00E-10 | KIF26B    | 1.32109  | 8.673672 | 3.81E-13 |
| LOC653814 | -1.32134 | -4.77719 | 7.92E-06 | PSMC3IP   | 1.322203 | 9.397545 | 1.44E-14 |
| GCNT3     | -1.32291 | -5.90731 | 8.06E-08 | PIP5KL1   | 1.322471 | 7.144166 | 3.72E-10 |
| HTR3A     | -1.32311 | -3.5756  | 0.000596 | DKFZp686E | 1.323518 | 6.637646 | 3.48E-09 |
| GRB14     | -1.32487 | -7.47303 | 8.58E-11 | OR10H1    | 1.326314 | 7.262406 | 2.20E-10 |
| SPATA6    | -1.32714 | -11.0225 | 1.00E-17 | NR2E1     | 1.326785 | 4.717181 | 9.97E-06 |
| BDH2      | -1.32934 | -9.5628  | 6.82E-15 | UCN2      | 1.330398 | 6.900379 | 1.10E-09 |
| COL21A1   | -1.33026 | -7.57867 | 5.34E-11 | LOC440686 | 1.332465 | 8.28107  | 2.25E-12 |
| MESP1     | -1.33077 | -6.56999 | 4.67E-09 | FLJ33860  | 1.332605 | 4.439864 | 2.85E-05 |
| C1orf178  | -1.33079 | -6.54948 | 5.11E-09 | AIM2      | 1.333618 | 8.504472 | 8.20E-13 |
| NOS1      | -1.33402 | -4.65483 | 1.27E-05 | ECOP      | 1.333926 | 8.221744 | 2.95E-12 |

|           |          |          |          |           |          |          |          |
|-----------|----------|----------|----------|-----------|----------|----------|----------|
| TRIM55    | -1.33475 | -4.40861 | 3.20E-05 | IL8       | 1.335617 | 5.46459  | 5.10E-07 |
| SBK1      | -1.33544 | -7.33547 | 1.59E-10 | RPL36A    | 1.336607 | 6.818048 | 1.58E-09 |
| LUZP2     | -1.33545 | -5.98848 | 5.72E-08 | MAGEA3    | 1.336717 | 5.889252 | 8.70E-08 |
| GLOXD1    | -1.33556 | -5.52866 | 3.92E-07 | ECE1      | 1.33696  | 8.055972 | 6.23E-12 |
| CLIC6     | -1.33634 | -7.34644 | 1.51E-10 | HIST1H3B  | 1.337449 | 5.894392 | 8.51E-08 |
| DGKB      | -1.33742 | -9.67186 | 4.17E-15 | SPATS1    | 1.338109 | 7.169462 | 3.33E-10 |
| PRLR      | -1.3375  | -6.7304  | 2.32E-09 | SLC12A4   | 1.338726 | 10.76319 | 3.16E-17 |
| C10orf68  | -1.33783 | -7.10905 | 4.35E-10 | FOXA2     | 1.339267 | 3.720971 | 0.000367 |
| SLC16A7   | -1.33854 | -7.76139 | 2.35E-11 | BNC1      | 1.340104 | 7.042344 | 5.85E-10 |
| ZNF418    | -1.34181 | -10.0712 | 6.92E-16 | IL11      | 1.340268 | 8.501041 | 8.33E-13 |
| HRC       | -1.34182 | -4.51903 | 2.12E-05 | CDC6      | 1.341408 | 8.986597 | 9.23E-14 |
| CMYA5     | -1.34248 | -7.31245 | 1.76E-10 | HCG4      | 1.342157 | 5.840132 | 1.07E-07 |
| NAP1L3    | -1.34342 | -5.76295 | 1.48E-07 | SDK2      | 1.342964 | 8.774358 | 2.41E-13 |
| C4orf7    | -1.34353 | -2.40974 | 0.018257 | KIAA0415  | 1.344642 | 9.132245 | 4.77E-14 |
| PLEKHB1   | -1.34413 | -6.26562 | 1.75E-08 | MAD1L1    | 1.344887 | 8.156919 | 3.95E-12 |
| TGFBR3    | -1.3455  | -11.8285 | 2.94E-19 | OAS3      | 1.346088 | 8.304192 | 2.03E-12 |
| FOXP2     | -1.34618 | -6.66641 | 3.07E-09 | FSTL3     | 1.348393 | 9.439362 | 1.19E-14 |
| CLDN20    | -1.34728 | -6.29359 | 1.55E-08 | MORC2     | 1.349094 | 9.495143 | 9.26E-15 |
| AGR3      | -1.34794 | -3.23898 | 0.001747 | CPXM      | 1.349658 | 10.22694 | 3.45E-16 |
| LRRC31    | -1.34908 | -3.98933 | 0.000146 | MARCKSL1  | 1.349827 | 9.144836 | 4.51E-14 |
| HHIP      | -1.34924 | -7.10672 | 4.40E-10 | GFI1      | 1.351306 | 8.395868 | 1.34E-12 |
| CCDC85A   | -1.34981 | -6.38222 | 1.06E-08 | CHRNA9    | 1.352584 | 4.102979 | 9.74E-05 |
| DYNLRB2   | -1.35179 | -9.64658 | 4.67E-15 | DPF1      | 1.354483 | 9.377278 | 1.58E-14 |
| KRT19     | -1.35286 | -2.84204 | 0.005684 | FLJ13909  | 1.356678 | 8.502005 | 8.29E-13 |
| CHL1      | -1.35322 | -7.55161 | 6.03E-11 | DCBLD1    | 1.359247 | 12.32487 | 3.47E-20 |
| AMHR2     | -1.35558 | -6.11288 | 3.36E-08 | PML       | 1.359705 | 11.95637 | 1.69E-19 |
| RERG      | -1.35612 | -7.23588 | 2.48E-10 | CHGB      | 1.361645 | 4.126191 | 8.96E-05 |
| NDST4     | -1.35822 | -7.05601 | 5.51E-10 | SPDY1     | 1.364217 | 9.027095 | 7.69E-14 |
| CLCA4     | -1.3584  | -5.61028 | 2.79E-07 | C2        | 1.365062 | 8.282289 | 2.24E-12 |
| CLYBL     | -1.35862 | -9.956   | 1.16E-15 | FLJ42986  | 1.366801 | 9.832589 | 2.02E-15 |
| TRIM63    | -1.36116 | -5.74014 | 1.63E-07 | KLK5      | 1.369612 | 5.799637 | 1.27E-07 |
| SLC35F1   | -1.36208 | -6.05548 | 4.30E-08 | FLT4      | 1.371551 | 8.874898 | 1.53E-13 |
| C21orf34  | -1.36356 | -9.07171 | 6.28E-14 | CSMD2     | 1.375018 | 7.656058 | 3.78E-11 |
| LOC388335 | -1.36389 | -7.11056 | 4.32E-10 | LOC653315 | 1.375572 | 7.097075 | 4.59E-10 |
| C12orf39  | -1.36519 | -7.14798 | 3.66E-10 | LOC645562 | 1.37807  | 6.517047 | 5.88E-09 |
| MOSC1     | -1.36535 | -6.76651 | 1.98E-09 | GPR82     | 1.37812  | 4.90074  | 4.89E-06 |
| NPR3      | -1.36724 | -5.99982 | 5.45E-08 | C10orf85  | 1.38092  | 5.80981  | 1.22E-07 |
| MYH14     | -1.37132 | -6.06534 | 4.12E-08 | GPR4      | 1.381255 | 4.278775 | 5.16E-05 |
| A2BP1     | -1.37148 | -5.01341 | 3.14E-06 | DDX58     | 1.381711 | 8.191195 | 3.38E-12 |
| WBSCR14   | -1.37333 | -8.55689 | 6.46E-13 | RAG1      | 1.38563  | 7.275674 | 2.07E-10 |
| NOVA1     | -1.3742  | -8.63423 | 4.55E-13 | NEK6      | 1.385951 | 6.914841 | 1.03E-09 |
| EFNB3     | -1.37498 | -6.18339 | 2.49E-08 | SLC43A2   | 1.386043 | 7.36891  | 1.37E-10 |
| HSPB2     | -1.37538 | -6.90004 | 1.10E-09 | CAD       | 1.386516 | 7.459214 | 9.13E-11 |
| SALL2     | -1.37623 | -6.41303 | 9.25E-09 | CAMK2N2   | 1.38857  | 7.286565 | 1.97E-10 |
| MYOM2     | -1.37698 | -6.52041 | 5.80E-09 | FLJ90166  | 1.392582 | 4.751403 | 8.74E-06 |
| EPHX2     | -1.3773  | -10.2268 | 3.45E-16 | C6orf105  | 1.393402 | 6.375697 | 1.09E-08 |
| ZC3H12B   | -1.38191 | -7.50632 | 7.39E-11 | CDCA8     | 1.393721 | 9.54802  | 7.29E-15 |

|           |          |          |          |           |          |          |          |
|-----------|----------|----------|----------|-----------|----------|----------|----------|
| GSTM3     | -1.38473 | -9.93812 | 1.26E-15 | TGM2      | 1.393736 | 8.290044 | 2.16E-12 |
| CPLX3     | -1.38596 | -4.1316  | 8.79E-05 | GJB7      | 1.394023 | 4.754122 | 8.65E-06 |
| ZNF287    | -1.38598 | -7.33301 | 1.61E-10 | KIFC1     | 1.394106 | 6.806725 | 1.66E-09 |
| DUSP13    | -1.38738 | -8.75875 | 2.59E-13 | IGLL1     | 1.394659 | 3.67609  | 0.000427 |
| TKTL1     | -1.3875  | -7.20072 | 2.89E-10 | KCNC3     | 1.394909 | 7.951462 | 9.99E-12 |
| SGCA      | -1.38881 | -4.55591 | 1.84E-05 | KREMEN2   | 1.395455 | 7.520325 | 6.94E-11 |
| ZNF546    | -1.38885 | -8.11439 | 4.79E-12 | BST2      | 1.398092 | 9.975926 | 1.06E-15 |
| ICA1      | -1.3915  | -10.3257 | 2.22E-16 | VEGFC     | 1.398094 | 10.13794 | 5.13E-16 |
| ZNF334    | -1.39238 | -6.89636 | 1.12E-09 | DOK3      | 1.399578 | 7.00802  | 6.81E-10 |
| HSPB6     | -1.39242 | -8.80281 | 2.12E-13 | LHB       | 1.400891 | 8.352312 | 1.63E-12 |
| LOC253012 | -1.39248 | -4.8892  | 5.12E-06 | RBP1      | 1.401042 | 10.26018 | 2.97E-16 |
| SERPINB11 | -1.39309 | -4.90518 | 4.81E-06 | SYT12     | 1.402148 | 8.980889 | 9.47E-14 |
| SLC24A5   | -1.39513 | -5.59805 | 2.94E-07 | TMEM89    | 1.403076 | 9.152211 | 4.36E-14 |
| CLCNKA    | -1.3956  | -5.27771 | 1.09E-06 | CLCF1     | 1.403526 | 7.586827 | 5.15E-11 |
| ALDH1L1   | -1.39599 | -5.69253 | 1.99E-07 | COL22A1   | 1.404646 | 6.48358  | 6.81E-09 |
| KCNB1     | -1.39603 | -6.67528 | 2.95E-09 | NMB       | 1.405213 | 6.675531 | 2.95E-09 |
| ATP6V1C2  | -1.39733 | -4.21386 | 6.54E-05 | DISP2     | 1.406288 | 6.793298 | 1.76E-09 |
| PLN       | -1.39781 | -8.70036 | 3.38E-13 | COL27A1   | 1.40793  | 9.142248 | 4.56E-14 |
| LOC387758 | -1.39781 | -6.08176 | 3.84E-08 | ADAM8     | 1.40827  | 5.894683 | 8.50E-08 |
| EEF1A2    | -1.39868 | -5.65691 | 2.30E-07 | DNMT3B    | 1.409502 | 12.40609 | 2.45E-20 |
| PCSK2     | -1.4011  | -12.0472 | 1.14E-19 | PDGFB     | 1.420587 | 11.98573 | 1.49E-19 |
| ZNF415    | -1.4017  | -8.61439 | 4.98E-13 | COL12A1   | 1.421196 | 10.84037 | 2.24E-17 |
| LTF       | -1.40744 | -3.26489 | 0.001612 | VWA1      | 1.422392 | 11.33215 | 2.56E-18 |
| CGREF1    | -1.40847 | -5.50317 | 4.35E-07 | ZNF695    | 1.422717 | 5.820835 | 1.16E-07 |
| TNNT3     | -1.40867 | -4.33334 | 4.23E-05 | PIK3CD    | 1.423165 | 9.820336 | 2.14E-15 |
| GULP1     | -1.41043 | -9.19169 | 3.65E-14 | NRIP3     | 1.424832 | 8.439349 | 1.10E-12 |
| PAK7      | -1.41125 | -10.9638 | 1.30E-17 | HSF1      | 1.425171 | 7.418839 | 1.09E-10 |
| TNN       | -1.41195 | -4.70803 | 1.03E-05 | SNX10     | 1.425243 | 8.81369  | 2.02E-13 |
| KCNA5     | -1.41343 | -5.2289  | 1.33E-06 | SLC10A6   | 1.426354 | 5.296607 | 1.01E-06 |
| HSPB7     | -1.41439 | -3.66531 | 0.000442 | IGFBP3    | 1.432209 | 5.590497 | 3.03E-07 |
| ANXA9     | -1.41501 | -4.44356 | 2.81E-05 | SLC2A6    | 1.433493 | 10.26868 | 2.86E-16 |
| ADRA2A    | -1.41578 | -5.9943  | 5.58E-08 | HIST1H2BC | 1.433705 | 8.746802 | 2.74E-13 |
| PDE4C     | -1.41596 | -6.39289 | 1.01E-08 | OSR2      | 1.43626  | 6.83702  | 1.45E-09 |
| ITLN1     | -1.41667 | -3.72612 | 0.000361 | ADAMTSL2  | 1.438648 | 8.513644 | 7.86E-13 |
| ROR1      | -1.41681 | -8.34296 | 1.70E-12 | CCL3      | 1.442592 | 5.660748 | 2.27E-07 |
| CABC1     | -1.41781 | -7.40881 | 1.14E-10 | LY6H      | 1.444125 | 9.164842 | 4.12E-14 |
| SLC7A10   | -1.41919 | -7.54005 | 6.36E-11 | CEECAM1   | 1.444621 | 8.800685 | 2.14E-13 |
| CD1E      | -1.4212  | -7.18593 | 3.09E-10 | EXTL3     | 1.445689 | 9.529924 | 7.91E-15 |
| FLJ22184  | -1.42244 | -8.69958 | 3.39E-13 | FBXL18    | 1.446283 | 7.03706  | 5.99E-10 |
| MLPH      | -1.42401 | -7.80915 | 1.90E-11 | PPAPDC1A  | 1.446369 | 8.26636  | 2.41E-12 |
| TGM3      | -1.42641 | -4.45146 | 2.73E-05 | ARL14     | 1.446947 | 6.916444 | 1.02E-09 |
| FLJ43505  | -1.42771 | -3.36075 | 0.001193 | FLJ41423  | 1.447704 | 8.096088 | 5.20E-12 |
| HBB       | -1.42777 | -4.96746 | 3.77E-06 | LETM2     | 1.448087 | 7.76714  | 2.29E-11 |
| GKAP1     | -1.42996 | -11.9583 | 1.68E-19 | LAMC2     | 1.448219 | 13.78178 | 7.66E-23 |
| C3orf15   | -1.43026 | -10.2004 | 3.88E-16 | CTHRC1    | 1.451361 | 7.79138  | 2.05E-11 |
| KATNAL2   | -1.43331 | -13.0166 | 1.84E-21 | TMEMPAI   | 1.454033 | 10.51584 | 9.48E-17 |
| FLJ42461  | -1.43813 | -5.4998  | 4.41E-07 | MGAT4B    | 1.454967 | 9.488581 | 9.54E-15 |

|          |          |          |          |           |          |          |          |
|----------|----------|----------|----------|-----------|----------|----------|----------|
| PTHR2    | -1.4386  | -2.83902 | 0.005733 | TUBB3     | 1.458165 | 9.97517  | 1.07E-15 |
| INMT     | -1.43902 | -8.23068 | 2.83E-12 | DLX1      | 1.461584 | 9.155436 | 4.30E-14 |
| CSN2     | -1.43927 | -6.30251 | 1.49E-08 | FAP       | 1.463978 | 7.862514 | 1.49E-11 |
| TM4SF11  | -1.44085 | -8.84179 | 1.78E-13 | ZNF707    | 1.466447 | 8.929732 | 1.19E-13 |
| MAML3    | -1.44086 | -9.08318 | 5.96E-14 | BIRC5     | 1.471194 | 8.842235 | 1.78E-13 |
| DKK2     | -1.4416  | -6.01301 | 5.15E-08 | DKK1      | 1.474817 | 4.900294 | 4.90E-06 |
| MMAB     | -1.44161 | -7.87771 | 1.39E-11 | PLAUR     | 1.478669 | 8.36631  | 1.53E-12 |
| ROPN1B   | -1.44259 | -5.17048 | 1.68E-06 | PCTK1     | 1.480224 | 7.05178  | 5.61E-10 |
| RSPO3    | -1.44643 | -7.23025 | 2.54E-10 | IL1RL1    | 1.480838 | 5.865129 | 9.63E-08 |
| C19orf18 | -1.44651 | -8.1145  | 4.78E-12 | SLCO6A1   | 1.483431 | 3.859547 | 0.000229 |
| HS3ST2   | -1.44714 | -4.84015 | 6.20E-06 | NRG1      | 1.4836   | 8.891842 | 1.42E-13 |
| GABRA2   | -1.44821 | -10.1741 | 4.37E-16 | EXT1      | 1.4838   | 8.825895 | 1.91E-13 |
| ARHGAP20 | -1.44885 | -8.06478 | 5.99E-12 | CSF3      | 1.48449  | 3.853906 | 0.000233 |
| GLS2     | -1.44961 | -9.39653 | 1.45E-14 | PPEF1     | 1.486912 | 6.422862 | 8.86E-09 |
| ZNF536   | -1.44966 | -8.4123  | 1.24E-12 | DNHD3     | 1.487356 | 4.788524 | 7.58E-06 |
| C13orf21 | -1.45007 | -8.56029 | 6.37E-13 | PSMB9     | 1.490112 | 7.348695 | 1.50E-10 |
| EPHB6    | -1.45159 | -7.13521 | 3.87E-10 | CDX1      | 1.493881 | 7.112296 | 4.29E-10 |
| PEBP4    | -1.45298 | -8.92751 | 1.21E-13 | SSH1      | 1.496419 | 8.65618  | 4.12E-13 |
| SPOCK3   | -1.45368 | -4.66154 | 1.23E-05 | SST       | 1.497201 | 5.19443  | 1.53E-06 |
| LRRK2    | -1.45848 | -11.6497 | 6.40E-19 | KRTAP4-10 | 1.49993  | 6.559417 | 4.89E-09 |
| KRT13    | -1.45867 | -6.2898  | 1.57E-08 | NALP10    | 1.500896 | 8.372468 | 1.49E-12 |
| FLJ25996 | -1.46183 | -6.74351 | 2.19E-09 | MEFV      | 1.502074 | 6.354178 | 1.19E-08 |
| PODN     | -1.46358 | -6.44204 | 8.15E-09 | PNKD      | 1.50763  | 10.95916 | 1.33E-17 |
| GALNT5   | -1.46459 | -5.65356 | 2.33E-07 | LAMA3     | 1.510865 | 12.62589 | 9.60E-21 |
| MGC3101  | -1.46472 | -6.59321 | 4.22E-09 | C7orf10   | 1.511506 | 12.3676  | 2.89E-20 |
| PRR4     | -1.46491 | -4.10296 | 9.74E-05 | PRR11     | 1.517687 | 10.16927 | 4.46E-16 |
| PPIL6    | -1.46611 | -9.80565 | 2.28E-15 | TFAP2E    | 1.523074 | 6.794084 | 1.75E-09 |
| EGF      | -1.46619 | -6.80807 | 1.65E-09 | FLJ20245  | 1.524785 | 8.427191 | 1.16E-12 |
| SCUBE2   | -1.46709 | -5.21043 | 1.43E-06 | ABL2      | 1.530585 | 9.369882 | 1.63E-14 |
| NLGN3    | -1.47246 | -9.28536 | 2.39E-14 | CNGB3     | 1.532205 | 5.604079 | 2.87E-07 |
| TMEM56   | -1.47283 | -6.46236 | 7.46E-09 | HSD17B6   | 1.532449 | 8.563056 | 6.29E-13 |
| FLJ20701 | -1.47355 | -9.04573 | 7.06E-14 | BCL9L     | 1.534783 | 9.598075 | 5.82E-15 |
| MFSD4    | -1.47471 | -4.96326 | 3.83E-06 | GALNT6    | 1.536134 | 8.087491 | 5.41E-12 |
| HPGD     | -1.47792 | -7.48961 | 7.97E-11 | SUNC1     | 1.536651 | 9.635396 | 4.92E-15 |
| PCDH19   | -1.47886 | -5.81318 | 1.20E-07 | INCA      | 1.537308 | 5.708025 | 1.86E-07 |
| CHAD     | -1.47998 | -5.6848  | 2.05E-07 | FKSG44    | 1.539769 | 7.660448 | 3.70E-11 |
| FAM71A   | -1.48155 | -7.04933 | 5.67E-10 | PTK7      | 1.542998 | 12.80092 | 4.57E-21 |
| DEPDC6   | -1.48181 | -10.4377 | 1.34E-16 | WNT2      | 1.543499 | 7.526968 | 6.74E-11 |
| SLC17A7  | -1.48306 | -12.6016 | 1.06E-20 | FLJ25084  | 1.545645 | 3.966131 | 0.000158 |
| C14orf39 | -1.4835  | -5.27328 | 1.11E-06 | DKFZp434E | 1.547535 | 7.272802 | 2.10E-10 |
| ZNF677   | -1.48596 | -11.1105 | 6.79E-18 | GDF15     | 1.54773  | 5.57563  | 3.23E-07 |
| HBA2     | -1.48711 | -7.22195 | 2.63E-10 | ISG15     | 1.548305 | 10.67136 | 4.75E-17 |
| CYP4X1   | -1.48767 | -8.76442 | 2.53E-13 | AURKB     | 1.549934 | 6.076345 | 3.93E-08 |
| CACNG1   | -1.49189 | -3.60856 | 0.000534 | CXCR7     | 1.549989 | 6.871523 | 1.24E-09 |
| ZNF285A  | -1.49254 | -7.05487 | 5.53E-10 | LOC644943 | 1.550086 | 5.664327 | 2.23E-07 |
| MYBPC2   | -1.49503 | -4.55112 | 1.88E-05 | TINAGL1   | 1.553607 | 8.154612 | 3.99E-12 |
| TXLNB    | -1.49728 | -6.79653 | 1.73E-09 | INDO      | 1.558043 | 6.440984 | 8.19E-09 |

|           |          |          |          |           |          |          |          |
|-----------|----------|----------|----------|-----------|----------|----------|----------|
| B3GALT1   | -1.49858 | -7.43035 | 1.04E-10 | COL4A2    | 1.559072 | 11.57258 | 8.96E-19 |
| ENPP3     | -1.49941 | -6.01876 | 5.03E-08 | PTRH1     | 1.559332 | 8.128291 | 4.50E-12 |
| SLC1A1    | -1.49952 | -7.47196 | 8.62E-11 | MMP3      | 1.560208 | 8.113886 | 4.80E-12 |
| CLCN4     | -1.49965 | -7.61996 | 4.44E-11 | PLSCR1    | 1.560379 | 11.87671 | 2.39E-19 |
| AMY2B     | -1.49977 | -11.006  | 1.08E-17 | SPANXA1   | 1.562662 | 4.624917 | 1.42E-05 |
| MPPED2    | -1.49996 | -5.55455 | 3.52E-07 | THY1      | 1.564535 | 8.248543 | 2.61E-12 |
| RNF150    | -1.50052 | -8.0389  | 6.73E-12 | LHX2      | 1.565009 | 5.403543 | 6.54E-07 |
| GAS2      | -1.50081 | -10.1667 | 4.51E-16 | RTP4      | 1.565796 | 7.830669 | 1.72E-11 |
| CGNL1     | -1.50101 | -11.4409 | 1.59E-18 | FAM101B   | 1.56595  | 8.478744 | 9.21E-13 |
| UGT8      | -1.50501 | -6.48859 | 6.66E-09 | KCNF1     | 1.570162 | 6.709446 | 2.54E-09 |
| SLC13A4   | -1.50602 | -5.34415 | 8.34E-07 | HIST1H3F  | 1.57062  | 9.472787 | 1.02E-14 |
| IL22      | -1.50695 | -4.3702  | 3.69E-05 | SLIC1     | 1.570713 | 7.103189 | 4.47E-10 |
| GUP1      | -1.50776 | -6.8824  | 1.19E-09 | EMILIN1   | 1.573144 | 8.697453 | 3.42E-13 |
| NTRK3     | -1.50832 | -9.76882 | 2.70E-15 | LOC352905 | 1.57378  | 5.975036 | 6.05E-08 |
| CART1     | -1.50916 | -3.14473 | 0.002333 | PYY2      | 1.577383 | 5.566775 | 3.35E-07 |
| ABHD9     | -1.51021 | -7.02288 | 6.38E-10 | PSG5      | 1.578386 | 4.993229 | 3.40E-06 |
| CCL23     | -1.51065 | -9.20909 | 3.37E-14 | PSKH1     | 1.580247 | 7.949621 | 1.01E-11 |
| BARX2     | -1.51095 | -7.09307 | 4.67E-10 | PATZ1     | 1.580346 | 7.775192 | 2.21E-11 |
| LOC285498 | -1.51329 | -7.97836 | 8.85E-12 | CASP5     | 1.584806 | 6.71663  | 2.46E-09 |
| SCN4A     | -1.51529 | -5.74717 | 1.58E-07 | PGF       | 1.589256 | 8.81242  | 2.03E-13 |
| ASB5      | -1.51819 | -4.20517 | 6.75E-05 | AJAP1     | 1.590393 | 6.883453 | 1.18E-09 |
| RNASE4    | -1.51865 | -12.1778 | 6.51E-20 | TCIRG1    | 1.593028 | 10.3773  | 1.76E-16 |
| NBEA      | -1.52048 | -8.39322 | 1.36E-12 | DSC1      | 1.593106 | 4.135742 | 8.66E-05 |
| TMSB4Y    | -1.52177 | -9.16188 | 4.18E-14 | HIST1H1B  | 1.594085 | 8.411726 | 1.25E-12 |
| PPM1L     | -1.52493 | -11.1076 | 6.88E-18 | APLN      | 1.595907 | 11.05262 | 8.77E-18 |
| CD1C      | -1.52651 | -8.87573 | 1.53E-13 | SERPINA9  | 1.597836 | 6.299703 | 1.51E-08 |
| OMD       | -1.52661 | -6.32294 | 1.37E-08 | TK1       | 1.598822 | 8.122808 | 4.61E-12 |
| IL17RB    | -1.52783 | -6.96451 | 8.26E-10 | FAM83A    | 1.599134 | 6.732073 | 2.30E-09 |
| LNX1      | -1.52837 | -7.57646 | 5.40E-11 | CXCL6     | 1.600476 | 4.982614 | 3.55E-06 |
| UNC13C    | -1.5313  | -5.26702 | 1.14E-06 | SMTN      | 1.602266 | 9.49153  | 9.41E-15 |
| C9orf111  | -1.53518 | -7.49182 | 7.89E-11 | FAM112B   | 1.602645 | 4.153614 | 8.12E-05 |
| SLC9A2    | -1.53651 | -7.24314 | 2.40E-10 | ISLR      | 1.605692 | 7.344377 | 1.53E-10 |
| SOSTDC1   | -1.53913 | -6.7849  | 1.82E-09 | C12orf36  | 1.605696 | 3.801042 | 0.00028  |
| PPP1R3C   | -1.53923 | -9.6399  | 4.82E-15 | UNQ689    | 1.610561 | 3.474729 | 0.000828 |
| COX7A1    | -1.54011 | -11.7047 | 5.04E-19 | CCR8      | 1.621399 | 7.51663  | 7.06E-11 |
| CLEC10A   | -1.54016 | -7.41883 | 1.09E-10 | CHST1     | 1.622344 | 7.628221 | 4.28E-11 |
| ANG       | -1.54439 | -10.4087 | 1.53E-16 | CGB5      | 1.623377 | 6.17792  | 2.55E-08 |
| NTRK2     | -1.54504 | -8.79252 | 2.22E-13 | RSAD2     | 1.627482 | 11.2118  | 4.35E-18 |
| UGT1A10   | -1.54944 | -5.67004 | 2.18E-07 | C19orf21  | 1.627672 | 8.238059 | 2.74E-12 |
| ABCC8     | -1.55222 | -8.86189 | 1.62E-13 | SLC24A2   | 1.628235 | 10.27169 | 2.82E-16 |
| RBM11     | -1.55341 | -8.89176 | 1.42E-13 | RCC1      | 1.629006 | 8.924558 | 1.22E-13 |
| DTNA      | -1.55486 | -7.18738 | 3.07E-10 | GUCY1A2   | 1.629434 | 9.517142 | 8.38E-15 |
| FRAS1     | -1.55547 | -7.77552 | 2.21E-11 | HOXC13    | 1.632004 | 6.818625 | 1.57E-09 |
| MT4       | -1.55824 | -3.95699 | 0.000163 | ARHGEF1   | 1.633215 | 9.243864 | 2.88E-14 |
| NTNG1     | -1.55897 | -7.28839 | 1.96E-10 | HOXD13    | 1.634154 | 5.434235 | 5.77E-07 |
| XPNPEP2   | -1.56123 | -10.614  | 6.12E-17 | C19orf10  | 1.634421 | 9.847301 | 1.89E-15 |
| GALNT12   | -1.56434 | -8.95853 | 1.05E-13 | CSAG2     | 1.636133 | 6.806314 | 1.66E-09 |

|           |          |          |          |           |          |          |          |
|-----------|----------|----------|----------|-----------|----------|----------|----------|
| CRABP1    | -1.56473 | -5.43894 | 5.66E-07 | TNIP3     | 1.63766  | 5.803435 | 1.25E-07 |
| KGFLP1    | -1.57263 | -8.09094 | 5.32E-12 | HIST1H2AB | 1.638623 | 8.064505 | 6.00E-12 |
| DACT2     | -1.5738  | -5.60184 | 2.89E-07 | RASA4     | 1.639808 | 5.534958 | 3.82E-07 |
| SYNGR1    | -1.57592 | -10.0058 | 9.29E-16 | PTGIR     | 1.64217  | 10.95178 | 1.37E-17 |
| SCGB3A1   | -1.57684 | -3.74014 | 0.000344 | HOXC6     | 1.644948 | 11.19298 | 4.73E-18 |
| ZMAT1     | -1.57699 | -9.50758 | 8.75E-15 | COL7A1    | 1.645576 | 8.186307 | 3.46E-12 |
| LOC150084 | -1.57809 | -6.0445  | 4.50E-08 | FOXD1     | 1.647304 | 6.850314 | 1.37E-09 |
| OSTN      | -1.57878 | -7.49918 | 7.63E-11 | COL1A1    | 1.649679 | 14.71142 | 1.77E-24 |
| ABCA6     | -1.58033 | -9.25767 | 2.71E-14 | HIST1H2AC | 1.650119 | 8.497213 | 8.47E-13 |
| SH3BGRL2  | -1.58418 | -11.9103 | 2.07E-19 | C10orf67  | 1.650272 | 8.243835 | 2.67E-12 |
| CYP2E1    | -1.58645 | -9.23806 | 2.96E-14 | CLSPN     | 1.651567 | 11.36261 | 2.24E-18 |
| RPL3L     | -1.58655 | -5.23769 | 1.28E-06 | FAM7A2    | 1.65676  | 10.08042 | 6.64E-16 |
| FLJ10847  | -1.58673 | -8.92967 | 1.19E-13 | UBD       | 1.656934 | 5.814414 | 1.19E-07 |
| PBX1      | -1.58722 | -11.1865 | 4.86E-18 | HOMER3    | 1.660956 | 10.23333 | 3.35E-16 |
| AFF3      | -1.58919 | -8.08655 | 5.43E-12 | SDS       | 1.663326 | 5.573302 | 3.26E-07 |
| OSTalpha  | -1.59057 | -7.04146 | 5.87E-10 | HIST1H3H  | 1.668772 | 9.686944 | 3.90E-15 |
| ZNF6      | -1.59674 | -8.89796 | 1.38E-13 | CYP27B1   | 1.66926  | 9.903643 | 1.47E-15 |
| CYorf14   | -1.60077 | -11.4322 | 1.65E-18 | NID1      | 1.670015 | 10.57791 | 7.19E-17 |
| TTC18     | -1.60229 | -8.99011 | 9.09E-14 | PCDH17    | 1.670065 | 9.859675 | 1.79E-15 |
| NCAM2     | -1.60237 | -6.15812 | 2.77E-08 | MGC45800  | 1.672794 | 8.523862 | 7.51E-13 |
| PTCHD1    | -1.60267 | -4.23939 | 5.96E-05 | DHRS2     | 1.674328 | 7.268141 | 2.14E-10 |
| TM4SF4    | -1.60297 | -6.45759 | 7.62E-09 | PRIC285   | 1.677747 | 10.86875 | 1.98E-17 |
| LOC161931 | -1.6039  | -7.76808 | 2.28E-11 | STRA6     | 1.678413 | 7.3509   | 1.48E-10 |
| LOC389432 | -1.60419 | -11.3599 | 2.27E-18 | SCG5      | 1.680578 | 10.17964 | 4.26E-16 |
| PTGFR     | -1.60433 | -12.0281 | 1.24E-19 | B3GAT3    | 1.6837   | 10.15792 | 4.69E-16 |
| ATP13A4   | -1.60474 | -5.79331 | 1.30E-07 | FN1       | 1.687563 | 10.5391  | 8.55E-17 |
| MSTP9     | -1.60474 | -9.61429 | 5.41E-15 | THSD1     | 1.68814  | 13.51407 | 2.31E-22 |
| IL1RAPL1  | -1.60787 | -7.10601 | 4.41E-10 | MAGEA12   | 1.690173 | 4.87687  | 5.37E-06 |
| PARK2     | -1.60833 | -12.5777 | 1.18E-20 | LIMK1     | 1.69731  | 11.94982 | 1.74E-19 |
| LOC389425 | -1.60951 | -2.94207 | 0.004262 | GNLY      | 1.69982  | 9.43186  | 1.23E-14 |
| USP6      | -1.61309 | -6.08676 | 3.76E-08 | TNFRSF9   | 1.701462 | 8.590888 | 5.54E-13 |
| ENPP4     | -1.61491 | -6.6332  | 3.55E-09 | COL11A1   | 1.703544 | 5.990576 | 5.66E-08 |
| ECHDC3    | -1.61518 | -5.3364  | 8.60E-07 | SERPINH1  | 1.706837 | 14.93313 | 7.34E-25 |
| C5orf4    | -1.61919 | -11.4409 | 1.59E-18 | HOXA13    | 1.709726 | 4.993565 | 3.40E-06 |
| CNTN3     | -1.62329 | -4.35617 | 3.89E-05 | COL6A2    | 1.710116 | 9.229524 | 3.07E-14 |
| FLJ46385  | -1.63347 | -7.08786 | 4.78E-10 | OR2L2     | 1.714423 | 6.974932 | 7.88E-10 |
| C8orf47   | -1.63747 | -8.16795 | 3.76E-12 | HAPLN3    | 1.719107 | 9.158284 | 4.24E-14 |
| ZNF229    | -1.64079 | -7.99844 | 8.08E-12 | LOC146905 | 1.721591 | 9.673069 | 4.15E-15 |
| NEB       | -1.64107 | -6.75998 | 2.03E-09 | C9orf84   | 1.728443 | 5.193361 | 1.53E-06 |
| CPEB1     | -1.6416  | -11.0577 | 8.58E-18 | ALOX12P2  | 1.729802 | 8.454644 | 1.03E-12 |
| LOC349236 | -1.64244 | -7.83562 | 1.68E-11 | EPHB2     | 1.732058 | 8.447023 | 1.06E-12 |
| FLJ42177  | -1.64369 | -8.86405 | 1.61E-13 | TMC7      | 1.732468 | 10.60905 | 6.26E-17 |
| MYH11     | -1.6443  | -7.64422 | 3.98E-11 | NEFL      | 1.734467 | 5.094479 | 2.28E-06 |
| BOC       | -1.645   | -9.41032 | 1.36E-14 | WDR66     | 1.739878 | 8.680589 | 3.69E-13 |
| INA       | -1.64668 | -5.88486 | 8.86E-08 | ITGAX     | 1.743925 | 9.886142 | 1.59E-15 |
| MFAP4     | -1.64708 | -8.04002 | 6.70E-12 | PRMT8     | 1.744054 | 5.594982 | 2.98E-07 |
| FLJ30046  | -1.6512  | -9.98869 | 1.00E-15 | LOC642782 | 1.755541 | 8.892897 | 1.41E-13 |



|           |          |          |          |           |          |          |          |
|-----------|----------|----------|----------|-----------|----------|----------|----------|
| CYP2C19   | -1.6523  | -5.52493 | 3.98E-07 | SLC28A3   | 1.756389 | 6.718957 | 2.44E-09 |
| GIPC2     | -1.65395 | -7.872   | 1.43E-11 | BAZ1B     | 1.757037 | 9.84569  | 1.91E-15 |
| KIF1A     | -1.65678 | -7.6068  | 4.71E-11 | NALP7     | 1.759775 | 8.639922 | 4.44E-13 |
| PLIN      | -1.65721 | -8.62952 | 4.65E-13 | PXDNL     | 1.761537 | 9.561623 | 6.86E-15 |
| TCEAL6    | -1.65798 | -8.08039 | 5.58E-12 | FLJ37970  | 1.768923 | 7.914228 | 1.18E-11 |
| FLJ36445  | -1.65807 | -8.36192 | 1.56E-12 | HOXD11    | 1.769286 | 9.469624 | 1.04E-14 |
| HPSE2     | -1.65942 | -8.15233 | 4.03E-12 | CDCA3     | 1.770304 | 10.91888 | 1.58E-17 |
| DCAMKL1   | -1.66457 | -9.38508 | 1.52E-14 | GBP5      | 1.777433 | 8.058102 | 6.17E-12 |
| CX3CR1    | -1.66553 | -7.83205 | 1.71E-11 | PLAC1     | 1.778358 | 10.26461 | 2.91E-16 |
| DMBT1     | -1.66721 | -2.61343 | 0.010704 | CXCL5     | 1.784637 | 4.501941 | 2.26E-05 |
| CLEC3B    | -1.67068 | -8.81754 | 1.99E-13 | CASP14    | 1.792363 | 4.498384 | 2.29E-05 |
| SPINK9    | -1.67182 | -3.23507 | 0.001768 | SCN8A     | 1.792434 | 6.627174 | 3.64E-09 |
| IGSF1     | -1.67185 | -9.25478 | 2.74E-14 | COL5A3    | 1.798209 | 10.12893 | 5.34E-16 |
| C1orf165  | -1.6746  | -7.63474 | 4.16E-11 | CD276     | 1.799174 | 13.92669 | 4.23E-23 |
| KARCA1    | -1.67682 | -7.96447 | 9.42E-12 | BET1L     | 1.807142 | 9.801161 | 2.33E-15 |
| DARC      | -1.67769 | -6.5862  | 4.35E-09 | HAPLN1    | 1.808617 | 8.136699 | 4.33E-12 |
| C6orf117  | -1.68217 | -6.77509 | 1.90E-09 | LOC654125 | 1.81004  | 8.6258   | 4.73E-13 |
| TMPRSS11  | -1.68224 | -5.87588 | 9.20E-08 | TCHHL1    | 1.813329 | 3.361433 | 0.00119  |
| NEGR1     | -1.6862  | -7.91759 | 1.16E-11 | MGC29506  | 1.814467 | 4.441644 | 2.83E-05 |
| CAND2     | -1.68646 | -9.54936 | 7.25E-15 | FADS3     | 1.814633 | 11.45241 | 1.51E-18 |
| COCH      | -1.68648 | -6.43385 | 8.45E-09 | FOXO1     | 1.815021 | 9.429802 | 1.24E-14 |
| RRAGD     | -1.68927 | -12.6007 | 1.07E-20 | ST8SIA2   | 1.817135 | 8.669382 | 3.88E-13 |
| CYP4Z1    | -1.69028 | -7.62471 | 4.35E-11 | IGFL3     | 1.830141 | 4.603847 | 1.54E-05 |
| CYP3A4    | -1.69156 | -7.04753 | 5.72E-10 | ATAD3B    | 1.832532 | 9.994427 | 9.77E-16 |
| LY6G6D    | -1.69576 | -8.23403 | 2.79E-12 | RGS20     | 1.833197 | 8.154031 | 4.00E-12 |
| FLJ14054  | -1.69579 | -6.93321 | 9.48E-10 | HSF2BP    | 1.836269 | 9.125759 | 4.92E-14 |
| MYPN      | -1.69834 | -4.93499 | 4.28E-06 | IFIT3     | 1.836865 | 10.38238 | 1.72E-16 |
| ABCA3     | -1.70049 | -9.77646 | 2.60E-15 | PLA2G7    | 1.842345 | 9.482424 | 9.80E-15 |
| C20orf166 | -1.70289 | -5.885   | 8.86E-08 | CD80      | 1.844473 | 8.546325 | 6.78E-13 |
| ST6GALNA1 | -1.70401 | -6.03878 | 4.62E-08 | FEZ1      | 1.844615 | 12.79454 | 4.70E-21 |
| WIF1      | -1.70978 | -8.53936 | 7.00E-13 | FLJ46010  | 1.848935 | 7.580556 | 5.30E-11 |
| CAMK2B    | -1.70985 | -5.89521 | 8.48E-08 | CTSL      | 1.850482 | 9.41297  | 1.34E-14 |
| PDK4      | -1.71068 | -8.2371  | 2.75E-12 | SPOCD1    | 1.853653 | 10.99573 | 1.13E-17 |
| ZNF471    | -1.71098 | -10.9269 | 1.53E-17 | FOLR3     | 1.854595 | 7.650198 | 3.88E-11 |
| PLEKHG6   | -1.71317 | -6.803   | 1.68E-09 | IER5L     | 1.8562   | 13.52282 | 2.23E-22 |
| P11       | -1.71327 | -6.79259 | 1.76E-09 | GALNTL4   | 1.869784 | 9.955559 | 1.16E-15 |
| GPR64     | -1.71353 | -5.73256 | 1.68E-07 | HMGA2     | 1.871292 | 13.36302 | 4.33E-22 |
| KCNT1     | -1.71473 | -5.05659 | 2.65E-06 | TREM2     | 1.872049 | 13.24069 | 7.20E-22 |
| ZNF540    | -1.71486 | -11.0762 | 7.90E-18 | ADAMTS6   | 1.87434  | 14.20799 | 1.34E-23 |
| L3MBTL4   | -1.71884 | -9.37161 | 1.62E-14 | SERINC2   | 1.874466 | 8.170063 | 3.72E-12 |
| BMP5      | -1.71961 | -8.47615 | 9.32E-13 | HIST1H2AM | 1.899381 | 9.608505 | 5.55E-15 |
| CRHBP     | -1.72015 | -10.351  | 1.98E-16 | SALL4     | 1.900803 | 7.807324 | 1.91E-11 |
| FLJ11017  | -1.7215  | -5.12332 | 2.03E-06 | ANGPT2    | 1.900976 | 14.36155 | 7.22E-24 |
| SUSD4     | -1.72365 | -7.33625 | 1.58E-10 | LST-3TM12 | 1.905308 | 5.509563 | 4.24E-07 |
| B3GALT5   | -1.72396 | -7.07349 | 5.09E-10 | PLCZ1     | 1.918253 | 11.21178 | 4.35E-18 |
| NPY6R     | -1.72396 | -7.35913 | 1.43E-10 | HOXC4     | 1.9219   | 10.89644 | 1.75E-17 |
| AMY1B     | -1.7267  | -10.1836 | 4.18E-16 | SPHK1     | 1.933954 | 9.700363 | 3.67E-15 |

|           |          |          |          |           |          |          |          |
|-----------|----------|----------|----------|-----------|----------|----------|----------|
| RND2      | -1.73067 | -8.78879 | 2.26E-13 | EDG7      | 1.939597 | 10.00591 | 9.28E-16 |
| UGT1A6    | -1.73174 | -5.5822  | 3.14E-07 | WNT7B     | 1.946154 | 5.368205 | 7.56E-07 |
| PKHD1L1   | -1.73209 | -8.94212 | 1.13E-13 | ZBTB32    | 1.949345 | 8.477411 | 9.27E-13 |
| MGC13057  | -1.73335 | -9.4381  | 1.20E-14 | CCL7      | 1.976283 | 8.419795 | 1.20E-12 |
| CYP2C9    | -1.73531 | -6.30505 | 1.47E-08 | LOC440157 | 1.982413 | 8.733211 | 2.91E-13 |
| GLT25D2   | -1.74103 | -9.32595 | 1.99E-14 | HOXC9     | 1.983151 | 12.49914 | 1.65E-20 |
| GUCY2C    | -1.74299 | -6.08234 | 3.83E-08 | CDSN      | 1.986342 | 4.856391 | 5.82E-06 |
| PIK3C2G   | -1.74553 | -5.71838 | 1.78E-07 | INHBA     | 1.98707  | 11.55406 | 9.71E-19 |
| NAALAD2   | -1.74621 | -12.4986 | 1.65E-20 | SOCS1     | 1.991657 | 9.743801 | 3.02E-15 |
| SCGB1A1   | -1.7469  | -3.7312  | 0.000355 | ADAM12    | 1.991758 | 14.37601 | 6.81E-24 |
| KCNAB1    | -1.75079 | -11.2469 | 3.73E-18 | SPRY4     | 1.995873 | 16.08371 | 8.35E-27 |
| ZNF135    | -1.75363 | -9.35985 | 1.71E-14 | GPR172B   | 2.004103 | 7.940007 | 1.05E-11 |
| TMEM178   | -1.75642 | -8.39012 | 1.38E-12 | DLL3      | 2.00511  | 6.861922 | 1.30E-09 |
| SRD5A2L2  | -1.7584  | -6.28312 | 1.62E-08 | KIAA1609  | 2.010915 | 10.5287  | 8.95E-17 |
| FABP3     | -1.7679  | -7.86235 | 1.49E-11 | LOC399947 | 2.023115 | 6.157208 | 2.78E-08 |
| FOXA1     | -1.76791 | -6.04365 | 4.52E-08 | LOC200810 | 2.032961 | 10.29505 | 2.54E-16 |
| BEX1      | -1.76839 | -6.9725  | 7.97E-10 | ADAMTS4   | 2.036896 | 6.606353 | 3.99E-09 |
| C10orf65  | -1.76856 | -11.5315 | 1.07E-18 | ODZ2      | 2.040504 | 8.775447 | 2.40E-13 |
| ATP6VOA4  | -1.76929 | -7.46522 | 8.89E-11 | CGB1      | 2.043909 | 6.882323 | 1.19E-09 |
| LOC441178 | -1.77023 | -5.26861 | 1.13E-06 | PLAU      | 2.046534 | 11.43852 | 1.61E-18 |
| FSTL5     | -1.77105 | -6.90118 | 1.09E-09 | MAPKBP1   | 2.04691  | 9.452507 | 1.12E-14 |
| FHIT      | -1.77183 | -13.1725 | 9.58E-22 | CDH3      | 2.051389 | 9.062477 | 6.55E-14 |
| SLC16A14  | -1.77393 | -9.96637 | 1.11E-15 | HIST1H4I  | 2.05675  | 10.95908 | 1.33E-17 |
| LRRC2     | -1.77433 | -8.34162 | 1.71E-12 | LOC653133 | 2.06441  | 12.21424 | 5.57E-20 |
| FLJ35220  | -1.7786  | -10.6144 | 6.11E-17 | OFCC1     | 2.068073 | 11.61206 | 7.54E-19 |
| RSPO1     | -1.77989 | -9.98351 | 1.03E-15 | CLSTN3    | 2.070427 | 9.007453 | 8.40E-14 |
| AOX1      | -1.78034 | -7.70515 | 3.03E-11 | SLC44A5   | 2.074387 | 7.04793  | 5.71E-10 |
| FGF14     | -1.78228 | -11.7363 | 4.39E-19 | SPRR4     | 2.074834 | 5.062431 | 2.59E-06 |
| FLJ46831  | -1.78419 | -11.2757 | 3.29E-18 | GNGT1     | 2.079242 | 9.9957   | 9.72E-16 |
| SCNN1B    | -1.78538 | -6.60361 | 4.03E-09 | CREG2     | 2.082815 | 7.161359 | 3.45E-10 |
| GAMT      | -1.78588 | -11.3597 | 2.27E-18 | FBLIM1    | 2.09343  | 14.41119 | 5.91E-24 |
| THBS4     | -1.78693 | -5.80225 | 1.25E-07 | ZPLD1     | 2.106005 | 7.991289 | 8.35E-12 |
| ABI3BP    | -1.78738 | -10.8972 | 1.74E-17 | LY6K      | 2.117782 | 11.68808 | 5.42E-19 |
| SELENBP1  | -1.79019 | -14.0576 | 2.48E-23 | UHRF1     | 2.12135  | 12.05303 | 1.11E-19 |
| ACTN2     | -1.79059 | -7.0863  | 4.81E-10 | NXPH4     | 2.122599 | 8.723911 | 3.03E-13 |
| CD207     | -1.79479 | -5.18727 | 1.57E-06 | ITGA3     | 2.125983 | 15.5093  | 7.64E-26 |
| OR13A1    | -1.79482 | -9.34983 | 1.78E-14 | CDKN2A    | 2.131135 | 6.798752 | 1.72E-09 |
| BEX2      | -1.796   | -8.37611 | 1.47E-12 | ADAMDEC1  | 2.13422  | 6.138763 | 3.01E-08 |
| NKX2-3    | -1.79795 | -7.74679 | 2.51E-11 | STX1A     | 2.135044 | 13.6889  | 1.12E-22 |
| GFRA1     | -1.80713 | -10.1357 | 5.18E-16 | IL12RB2   | 2.136617 | 9.317302 | 2.07E-14 |
| CASC1     | -1.81085 | -9.27255 | 2.53E-14 | COL4A6    | 2.143827 | 14.34238 | 7.80E-24 |
| KLB       | -1.81196 | -12.3347 | 3.32E-20 | MAGEA4    | 2.148953 | 4.387789 | 3.46E-05 |
| MYOZ1     | -1.8121  | -7.90604 | 1.23E-11 | TNFRSF12A | 2.155089 | 10.80636 | 2.61E-17 |
| CORIN     | -1.8137  | -5.82758 | 1.13E-07 | PLA2G2F   | 2.156758 | 7.388711 | 1.25E-10 |
| SLC7A2    | -1.81417 | -10.644  | 5.36E-17 | BATF2     | 2.167859 | 9.878332 | 1.65E-15 |
| DES       | -1.81457 | -4.41612 | 3.11E-05 | CSAG1     | 2.1681   | 5.690426 | 2.00E-07 |
| EPHA6     | -1.82202 | -9.86235 | 1.77E-15 | ATP6VOD2  | 2.187776 | 6.71415  | 2.49E-09 |

|           |          |          |          |           |          |          |          |
|-----------|----------|----------|----------|-----------|----------|----------|----------|
| C10orf92  | -1.8279  | -7.29203 | 1.93E-10 | HOXA10    | 2.192584 | 12.72667 | 6.26E-21 |
| SFTPG     | -1.82825 | -6.30137 | 1.50E-08 | PKMYT1    | 2.209886 | 12.23738 | 5.04E-20 |
| PLP1      | -1.82921 | -12.0841 | 9.75E-20 | WISP1     | 2.249282 | 14.65536 | 2.22E-24 |
| CLIC5     | -1.82952 | -7.94399 | 1.03E-11 | FLJ13391  | 2.268778 | 9.447437 | 1.15E-14 |
| PLAC9     | -1.83276 | -10.3399 | 2.08E-16 | CXCL9     | 2.276592 | 7.275519 | 2.07E-10 |
| KIAA1912  | -1.83364 | -9.03368 | 7.46E-14 | TMEM92    | 2.284269 | 8.296335 | 2.10E-12 |
| ARSF      | -1.83395 | -7.85051 | 1.57E-11 | MGC17624  | 2.296836 | 13.50178 | 2.43E-22 |
| SSTR1     | -1.83765 | -10.4167 | 1.48E-16 | MSC       | 2.299363 | 9.735931 | 3.13E-15 |
| DUSP26    | -1.84161 | -7.75254 | 2.45E-11 | GRP       | 2.303013 | 6.485149 | 6.76E-09 |
| SPATA18   | -1.84684 | -8.58448 | 5.71E-13 | GLIS2     | 2.322219 | 8.94663  | 1.11E-13 |
| DKFZP564J | -1.84733 | -11.7242 | 4.63E-19 | ARTN      | 2.348851 | 16.53856 | 1.49E-27 |
| DDIT4L    | -1.85277 | -5.86543 | 9.62E-08 | IGFL2     | 2.348874 | 6.435212 | 8.40E-09 |
| SLC6A1    | -1.85555 | -7.07321 | 5.10E-10 | GSG2      | 2.355391 | 13.52369 | 2.22E-22 |
| DEGS2     | -1.86184 | -6.01847 | 5.03E-08 | C10orf63  | 2.362804 | 8.297349 | 2.09E-12 |
| SCGB2A2   | -1.86398 | -3.81799 | 0.000264 | CXCL11    | 2.369473 | 6.505738 | 6.18E-09 |
| SMR3B     | -1.86796 | -3.93774 | 0.000174 | S100A7L1  | 2.370064 | 5.05339  | 2.68E-06 |
| ZFP2      | -1.8711  | -11.4464 | 1.55E-18 | ESM1      | 2.394912 | 8.616383 | 4.94E-13 |
| LPO       | -1.87322 | -3.97273 | 0.000154 | HOXB7     | 2.41044  | 6.641114 | 3.42E-09 |
| FLJ25791  | -1.87329 | -7.97207 | 9.10E-12 | KIAA1893  | 2.413481 | 12.96205 | 2.32E-21 |
| GLYATL2   | -1.88113 | -4.65837 | 1.25E-05 | MMP7      | 2.419167 | 4.418008 | 3.09E-05 |
| ALDH1A1   | -1.88159 | -11.0669 | 8.24E-18 | RPIP8     | 2.427794 | 10.65994 | 4.99E-17 |
| TLE2      | -1.88638 | -12.9406 | 2.54E-21 | LAMA1     | 2.434426 | 8.970021 | 9.95E-14 |
| MMP27     | -1.88774 | -8.66133 | 4.03E-13 | LOC643425 | 2.451386 | 7.857864 | 1.52E-11 |
| ZBTB16    | -1.89044 | -6.43104 | 8.55E-09 | TNFRSF6B  | 2.458355 | 10.79781 | 2.71E-17 |
| KRTAP13-1 | -1.89664 | -4.2754  | 5.23E-05 | CCL11     | 2.461515 | 10.66744 | 4.83E-17 |
| TIMP4     | -1.89692 | -9.9169  | 1.38E-15 | SPP1      | 2.472496 | 7.125126 | 4.05E-10 |
| FAM130A2  | -1.89736 | -9.67648 | 4.09E-15 | MFAP2     | 2.496301 | 13.6651  | 1.24E-22 |
| LOC138046 | -1.89792 | -5.1916  | 1.54E-06 | LHX1      | 2.4968   | 13.79504 | 7.25E-23 |
| ALOX12    | -1.89856 | -5.69808 | 1.94E-07 | SATL1     | 2.507408 | 7.296998 | 1.88E-10 |
| ENO3      | -1.8993  | -8.12477 | 4.57E-12 | C1QTNF6   | 2.533069 | 21.81764 | 1.89E-35 |
| WISP2     | -1.90483 | -5.99827 | 5.48E-08 | TM4SF19   | 2.543664 | 12.35529 | 3.04E-20 |
| PLEKHA6   | -1.90526 | -11.8321 | 2.90E-19 | ZNF114    | 2.550314 | 14.42901 | 5.50E-24 |
| RGS22     | -1.90609 | -8.69036 | 3.53E-13 | ELAVL2    | 2.553923 | 10.93823 | 1.45E-17 |
| TRPM1     | -1.90805 | -6.02393 | 4.92E-08 | AGRN      | 2.568845 | 11.17199 | 5.18E-18 |
| MAOB      | -1.90908 | -13.7929 | 7.32E-23 | RTP3      | 2.583347 | 8.172896 | 3.67E-12 |
| SCARA5    | -1.90917 | -8.60635 | 5.17E-13 | CALB1     | 2.605234 | 8.411672 | 1.25E-12 |
| LOC643394 | -1.91052 | -3.23924 | 0.001746 | PTHLH     | 2.606797 | 12.90335 | 2.97E-21 |
| MGST1     | -1.91713 | -6.51204 | 6.01E-09 | OASL      | 2.629184 | 11.69776 | 5.19E-19 |
| TMEM52    | -1.91715 | -8.59212 | 5.51E-13 | KIAA1622  | 2.638863 | 11.12863 | 6.27E-18 |
| PPP1R1B   | -1.91752 | -5.9324  | 7.25E-08 | C10orf132 | 2.640181 | 10.03507 | 8.14E-16 |
| CYP3A5    | -1.91981 | -7.26996 | 2.13E-10 | HOXA5     | 2.658109 | 8.853132 | 1.69E-13 |
| LMOD3     | -1.92113 | -6.0068  | 5.29E-08 | HOXD10    | 2.658512 | 11.01019 | 1.06E-17 |
| LDOC1     | -1.92452 | -8.24185 | 2.69E-12 | LOC129607 | 2.668066 | 13.07105 | 1.47E-21 |
| LOC284434 | -1.92461 | -4.83868 | 6.24E-06 | CSMD3     | 2.678694 | 10.89114 | 1.79E-17 |
| KSP37     | -1.92512 | -6.61067 | 3.91E-09 | SBEM      | 2.71862  | 6.99916  | 7.08E-10 |
| CNTD      | -1.92668 | -6.28293 | 1.62E-08 | HOXA11    | 2.730205 | 10.56471 | 7.63E-17 |
| ABCA8     | -1.92684 | -10.4993 | 1.02E-16 | PROC      | 2.734585 | 9.818276 | 2.16E-15 |

|           |          |          |          |          |          |          |          |
|-----------|----------|----------|----------|----------|----------|----------|----------|
| CAPZA3    | -1.93086 | -6.51684 | 5.89E-09 | WNT7A    | 2.744039 | 13.43135 | 3.26E-22 |
| PAX9      | -1.93168 | -8.81252 | 2.03E-13 | TAGLN3   | 2.747362 | 8.979277 | 9.54E-14 |
| STAB2     | -1.94549 | -7.67251 | 3.51E-11 | MMP12    | 2.765054 | 10.10701 | 5.90E-16 |
| SFRP1     | -1.94748 | -5.98517 | 5.80E-08 | CST1     | 2.76654  | 7.087844 | 4.78E-10 |
| C18orf34  | -1.94869 | -8.16569 | 3.80E-12 | TNFRSF18 | 2.786517 | 12.34359 | 3.20E-20 |
| DBC1      | -1.94871 | -6.03687 | 4.65E-08 | TH       | 2.793774 | 11.03614 | 9.43E-18 |
| ANK2      | -1.94878 | -10.2274 | 3.44E-16 | CCNA1    | 2.821397 | 8.849674 | 1.72E-13 |
| ANKS1B    | -1.94954 | -13.2401 | 7.22E-22 | TDO2     | 2.855374 | 12.17952 | 6.47E-20 |
| PCK1      | -1.95025 | -8.83055 | 1.87E-13 | SERPINE1 | 2.883038 | 11.78972 | 3.48E-19 |
| ANGPTL1   | -1.95062 | -10.0242 | 8.55E-16 | ADAMTS2  | 2.883631 | 14.78179 | 1.34E-24 |
| ATP13A5   | -1.95407 | -6.10059 | 3.55E-08 | IFI6     | 2.921803 | 16.68323 | 8.66E-28 |
| MGC72075  | -1.95633 | -10.6999 | 4.18E-17 | COL10A1  | 2.945713 | 9.067521 | 6.40E-14 |
| CAPN9     | -1.95732 | -4.19203 | 7.07E-05 | ZIC2     | 2.958402 | 9.615426 | 5.38E-15 |
| CTTNBP2   | -1.95791 | -11.4073 | 1.84E-18 | MMP9     | 3.060322 | 11.94396 | 1.79E-19 |
| CA3       | -1.96305 | -8.02729 | 7.09E-12 | CSF2     | 3.061011 | 9.215493 | 3.28E-14 |
| LOC285016 | -1.96468 | -9.83528 | 2.00E-15 | CXCL13   | 3.10144  | 9.971269 | 1.08E-15 |
| FLJ22671  | -1.96527 | -7.44206 | 9.86E-11 | MMP1     | 3.247745 | 16.07648 | 8.58E-27 |
| ESRRG     | -1.96581 | -8.12167 | 4.63E-12 | DNAH17   | 3.252448 | 11.69509 | 5.25E-19 |
| LOC161247 | -1.96634 | -7.68687 | 3.29E-11 | MMP10    | 3.359732 | 13.17634 | 9.43E-22 |
| TMOD1     | -1.96737 | -7.38644 | 1.26E-10 | CSAG3A   | 3.36166  | 9.212227 | 3.33E-14 |
| TMEM16E   | -1.96933 | -7.16059 | 3.46E-10 | SOX11    | 3.36341  | 14.06227 | 2.43E-23 |
| APOD      | -1.96994 | -8.94932 | 1.09E-13 | K6HF     | 3.364014 | 8.20235  | 3.22E-12 |
| BCMO1     | -1.97109 | -7.52568 | 6.78E-11 | PAEP     | 3.419997 | 11.64771 | 6.46E-19 |
| ELF5      | -1.97436 | -5.99885 | 5.47E-08 | FLJ25801 | 3.58835  | 11.18995 | 4.79E-18 |
| LOC89944  | -1.97894 | -8.83346 | 1.85E-13 | HOXC8    | 3.653167 | 12.17138 | 6.70E-20 |
| KRTAP11-1 | -1.9791  | -4.69745 | 1.08E-05 | SLCO1B3  | 3.665511 | 8.249653 | 2.60E-12 |
| TMEM100   | -1.98092 | -12.0591 | 1.09E-19 | MMP11    | 4.298541 | 16.96997 | 2.98E-28 |
| NSUN7     | -1.98834 | -11.1723 | 5.18E-18 | IL24     | 4.560307 | 12.77096 | 5.19E-21 |
| CA8       | -1.99241 | -8.62663 | 4.71E-13 | CA9      | 4.844677 | 15.40268 | 1.16E-25 |
| PART1     | -1.99378 | -6.55569 | 4.97E-09 | MMP13    | 5.335988 | 15.34258 | 1.46E-25 |
| MLCK      | -1.99384 | -6.70319 | 2.61E-09 |          |          |          |          |
| GRIN3A    | -1.995   | -8.67768 | 3.74E-13 |          |          |          |          |
| KRTHB4    | -1.99903 | -3.9793  | 0.000151 |          |          |          |          |
| MDH1B     | -1.99951 | -12.3111 | 3.68E-20 |          |          |          |          |
| STXBP6    | -1.9997  | -11.112  | 6.75E-18 |          |          |          |          |
| MYL6P     | -2.00502 | -5.59222 | 3.01E-07 |          |          |          |          |
| PGM5      | -2.00543 | -9.18538 | 3.75E-14 |          |          |          |          |
| KRTAP3-2  | -2.00836 | -6.2291  | 2.04E-08 |          |          |          |          |
| TMEM74    | -2.01816 | -9.71549 | 3.43E-15 |          |          |          |          |
| PPARGC1A  | -2.02255 | -9.66601 | 4.28E-15 |          |          |          |          |
| CSN3      | -2.02682 | -4.18021 | 7.38E-05 |          |          |          |          |
| ZFP28     | -2.02905 | -11.9977 | 1.42E-19 |          |          |          |          |
| PPARG     | -2.04006 | -12.8029 | 4.53E-21 |          |          |          |          |
| PROM1     | -2.04371 | -4.84085 | 6.18E-06 |          |          |          |          |
| COMP      | -2.04657 | -6.0455  | 4.49E-08 |          |          |          |          |
| LRFN5     | -2.0467  | -8.08115 | 5.56E-12 |          |          |          |          |
| TNNI2     | -2.04991 | -6.40169 | 9.71E-09 |          |          |          |          |

|           |          |          |          |
|-----------|----------|----------|----------|
| LOC388135 | -2.05447 | -9.33792 | 1.88E-14 |
| ACSM3     | -2.06192 | -15.2932 | 1.78E-25 |
| CALML6    | -2.06329 | -9.39296 | 1.47E-14 |
| CES1      | -2.06529 | -6.98325 | 7.60E-10 |
| SLITRK3   | -2.07311 | -7.86869 | 1.45E-11 |
| KRTHA6    | -2.0741  | -4.67097 | 1.19E-05 |
| APOBEC2   | -2.07669 | -6.45757 | 7.62E-09 |
| AGTR1     | -2.07832 | -6.95405 | 8.65E-10 |
| TLX1      | -2.07896 | -5.73879 | 1.64E-07 |
| SMPX      | -2.07911 | -5.97953 | 5.94E-08 |
| NME5      | -2.0802  | -7.29133 | 1.93E-10 |
| IL1F6     | -2.08052 | -4.80013 | 7.24E-06 |
| MGC39715  | -2.08139 | -7.57898 | 5.34E-11 |
| ASB10     | -2.08323 | -6.92791 | 9.71E-10 |
| C9orf61   | -2.09362 | -10.9444 | 1.41E-17 |
| OXGR1     | -2.09523 | -9.27334 | 2.52E-14 |
| FLJ45803  | -2.09584 | -8.70601 | 3.29E-13 |
| OTC       | -2.09605 | -9.67083 | 4.19E-15 |
| PROL1     | -2.09736 | -4.29137 | 4.93E-05 |
| RPS6KA6   | -2.10847 | -12.1683 | 6.79E-20 |
| HRASLS    | -2.10856 | -8.45579 | 1.02E-12 |
| LMX1A     | -2.11074 | -13.0039 | 1.94E-21 |
| ADAMTS19  | -2.11094 | -10.8545 | 2.11E-17 |
| EYA1      | -2.11124 | -8.79013 | 2.25E-13 |
| ALDH1A2   | -2.11459 | -9.04607 | 7.05E-14 |
| C6orf60   | -2.11478 | -12.4899 | 1.71E-20 |
| FUT6      | -2.11808 | -9.37878 | 1.57E-14 |
| RORB      | -2.11958 | -12.6131 | 1.01E-20 |
| PRELP     | -2.12479 | -11.4961 | 1.25E-18 |
| CACNB4    | -2.12655 | -17.2168 | 1.20E-28 |
| ART3      | -2.12657 | -6.81088 | 1.63E-09 |
| GPT       | -2.12857 | -10.1514 | 4.83E-16 |
| SLC25A21  | -2.13039 | -10.1476 | 4.92E-16 |
| TYR       | -2.13066 | -6.03275 | 4.74E-08 |
| FAM107A   | -2.13886 | -10.2683 | 2.86E-16 |
| TJP3      | -2.13929 | -7.34059 | 1.55E-10 |
| MYL1      | -2.14266 | -5.40704 | 6.45E-07 |
| KCNT2     | -2.14286 | -12.2123 | 5.62E-20 |
| CES4      | -2.14377 | -6.32289 | 1.37E-08 |
| SLC5A7    | -2.14657 | -9.07861 | 6.09E-14 |
| SLN       | -2.15073 | -6.37124 | 1.11E-08 |
| S100A1    | -2.16048 | -6.55007 | 5.10E-09 |
| CEACAM7   | -2.16552 | -5.04851 | 2.73E-06 |
| ABO       | -2.16852 | -8.68493 | 3.62E-13 |
| MYH6      | -2.17801 | -5.64872 | 2.38E-07 |
| FMO2      | -2.1793  | -8.19455 | 3.33E-12 |
| MYBPC1    | -2.17983 | -6.328   | 1.34E-08 |

|           |          |          |          |
|-----------|----------|----------|----------|
| DPT       | -2.18368 | -8.85107 | 1.71E-13 |
| LRRC7     | -2.18806 | -9.18017 | 3.84E-14 |
| C20orf114 | -2.18873 | -3.73236 | 0.000353 |
| LRRC4C    | -2.18916 | -11.2066 | 4.45E-18 |
| ASPA      | -2.19204 | -10.095  | 6.22E-16 |
| ELA2      | -2.19335 | -8.96868 | 1.00E-13 |
| SLC4A4    | -2.19436 | -10.0607 | 7.26E-16 |
| C6orf142  | -2.19723 | -8.34551 | 1.68E-12 |
| TNNC1     | -2.19875 | -5.9663  | 6.28E-08 |
| DPCR1     | -2.20016 | -7.80274 | 1.95E-11 |
| IDI2      | -2.20286 | -7.50322 | 7.50E-11 |
| BTC       | -2.20741 | -12.242  | 4.94E-20 |
| PCP4      | -2.20776 | -5.50982 | 4.23E-07 |
| LRP1B     | -2.21157 | -10.6482 | 5.26E-17 |
| LRTM1     | -2.22939 | -7.968   | 9.27E-12 |
| SOX10     | -2.23295 | -7.11121 | 4.31E-10 |
| FGF7      | -2.23567 | -7.42421 | 1.07E-10 |
| HTN1      | -2.2398  | -4.41548 | 3.12E-05 |
| FLJ90650  | -2.2399  | -8.57237 | 6.03E-13 |
| GRIA2     | -2.24939 | -6.17398 | 2.59E-08 |
| CLGN      | -2.26217 | -8.92995 | 1.19E-13 |
| TNRC9     | -2.26328 | -8.91673 | 1.27E-13 |
| ASB15     | -2.26465 | -8.25806 | 2.50E-12 |
| OSR1      | -2.26887 | -9.3185  | 2.06E-14 |
| BAI3      | -2.27023 | -8.53013 | 7.30E-13 |
| HMGCLL1   | -2.27357 | -11.7329 | 4.46E-19 |
| TNNC2     | -2.27546 | -7.46001 | 9.10E-11 |
| CCDC110   | -2.27779 | -9.19241 | 3.64E-14 |
| MAL       | -2.27795 | -8.61471 | 4.98E-13 |
| SH3GL2    | -2.27931 | -11.2366 | 3.90E-18 |
| FNDC5     | -2.28176 | -10.7544 | 3.28E-17 |
| UNC5D     | -2.29065 | -9.50943 | 8.68E-15 |
| ANGPTL7   | -2.29519 | -10.1102 | 5.81E-16 |
| KAZALD1   | -2.29536 | -10.9139 | 1.62E-17 |
| EDN3      | -2.29699 | -8.8283  | 1.89E-13 |
| TFF3      | -2.30077 | -8.89187 | 1.42E-13 |
| CYP11A1   | -2.30124 | -12.4871 | 1.73E-20 |
| AMOT      | -2.30766 | -13.2356 | 7.36E-22 |
| BPIL1     | -2.32209 | -4.20646 | 6.71E-05 |
| KCNJ16    | -2.32339 | -7.6848  | 3.32E-11 |
| IL17D     | -2.32659 | -11.5594 | 9.49E-19 |
| SLC27A6   | -2.32876 | -20.0632 | 5.59E-33 |
| GALNTL1   | -2.33233 | -8.2665  | 2.41E-12 |
| CYP4B1    | -2.34965 | -9.03568 | 7.39E-14 |
| AADAC     | -2.3517  | -7.32529 | 1.66E-10 |
| MYOM1     | -2.36004 | -8.23032 | 2.83E-12 |
| RIC3      | -2.36051 | -12.2431 | 4.92E-20 |

|           |          |          |          |
|-----------|----------|----------|----------|
| LONRF2    | -2.36385 | -12.338  | 3.28E-20 |
| ENPP6     | -2.36499 | -7.85404 | 1.55E-11 |
| CRNN      | -2.36683 | -6.96222 | 8.34E-10 |
| ATP2A1    | -2.3692  | -6.19473 | 2.37E-08 |
| HLF       | -2.37584 | -12.0802 | 9.92E-20 |
| PRKAA2    | -2.38062 | -9.24248 | 2.90E-14 |
| YBX2      | -2.38416 | -10.6639 | 4.91E-17 |
| UPK1A     | -2.38613 | -7.19851 | 2.92E-10 |
| PENK      | -2.3895  | -7.98894 | 8.43E-12 |
| TCAP      | -2.40829 | -8.23698 | 2.75E-12 |
| ATP1A2    | -2.40874 | -6.6784  | 2.91E-09 |
| ZIM2      | -2.41251 | -8.24388 | 2.67E-12 |
| EYA2      | -2.42022 | -10.4019 | 1.58E-16 |
| CD300LG   | -2.4205  | -10.14   | 5.09E-16 |
| ASB12     | -2.42693 | -11.5603 | 9.45E-19 |
| SERPINI2  | -2.4286  | -15.9228 | 1.55E-26 |
| HFE2      | -2.42932 | -6.4427  | 8.13E-09 |
| PEG3      | -2.43552 | -9.81955 | 2.14E-15 |
| AQP7      | -2.44084 | -10.0001 | 9.53E-16 |
| MAPT      | -2.44299 | -12.6301 | 9.43E-21 |
| SCGB1D2   | -2.44396 | -6.35922 | 1.17E-08 |
| TRPV6     | -2.44401 | -11.3855 | 2.03E-18 |
| NR3C2     | -2.44631 | -11.4542 | 1.50E-18 |
| GDF8      | -2.44815 | -10.2581 | 3.00E-16 |
| FLJ23191  | -2.45625 | -11.1202 | 6.51E-18 |
| TFAP2B    | -2.46453 | -8.04228 | 6.63E-12 |
| PGAM2     | -2.47773 | -9.68024 | 4.02E-15 |
| ACTA1     | -2.4779  | -5.67428 | 2.14E-07 |
| CP        | -2.49051 | -7.48925 | 7.98E-11 |
| ROBO2     | -2.49073 | -9.22026 | 3.21E-14 |
| PIGR      | -2.4915  | -3.65175 | 0.000463 |
| SIM2      | -2.49173 | -6.60188 | 4.07E-09 |
| SORCS1    | -2.50405 | -13.1632 | 9.96E-22 |
| GADL1     | -2.50421 | -7.93733 | 1.06E-11 |
| KRTAP13-2 | -2.50597 | -5.29095 | 1.03E-06 |
| MB        | -2.51651 | -7.92027 | 1.15E-11 |
| KBTBD10   | -2.51843 | -7.51046 | 7.26E-11 |
| COBL      | -2.5187  | -13.0967 | 1.32E-21 |
| MYOZ3     | -2.52477 | -8.13958 | 4.27E-12 |
| SGCG      | -2.5315  | -8.76462 | 2.52E-13 |
| FGF10     | -2.54501 | -12.7013 | 6.97E-21 |
| KEL       | -2.54685 | -10.2607 | 2.96E-16 |
| C18orf26  | -2.56    | -8.41967 | 1.20E-12 |
| GSTA1     | -2.56673 | -6.42859 | 8.64E-09 |
| ENPP5     | -2.56923 | -12.0218 | 1.28E-19 |
| CDO1      | -2.57247 | -10.8981 | 1.74E-17 |
| SERPINA5  | -2.57842 | -12.3124 | 3.66E-20 |

|          |          |          |          |
|----------|----------|----------|----------|
| C1orf168 | -2.61394 | -8.15148 | 4.05E-12 |
| CLDN10   | -2.62507 | -7.72793 | 2.73E-11 |
| CNTFR    | -2.62746 | -12.5274 | 1.46E-20 |
| MLXIPL   | -2.63462 | -9.70966 | 3.52E-15 |
| NLGN1    | -2.63553 | -11.7404 | 4.31E-19 |
| FAM3D    | -2.64369 | -7.53677 | 6.45E-11 |
| COX6A2   | -2.64686 | -6.76438 | 1.99E-09 |
| DKK4     | -2.64865 | -7.9247  | 1.13E-11 |
| RPESP    | -2.6511  | -10.6305 | 5.69E-17 |
| MYRIP    | -2.65208 | -9.30937 | 2.14E-14 |
| SCN7A    | -2.65816 | -11.1353 | 6.09E-18 |
| CKM      | -2.68011 | -7.35161 | 1.48E-10 |
| PLA2G2A  | -2.68442 | -7.89337 | 1.30E-11 |
| IRX6     | -2.6881  | -11.9357 | 1.85E-19 |
| F10      | -2.68836 | -10.9911 | 1.15E-17 |
| TMOD4    | -2.6912  | -8.20383 | 3.20E-12 |
| THRSP    | -2.69765 | -7.09293 | 4.67E-10 |
| OGN      | -2.71162 | -10.8335 | 2.31E-17 |
| CSRP3    | -2.71574 | -5.37562 | 7.33E-07 |
| SGEF     | -2.71736 | -13.8207 | 6.53E-23 |
| PCDH20   | -2.74371 | -11.4664 | 1.42E-18 |
| TSPAN8   | -2.75543 | -14.0302 | 2.77E-23 |
| TTC6     | -2.76656 | -7.83192 | 1.71E-11 |
| CDH10    | -2.76755 | -11.1851 | 4.89E-18 |
| MYOT     | -2.77893 | -7.39997 | 1.19E-10 |
| TF       | -2.78477 | -10.0162 | 8.86E-16 |
| GPC3     | -2.79383 | -11.3553 | 2.32E-18 |
| PLD5     | -2.79847 | -10.3953 | 1.62E-16 |
| PMP2     | -2.79848 | -9.48316 | 9.77E-15 |
| VIT      | -2.80019 | -14.293  | 9.52E-24 |
| PPP1R9A  | -2.80374 | -9.23027 | 3.06E-14 |
| CKMT2    | -2.80516 | -9.18138 | 3.82E-14 |
| LHCGR    | -2.80538 | -11.686  | 5.47E-19 |
| KA21     | -2.82348 | -12.2059 | 5.77E-20 |
| SCIN     | -2.82738 | -11.6496 | 6.40E-19 |
| LINGO4   | -2.8304  | -9.519   | 8.31E-15 |
| MYL2     | -2.83365 | -6.21834 | 2.14E-08 |
| RPRML    | -2.84012 | -10.6925 | 4.32E-17 |
| MUC7     | -2.84782 | -5.19948 | 1.50E-06 |
| IGSF10   | -2.84861 | -17.6572 | 2.40E-29 |
| CA4      | -2.84989 | -11.4885 | 1.29E-18 |
| RANBP3L  | -2.85867 | -10.0154 | 8.89E-16 |
| C1QTNF7  | -2.88036 | -16.1683 | 6.05E-27 |
| KBTBD5   | -2.88237 | -7.39494 | 1.22E-10 |
| XKR4     | -2.88774 | -11.8003 | 3.33E-19 |
| TYRP1    | -2.89033 | -8.98579 | 9.27E-14 |
| C7       | -2.8996  | -9.47876 | 9.97E-15 |



|           |          |          |          |
|-----------|----------|----------|----------|
| TMPRSS11  | -2.90945 | -7.42684 | 1.06E-10 |
| APIN      | -2.91009 | -5.9431  | 6.93E-08 |
| ZDHC15    | -2.91228 | -13.7341 | 9.31E-23 |
| WNK4      | -2.93551 | -11.1403 | 5.96E-18 |
| KIAA2022  | -2.93891 | -13.5896 | 1.69E-22 |
| PCOLCE2   | -2.94546 | -11.8118 | 3.16E-19 |
| LOC124220 | -2.94913 | -5.84816 | 1.03E-07 |
| KLHDC6    | -2.94968 | -8.43622 | 1.12E-12 |
| PTGIS     | -2.97234 | -9.90146 | 1.48E-15 |
| IGSF4D    | -2.97803 | -10.6192 | 5.98E-17 |
| GSTM5     | -2.98078 | -16.3345 | 3.22E-27 |
| GATM      | -2.98172 | -16.551  | 1.42E-27 |
| LAMB4     | -2.99451 | -13.8145 | 6.69E-23 |
| LMO3      | -3.00946 | -12.8804 | 3.27E-21 |
| NRAP      | -3.02406 | -8.72901 | 2.96E-13 |
| PYGM      | -3.02569 | -10.6323 | 5.64E-17 |
| SLC6A4    | -3.02767 | -12.5326 | 1.43E-20 |
| GDF10     | -3.03266 | -13.3206 | 5.16E-22 |
| AADACL2   | -3.0399  | -7.03837 | 5.95E-10 |
| ADIPOQ    | -3.0578  | -10.6625 | 4.94E-17 |
| RPRM      | -3.07748 | -10.7311 | 3.64E-17 |
| KRT4      | -3.08004 | -7.41274 | 1.12E-10 |
| PLCXD3    | -3.08415 | -13.7623 | 8.29E-23 |
| MYH7      | -3.08587 | -7.15624 | 3.53E-10 |
| AQP4      | -3.08677 | -13.3828 | 3.98E-22 |
| CMYA3     | -3.08738 | -7.29956 | 1.86E-10 |
| SMYD1     | -3.12372 | -7.49726 | 7.70E-11 |
| PPP1R1A   | -3.12428 | -11.4892 | 1.29E-18 |
| LOC389816 | -3.13531 | -8.1518  | 4.04E-12 |
| WDR49     | -3.13599 | -13.6785 | 1.17E-22 |
| AMPD1     | -3.14601 | -9.04105 | 7.21E-14 |
| ACADL     | -3.16393 | -12.9881 | 2.08E-21 |
| KRT2B     | -3.16669 | -6.82295 | 1.54E-09 |
| SNAP91    | -3.18724 | -11.143  | 5.89E-18 |
| TMPRSS2   | -3.20366 | -7.42473 | 1.07E-10 |
| FSD2      | -3.2215  | -9.76223 | 2.78E-15 |
| CRISP2    | -3.22283 | -8.33768 | 1.74E-12 |
| CILP      | -3.23737 | -10.5857 | 6.95E-17 |
| LG11      | -3.24678 | -15.5864 | 5.66E-26 |
| KRT3      | -3.2542  | -7.93194 | 1.09E-11 |
| PPP1R3A   | -3.2767  | -8.92898 | 1.20E-13 |
| GREM2     | -3.27791 | -13.4459 | 3.07E-22 |
| CRTAC1    | -3.27814 | -14.3492 | 7.59E-24 |
| ADH1A     | -3.28443 | -10.6188 | 5.99E-17 |
| DLK1      | -3.29466 | -11.2818 | 3.20E-18 |
| LOC652744 | -3.32217 | -8.94505 | 1.11E-13 |
| FAIM2     | -3.32247 | -13.0173 | 1.84E-21 |

|          |          |          |          |
|----------|----------|----------|----------|
| CYP4F12  | -3.34458 | -9.92517 | 1.33E-15 |
| MT3      | -3.38684 | -18.5082 | 1.15E-30 |
| OCA2     | -3.38832 | -14.4468 | 5.12E-24 |
| TNMD     | -3.42725 | -18.0806 | 5.24E-30 |
| MGC26718 | -3.47354 | -10.8165 | 2.49E-17 |
| SLC36A2  | -3.5023  | -8.89525 | 1.40E-13 |
| TMEFF2   | -3.52565 | -11.9884 | 1.47E-19 |
| FLJ37266 | -3.55107 | -16.3364 | 3.19E-27 |
| C8orf22  | -3.5513  | -12.2047 | 5.80E-20 |
| MLANA    | -3.59729 | -6.80662 | 1.66E-09 |
| PIP      | -3.62034 | -5.88495 | 8.86E-08 |
| ADH1C    | -3.63518 | -12.5946 | 1.10E-20 |
| C6orf205 | -3.67573 | -10.5549 | 7.97E-17 |
| UGT1A7   | -3.69219 | -8.98459 | 9.32E-14 |
| DCT      | -3.69664 | -11.9899 | 1.46E-19 |
| ECRG4    | -3.73747 | -12.3186 | 3.56E-20 |
| CDH12    | -3.73966 | -8.66834 | 3.90E-13 |
| CRISP3   | -3.7575  | -9.20947 | 3.37E-14 |
| SCGB2A1  | -3.8167  | -9.15551 | 4.30E-14 |
| SCRG1    | -3.82229 | -12.2629 | 4.52E-20 |
| PI16     | -3.85785 | -14.3443 | 7.74E-24 |
| CASQ1    | -3.88521 | -10.7229 | 3.77E-17 |
| C6       | -3.91294 | -12.792  | 4.75E-21 |
| DLG2     | -3.93306 | -16.3124 | 3.50E-27 |
| CHRD1    | -3.96657 | -11.7945 | 3.41E-19 |
| FBP2     | -3.97805 | -13.7074 | 1.04E-22 |
| CIDEC    | -3.99384 | -11.6934 | 5.29E-19 |
| SLITRK5  | -4.01091 | -16.9885 | 2.78E-28 |
| ANGPTL5  | -4.02866 | -14.2118 | 1.32E-23 |
| CLDN8    | -4.05501 | -12.2235 | 5.35E-20 |
| C9orf152 | -4.06952 | -12.806  | 4.47E-21 |
| MYH2     | -4.07874 | -8.83682 | 1.82E-13 |
| CYP2F1   | -4.1383  | -16.5392 | 1.49E-27 |
| TCEAL2   | -4.16526 | -12.7134 | 6.62E-21 |
| FAM3B    | -4.18321 | -16.6164 | 1.11E-27 |
| CHST9    | -4.34042 | -13.1136 | 1.23E-21 |
| HMGCS2   | -4.37825 | -14.3975 | 6.25E-24 |
| MYOC     | -4.71175 | -18.0744 | 5.36E-30 |
| STATH    | -5.30964 | -14.2695 | 1.05E-23 |
| ADH1B    | -5.51874 | -17.5049 | 4.17E-29 |

The significantly changed genes of TCGA

| Downregulated |             |           | Upregulated |          |          |
|---------------|-------------|-----------|-------------|----------|----------|
| ID            | logFC       | PValue    | ID          | logFC    | PValue   |
| HTN3          | -12.6365949 | 7.23E-76  | S100A12     | 1.000418 | 0.017057 |
| BPIFA2        | -11.9261505 | 1.84E-116 | C10orf35    | 1.000457 | 5.44E-06 |
| PRH2          | -11.8829322 | 2.30E-102 | MED30       | 1.001939 | 1.38E-11 |
| HTN1          | -11.6007096 | 2.12E-130 | SLC6A11     | 1.00199  | 0.000232 |
| CST4          | -11.280711  | 3.87E-194 | MAGEB6      | 1.002587 | 0.048476 |
| SMR3B         | -11.2264643 | 8.52E-56  | MCM8        | 1.002713 | 1.09E-05 |
| LCN1          | -11.0439208 | 7.80E-154 | PFN2        | 1.003953 | 1.07E-05 |
| STATH         | -10.7663481 | 2.19E-90  | AC091180    | 1.004174 | 0.020805 |
| CST5          | -10.6159256 | 5.60E-109 | HLTF        | 1.004513 | 1.77E-06 |
| PRH1          | -10.3073654 | 1.89E-212 | TLDC1       | 1.004657 | 2.74E-09 |
| CST2          | -10.1372773 | 1.13E-218 | FPR2        | 1.005001 | 0.017373 |
| PRR27         | -9.33959254 | 1.75E-113 | TP63        | 1.007026 | 6.31E-09 |
| CA6           | -9.31551011 | 4.16E-168 | SYT12       | 1.007157 | 0.002338 |
| PIP           | -8.82090131 | 9.41E-62  | ARRDC4      | 1.007505 | 2.91E-05 |
| PRB3          | -8.55754357 | 7.69E-181 | LSR         | 1.008472 | 1.36E-11 |
| PRR4          | -7.69122509 | 5.42E-128 | KCP         | 1.009589 | 0.004087 |
| LPO           | -7.63059577 | 1.58E-123 | PTPRZ1      | 1.009737 | 7.59E-06 |
| ZG16B         | -7.51711936 | 2.56E-72  | HIST1H2BN   | 1.010219 | 0.042406 |
| CSN3          | -7.4200126  | 5.99E-106 | CENPH       | 1.010572 | 8.49E-08 |
| MUC7          | -7.25052817 | 1.59E-32  | FNDC3B      | 1.011619 | 1.77E-10 |
| KRT85         | -7.04368663 | 7.01E-109 | SIAH1       | 1.012123 | 2.56E-07 |
| THRSP         | -6.89844762 | 6.77E-120 | PLSCR1      | 1.012873 | 9.81E-10 |
| KRT36         | -6.75445931 | 1.01E-41  | TRIM46      | 1.012916 | 0.03699  |
| C6orf58       | -6.42133509 | 1.33E-42  | AC108925    | 1.013753 | 0.042406 |
| KLK1          | -6.36669563 | 1.25E-178 | TNFRSF25    | 1.013896 | 1.42E-06 |
| BPIFB1        | -6.32441066 | 6.17E-32  | LGALS3BP    | 1.014356 | 1.18E-10 |
| CRISP3        | -6.19748403 | 2.25E-51  | ATP1B3      | 1.015706 | 9.66E-11 |
| KRT84         | -6.10603551 | 2.00E-60  | ANXA13      | 1.017025 | 0.036225 |
| BPIFA1        | -6.08237859 | 2.92E-24  | RUNDC3A     | 1.017043 | 0.00266  |
| PRB4          | -6.05387218 | 1.08E-70  | FAM101B     | 1.017169 | 1.17E-07 |
| KRT35         | -5.94050782 | 3.96E-69  | BAK1        | 1.01727  | 5.32E-10 |
| KRT83         | -5.89259185 | 3.31E-59  | LIMA1       | 1.017892 | 7.50E-11 |
| PIGR          | -5.88296924 | 9.14E-47  | RTKN        | 1.018059 | 5.82E-13 |
| CST1          | -5.78152582 | 1.86E-62  | SLC2A9      | 1.018602 | 8.45E-07 |
| LACRT         | -5.7170536  | 3.46E-45  | IL27RA      | 1.01914  | 2.19E-05 |
| KRT76         | -5.62039853 | 2.07E-38  | ZNF281      | 1.019766 | 4.54E-10 |
| KRTAP11-1     | -5.59784537 | 4.31E-52  | LOXL3       | 1.020434 | 0.001277 |
| PYGM          | -5.54304623 | 3.42E-44  | LRP8        | 1.020526 | 3.28E-05 |
| C20orf85      | -5.51583484 | 1.67E-34  | ECE2        | 1.022238 | 1.88E-06 |
| MYOC          | -5.48300466 | 4.28E-78  | EMILIN1     | 1.022422 | 0.000301 |
| LTF           | -5.48205266 | 5.35E-36  | PARP9       | 1.023518 | 7.81E-09 |
| DGAT2L6       | -5.47725796 | 3.29E-53  | PDE7A       | 1.023773 | 3.34E-08 |
| HSD3B1        | -5.39714006 | 7.93E-49  | KLHL5       | 1.023831 | 8.57E-11 |
| KRT25         | -5.36300166 | 5.47E-66  | CBX3        | 1.024751 | 3.50E-19 |

|           |             |          |          |          |          |
|-----------|-------------|----------|----------|----------|----------|
| AWAT2     | -5.34318033 | 9.81E-52 | BCAM     | 1.025573 | 2.06E-05 |
| ATP2A1    | -5.28102921 | 3.29E-47 | SPSB4    | 1.026126 | 0.038555 |
| EDN3      | -5.2730385  | 2.84E-83 | MFHAS1   | 1.027057 | 3.86E-09 |
| DMBT1     | -5.25681123 | 5.08E-33 | GSDMB    | 1.028677 | 0.000567 |
| KRTAP3-1  | -5.20803977 | 8.21E-49 | HIST1H4D | 1.02899  | 0.025482 |
| KRTAP13-1 | -5.20341755 | 2.59E-54 | ADAMTS2C | 1.02901  | 0.034518 |
| KRTAP3-3  | -5.20291839 | 4.92E-56 | SKIL     | 1.029361 | 1.07E-09 |
| KRTAP13-2 | -5.15735495 | 3.76E-51 | RAD54B   | 1.029864 | 0.012093 |
| DCD       | -5.1422231  | 1.75E-16 | DDIT4    | 1.029865 | 2.41E-05 |
| KRT71     | -5.13408358 | 7.15E-62 | MPP3     | 1.029988 | 0.000929 |
| FBP2      | -5.12112415 | 2.76E-69 | SGOL1    | 1.031641 | 0.000317 |
| DHRS7C    | -5.09259009 | 8.37E-39 | RELT     | 1.032394 | 4.88E-06 |
| FABP7     | -5.07401195 | 8.26E-77 | COL8A2   | 1.034308 | 3.30E-05 |
| NXPE4     | -5.04616904 | 8.82E-52 | FLNA     | 1.034336 | 1.03E-09 |
| SMR3A     | -5.04533368 | 5.92E-41 | FKBP14   | 1.034501 | 1.68E-08 |
| PM20D1    | -5.01285743 | 8.01E-61 | FAM69A   | 1.034845 | 1.41E-11 |
| SCGB3A1   | -4.97284943 | 1.65E-26 | PDIA4    | 1.035574 | 1.28E-20 |
| KRT4      | -4.94919495 | 1.75E-34 | C19orf66 | 1.036144 | 5.68E-10 |
| AWAT1     | -4.9335999  | 4.43E-48 | SDK1     | 1.037571 | 9.68E-05 |
| LRRC26    | -4.89501705 | 1.52E-59 | ABCD1    | 1.037577 | 6.52E-08 |
| TMEM213   | -4.89302663 | 3.88E-45 | LAMC1    | 1.040015 | 4.69E-11 |
| KRTAP3-2  | -4.87164075 | 1.63E-39 | ITGAV    | 1.040235 | 4.31E-08 |
| PROL1     | -4.84764022 | 5.91E-43 | POLE2    | 1.040508 | 1.79E-06 |
| CA3       | -4.82919802 | 4.14E-52 | B4GALNT4 | 1.040969 | 0.013467 |
| AMY1B     | -4.82310956 | 6.81E-39 | DKK3     | 1.042366 | 5.64E-07 |
| GPD1      | -4.78213066 | 3.19E-82 | RAB32    | 1.042966 | 2.24E-09 |
| AZGP1     | -4.74413386 | 1.16E-42 | TMEM206  | 1.044881 | 4.38E-09 |
| ENO3      | -4.73798768 | 8.01E-56 | APBB2    | 1.045251 | 2.10E-08 |
| MYH7      | -4.71580313 | 4.17E-28 | CEP72    | 1.046273 | 2.53E-05 |
| PEBP4     | -4.69932425 | 1.85E-52 | LMNB2    | 1.046801 | 1.77E-14 |
| WFDC2     | -4.69755589 | 5.19E-42 | LAPTM4B  | 1.048861 | 2.87E-12 |
| CASQ1     | -4.67480353 | 5.31E-32 | JADE2    | 1.049023 | 2.29E-05 |
| ELOVL3    | -4.67033986 | 9.68E-85 | TICRR    | 1.049266 | 5.98E-05 |
| ADH1B     | -4.67002882 | 7.80E-78 | WNT2B    | 1.049357 | 0.005534 |
| TMPRSS11B | -4.633437   | 3.36E-36 | FAM89A   | 1.049872 | 1.23E-07 |
| DYNAP     | -4.62199687 | 3.59E-34 | PI15     | 1.050189 | 0.001659 |
| ADIPOQ    | -4.5413527  | 8.39E-51 | ACTL6A   | 1.050467 | 4.73E-13 |
| DNASE2B   | -4.52811224 | 3.54E-44 | BOP1     | 1.050743 | 5.90E-09 |
| MUC21     | -4.51974751 | 2.24E-24 | CKAP2    | 1.051657 | 1.05E-13 |
| CALML6    | -4.51090472 | 6.62E-59 | ABL2     | 1.051664 | 1.71E-09 |
| PLIN1     | -4.50880121 | 8.31E-68 | MYH10    | 1.051891 | 8.64E-09 |
| C16orf89  | -4.50731946 | 1.22E-71 | NUDT1    | 1.052831 | 3.47E-08 |
| CLCNKB    | -4.48999271 | 3.43E-54 | NAT14    | 1.054336 | 2.94E-06 |
| MAL       | -4.48711848 | 2.34E-34 | MDFI     | 1.054794 | 1.76E-08 |
| TCHH      | -4.47599061 | 3.04E-37 | SLC19A1  | 1.056359 | 0.000109 |
| FNDC5     | -4.46955578 | 4.66E-65 | ESCO2    | 1.059708 | 0.001157 |
| MYOZ1     | -4.45666079 | 1.35E-32 | ALG3     | 1.060382 | 8.90E-14 |

|          |             |           |           |          |          |
|----------|-------------|-----------|-----------|----------|----------|
| CCL28    | -4.4402552  | 7.55E-124 | SLC3A2    | 1.06185  | 2.35E-13 |
| GP2      | -4.43151861 | 9.04E-23  | HES4      | 1.062384 | 5.07E-06 |
| CFTR     | -4.40755849 | 2.01E-57  | FANCG     | 1.063046 | 1.37E-09 |
| ATP6V1B1 | -4.37246359 | 1.43E-61  | IL12RB1   | 1.06327  | 0.000621 |
| KRTAP1-3 | -4.37097222 | 1.31E-36  | HENMT1    | 1.06329  | 9.53E-08 |
| SPINK9   | -4.36708486 | 1.26E-34  | C2        | 1.064011 | 6.94E-06 |
| MB       | -4.36170888 | 5.53E-32  | HLA-C     | 1.064114 | 1.03E-08 |
| ABRA     | -4.36012826 | 3.52E-46  | MSANTD3   | 1.064398 | 3.94E-14 |
| CKM      | -4.35891185 | 1.34E-25  | DSE       | 1.064743 | 1.79E-09 |
| C8orf22  | -4.35311769 | 1.61E-32  | SP140     | 1.065335 | 0.003915 |
| PLIN4    | -4.34954771 | 8.32E-75  | WDR76     | 1.066775 | 2.92E-07 |
| LDB3     | -4.34596909 | 1.38E-36  | BCHE      | 1.066804 | 0.038259 |
| FABP9    | -4.32782662 | 1.06E-43  | IL31RA    | 1.067211 | 0.002126 |
| AQP5     | -4.32452036 | 5.36E-30  | RAI14     | 1.067228 | 9.71E-08 |
| MUC13    | -4.32167891 | 1.40E-31  | FAM24B    | 1.067488 | 0.002371 |
| SMCO1    | -4.31896192 | 1.56E-47  | SMIM3     | 1.06757  | 4.38E-08 |
| KRTAP1-1 | -4.31130334 | 7.36E-40  | SMCO2     | 1.068704 | 0.01213  |
| OLFM4    | -4.26687831 | 9.16E-23  | FPR3      | 1.069103 | 3.74E-05 |
| HMGCS2   | -4.25373731 | 2.98E-60  | AXL       | 1.069933 | 1.02E-05 |
| CIDEC    | -4.24715106 | 2.30E-58  | SMOC1     | 1.070295 | 0.025672 |
| PROM1    | -4.24582631 | 2.41E-33  | LAYN      | 1.070582 | 2.22E-05 |
| TNNC2    | -4.24115845 | 1.72E-30  | HIST1H2BF | 1.070704 | 0.008267 |
| MYH2     | -4.23443522 | 1.34E-18  | ASCL2     | 1.070872 | 0.000174 |
| SLC5A5   | -4.23078121 | 5.91E-48  | NCAPG2    | 1.070968 | 1.61E-10 |
| FBXO40   | -4.22582834 | 1.63E-38  | NUP62CL   | 1.072095 | 0.000197 |
| CRNN     | -4.22050329 | 7.35E-22  | DNM1      | 1.072154 | 7.11E-05 |
| KRT33B   | -4.21248055 | 7.21E-44  | GABRD     | 1.072612 | 0.02085  |
| SLC34A2  | -4.18594144 | 6.37E-31  | MMP19     | 1.072867 | 1.22E-05 |
| SLC13A2  | -4.18331788 | 1.01E-50  | TCF19     | 1.07356  | 4.60E-10 |
| KRTAP8-1 | -4.16605759 | 1.22E-30  | ICOS      | 1.074271 | 0.000215 |
| MS4A8    | -4.15571876 | 8.07E-35  | CENPL     | 1.075335 | 4.50E-05 |
| KRTAP1-5 | -4.14990162 | 2.81E-43  | SERINC2   | 1.075829 | 8.49E-09 |
| FAM3D    | -4.12166307 | 4.79E-51  | NCS1      | 1.075908 | 1.32E-13 |
| PDK4     | -4.11391415 | 5.91E-46  | ITGA1     | 1.076449 | 1.41E-05 |
| MYL3     | -4.10975382 | 8.20E-26  | IQCG      | 1.076751 | 0.000198 |
| PPP1R3A  | -4.07640494 | 7.75E-38  | TNFSF9    | 1.076888 | 4.15E-05 |
| MYLK3    | -4.05301434 | 2.15E-34  | FYB       | 1.078632 | 0.000165 |
| MYOM1    | -4.05272068 | 5.10E-38  | CCBE1     | 1.078927 | 0.009943 |
| DLK1     | -4.0526696  | 3.79E-43  | ASPHD2    | 1.079641 | 1.06E-06 |
| HSPB6    | -4.04274386 | 8.98E-37  | IL18BP    | 1.0802   | 4.54E-05 |
| SLC2A4   | -4.03829185 | 2.37E-57  | PILRB     | 1.080866 | 0.004772 |
| AMPD1    | -4.03674931 | 1.59E-34  | FRMD5     | 1.081267 | 0.022242 |
| COX6A2   | -4.02684775 | 3.72E-23  | GPR161    | 1.081703 | 1.63E-05 |
| MYBPC1   | -4.00063737 | 2.11E-21  | HLA-A     | 1.081881 | 1.20E-08 |
| LYZ      | -3.99951893 | 1.12E-68  | MICALCL   | 1.081997 | 6.17E-05 |
| KRTAP4-6 | -3.98750494 | 2.06E-30  | SFXN3     | 1.083174 | 4.62E-12 |
| MUC5AC   | -3.98695933 | 8.72E-21  | MYO7A     | 1.083209 | 0.002643 |

|          |             |          |           |          |          |
|----------|-------------|----------|-----------|----------|----------|
| CIDEA    | -3.98061792 | 7.77E-60 | GALNT2    | 1.084494 | 1.13E-14 |
| CYP2F1   | -3.97384726 | 2.10E-44 | C1orf112  | 1.084648 | 0.00012  |
| ACTA1    | -3.96759592 | 2.22E-19 | CALU      | 1.084725 | 9.14E-14 |
| BPIFB2   | -3.9641595  | 6.41E-10 | CD274     | 1.085238 | 0.000416 |
| SMYD1    | -3.93740729 | 5.04E-30 | HELLS     | 1.086033 | 1.61E-05 |
| ATP1A2   | -3.93527767 | 6.50E-29 | XPR1      | 1.087095 | 3.76E-13 |
| FOLR1    | -3.92954595 | 1.12E-31 | F2R       | 1.087348 | 5.42E-08 |
| C1orf194 | -3.91769078 | 7.47E-33 | HSD17B3   | 1.088184 | 0.030518 |
| PRB1     | -3.91390573 | 2.31E-32 | PDZD7     | 1.088426 | 0.028999 |
| PPP1R1A  | -3.90353482 | 2.08E-26 | ULBP3     | 1.088562 | 1.84E-06 |
| FAM216B  | -3.90049229 | 7.26E-31 | HAGHL     | 1.088596 | 0.002006 |
| MT1A     | -3.88811578 | 1.48E-61 | PCDHGB2   | 1.08949  | 0.003164 |
| LMOD2    | -3.88745535 | 2.17E-22 | TINAGL1   | 1.090179 | 1.95E-05 |
| TESC     | -3.86038616 | 8.33E-67 | ELFN2     | 1.090486 | 0.029404 |
| CKMT2    | -3.84015227 | 1.67E-30 | HIST1H2BE | 1.090611 | 0.029928 |
| CHRM1    | -3.83834416 | 1.89E-32 | STAT4     | 1.090663 | 0.003967 |
| XIRP1    | -3.81615124 | 1.18E-34 | APOL2     | 1.090702 | 1.27E-07 |
| WDR38    | -3.7985106  | 2.64E-36 | QSOX2     | 1.090868 | 1.69E-12 |
| MYLPF    | -3.79530976 | 3.68E-24 | PODNL1    | 1.091434 | 7.61E-06 |
| ASCL3    | -3.78893564 | 4.38E-34 | L3HYPDH   | 1.091559 | 5.17E-06 |
| KRT78    | -3.78868665 | 1.26E-33 | BRCA1     | 1.091681 | 6.18E-07 |
| SEC14L6  | -3.7850019  | 2.30E-37 | IL21R     | 1.091954 | 0.002217 |
| RPL3L    | -3.78253744 | 4.45E-51 | FMNL3     | 1.09249  | 1.47E-07 |
| KRT33A   | -3.7746398  | 1.86E-45 | FCHO1     | 1.092918 | 0.001851 |
| HFE2     | -3.76674231 | 1.24E-25 | BRCA2     | 1.094254 | 0.001722 |
| LDLRAD1  | -3.75280733 | 2.69E-35 | MYBL1     | 1.094503 | 0.009203 |
| MYL2     | -3.74497284 | 1.63E-17 | HIST1H3D  | 1.095496 | 0.000112 |
| TRDN     | -3.73922045 | 2.57E-23 | DDX11     | 1.095534 | 2.43E-07 |
| MYOZ3    | -3.73187187 | 2.49E-30 | CLDN14    | 1.095745 | 0.037916 |
| TCAP     | -3.72940557 | 2.73E-20 | BCL2L12   | 1.097196 | 4.42E-13 |
| TYRP1    | -3.72763605 | 7.83E-39 | TRIB3     | 1.097224 | 5.21E-07 |
| ASB11    | -3.72210124 | 1.03E-29 | GALNS     | 1.098902 | 6.73E-10 |
| TMEM190  | -3.72083217 | 4.61E-35 | ZNF707    | 1.099009 | 4.70E-07 |
| KRTAP4-9 | -3.71902616 | 7.22E-27 | RDM1      | 1.100684 | 0.032831 |
| SH3BGRL2 | -3.70252624 | 2.84E-93 | FAAP24    | 1.100967 | 4.12E-06 |
| CMYA5    | -3.70170049 | 1.36E-27 | TMEM229f  | 1.101345 | 5.75E-05 |
| MYL1     | -3.69965022 | 1.06E-16 | JAML      | 1.101651 | 0.017301 |
| KRT13    | -3.69942687 | 2.56E-23 | TRIM59    | 1.102193 | 0.000151 |
| KLHL41   | -3.69173213 | 1.26E-18 | AKR1E2    | 1.102197 | 0.005623 |
| IL36A    | -3.67459071 | 7.47E-23 | MEFV      | 1.102971 | 0.0034   |
| GJB1     | -3.67293785 | 1.73E-36 | CD109     | 1.103113 | 6.31E-11 |
| FITM1    | -3.66473927 | 1.69E-37 | SLC16A3   | 1.103922 | 2.86E-08 |
| SFTA2    | -3.65068884 | 1.20E-37 | SEC14L2   | 1.105082 | 8.17E-06 |
| PLEKHS1  | -3.64533237 | 1.01E-37 | TYMS      | 1.10552  | 3.60E-09 |
| KRTAP9-3 | -3.64464445 | 8.44E-27 | TRPM2     | 1.106732 | 6.57E-05 |
| MORN5    | -3.64146979 | 4.84E-27 | DLGAP3    | 1.107451 | 0.025263 |
| KRT31    | -3.63887508 | 4.55E-70 | SPERT     | 1.107631 | 0.025109 |

|           |             |          |           |          |          |
|-----------|-------------|----------|-----------|----------|----------|
| RSPH1     | -3.63637214 | 4.49E-37 | ENTPD7    | 1.109758 | 3.38E-09 |
| SMTNL1    | -3.6320794  | 2.19E-30 | MARCKSL1  | 1.110117 | 5.84E-10 |
| MYOT      | -3.62884423 | 1.71E-23 | CHPF      | 1.110344 | 1.35E-10 |
| ATP6VOA4  | -3.62723522 | 4.05E-70 | DSN1      | 1.111613 | 4.53E-11 |
| NRAP      | -3.6235921  | 4.38E-16 | MAP4K2    | 1.113354 | 3.97E-09 |
| TNNI2     | -3.61283599 | 1.42E-24 | DBF4B     | 1.113355 | 0.00046  |
| SYPL2     | -3.58986484 | 5.81E-32 | SOX30     | 1.113505 | 0.036641 |
| MT4       | -3.56593998 | 5.20E-23 | PPP1R14C  | 1.114263 | 1.12E-09 |
| SRL       | -3.55384867 | 3.69E-27 | HIST1H2AC | 1.115395 | 0.000232 |
| C7        | -3.55226767 | 1.69E-35 | CDR2L     | 1.116403 | 4.46E-08 |
| TF        | -3.5479683  | 1.80E-31 | GZMB      | 1.116644 | 0.000575 |
| KIAA1324  | -3.54794782 | 5.45E-35 | HAUS8     | 1.116938 | 1.28E-05 |
| HBA2      | -3.5473265  | 4.60E-41 | CCDC14    | 1.117041 | 2.49E-06 |
| SPDEF     | -3.54560937 | 2.74E-24 | CCNE2     | 1.117448 | 0.000454 |
| KRTAP4-7  | -3.54149566 | 1.71E-25 | JAG1      | 1.117532 | 4.58E-11 |
| AADACL3   | -3.53514579 | 5.13E-21 | TAP2      | 1.117615 | 9.53E-11 |
| NT5C1A    | -3.52665346 | 1.37E-30 | PPP1R18   | 1.117856 | 3.74E-19 |
| WIF1      | -3.52464633 | 8.34E-19 | POU3F1    | 1.118175 | 0.000533 |
| TMEM52    | -3.52250883 | 2.89E-62 | XKR9      | 1.118438 | 0.006492 |
| S100A1    | -3.51374896 | 7.92E-40 | IRF7      | 1.118699 | 1.19E-06 |
| KRT3      | -3.51232439 | 9.09E-18 | HIST1H2BG | 1.119879 | 6.36E-05 |
| ZMYND10   | -3.51173621 | 3.69E-32 | NKX6-1    | 1.120001 | 0.039198 |
| CHI3L2    | -3.510247   | 1.41E-50 | ANKLE1    | 1.121195 | 0.039481 |
| COX7A1    | -3.50806787 | 1.17E-56 | KIF11     | 1.121293 | 6.30E-13 |
| CAPSL     | -3.50585485 | 1.12E-27 | PDIA5     | 1.12154  | 1.02E-12 |
| NCMAP     | -3.49792233 | 1.57E-38 | TIGIT     | 1.123338 | 0.00032  |
| KRTAP2-2  | -3.4974126  | 5.71E-24 | CENPW     | 1.123612 | 3.60E-09 |
| MYH6      | -3.49132869 | 1.45E-21 | ANTXR2    | 1.124158 | 1.24E-05 |
| LRTM1     | -3.48602281 | 2.05E-27 | NLRC5     | 1.12434  | 5.73E-09 |
| FMO2      | -3.48124211 | 3.15E-38 | BTBD16    | 1.126456 | 0.043477 |
| CACNA1S   | -3.48012314 | 1.14E-22 | KRT37     | 1.127109 | 0.027727 |
| TNNC1     | -3.47024711 | 1.21E-17 | STK17A    | 1.127767 | 9.08E-11 |
| C9orf24   | -3.46866583 | 4.06E-36 | POU5F1    | 1.128086 | 0.010283 |
| LY6G6D    | -3.46563693 | 6.13E-28 | DHDH      | 1.128908 | 0.001825 |
| TGM3      | -3.45893179 | 9.12E-17 | TM4SF19-T | 1.129157 | 0.024359 |
| FAM107A   | -3.45367569 | 1.23E-71 | CYP2W1    | 1.129669 | 0.04825  |
| AGR3      | -3.45331091 | 1.66E-22 | LRP12     | 1.129988 | 3.83E-07 |
| CHST9     | -3.45052025 | 2.60E-35 | DDIAS     | 1.130006 | 2.52E-06 |
| FHL1      | -3.4299529  | 5.47E-37 | CENPM     | 1.13071  | 5.40E-08 |
| CAPN14    | -3.42346989 | 4.11E-32 | KIR2DL4   | 1.131379 | 0.007888 |
| PLN       | -3.41299553 | 4.80E-35 | HAS2      | 1.131743 | 0.000357 |
| GSTA2     | -3.41297567 | 5.33E-17 | TFRC      | 1.132185 | 9.75E-08 |
| KRTAP4-2  | -3.41168665 | 1.27E-24 | DCUN1D5   | 1.132767 | 1.87E-06 |
| ACSBG1    | -3.4102375  | 4.80E-29 | TMEM150E  | 1.132813 | 0.002935 |
| CYP4B1    | -3.39999867 | 1.94E-33 | IMPDH1    | 1.132859 | 3.09E-12 |
| KRTAP4-12 | -3.39158874 | 9.85E-23 | SLC20A1   | 1.133753 | 1.34E-12 |
| MUC5B     | -3.39109857 | 8.08E-09 | CYP26B1   | 1.135122 | 6.71E-05 |

|          |             |          |          |          |          |
|----------|-------------|----------|----------|----------|----------|
| NEB      | -3.38735595 | 1.14E-19 | PCED1B   | 1.13618  | 1.89E-08 |
| C9orf152 | -3.38203533 | 4.65E-40 | KNSTRN   | 1.136322 | 5.39E-13 |
| TCEAL2   | -3.3773949  | 1.91E-37 | FBLIM1   | 1.136579 | 1.15E-09 |
| KLHL33   | -3.36341721 | 1.85E-28 | PCDHGB1  | 1.139869 | 0.020587 |
| RPTN     | -3.36108707 | 5.89E-19 | TNFSF10  | 1.139913 | 1.05E-07 |
| TTN      | -3.36073283 | 6.09E-20 | GYLTL1B  | 1.140206 | 7.13E-08 |
| TSPAN8   | -3.36058396 | 1.36E-34 | SLC47A2  | 1.140471 | 0.002482 |
| PPP1R1B  | -3.356867   | 1.25E-17 | IFITM3   | 1.140572 | 1.19E-08 |
| KRT79    | -3.34681099 | 1.28E-17 | PRAP1    | 1.141482 | 0.037112 |
| RSPH4A   | -3.34611833 | 7.01E-29 | SMC4     | 1.141741 | 1.11E-09 |
| PKLR     | -3.33341185 | 5.53E-27 | PAPLN    | 1.14175  | 1.02E-05 |
| SLC25A4  | -3.33167081 | 1.58E-72 | MSI1     | 1.143715 | 0.021197 |
| SPRR3    | -3.32877112 | 4.43E-20 | HOXB6    | 1.144502 | 0.011291 |
| KLHL40   | -3.3093758  | 6.69E-20 | SCRN1    | 1.1455   | 1.92E-14 |
| PI16     | -3.30454808 | 6.89E-22 | FOXI3    | 1.14554  | 0.030121 |
| SH3BGR   | -3.30427679 | 5.27E-51 | MEI1     | 1.146558 | 0.012177 |
| TGM7     | -3.30392852 | 1.25E-26 | FBXL6    | 1.146647 | 3.62E-11 |
| KRTAP9-4 | -3.29673913 | 8.50E-24 | AC242988 | 1.148419 | 0.02638  |
| ARSF     | -3.29668586 | 1.13E-33 | HEYL     | 1.148661 | 2.86E-06 |
| CLCA4    | -3.28827926 | 5.78E-29 | SLC52A2  | 1.14872  | 2.31E-16 |
| SCGB1A1  | -3.27209908 | 1.66E-11 | DNA2     | 1.148981 | 7.86E-05 |
| KRTAP2-4 | -3.27125353 | 1.16E-21 | AL589743 | 1.149043 | 0.042406 |
| DCT      | -3.26117818 | 1.12E-16 | GJB4     | 1.149571 | 2.76E-05 |
| CLEC3B   | -3.25801192 | 1.80E-84 | SLC11A1  | 1.149607 | 0.000158 |
| EEF1A2   | -3.25034644 | 2.66E-24 | CENPK    | 1.150461 | 2.42E-05 |
| DUSP13   | -3.24562381 | 3.05E-27 | TSHZ3    | 1.152657 | 1.01E-07 |
| KRT28    | -3.24159315 | 3.16E-22 | LRRC17   | 1.153784 | 0.002971 |
| TCN1     | -3.23316462 | 3.58E-25 | FBXO41   | 1.153935 | 3.93E-05 |
| PHKG1    | -3.22574176 | 1.04E-33 | PBK      | 1.154893 | 7.30E-08 |
| CCDC160  | -3.21982606 | 6.53E-30 | RHBDL1   | 1.15677  | 0.001854 |
| EXTL1    | -3.21454628 | 8.21E-27 | ABCC5    | 1.156824 | 5.39E-06 |
| ROPN1L   | -3.21283521 | 6.69E-26 | ANGPT2   | 1.157694 | 2.43E-06 |
| TRIM63   | -3.21029692 | 9.52E-19 | THY1     | 1.158282 | 1.07E-05 |
| LRRC2    | -3.20471491 | 3.09E-28 | ADAMTS15 | 1.158486 | 5.35E-05 |
| C9orf135 | -3.2029828  | 1.75E-23 | SGOL2    | 1.161009 | 1.62E-06 |
| ACTN2    | -3.19162907 | 3.13E-13 | TBX4     | 1.161379 | 0.033253 |
| TFF1     | -3.18921773 | 2.83E-11 | RACGAP1  | 1.162308 | 5.11E-17 |
| ENPP3    | -3.18803974 | 4.75E-27 | FAM111B  | 1.163203 | 2.23E-07 |
| CLDN10   | -3.17092334 | 1.25E-14 | PTTG1    | 1.164509 | 1.62E-09 |
| GPT      | -3.17045488 | 7.47E-51 | FKBP9    | 1.164964 | 3.80E-17 |
| KRT27    | -3.17017196 | 4.00E-17 | PI3      | 1.165279 | 0.008925 |
| ANGPTL1  | -3.1690283  | 3.15E-40 | HMX2     | 1.165518 | 0.022882 |
| TEKT1    | -3.16851207 | 2.10E-22 | CIT      | 1.165996 | 2.50E-07 |
| SLC44A4  | -3.16371935 | 3.39E-26 | BAIAP2L2 | 1.166067 | 4.38E-06 |
| MPO      | -3.15916154 | 4.82E-25 | PXN      | 1.166417 | 1.57E-12 |
| ASB10    | -3.15896071 | 1.06E-23 | SLC7A5   | 1.166512 | 5.09E-08 |
| ART1     | -3.15720861 | 7.97E-24 | FBXO39   | 1.166639 | 0.02138  |



|              |             |          |           |          |          |
|--------------|-------------|----------|-----------|----------|----------|
| TCHHL1       | -3.1538003  | 2.40E-18 | SEMA3A    | 1.168005 | 0.001732 |
| KRTAP10-3    | -3.14963876 | 1.21E-20 | XRCC3     | 1.168333 | 6.22E-07 |
| C2orf40      | -3.14842851 | 3.28E-31 | WNT6      | 1.168389 | 0.02029  |
| KRTAP10-10   | -3.14521242 | 2.37E-19 | ATHL1     | 1.169912 | 9.51E-06 |
| ENDOU        | -3.14376087 | 4.82E-25 | CTC-479C5 | 1.170021 | 0.047393 |
| KRTAP4-4     | -3.1345055  | 2.95E-20 | STMN1     | 1.170538 | 6.37E-12 |
| KRTAP7-1     | -3.13328763 | 4.19E-21 | C14orf80  | 1.172029 | 5.56E-07 |
| SLC25A34     | -3.13084379 | 2.72E-38 | GPR19     | 1.172426 | 0.011916 |
| UNC45B       | -3.11330124 | 1.13E-20 | IRF9      | 1.172748 | 9.65E-05 |
| XIRP2        | -3.11278779 | 6.52E-12 | EHD2      | 1.172777 | 4.92E-14 |
| PLEKHB1      | -3.11276871 | 3.63E-42 | KLHL35    | 1.1729   | 0.019938 |
| SCN4A        | -3.10379154 | 6.35E-21 | GRIA3     | 1.173123 | 0.030199 |
| PADI2        | -3.10116201 | 6.94E-27 | DIAPH3    | 1.173218 | 1.88E-06 |
| FAM3B        | -3.10033393 | 3.71E-19 | HIST1H1B  | 1.173723 | 0.013469 |
| RP11-766F14. | -3.09598287 | 2.73E-24 | C1QL4     | 1.173752 | 0.025072 |
| PKIA         | -3.09528514 | 1.41E-36 | CCM2      | 1.175337 | 2.81E-11 |
| ACTN3        | -3.09367625 | 3.24E-23 | PRF1      | 1.175368 | 6.59E-05 |
| HBB          | -3.09323296 | 1.38E-26 | MCM7      | 1.176744 | 1.16E-13 |
| MYLK2        | -3.09221595 | 1.86E-25 | GLI1      | 1.177554 | 0.004594 |
| TMC5         | -3.0917351  | 2.19E-33 | DTX3L     | 1.177972 | 2.66E-14 |
| DEPTOR       | -3.08804264 | 3.13E-64 | IKBIP     | 1.178981 | 6.00E-12 |
| MOGAT2       | -3.0866816  | 2.48E-22 | BFSP1     | 1.179504 | 5.04E-05 |
| OBSCN        | -3.08326562 | 2.02E-45 | SALL4     | 1.179576 | 0.028999 |
| KLHL38       | -3.08060358 | 1.19E-24 | PRSS23    | 1.181347 | 4.83E-07 |
| DUSP26       | -3.07203048 | 1.84E-18 | TIMELESS  | 1.181382 | 1.02E-15 |
| PSAPL1       | -3.06638219 | 3.19E-22 | GMNN      | 1.181555 | 7.69E-12 |
| SAA2         | -3.06579135 | 1.91E-28 | LOX       | 1.181797 | 3.81E-05 |
| TNNT3        | -3.06537975 | 1.47E-16 | CHST15    | 1.182233 | 1.44E-13 |
| TNNT1        | -3.06151545 | 1.98E-28 | LPAR3     | 1.183645 | 4.14E-09 |
| FRZB         | -3.0578976  | 4.82E-51 | RAC3      | 1.183859 | 5.22E-05 |
| FUT6         | -3.05665241 | 5.92E-29 | ACP5      | 1.184154 | 2.02E-09 |
| PIFO         | -3.05534301 | 5.42E-28 | KHDC1     | 1.184534 | 0.004257 |
| CLIC5        | -3.05352598 | 1.33E-31 | SP110     | 1.185556 | 5.47E-07 |
| FSD2         | -3.05330016 | 1.42E-22 | VSIG1     | 1.185771 | 0.010609 |
| MGP          | -3.05078211 | 1.20E-48 | IFNG      | 1.185925 | 0.005969 |
| NXPE2        | -3.04854878 | 6.07E-21 | AJUBA     | 1.186385 | 2.71E-11 |
| SMTNL2       | -3.04793278 | 5.04E-17 | FANCB     | 1.18668  | 0.001941 |
| KRTAP12-1    | -3.04403513 | 4.08E-19 | AGTRAP    | 1.187076 | 2.22E-13 |
| TIMP4        | -3.03432217 | 3.67E-41 | GALNT18   | 1.188469 | 2.31E-13 |
| CHRD1        | -3.02855193 | 1.58E-27 | SEMA7A    | 1.189266 | 2.81E-07 |
| KRTAP9-9     | -3.02681822 | 2.08E-19 | PIK3CD    | 1.190068 | 2.79E-10 |
| LMOD3        | -3.02624093 | 1.87E-16 | CENPN     | 1.190356 | 1.09E-12 |
| PLIN5        | -3.02502092 | 8.81E-36 | STC1      | 1.19113  | 0.000269 |
| SLC38A3      | -3.02342593 | 1.38E-32 | BCAS4     | 1.191968 | 0.000124 |
| FABP3        | -3.02054782 | 7.62E-32 | PLK4      | 1.192173 | 4.01E-09 |
| CGNL1        | -3.01528277 | 1.18E-53 | RGS20     | 1.19236  | 9.19E-06 |
| TXLNB        | -3.0133002  | 4.15E-24 | MYO1G     | 1.193532 | 2.49E-05 |

|           |             |          |           |          |          |
|-----------|-------------|----------|-----------|----------|----------|
| SPAG6     | -3.01275732 | 1.47E-18 | MCM5      | 1.194944 | 2.49E-14 |
| MYPN      | -3.00452476 | 1.47E-17 | MCM4      | 1.19495  | 2.62E-15 |
| LRRC39    | -2.99906077 | 9.95E-28 | PDGFRB    | 1.194993 | 1.48E-06 |
| C10orf71  | -2.99869573 | 1.05E-15 | FBXO2     | 1.195382 | 4.76E-05 |
| AQP4      | -2.99373233 | 8.86E-23 | EDIL3     | 1.195951 | 8.84E-05 |
| BHLHA15   | -2.99318811 | 9.28E-28 | ADRA1B    | 1.197292 | 0.03952  |
| CRISP2    | -2.99165918 | 8.85E-21 | MOB3B     | 1.198148 | 2.77E-08 |
| CAPN3     | -2.98757279 | 1.91E-28 | TNFSF11   | 1.199471 | 0.009061 |
| FA2H      | -2.98640052 | 5.78E-33 | LRRC3     | 1.199511 | 6.98E-06 |
| NDRG2     | -2.9826776  | 8.20E-80 | BEND6     | 1.200298 | 0.001601 |
| KRTAP12-2 | -2.98240332 | 1.31E-18 | FAM72B    | 1.200431 | 0.010609 |
| APOBEC2   | -2.9805255  | 1.95E-14 | HIST1H2AL | 1.200647 | 0.017967 |
| KRTAP4-8  | -2.97685839 | 1.05E-19 | ELFN1     | 1.20085  | 0.000961 |
| HHATL     | -2.97645401 | 3.54E-17 | GPR68     | 1.201181 | 1.85E-07 |
| CYP3A5    | -2.97479243 | 2.96E-37 | FZD6      | 1.20128  | 4.43E-13 |
| RORC      | -2.97271921 | 1.40E-50 | SCARF2    | 1.202218 | 7.57E-05 |
| AADAC     | -2.96942548 | 6.37E-21 | TAF7L     | 1.202607 | 0.041351 |
| SNTN      | -2.96795266 | 1.60E-17 | NCAPD2    | 1.202957 | 8.14E-13 |
| MYBPC2    | -2.96706467 | 1.15E-12 | PAX5      | 1.203075 | 0.017422 |
| ACKR1     | -2.96667634 | 3.10E-36 | NDE1      | 1.203682 | 1.36E-16 |
| PPP1R3C   | -2.96063413 | 4.27E-34 | ACAN      | 1.203765 | 0.019376 |
| ASB15     | -2.95000277 | 2.67E-20 | TPCN2     | 1.205604 | 1.86E-05 |
| CRYM      | -2.94851982 | 3.73E-32 | CSMD2     | 1.207587 | 0.020761 |
| CSN2      | -2.94771454 | 1.47E-20 | ACKR3     | 1.207702 | 1.75E-06 |
| HAO2      | -2.93658534 | 7.44E-20 | TDRD5     | 1.207755 | 0.011136 |
| SGCA      | -2.93416132 | 1.57E-20 | FERMT1    | 1.207798 | 2.18E-08 |
| SLN       | -2.93308954 | 1.27E-11 | GJA1      | 1.208988 | 3.47E-07 |
| MYOM2     | -2.93239165 | 1.37E-23 | LRRN4     | 1.209078 | 0.028118 |
| NRG2      | -2.93148727 | 1.71E-26 | PTPRN     | 1.20961  | 0.033596 |
| FXYD1     | -2.93146137 | 3.21E-27 | SAMD9     | 1.210161 | 1.79E-06 |
| AMOT      | -2.92734458 | 3.56E-33 | RRM2      | 1.210775 | 2.50E-12 |
| KRTAP2-1  | -2.92726763 | 3.42E-17 | MET       | 1.211717 | 1.09E-11 |
| IL22      | -2.92607443 | 4.90E-20 | SOX12     | 1.213165 | 2.16E-09 |
| FAM92B    | -2.92414759 | 6.43E-21 | MSC       | 1.214026 | 1.05E-05 |
| SLC27A6   | -2.92078797 | 5.88E-27 | FCGR2A    | 1.216843 | 2.45E-07 |
| ATP2B2    | -2.91946677 | 1.60E-20 | EGLN3     | 1.217204 | 3.01E-05 |
| ZBTB16    | -2.91862231 | 2.84E-28 | MSN       | 1.217851 | 5.82E-15 |
| SYNPO2L   | -2.90986035 | 1.46E-21 | OBP2A     | 1.218448 | 0.026559 |
| RYR1      | -2.90548722 | 7.92E-30 | PABPC1L   | 1.219018 | 3.73E-05 |
| APOD      | -2.9022766  | 7.24E-32 | CT62      | 1.221845 | 0.021039 |
| STOML3    | -2.89657883 | 8.19E-17 | NRM       | 1.222009 | 1.45E-17 |
| AQP7      | -2.89638914 | 8.59E-25 | CENPO     | 1.223827 | 1.59E-08 |
| OMG       | -2.89378566 | 2.62E-20 | SYT1      | 1.224755 | 0.006387 |
| C5orf46   | -2.89321083 | 7.33E-29 | HOXA9     | 1.224845 | 0.01654  |
| ETNPPL    | -2.88748159 | 7.80E-16 | CHEK1     | 1.225411 | 4.95E-10 |
| C5orf49   | -2.88545872 | 2.15E-18 | AFAP1L2   | 1.226713 | 3.66E-12 |
| MGAM2     | -2.88230067 | 8.32E-17 | TFAP2E    | 1.227743 | 4.23E-05 |

|          |             |          |            |          |          |
|----------|-------------|----------|------------|----------|----------|
| PLAC9    | -2.88027232 | 1.11E-52 | GLI2       | 1.227745 | 0.00258  |
| KLF15    | -2.87417683 | 1.31E-34 | VOPP1      | 1.228419 | 1.23E-07 |
| PADI1    | -2.87414223 | 3.63E-26 | PIPOX      | 1.229938 | 0.009528 |
| VSIG2    | -2.86988702 | 2.34E-24 | RNF212     | 1.22996  | 0.01367  |
| TPM2     | -2.86941703 | 7.65E-37 | FAM26F     | 1.230201 | 1.74E-05 |
| NR3C2    | -2.85943991 | 4.78E-33 | EMP3       | 1.231302 | 7.64E-09 |
| SPX      | -2.85942258 | 1.87E-21 | STK31      | 1.232057 | 0.016786 |
| ANO5     | -2.85755315 | 2.48E-23 | CCR8       | 1.232545 | 0.002186 |
| STAC3    | -2.85553306 | 6.09E-19 | BAALC      | 1.233282 | 0.005259 |
| LRRC46   | -2.85457634 | 9.76E-26 | CTTN       | 1.233796 | 1.15E-06 |
| SELENBP1 | -2.85310117 | 1.10E-47 | ERVMER34   | 1.234558 | 5.46E-06 |
| ADCK3    | -2.84873266 | 1.11E-47 | KCNS1      | 1.234763 | 0.011351 |
| DNAI1    | -2.84832659 | 4.53E-16 | BICD1      | 1.235197 | 5.95E-05 |
| GDF10    | -2.84489871 | 4.12E-28 | CRYBA2     | 1.236345 | 0.025773 |
| HRC      | -2.84156398 | 1.98E-15 | CHSY3      | 1.236438 | 0.000387 |
| TYR      | -2.83679457 | 2.01E-17 | PRNP       | 1.236898 | 8.36E-13 |
| PMEL     | -2.83506883 | 2.85E-34 | HTRA1      | 1.238106 | 2.19E-08 |
| KY       | -2.82962835 | 2.42E-22 | MYL4       | 1.238139 | 0.021311 |
| ERICH3   | -2.82881632 | 5.87E-18 | OSR2       | 1.238993 | 1.99E-08 |
| TMEM38A  | -2.82868116 | 1.79E-32 | SLC39A4    | 1.239056 | 4.76E-08 |
| MYF6     | -2.82761727 | 6.81E-13 | USB1       | 1.240815 | 7.92E-19 |
| MYH11    | -2.8222174  | 1.50E-25 | ZWINT      | 1.241664 | 3.79E-15 |
| CCER2    | -2.82050812 | 9.61E-22 | CARD11     | 1.242884 | 6.36E-05 |
| SPINK5   | -2.81460112 | 2.96E-24 | BMP8B      | 1.243595 | 0.000239 |
| SERPINA5 | -2.81400683 | 6.31E-21 | GINS4      | 1.243932 | 4.35E-06 |
| ALDH1L1  | -2.81247245 | 1.89E-26 | PRIM2      | 1.2455   | 2.11E-10 |
| TMOD1    | -2.80543296 | 4.16E-23 | PTPRD      | 1.245679 | 0.001549 |
| KRT86    | -2.80358187 | 3.35E-30 | OAS1       | 1.246006 | 8.69E-08 |
| KRT32    | -2.80354034 | 2.66E-22 | KIRREL     | 1.247626 | 4.09E-12 |
| CAV3     | -2.80098315 | 1.64E-17 | L1CAM      | 1.247861 | 0.002205 |
| TLE2     | -2.79572022 | 1.26E-56 | HTR2C      | 1.248583 | 0.030923 |
| C1orf189 | -2.79011171 | 1.24E-19 | LILRB4     | 1.248844 | 0.000116 |
| TRIM54   | -2.78977138 | 1.50E-15 | IQCJ-SCHIP | 1.249082 | 0.000467 |
| LECT1    | -2.78235213 | 3.35E-19 | C18orf54   | 1.249399 | 0.000264 |
| ACSM6    | -2.78225769 | 4.16E-17 | STAT2      | 1.250471 | 6.69E-15 |
| SLC5A8   | -2.77798046 | 4.59E-20 | FJX1       | 1.250478 | 1.19E-09 |
| DUPD1    | -2.77717435 | 2.40E-18 | TBX18      | 1.251383 | 0.000206 |
| MUSTN1   | -2.77642239 | 1.05E-18 | HIST1H2BC  | 1.252543 | 2.42E-06 |
| MAPT     | -2.76469891 | 1.42E-27 | NAV1       | 1.252551 | 2.14E-11 |
| CAND2    | -2.76338966 | 8.24E-30 | TMSB10     | 1.252607 | 5.59E-09 |
| NMRK2    | -2.76251263 | 8.09E-13 | EIF2AK2    | 1.253851 | 4.41E-17 |
| TUSC5    | -2.76004126 | 2.07E-19 | GZMA       | 1.254    | 0.000241 |
| SBK2     | -2.75112731 | 2.45E-17 | FANCA      | 1.254213 | 6.75E-06 |
| ADPRHL1  | -2.7488446  | 1.97E-41 | FGD6       | 1.254954 | 8.47E-13 |
| LRRC10B  | -2.74734875 | 2.85E-21 | CD80       | 1.255511 | 0.002716 |
| CLU      | -2.74724603 | 1.35E-33 | RNASEH2A   | 1.257256 | 2.64E-14 |
| ASB12    | -2.74459668 | 8.76E-20 | TLL1       | 1.257785 | 0.000904 |

|             |             |          |          |          |          |
|-------------|-------------|----------|----------|----------|----------|
| GPD1L       | -2.74028524 | 1.42E-85 | SYNGR4   | 1.257897 | 0.014899 |
| SGCG        | -2.7397801  | 1.10E-16 | HLA-B    | 1.258315 | 8.25E-10 |
| KRTAP10-5   | -2.73673523 | 1.70E-16 | ESPNL    | 1.25877  | 0.011008 |
| PNPLA5      | -2.72861892 | 4.46E-16 | SLC5A12  | 1.259769 | 0.028564 |
| DES         | -2.71148836 | 6.27E-10 | DSCAM    | 1.260062 | 0.012809 |
| LRRC14B     | -2.71060471 | 6.70E-20 | TMEM44   | 1.260358 | 1.28E-08 |
| GREM2       | -2.70867907 | 3.30E-25 | SEMA4F   | 1.260399 | 2.75E-07 |
| PPARGC1A    | -2.70760798 | 3.71E-29 | NFE2L3   | 1.26095  | 5.31E-07 |
| FAM166B     | -2.70666087 | 7.47E-26 | POU6F2   | 1.26269  | 0.030923 |
| DNASE1L3    | -2.70131153 | 1.41E-30 | DISP2    | 1.262978 | 0.005523 |
| MYOZ2       | -2.70076771 | 1.45E-11 | ACOT7    | 1.264261 | 8.82E-14 |
| LMOD1       | -2.69816781 | 3.89E-40 | SKA3     | 1.264625 | 5.87E-12 |
| ANGPTL7     | -2.69666926 | 6.69E-21 | CBX2     | 1.265678 | 3.30E-07 |
| C10orf107   | -2.69566754 | 1.78E-17 | AMH      | 1.266376 | 0.019901 |
| CRACR2B     | -2.69372571 | 7.85E-35 | HOXA13   | 1.267501 | 0.007197 |
| KRTAP10-9   | -2.69038518 | 6.77E-16 | ADAMTSL2 | 1.269244 | 4.83E-05 |
| SMPX        | -2.68980718 | 1.59E-10 | TPST1    | 1.269581 | 4.54E-11 |
| CRYAB       | -2.68972927 | 2.60E-30 | EGFR     | 1.270414 | 1.52E-06 |
| FAM81B      | -2.68483247 | 3.48E-15 | RTTN     | 1.270447 | 2.29E-06 |
| FOXJ1       | -2.68358164 | 8.73E-10 | STIL     | 1.270924 | 2.80E-08 |
| GLYATL2     | -2.68292238 | 5.97E-13 | MXRA5    | 1.270991 | 1.29E-05 |
| NOS2        | -2.6825805  | 9.44E-17 | LETM2    | 1.274237 | 0.000577 |
| TRPV6       | -2.68032361 | 6.83E-20 | NEMP1    | 1.274579 | 3.29E-12 |
| VSIG8       | -2.67941055 | 6.79E-13 | RASD2    | 1.27572  | 0.000325 |
| KRTAP26-1   | -2.67778204 | 2.13E-15 | IL4I1    | 1.276152 | 4.27E-06 |
| PRR15L      | -2.67618993 | 6.92E-26 | KNTC1    | 1.278369 | 7.68E-08 |
| MYRIP       | -2.67576282 | 7.48E-20 | BMPR1B   | 1.278485 | 0.000115 |
| GALNT16     | -2.67561738 | 5.75E-22 | HOXD8    | 1.278654 | 2.63E-06 |
| DUSP27      | -2.66040689 | 5.94E-14 | LEMD1    | 1.278687 | 0.000606 |
| PRKAA2      | -2.65932277 | 3.18E-23 | PCSK1N   | 1.279526 | 0.009365 |
| RRAGD       | -2.64478701 | 6.96E-66 | S1PR5    | 1.280868 | 1.89E-11 |
| CHAD        | -2.64163709 | 1.42E-19 | EPO      | 1.281666 | 0.003137 |
| RHCG        | -2.64000337 | 2.94E-18 | PSMC3IP  | 1.282373 | 3.70E-07 |
| XXbac-BPG32 | -2.63997992 | 4.55E-16 | FGFR4    | 1.282761 | 0.000352 |
| TRIM55      | -2.63950179 | 1.54E-20 | KPNA2    | 1.282782 | 7.68E-22 |
| CEACAM7     | -2.63267233 | 1.07E-12 | C17orf53 | 1.283242 | 1.37E-08 |
| CAPN6       | -2.63262206 | 3.60E-17 | NUSAP1   | 1.286684 | 2.24E-13 |
| KRTAP16-1   | -2.63125831 | 2.21E-15 | NMB      | 1.28675  | 8.86E-07 |
| MYADML2     | -2.62774642 | 5.75E-16 | GOLGA7B  | 1.287236 | 4.46E-06 |
| ELF5        | -2.62657995 | 1.11E-18 | PYGL     | 1.287411 | 3.66E-10 |
| DDIT4L      | -2.62402357 | 2.16E-15 | MYO3B    | 1.287549 | 0.001252 |
| GNG7        | -2.62305047 | 5.85E-35 | HES2     | 1.287939 | 7.48E-08 |
| ALOX12      | -2.61859214 | 1.30E-21 | ITPR3    | 1.289139 | 4.53E-14 |
| C2orf54     | -2.6184004  | 5.83E-28 | PRC1     | 1.289861 | 3.68E-16 |
| DRC1        | -2.61423133 | 1.78E-15 | STARD4   | 1.290916 | 8.60E-10 |
| LAMB4       | -2.60966149 | 1.57E-20 | ZFP92    | 1.290916 | 0.007468 |
| EMP1        | -2.60482532 | 1.25E-59 | GPC2     | 1.290944 | 0.006989 |

|           |             |          |          |          |          |
|-----------|-------------|----------|----------|----------|----------|
| POPDC2    | -2.60481308 | 3.81E-28 | LBX2     | 1.291698 | 0.013674 |
| KRTAP4-3  | -2.60192556 | 1.13E-14 | ZBTB32   | 1.291786 | 0.003235 |
| PLPP7     | -2.60092501 | 4.13E-28 | ADAMTS6  | 1.291916 | 0.014007 |
| HBA1      | -2.59840336 | 2.78E-14 | WDR54    | 1.292365 | 1.33E-10 |
| UCP3      | -2.59641689 | 1.99E-20 | LRRC8C   | 1.29257  | 7.70E-09 |
| KRTAP10-7 | -2.59620132 | 7.40E-15 | WNT10A   | 1.293046 | 1.21E-05 |
| RBFox1    | -2.59578987 | 1.17E-17 | MMP17    | 1.293403 | 7.10E-07 |
| SNX31     | -2.59113551 | 1.32E-19 | SLC28A3  | 1.295492 | 1.94E-06 |
| KCNJ16    | -2.5909593  | 4.11E-16 | PTX4     | 1.295775 | 0.047136 |
| SORBS1    | -2.58599395 | 5.45E-38 | CASC5    | 1.296307 | 2.66E-07 |
| NIPSNAP3B | -2.58538751 | 3.10E-26 | MTHFD1L  | 1.296742 | 4.36E-15 |
| GPX3      | -2.58102218 | 1.97E-34 | METTL11B | 1.297075 | 0.005985 |
| TNXB      | -2.57873612 | 6.98E-25 | UBE2L6   | 1.298042 | 1.32E-10 |
| DNAI2     | -2.57752417 | 9.41E-15 | ZNF541   | 1.298197 | 0.048434 |
| SORBS2    | -2.57319746 | 1.74E-32 | CHRNA9   | 1.298855 | 0.011515 |
| SBK3      | -2.57012987 | 8.79E-17 | CLEC12A  | 1.29897  | 0.000972 |
| HP        | -2.56800017 | 1.62E-16 | NLGN4X   | 1.299755 | 0.006706 |
| PPP1R27   | -2.56458163 | 1.36E-11 | FABP6    | 1.301188 | 0.00055  |
| KRTAP17-1 | -2.56334254 | 6.63E-14 | GPX8     | 1.302219 | 5.11E-10 |
| HPGD      | -2.56312875 | 8.62E-24 | ELF4     | 1.303655 | 2.48E-17 |
| TNNI1     | -2.56207602 | 7.66E-13 | RECQL4   | 1.303658 | 4.63E-10 |
| KLHL31    | -2.56039865 | 5.67E-21 | TRPV3    | 1.304353 | 0.000112 |
| HSPB7     | -2.55920261 | 1.50E-10 | KISS1    | 1.305975 | 0.03379  |
| SYNM      | -2.55920091 | 4.83E-33 | NPSR1    | 1.306281 | 0.031049 |
| MFSD6L    | -2.5525223  | 8.73E-23 | SLC26A6  | 1.306761 | 1.84E-09 |
| TFF3      | -2.5505481  | 8.61E-09 | C2CD4C   | 1.307782 | 0.001642 |
| FAM180B   | -2.54906048 | 1.19E-18 | PSORS1C1 | 1.308123 | 0.000425 |
| CACNG6    | -2.54886326 | 1.44E-15 | TMSB15A  | 1.309269 | 0.00541  |
| PSCA      | -2.54580449 | 1.17E-15 | HOXA7    | 1.309556 | 0.005351 |
| MYO18B    | -2.54536147 | 3.09E-15 | MRGBP    | 1.309766 | 1.02E-18 |
| HOPX      | -2.54272354 | 1.88E-27 | NDRG1    | 1.311787 | 2.66E-08 |
| PLCB4     | -2.5404624  | 5.16E-24 | NREP     | 1.311851 | 7.11E-10 |
| HSD11B2   | -2.53075062 | 1.03E-46 | MAD2L1   | 1.312634 | 3.66E-11 |
| RGN       | -2.52767238 | 2.38E-20 | CHTF18   | 1.312881 | 1.42E-10 |
| PRB2      | -2.52621931 | 1.91E-09 | SLAMF8   | 1.313234 | 1.30E-07 |
| AKAP14    | -2.52356277 | 1.50E-13 | FOXP3    | 1.313278 | 4.57E-07 |
| ENPP4     | -2.52290896 | 5.91E-34 | SAMD9L   | 1.313959 | 3.27E-07 |
| PACRG     | -2.51647122 | 1.87E-16 | PTCHD2   | 1.315909 | 0.026504 |
| SLURP1    | -2.50665318 | 9.71E-12 | RIMS2    | 1.316216 | 0.005523 |
| ESRRG     | -2.50187664 | 5.34E-17 | DLL3     | 1.317056 | 0.01562  |
| FLNC      | -2.50150388 | 1.76E-16 | SPON2    | 1.318401 | 1.85E-08 |
| SPTB      | -2.50079331 | 1.23E-14 | ARPC1B   | 1.319569 | 1.51E-17 |
| KBTBD12   | -2.50048473 | 5.26E-15 | CXCL14   | 1.320547 | 0.00021  |
| FOX11     | -2.49989023 | 1.28E-12 | NKX3-2   | 1.320669 | 0.01568  |
| AGR2      | -2.49507444 | 1.14E-16 | CCNF     | 1.320886 | 1.13E-14 |
| RBM24     | -2.49145848 | 7.53E-17 | FEN1     | 1.322324 | 6.53E-19 |
| VGLL2     | -2.49086356 | 2.36E-17 | C19orf84 | 1.322997 | 0.009456 |

|           |             |          |           |          |          |
|-----------|-------------|----------|-----------|----------|----------|
| ARFGEF3   | -2.48508119 | 3.65E-22 | BORA      | 1.323127 | 7.78E-08 |
| UPK3A     | -2.48355738 | 4.35E-16 | HIST1H4E  | 1.323496 | 0.000483 |
| TMEM56    | -2.4791125  | 1.21E-24 | CDK6      | 1.323769 | 4.54E-10 |
| FIGF      | -2.47470697 | 2.63E-18 | NCF2      | 1.32445  | 8.00E-12 |
| GDF5      | -2.47463821 | 1.45E-15 | DSCC1     | 1.326285 | 2.72E-10 |
| LRRC30    | -2.47428647 | 7.63E-14 | RAB31     | 1.326401 | 1.73E-15 |
| CNTFR     | -2.47357758 | 1.54E-19 | PLXNA1    | 1.326502 | 6.87E-21 |
| ALOX15    | -2.46915885 | 1.37E-10 | ERCC6L    | 1.326774 | 7.36E-07 |
| NWD1      | -2.46653613 | 5.11E-16 | NOTUM     | 1.327527 | 0.001793 |
| GYS2      | -2.46619373 | 9.55E-15 | YEATS2    | 1.32782  | 1.60E-15 |
| CFAP77    | -2.46520255 | 1.80E-13 | MISP      | 1.329259 | 3.77E-05 |
| KRTAP4-5  | -2.46477088 | 3.82E-14 | JPH3      | 1.329896 | 0.020987 |
| CFD       | -2.46454887 | 8.25E-40 | CLEC7A    | 1.331244 | 1.60E-07 |
| ABCA8     | -2.46202142 | 1.86E-21 | ARHGAP11  | 1.332782 | 4.94E-14 |
| CAMK2B    | -2.45615238 | 2.84E-18 | C6orf10   | 1.333728 | 0.003916 |
| VWA3B     | -2.45349666 | 5.35E-14 | IL2RA     | 1.334488 | 1.72E-06 |
| LPL       | -2.45221797 | 2.13E-26 | SPC25     | 1.335207 | 4.21E-12 |
| SAMD5     | -2.45143325 | 2.56E-26 | KANK4     | 1.336064 | 0.001062 |
| CARNS1    | -2.45052406 | 1.63E-21 | OSM       | 1.336539 | 0.000566 |
| CLDN17    | -2.45039522 | 5.39E-11 | CDCA4     | 1.337654 | 3.52E-21 |
| FXD2      | -2.45022545 | 4.51E-09 | TNFRSF9   | 1.338678 | 0.000125 |
| CCDC60    | -2.45006497 | 1.58E-14 | HIST1H2AJ | 1.339436 | 0.00618  |
| DPT       | -2.44865811 | 1.66E-25 | HLA-F     | 1.33982  | 7.19E-09 |
| CLDN8     | -2.44497384 | 1.46E-11 | TMEM158   | 1.340263 | 8.26E-07 |
| ITM2A     | -2.44388439 | 1.90E-51 | FAT1      | 1.340916 | 8.23E-09 |
| PERM1     | -2.44150377 | 2.42E-44 | HIST1H2AN | 1.34107  | 0.001293 |
| NME5      | -2.4412461  | 2.04E-14 | ADAM23    | 1.341317 | 0.000251 |
| TMPRSS2   | -2.44107657 | 2.68E-17 | ATP8B3    | 1.342043 | 0.001748 |
| PPP1R9A   | -2.43977165 | 1.30E-17 | HIST1H4K  | 1.342061 | 0.002397 |
| C4orf19   | -2.43861639 | 9.33E-20 | LAIR2     | 1.342546 | 0.002514 |
| CRAT      | -2.43637202 | 3.13E-38 | PTGFRN    | 1.343753 | 5.93E-18 |
| COBL      | -2.43573559 | 2.64E-36 | MYO10     | 1.346883 | 4.03E-14 |
| UPK1A     | -2.43535295 | 1.55E-10 | NOX4      | 1.349714 | 0.000291 |
| TBX15     | -2.43412608 | 3.74E-25 | CDC25B    | 1.351236 | 9.10E-14 |
| ANKRD23   | -2.43328875 | 3.14E-19 | PANX2     | 1.353495 | 0.000179 |
| C6orf118  | -2.43320198 | 7.90E-13 | LAMB1     | 1.353821 | 4.96E-14 |
| SCNN1B    | -2.430209   | 1.21E-24 | GATA4     | 1.354338 | 0.028748 |
| MLIP      | -2.42829187 | 5.82E-23 | FANCI     | 1.355261 | 1.23E-15 |
| GBP6      | -2.422079   | 3.28E-26 | B4GALNT2  | 1.355272 | 0.009026 |
| YIPF7     | -2.42189017 | 1.43E-14 | TMEM88B   | 1.357715 | 0.008492 |
| CFAP43    | -2.41863089 | 2.15E-13 | PAGE1     | 1.357747 | 0.048151 |
| PAX9      | -2.40993868 | 2.07E-32 | TOR4A     | 1.357852 | 5.38E-08 |
| LDHD      | -2.40993752 | 2.59E-43 | HTRA3     | 1.358545 | 2.79E-06 |
| RARRES1   | -2.40572355 | 2.68E-21 | SPINK1    | 1.361907 | 0.009106 |
| PTGDS     | -2.40330096 | 2.57E-28 | OIP5      | 1.362627 | 7.90E-10 |
| IL17D     | -2.40318574 | 1.22E-19 | GSG2      | 1.363825 | 4.27E-07 |
| KRTAP10-1 | -2.39770681 | 1.70E-13 | IFNL1     | 1.364856 | 0.008238 |

|            |             |          |          |          |          |
|------------|-------------|----------|----------|----------|----------|
| CAPS       | -2.38369696 | 3.99E-25 | IER5L    | 1.36499  | 2.96E-10 |
| SCIN       | -2.38340851 | 5.71E-21 | GALNT6   | 1.365336 | 3.12E-07 |
| TJP3       | -2.38261204 | 1.40E-21 | ADD2     | 1.366171 | 0.015338 |
| MLPH       | -2.3824627  | 2.51E-21 | B3GNT4   | 1.370624 | 0.000267 |
| KCNA7      | -2.37777907 | 8.30E-15 | KIAA0101 | 1.372335 | 1.41E-12 |
| ACER1      | -2.37776054 | 1.32E-13 | AC105009 | 1.373469 | 0.002028 |
| SPRR2F     | -2.37697844 | 5.56E-10 | C11orf84 | 1.377961 | 2.08E-16 |
| SGK2       | -2.37664232 | 2.38E-13 | PRAC2    | 1.379423 | 0.029603 |
| SLC6A1     | -2.37395193 | 3.87E-18 | CGB5     | 1.379615 | 0.006211 |
| MYH15      | -2.37243056 | 3.98E-13 | ZBP1     | 1.384706 | 8.84E-05 |
| ADHFE1     | -2.36997032 | 1.48E-25 | OLFML2B  | 1.384968 | 3.83E-07 |
| DNALI1     | -2.36966997 | 2.72E-20 | TACC3    | 1.385586 | 1.18E-16 |
| PLA2G2A    | -2.36639036 | 1.45E-08 | LRFN4    | 1.385683 | 1.81E-11 |
| OSR1       | -2.36471907 | 3.61E-23 | KRT17    | 1.386942 | 1.17E-06 |
| HLF        | -2.36442402 | 1.04E-24 | MND1     | 1.388649 | 5.22E-09 |
| ANK1       | -2.36306437 | 4.44E-21 | GNA12    | 1.389397 | 6.21E-23 |
| SAA2-SAA4  | -2.36162346 | 6.35E-16 | TTK      | 1.391683 | 2.52E-13 |
| PRR32      | -2.36152184 | 2.37E-14 | SEC61G   | 1.391973 | 3.32E-07 |
| CTNNA3     | -2.35771386 | 3.61E-14 | MTBP     | 1.39225  | 5.50E-05 |
| DNAH9      | -2.35691262 | 1.41E-12 | CDK1     | 1.392581 | 3.43E-16 |
| PHYH       | -2.35616911 | 6.97E-50 | DEPDC1   | 1.394551 | 5.94E-10 |
| CCDC170    | -2.35269511 | 4.06E-15 | MARVELD1 | 1.397862 | 3.79E-17 |
| NPY1R      | -2.34981688 | 1.18E-14 | ASPM     | 1.398034 | 1.42E-11 |
| ART3       | -2.3476693  | 9.04E-15 | BGN      | 1.398087 | 6.78E-08 |
| SLC4A4     | -2.34556795 | 8.65E-15 | KRT75    | 1.398557 | 0.003118 |
| FAM189A2   | -2.34255189 | 2.60E-25 | FAM132B  | 1.400055 | 0.000525 |
| ACOX2      | -2.3382316  | 8.09E-22 | NKX2-2   | 1.400926 | 0.005767 |
| TOX3       | -2.33615005 | 4.68E-14 | PLOD1    | 1.401171 | 1.01E-17 |
| TLX1       | -2.33307619 | 5.86E-11 | CDX1     | 1.401807 | 0.005516 |
| CA8        | -2.33145175 | 1.00E-13 | CLEC11A  | 1.402234 | 1.87E-07 |
| SPINK8     | -2.32372179 | 2.22E-13 | HIST1H3B | 1.402405 | 0.004463 |
| KRTAP10-12 | -2.32316717 | 1.21E-10 | CDCA2    | 1.402812 | 5.75E-11 |
| PRSS27     | -2.32234918 | 2.11E-17 | TMEM200f | 1.403195 | 3.04E-08 |
| JCHAIN     | -2.32109892 | 1.09E-13 | CCNA2    | 1.404933 | 1.87E-16 |
| BMP3       | -2.32084343 | 4.66E-10 | ARSJ     | 1.406195 | 1.52E-08 |
| KIT        | -2.3167807  | 7.52E-31 | TYMP     | 1.406384 | 4.46E-10 |
| CAMK2A     | -2.31458586 | 4.28E-19 | CKS2     | 1.407779 | 5.27E-13 |
| NOSTRIN    | -2.31307654 | 1.25E-21 | PSRC1    | 1.41009  | 3.72E-12 |
| KCNJ11     | -2.31089445 | 8.45E-20 | ROS1     | 1.410242 | 0.007924 |
| B3GNT6     | -2.30871113 | 2.00E-14 | STAG3    | 1.410835 | 0.009771 |
| STAC2      | -2.30870144 | 8.87E-09 | HIST1H1E | 1.412526 | 0.000234 |
| TMEM132C   | -2.30812517 | 3.77E-14 | PHF24    | 1.417848 | 0.000865 |
| CACNG1     | -2.30342817 | 4.22E-10 | C12orf75 | 1.418437 | 6.05E-10 |
| CAP2       | -2.30194551 | 3.92E-33 | CCNB1    | 1.418997 | 2.34E-16 |
| TMEM182    | -2.3017993  | 1.48E-29 | STON2    | 1.419348 | 2.29E-13 |
| ERBB4      | -2.29925007 | 5.60E-14 | POLQ     | 1.419754 | 7.69E-06 |
| MLANA      | -2.29861164 | 1.36E-14 | TAP1     | 1.420738 | 6.60E-11 |

|           |             |          |           |          |          |
|-----------|-------------|----------|-----------|----------|----------|
| ARMC3     | -2.2945741  | 8.15E-12 | KLK14     | 1.420944 | 0.014098 |
| CDHR3     | -2.29284705 | 1.33E-14 | SLC52A1   | 1.420979 | 7.96E-06 |
| TEKT2     | -2.291845   | 1.94E-13 | ADAM19    | 1.422315 | 2.33E-07 |
| KRTAP10-2 | -2.29148577 | 3.71E-12 | MCM10     | 1.423246 | 3.54E-10 |
| ACACB     | -2.29089341 | 7.36E-27 | PRELID3A  | 1.424674 | 8.42E-05 |
| ANKRD2    | -2.28864371 | 7.85E-14 | SORCS2    | 1.425734 | 6.60E-07 |
| SEC14L5   | -2.28697602 | 6.53E-15 | EFNB1     | 1.426887 | 1.21E-17 |
| GPR12     | -2.28689979 | 4.30E-13 | SLC17A9   | 1.429061 | 0.000115 |
| ANK2      | -2.28656264 | 2.26E-20 | WDHD1     | 1.430856 | 8.63E-14 |
| C2orf88   | -2.28551772 | 4.22E-19 | AC009060. | 1.430964 | 0.001818 |
| CILP      | -2.28447716 | 1.60E-13 | TMC7      | 1.432766 | 2.47E-05 |
| PDE4DIP   | -2.28276324 | 1.35E-29 | CHST7     | 1.433897 | 3.45E-07 |
| KRT40     | -2.28052756 | 7.49E-13 | SCN9A     | 1.434223 | 0.005981 |
| GRB14     | -2.27969804 | 9.38E-18 | XCL1      | 1.434428 | 2.11E-05 |
| KRTAP19-5 | -2.27714602 | 1.29E-10 | PPFIA1    | 1.436079 | 2.24E-07 |
| TGFBR3    | -2.27384061 | 3.89E-37 | GBP1      | 1.437757 | 9.12E-07 |
| MYH7B     | -2.27001119 | 1.95E-15 | NECAB2    | 1.438097 | 0.009826 |
| MT3       | -2.26568318 | 1.61E-12 | UCHL1     | 1.440274 | 0.000996 |
| CFAP52    | -2.26367834 | 7.06E-12 | PCDH7     | 1.440291 | 4.08E-07 |
| IL19      | -2.2635436  | 1.50E-12 | SPIB      | 1.44101  | 0.019095 |
| SEMA6C    | -2.26132176 | 6.16E-24 | GPR153    | 1.44135  | 5.05E-12 |
| SMIM5     | -2.26001326 | 9.40E-30 | RAG1      | 1.441624 | 0.000806 |
| CEACAM1   | -2.25953769 | 7.58E-29 | FLRT2     | 1.442582 | 5.86E-06 |
| SLC36A2   | -2.25726388 | 4.11E-12 | TMEM92    | 1.443398 | 3.42E-07 |
| FGF10     | -2.25721674 | 1.48E-14 | CACNA1B   | 1.443471 | 0.006348 |
| GNA14     | -2.25488428 | 3.13E-20 | DCBLD2    | 1.445209 | 1.19E-09 |
| CCL14     | -2.25465498 | 1.22E-14 | HK3       | 1.44541  | 2.81E-05 |
| CCDC17    | -2.25223335 | 2.20E-15 | BEST2     | 1.446589 | 0.016325 |
| DKK4      | -2.25064574 | 2.20E-16 | MKI67     | 1.446634 | 6.60E-16 |
| BPIFB3    | -2.25032113 | 9.53E-11 | AC243945. | 1.446841 | 0.003758 |
| PDLIM3    | -2.24836285 | 7.16E-14 | MIOX      | 1.447    | 0.017689 |
| JPH2      | -2.24804969 | 1.59E-19 | NAGS      | 1.448574 | 2.14E-08 |
| NBEA      | -2.2468451  | 5.97E-16 | EXT1      | 1.44888  | 5.81E-22 |
| RNF150    | -2.23844798 | 2.94E-17 | OCIAD2    | 1.44901  | 4.54E-15 |
| GCNT3     | -2.23817088 | 9.54E-18 | CA2       | 1.451077 | 7.19E-06 |
| CTTNBP2   | -2.23802133 | 1.90E-20 | CTLA4     | 1.451713 | 3.48E-07 |
| TRIM72    | -2.23745197 | 3.04E-12 | HMX1      | 1.452777 | 0.012495 |
| SLC26A9   | -2.23657368 | 1.26E-15 | CDH2      | 1.453884 | 0.001554 |
| SCARA5    | -2.23509298 | 8.90E-23 | GINS1     | 1.455577 | 6.18E-15 |
| MYZAP     | -2.23480827 | 9.12E-31 | UBE2T     | 1.45661  | 7.26E-15 |
| HSPB2     | -2.23454553 | 2.53E-19 | KIFC1     | 1.456802 | 1.33E-18 |
| C6        | -2.23407522 | 4.50E-13 | RCN3      | 1.457013 | 6.73E-07 |
| CFAP73    | -2.23111618 | 3.36E-13 | SLC16A1   | 1.457722 | 1.13E-14 |
| METTL7A   | -2.23007216 | 5.43E-36 | CKS1B     | 1.457949 | 1.25E-15 |
| MYOM3     | -2.22902252 | 1.84E-18 | P4HA2     | 1.458696 | 4.14E-15 |
| ERN2      | -2.22843476 | 9.53E-11 | STAT1     | 1.461126 | 4.64E-11 |
| ADSSL1    | -2.22780073 | 2.05E-29 | AEBP1     | 1.461399 | 2.90E-07 |



|           |             |          |           |          |          |
|-----------|-------------|----------|-----------|----------|----------|
| MMRN1     | -2.22692116 | 1.96E-19 | CHN1      | 1.464946 | 3.20E-08 |
| MT1M      | -2.22469489 | 5.56E-21 | TNFRSF12A | 1.465021 | 2.79E-13 |
| ARPP21    | -2.22367463 | 4.59E-12 | TNFRSF4   | 1.46562  | 3.18E-06 |
| SCEL      | -2.22105765 | 5.34E-17 | SKA1      | 1.465903 | 2.44E-12 |
| MURC      | -2.21761053 | 1.94E-11 | GNG8      | 1.466582 | 0.001353 |
| PCP4      | -2.21675533 | 1.10E-11 | LGALS1    | 1.468547 | 1.24E-09 |
| ASPA      | -2.21586443 | 2.98E-13 | COLGALT1  | 1.469998 | 3.97E-36 |
| AGFG2     | -2.21092092 | 3.39E-56 | KDELC1    | 1.470414 | 1.89E-12 |
| ALDH1A1   | -2.21070988 | 8.98E-13 | P4HA1     | 1.470756 | 2.45E-15 |
| CLDN3     | -2.20423181 | 4.58E-06 | FCGR3A    | 1.470839 | 5.71E-07 |
| KRTAP4-11 | -2.20414333 | 3.37E-11 | CENPE     | 1.471315 | 5.95E-10 |
| SPINK7    | -2.20293682 | 3.54E-07 | CDH3      | 1.471991 | 7.42E-13 |
| RCAN2     | -2.20241934 | 9.02E-29 | SOST      | 1.473453 | 0.005281 |
| GAMT      | -2.19986104 | 1.60E-29 | ARSI      | 1.474175 | 9.53E-08 |
| EFHB      | -2.19905855 | 5.31E-11 | SOCS1     | 1.474319 | 2.43E-11 |
| CMA1      | -2.19432544 | 6.11E-16 | CPNE7     | 1.475445 | 0.000168 |
| ACTG2     | -2.19301234 | 5.55E-16 | SDK2      | 1.476545 | 5.83E-08 |
| LRRN4CL   | -2.19294368 | 4.48E-24 | GIN52     | 1.477741 | 2.05E-12 |
| SERPINB11 | -2.19164521 | 1.31E-09 | ITGB6     | 1.478729 | 3.35E-08 |
| PEG3      | -2.18951177 | 4.34E-13 | IFITM1    | 1.48288  | 2.18E-09 |
| DTNA      | -2.18947847 | 3.71E-17 | CDH24     | 1.484448 | 9.25E-13 |
| MUC15     | -2.18896937 | 9.39E-20 | CDT1      | 1.485013 | 6.66E-15 |
| ALPK3     | -2.18710445 | 1.50E-17 | HMGB3     | 1.485332 | 5.54E-16 |
| SCN1B     | -2.18461406 | 5.95E-20 | FSD1      | 1.485418 | 0.00652  |
| MYLK4     | -2.18416376 | 1.35E-16 | CTSC      | 1.485529 | 2.76E-13 |
| PGM5      | -2.1840551  | 3.22E-20 | AMDHD1    | 1.485648 | 0.010071 |
| ENPP5     | -2.1808156  | 2.27E-17 | TRAM2     | 1.489425 | 1.69E-16 |
| GADD45G   | -2.17959246 | 2.55E-26 | C11orf87  | 1.489506 | 0.015672 |
| KRT82     | -2.17737646 | 2.00E-10 | BUB1B     | 1.490216 | 7.62E-16 |
| PPARG     | -2.17288654 | 1.79E-24 | HOXC13    | 1.490669 | 1.45E-10 |
| CRTAC1    | -2.16983621 | 1.57E-14 | RTN4R     | 1.490872 | 2.30E-09 |
| CLDN11    | -2.16890398 | 2.15E-16 | C10orf55  | 1.491991 | 5.81E-06 |
| CDHR4     | -2.16673104 | 1.09E-10 | ORC1      | 1.492169 | 6.70E-14 |
| PFKM      | -2.16460581 | 2.60E-48 | SOX1      | 1.492309 | 0.001777 |
| LGALS12   | -2.16398937 | 8.16E-11 | HIST1H3C  | 1.493145 | 0.00263  |
| KRTAP10-8 | -2.16284694 | 3.34E-11 | AC104650  | 1.493207 | 0.00023  |
| AMY2B     | -2.15831551 | 1.57E-12 | GJB7      | 1.49335  | 0.001046 |
| ITGB1BP2  | -2.15828416 | 5.09E-17 | SPRY4     | 1.494028 | 1.28E-13 |
| SRPK3     | -2.15815097 | 9.06E-16 | HIST1H4H  | 1.497232 | 6.58E-07 |
| COQ10A    | -2.15785768 | 5.05E-34 | TEX29     | 1.497281 | 0.00044  |
| KLHDC7A   | -2.15648919 | 1.14E-11 | PGF       | 1.498608 | 3.67E-08 |
| BARX2     | -2.15577723 | 1.89E-32 | TONSL     | 1.499892 | 1.97E-13 |
| ALB       | -2.15504026 | 4.44E-05 | NEFH      | 1.502632 | 0.02093  |
| TTC25     | -2.15499151 | 2.98E-13 | SPOCK1    | 1.503099 | 1.84E-05 |
| MAP1LC3C  | -2.15452895 | 2.55E-14 | CENPF     | 1.504691 | 3.35E-16 |
| TSPAN12   | -2.15451808 | 2.96E-25 | PARP14    | 1.506572 | 2.30E-16 |
| KRTAP12-3 | -2.14886389 | 6.93E-11 | NCAPG     | 1.507328 | 1.32E-16 |

|            |             |          |           |          |          |
|------------|-------------|----------|-----------|----------|----------|
| GLRB       | -2.14755504 | 6.83E-16 | TMEM52B   | 1.507362 | 0.004655 |
| ACHE       | -2.14643685 | 3.59E-15 | KLK5      | 1.508294 | 0.000742 |
| BEST3      | -2.1439149  | 1.85E-11 | C4orf48   | 1.509727 | 6.75E-07 |
| GFRA1      | -2.14279956 | 2.76E-18 | LAMP3     | 1.510648 | 4.90E-09 |
| CYP3A4     | -2.14015073 | 2.79E-12 | SOX11     | 1.512588 | 0.004285 |
| SLC26A4    | -2.1384504  | 1.50E-10 | RTP4      | 1.512643 | 1.72E-08 |
| MAOB       | -2.13735966 | 1.09E-15 | LRAT      | 1.514343 | 0.00253  |
| TMEM211    | -2.1360314  | 1.00E-10 | HELZ2     | 1.517557 | 1.54E-13 |
| SPATA18    | -2.13451894 | 2.81E-30 | TUBB3     | 1.517588 | 1.82E-07 |
| FAXDC2     | -2.13446989 | 1.37E-25 | CCNE1     | 1.518346 | 2.98E-10 |
| LIMCH1     | -2.13347922 | 1.69E-24 | TNFRSF18  | 1.518832 | 1.56E-06 |
| FADS2      | -2.12945906 | 1.62E-19 | RAB3B     | 1.519001 | 0.003376 |
| TFAP2B     | -2.12768144 | 5.35E-09 | ULBP1     | 1.519177 | 0.0021   |
| KLHDC8A    | -2.12722793 | 4.55E-11 | PLA2G7    | 1.519415 | 4.64E-09 |
| IL17F      | -2.12654424 | 5.22E-11 | RAD51     | 1.522389 | 2.53E-15 |
| VIT        | -2.12407401 | 3.46E-17 | AC007163  | 1.522617 | 0.002756 |
| MSMB       | -2.12289859 | 8.87E-07 | ITGB4     | 1.523302 | 3.58E-16 |
| GMPR       | -2.12086904 | 9.59E-27 | P3H4      | 1.52428  | 2.61E-12 |
| GPIHBP1    | -2.11465523 | 9.32E-16 | GPNMB     | 1.526078 | 6.41E-09 |
| ASB2       | -2.11428511 | 3.25E-26 | TOP2A     | 1.52761  | 1.13E-17 |
| AC087651.1 | -2.11326792 | 3.09E-11 | ASF1B     | 1.528328 | 2.78E-16 |
| SYNPO2     | -2.11012472 | 7.14E-11 | FABP4     | 1.529572 | 0.023781 |
| MIA        | -2.11010728 | 5.68E-09 | ODC1      | 1.530782 | 9.75E-07 |
| NOS1       | -2.10962548 | 2.08E-17 | ORAOV1    | 1.532789 | 2.52E-06 |
| AOX1       | -2.1094234  | 6.47E-24 | QRFPR     | 1.532842 | 0.017685 |
| ATP13A4    | -2.10882655 | 1.91E-14 | MX1       | 1.533202 | 3.84E-08 |
| AGT        | -2.10880949 | 2.59E-15 | RCOR2     | 1.533305 | 0.000121 |
| UGT2B28    | -2.09976305 | 3.10E-10 | OR2B6     | 1.535184 | 0.005556 |
| CDNF       | -2.09919961 | 3.07E-20 | COL17A1   | 1.535242 | 1.44E-07 |
| ASB5       | -2.08827641 | 3.07E-08 | HIST1H2BC | 1.543754 | 1.39E-11 |
| PLP1       | -2.08783963 | 1.04E-12 | CEBPE     | 1.54491  | 0.001932 |
| INMT       | -2.08751236 | 7.69E-23 | COL13A1   | 1.54522  | 5.26E-06 |
| JSRP1      | -2.08585874 | 1.79E-14 | DLX1      | 1.546452 | 3.80E-06 |
| C4B        | -2.08440651 | 9.78E-15 | IFIH1     | 1.54657  | 1.36E-10 |
| C11orf88   | -2.08376174 | 6.53E-10 | RMI2      | 1.547115 | 1.46E-12 |
| C1orf87    | -2.08168823 | 5.47E-11 | XRCC2     | 1.548837 | 1.40E-06 |
| PTX3       | -2.08008387 | 9.47E-13 | NEIL3     | 1.549852 | 2.76E-08 |
| PARK2      | -2.07290342 | 2.02E-15 | CT45A1    | 1.551029 | 0.040467 |
| RSPO3      | -2.07078549 | 1.56E-17 | ADA       | 1.55111  | 5.12E-13 |
| TMEM61     | -2.06752306 | 3.97E-18 | MMP14     | 1.553361 | 1.74E-22 |
| ASB16      | -2.06468433 | 1.24E-15 | SYNDIG1   | 1.554201 | 0.000727 |
| HID1       | -2.06423509 | 2.59E-22 | PAGE2B    | 1.556826 | 0.044885 |
| ATP6V1C2   | -2.06027986 | 3.33E-17 | ARHGEF39  | 1.55776  | 6.09E-06 |
| CSRP3      | -2.06000656 | 2.84E-05 | STX1A     | 1.557917 | 1.13E-08 |
| CASC1      | -2.05869897 | 5.08E-10 | ATAD2     | 1.558489 | 3.12E-17 |
| ANKRD66    | -2.0549059  | 3.30E-10 | 1-Dec     | 1.561781 | 0.002488 |
| CYP4F12    | -2.05452902 | 2.49E-15 | FOXF2     | 1.565235 | 2.86E-12 |

|            |             |          |           |          |          |
|------------|-------------|----------|-----------|----------|----------|
| KRT23      | -2.05282351 | 1.62E-14 | BRDT      | 1.567041 | 0.016499 |
| DGAT2      | -2.05268551 | 1.59E-25 | RASL11B   | 1.567045 | 1.02E-05 |
| GATM       | -2.04960406 | 2.93E-31 | HIST1H1D  | 1.567396 | 0.000491 |
| EGF        | -2.04834571 | 8.85E-16 | NCAPH     | 1.568297 | 1.75E-18 |
| CFL2       | -2.04795515 | 8.73E-32 | IFNE      | 1.570123 | 0.000121 |
| DYNLRB2    | -2.0469244  | 3.84E-10 | BNC1      | 1.571241 | 3.58E-13 |
| PTN        | -2.04513547 | 1.04E-14 | OVOS2     | 1.57427  | 0.002513 |
| RASD1      | -2.04480918 | 2.44E-22 | MMP28     | 1.577093 | 2.33E-07 |
| KCNK5      | -2.04467392 | 1.66E-33 | GABRE     | 1.577651 | 3.58E-07 |
| KRT7       | -2.04314623 | 3.79E-08 | CKAP2L    | 1.580823 | 1.19E-14 |
| HBG2       | -2.0426097  | 5.13E-09 | LY6E      | 1.581223 | 8.06E-12 |
| CRCT1      | -2.04248195 | 8.36E-10 | NUF2      | 1.583618 | 1.75E-12 |
| KRTAP5-3   | -2.0412049  | 4.03E-10 | TPBG      | 1.584152 | 9.11E-24 |
| ECT2L      | -2.0399854  | 3.18E-09 | LYPD8     | 1.58579  | 0.002485 |
| ID4        | -2.03992323 | 3.67E-31 | KIF20A    | 1.586076 | 4.38E-18 |
| KRTAP5-5   | -2.03940585 | 1.01E-09 | PSMB9     | 1.588183 | 4.98E-10 |
| PFKFB1     | -2.03496277 | 1.06E-12 | PLOD3     | 1.588436 | 5.64E-19 |
| CHPT1      | -2.03245115 | 1.80E-28 | PRKCDBP   | 1.591366 | 6.44E-12 |
| JPH1       | -2.03235953 | 3.33E-24 | RAD54L    | 1.591731 | 3.41E-13 |
| SPEF1      | -2.03210814 | 2.14E-09 | IQGAP3    | 1.591814 | 2.50E-14 |
| CAPN9      | -2.0299342  | 6.67E-10 | RDH16     | 1.593222 | 6.23E-07 |
| TNMD       | -2.02871181 | 7.51E-12 | SCUBE3    | 1.593989 | 0.005145 |
| ATP13A5    | -2.02605827 | 3.92E-07 | HOXD9     | 1.598862 | 4.06E-10 |
| NUCB2      | -2.02334019 | 1.53E-60 | BASP1     | 1.599024 | 8.42E-11 |
| FAR2       | -2.02289096 | 8.01E-20 | DEPDC1B   | 1.599546 | 1.60E-12 |
| TAC1       | -2.01694418 | 3.86E-10 | BMP8A     | 1.60085  | 0.000398 |
| PPP1R12B   | -2.01644766 | 6.33E-27 | EGFL6     | 1.60165  | 7.47E-08 |
| SHROOM3    | -2.01386363 | 8.78E-38 | PPEF1     | 1.602299 | 0.000913 |
| SFRP1      | -2.01166893 | 2.85E-12 | NKD2      | 1.602795 | 1.04E-07 |
| SRD5A2     | -2.01017269 | 1.76E-09 | COL16A1   | 1.603157 | 1.74E-14 |
| HEPACAM2   | -2.00851716 | 1.10E-09 | FLRT3     | 1.60466  | 1.84E-06 |
| CHDH       | -2.00508746 | 1.09E-12 | KIF3C     | 1.605338 | 6.48E-13 |
| FADS6      | -2.00440863 | 8.43E-13 | P4HA3     | 1.606573 | 1.96E-05 |
| MFAP4      | -2.00131443 | 1.78E-16 | HMMR      | 1.608087 | 3.13E-14 |
| IP6K3      | -1.99935802 | 5.50E-09 | HIST1H2BH | 1.608099 | 1.44E-08 |
| CFAP45     | -1.99557237 | 3.51E-15 | WISP3     | 1.60832  | 0.00013  |
| SLC16A6    | -1.99524462 | 3.17E-23 | WNT7B     | 1.609161 | 3.22E-15 |
| SLC13A5    | -1.99452901 | 2.67E-07 | VCAN      | 1.609734 | 1.25E-06 |
| CFAP65     | -1.99356441 | 8.28E-10 | C1orf186  | 1.610599 | 5.36E-06 |
| TTC29      | -1.99350036 | 6.41E-09 | HAPLN1    | 1.61112  | 0.000835 |
| CAB39L     | -1.99267351 | 1.24E-39 | ALPP      | 1.611309 | 0.001248 |
| KRTAP10-11 | -1.99234531 | 1.74E-09 | TMEM132/  | 1.611442 | 9.47E-18 |
| ENTPD8     | -1.99208911 | 5.40E-10 | PLOD2     | 1.611858 | 2.97E-12 |
| DMD        | -1.99149574 | 7.35E-21 | PARP12    | 1.612475 | 1.07E-20 |
| TMPRSS11A  | -1.98964525 | 3.29E-08 | KIF18A    | 1.613433 | 3.95E-11 |
| FILIP1     | -1.98735773 | 7.99E-16 | APOBEC3B  | 1.614236 | 4.74E-10 |
| AGBL1      | -1.98684908 | 1.66E-07 | SLC7A11   | 1.616381 | 6.82E-05 |

|            |             |          |           |          |          |
|------------|-------------|----------|-----------|----------|----------|
| A2ML1      | -1.98554048 | 1.60E-12 | IL1B      | 1.620034 | 3.08E-06 |
| KRT39      | -1.98472092 | 5.26E-09 | IL7R      | 1.620149 | 4.65E-09 |
| F10        | -1.98407717 | 7.26E-17 | BUB1      | 1.620305 | 1.60E-18 |
| ST6GALNAC1 | -1.98269011 | 3.83E-16 | ECT2      | 1.620836 | 6.11E-19 |
| CXCR2      | -1.98152154 | 4.20E-17 | SHCBP1    | 1.623116 | 9.81E-17 |
| ABI3BP     | -1.98134926 | 4.06E-16 | KIF23     | 1.624237 | 1.03E-19 |
| NR4A1      | -1.97881352 | 2.50E-19 | CENPI     | 1.62521  | 1.45E-08 |
| CYSRT1     | -1.97706644 | 7.55E-13 | UHRF1     | 1.625492 | 4.70E-16 |
| ZNF106     | -1.9757101  | 3.51E-37 | C20orf141 | 1.626173 | 0.000865 |
| TCTEX1D4   | -1.97558246 | 3.81E-09 | EVA1A     | 1.627136 | 3.05E-07 |
| ANKRD1     | -1.97535089 | 1.96E-06 | NPNT      | 1.62829  | 3.69E-10 |
| USP13      | -1.97501953 | 6.19E-26 | COL6A2    | 1.628837 | 3.69E-09 |
| RERG       | -1.97164353 | 6.22E-16 | EIF5A2    | 1.629439 | 4.44E-11 |
| TCEA3      | -1.9712452  | 3.21E-25 | LAMA1     | 1.630743 | 7.43E-05 |
| VIP        | -1.96353923 | 2.11E-09 | CDH11     | 1.631429 | 1.72E-07 |
| MUC16      | -1.960149   | 2.68E-09 | UBE2S     | 1.634411 | 9.61E-15 |
| PAIP2B     | -1.95426642 | 6.06E-33 | HIST1H2AE | 1.635601 | 5.10E-08 |
| FXYD4      | -1.9533544  | 7.55E-10 | HIST1H2BJ | 1.636461 | 1.83E-07 |
| CYP4F8     | -1.94908536 | 2.10E-09 | PTK7      | 1.63717  | 1.15E-27 |
| DNER       | -1.94893465 | 7.62E-12 | HHIPL2    | 1.639225 | 0.009018 |
| CA4        | -1.94720656 | 1.91E-10 | HSD17B6   | 1.639547 | 1.71E-06 |
| CXCL17     | -1.94670546 | 2.90E-11 | SULF2     | 1.639958 | 2.73E-14 |
| SCN2B      | -1.94641632 | 5.04E-12 | GFI1      | 1.64003  | 1.76E-05 |
| ACADL      | -1.9463343  | 1.86E-10 | CERCAM    | 1.642087 | 1.17E-12 |
| TMEM178A   | -1.94180199 | 6.59E-10 | C8G       | 1.646266 | 0.005725 |
| CLCN4      | -1.93862614 | 3.68E-16 | SPAG5     | 1.647525 | 3.28E-18 |
| MUCL1      | -1.93433227 | 1.12E-05 | EPYC      | 1.647784 | 0.009296 |
| ADH4       | -1.93390792 | 5.57E-10 | FKBP10    | 1.650533 | 1.63E-08 |
| CACNB1     | -1.93316825 | 3.75E-15 | CCL11     | 1.653379 | 1.94E-05 |
| CAPN5      | -1.93310556 | 1.06E-30 | RAC2      | 1.655437 | 1.43E-16 |
| SPEG       | -1.9329742  | 8.03E-19 | DLX2      | 1.658296 | 2.41E-05 |
| C1orf115   | -1.93193009 | 4.92E-28 | FADS3     | 1.658812 | 2.75E-09 |
| CHRNA10    | -1.93091201 | 2.80E-13 | CEL       | 1.658816 | 0.009374 |
| B3GALT1    | -1.925744   | 2.21E-09 | HOMER3    | 1.660804 | 1.33E-17 |
| KRTAP9-8   | -1.92001667 | 3.73E-08 | NEK2      | 1.663869 | 4.07E-16 |
| PCP4L1     | -1.91996214 | 5.09E-12 | COX6B2    | 1.66548  | 4.34E-05 |
| SLC16A7    | -1.91833314 | 2.27E-22 | RAD51AP1  | 1.665577 | 9.07E-13 |
| SAXO2      | -1.91421735 | 4.01E-09 | OLFML2A   | 1.665638 | 4.18E-11 |
| PKNOX2     | -1.91384381 | 1.96E-12 | CDCA8     | 1.669384 | 3.62E-22 |
| CORO6      | -1.91170355 | 1.30E-11 | HIST1H2BK | 1.670209 | 4.09E-13 |
| LRRC71     | -1.9108779  | 6.05E-08 | AUNIP     | 1.671549 | 8.11E-12 |
| CDH20      | -1.9099544  | 1.37E-09 | KIAA1549L | 1.671617 | 4.04E-06 |
| EYA2       | -1.90988696 | 3.73E-12 | ARL14     | 1.672235 | 2.71E-05 |
| ATP2A3     | -1.90739463 | 1.64E-29 | HTR1D     | 1.672893 | 0.00048  |
| RERGL      | -1.90602185 | 5.82E-10 | CCNB2     | 1.674349 | 4.73E-22 |
| CLCN1      | -1.90584863 | 4.29E-11 | MB21D1    | 1.674868 | 2.50E-19 |
| KLK13      | -1.90460411 | 7.43E-09 | MX2       | 1.676175 | 6.55E-09 |

|           |             |            |          |          |          |
|-----------|-------------|------------|----------|----------|----------|
| KCNIP2    | -1.90312423 | 1.05E-10   | P3H1     | 1.677374 | 3.30E-16 |
| NNAT      | -1.8991629  | 3.11E-18   | RFC4     | 1.677756 | 1.39E-16 |
| LINGO4    | -1.89644233 | 5.94E-10   | MTFR2    | 1.679431 | 9.32E-12 |
| OGN       | -1.89534174 | 4.65E-09   | FAM133A  | 1.681376 | 0.013012 |
| ZMYND12   | -1.88963351 | 7.19E-10   | RHEBL1   | 1.681819 | 3.51E-08 |
| C15orf62  | -1.88916577 | 9.80E-21   | PHLDB2   | 1.684608 | 7.22E-15 |
| MLXIPL    | -1.88818598 | 4.07E-10   | ORC6     | 1.685478 | 6.40E-12 |
| MITF      | -1.88633804 | 2.08E-20   | NTM      | 1.686986 | 4.75E-07 |
| GGT6      | -1.88587243 | 2.99E-24   | XAGE3    | 1.688584 | 0.044328 |
| NEURL1    | -1.88510189 | 6.20E-12   | ADAMTS7  | 1.689616 | 6.91E-08 |
| BOC       | -1.88267419 | 2.76E-30   | EME1     | 1.690931 | 1.47E-07 |
| PPIL6     | -1.8802616  | 4.02E-10   | CDKN3    | 1.693511 | 5.59E-18 |
| KCNB1     | -1.87900697 | 1.19E-08   | CPA6     | 1.694725 | 3.04E-05 |
| EPDR1     | -1.87382282 | 9.30E-18   | GBX2     | 1.697319 | 0.000466 |
| ACSM3     | -1.87368459 | 1.06E-09   | ANLN     | 1.701134 | 1.19E-17 |
| KRT74     | -1.87320808 | 2.81E-09   | EXO1     | 1.701695 | 6.57E-15 |
| WFDC6     | -1.87292242 | 5.26E-09   | PIF1     | 1.701888 | 3.29E-07 |
| NFIX      | -1.87159905 | 9.99E-48   | PLEKHG4B | 1.703244 | 3.50E-05 |
| FGF7      | -1.86998811 | 8.25E-14   | LTBP1    | 1.704269 | 6.65E-12 |
| NEU4      | -1.86786619 | 1.65E-09   | FAM83A   | 1.706944 | 1.36E-08 |
| CTSG      | -1.86669812 | 1.17E-12   | TGFB1    | 1.707348 | 2.74E-30 |
| LOR       | -1.86659079 | 0.00032813 | SLC38A5  | 1.707863 | 1.75E-08 |
| TNFRSF19  | -1.86648666 | 6.47E-25   | MCM2     | 1.708479 | 2.25E-18 |
| AARD      | -1.86643115 | 6.39E-08   | GTSE1    | 1.709065 | 1.62E-16 |
| TEX26     | -1.86449903 | 2.25E-08   | SYNGR3   | 1.710155 | 0.000231 |
| PRH1-PRR4 | -1.86449273 | 3.94E-08   | CXCL8    | 1.711569 | 3.96E-05 |
| PNPLA7    | -1.86435807 | 1.73E-12   | B4GALNT1 | 1.712282 | 8.36E-07 |
| RAPSN     | -1.863841   | 2.15E-10   | PRR11    | 1.712806 | 5.80E-19 |
| MPZ       | -1.86343404 | 5.13E-12   | DTL      | 1.71405  | 2.98E-16 |
| FCER1A    | -1.86339274 | 9.31E-14   | HOXA1    | 1.714719 | 1.93E-10 |
| CNGA4     | -1.86227125 | 1.47E-07   | AGRN     | 1.717087 | 8.55E-23 |
| RAB17     | -1.86183658 | 5.73E-15   | SPC24    | 1.717864 | 7.78E-12 |
| DEGS2     | -1.86181262 | 3.93E-16   | HLA-G    | 1.719299 | 2.94E-06 |
| KLK12     | -1.86116663 | 7.04E-08   | NUDT11   | 1.7193   | 2.44E-06 |
| STMND1    | -1.86050974 | 7.55E-08   | DPPA2    | 1.722055 | 0.004679 |
| KRT34     | -1.86003466 | 1.17E-10   | CLSPN    | 1.722733 | 5.66E-11 |
| ARMC4     | -1.85950887 | 3.39E-08   | SCNN1D   | 1.723786 | 1.35E-05 |
| WDR63     | -1.85644829 | 1.49E-08   | LIM2     | 1.725472 | 0.010609 |
| LSMEM2    | -1.85566439 | 1.30E-08   | NLRP10   | 1.725501 | 0.000386 |
| CDO1      | -1.85554865 | 1.69E-11   | KLF7     | 1.726263 | 6.15E-18 |
| HSPB8     | -1.85458492 | 1.49E-20   | ELAVL2   | 1.727051 | 6.52E-05 |
| GABRP     | -1.85214889 | 6.06E-06   | CDC25C   | 1.727353 | 6.63E-10 |
| HSD11B1   | -1.84998108 | 1.81E-13   | FAM64A   | 1.728017 | 2.58E-11 |
| TACR1     | -1.84881702 | 1.53E-09   | SUGCT    | 1.728937 | 1.56E-09 |
| APOBEC4   | -1.84709773 | 4.16E-08   | RASGEF1A | 1.729828 | 1.89E-06 |
| ACPP      | -1.84675119 | 2.44E-20   | TTYH3    | 1.732211 | 3.63E-24 |
| FAM149A   | -1.8466004  | 1.50E-12   | LPCAT1   | 1.732706 | 3.36E-19 |

|           |             |          |            |          |          |
|-----------|-------------|----------|------------|----------|----------|
| UGT2B11   | -1.84589311 | 6.62E-09 | GLIS1      | 1.733357 | 4.99E-05 |
| RNF157    | -1.84511378 | 2.12E-11 | CELSR3     | 1.734037 | 1.18E-05 |
| SDPR      | -1.84260593 | 9.30E-22 | HIST1H4I   | 1.734105 | 3.99E-12 |
| LRRC20    | -1.84060597 | 1.91E-25 | KIAA1524   | 1.734109 | 4.95E-16 |
| BSND      | -1.83769455 | 4.58E-08 | AC109486   | 1.73471  | 0.000155 |
| NEK10     | -1.83722462 | 1.65E-08 | THBS2      | 1.736221 | 1.99E-08 |
| VWA2      | -1.83674132 | 1.19E-17 | MAP7D2     | 1.736674 | 0.003801 |
| GADD45B   | -1.83311425 | 5.15E-36 | IRX4       | 1.736883 | 3.21E-09 |
| PIP5K1B   | -1.83234954 | 5.40E-12 | OLR1       | 1.740014 | 1.56E-05 |
| KIF19     | -1.83160192 | 1.92E-08 | C16orf59   | 1.743214 | 1.28E-12 |
| PTGFR     | -1.82541151 | 1.38E-11 | THSD1      | 1.743877 | 3.87E-14 |
| BEX4      | -1.82505537 | 3.17E-22 | CDCA3      | 1.747    | 1.66E-13 |
| PPM1H     | -1.82481538 | 1.09E-13 | CDC6       | 1.747934 | 3.91E-19 |
| SEMA3G    | -1.82179096 | 9.51E-22 | MYO1B      | 1.749521 | 7.91E-19 |
| CYP4X1    | -1.82171649 | 1.68E-10 | MICB       | 1.75144  | 3.97E-11 |
| GJC3      | -1.81626637 | 4.55E-08 | GREM1      | 1.751762 | 1.01E-07 |
| IQGAP2    | -1.81513496 | 7.23E-17 | APLN       | 1.758362 | 9.90E-09 |
| HS3ST1    | -1.81327567 | 3.44E-20 | TOX2       | 1.758566 | 8.50E-09 |
| ANXA1     | -1.81126706 | 6.93E-21 | HIST1H2AC  | 1.759369 | 7.90E-07 |
| CDC20B    | -1.81123662 | 2.92E-06 | TROAP      | 1.767527 | 1.47E-17 |
| NEXN      | -1.81119586 | 1.38E-14 | COL2A1     | 1.767531 | 0.000943 |
| WDR49     | -1.8092031  | 6.83E-08 | DDX60L     | 1.768117 | 2.26E-12 |
| CYP2C18   | -1.80527213 | 7.97E-12 | MROH2A     | 1.768943 | 0.00761  |
| SLCO5A1   | -1.80510014 | 1.30E-09 | SULT1E1    | 1.769897 | 0.000331 |
| AADA2L2   | -1.80462024 | 1.47E-07 | SLC2A6     | 1.770501 | 2.66E-10 |
| CEACAM5   | -1.80376794 | 1.81E-07 | ADGRE1     | 1.770521 | 3.10E-05 |
| CD300LG   | -1.7997137  | 2.84E-08 | DLGAP5     | 1.771435 | 6.54E-22 |
| KRTAP19-3 | -1.79909231 | 9.39E-08 | KRT9       | 1.771882 | 2.01E-05 |
| CCDC114   | -1.79421452 | 8.74E-08 | NDC80      | 1.772133 | 6.88E-17 |
| MYO5C     | -1.79409108 | 3.15E-17 | SERPINE2   | 1.772297 | 7.51E-09 |
| KBTBD13   | -1.79401174 | 5.03E-09 | IGFBP3     | 1.77293  | 1.08E-08 |
| UBXN10    | -1.79389533 | 4.32E-10 | LHB        | 1.774814 | 6.86E-05 |
| PRR33     | -1.79302254 | 3.78E-13 | EXOC3L4    | 1.776177 | 0.000114 |
| CCL23     | -1.79170961 | 4.29E-11 | RPL39L     | 1.776346 | 2.16E-08 |
| CX3CR1    | -1.79038582 | 2.71E-14 | SPANXD     | 1.778431 | 0.0055   |
| LYVE1     | -1.79016883 | 2.85E-16 | PROCR      | 1.779053 | 9.78E-14 |
| IL1RN     | -1.78639816 | 6.13E-15 | SYCP2      | 1.780812 | 0.00233  |
| SLC1A1    | -1.78494891 | 1.93E-16 | FOXC2      | 1.78198  | 2.12E-06 |
| SCN7A     | -1.78248432 | 1.91E-08 | IFI35      | 1.782325 | 3.36E-13 |
| TM7SF2    | -1.78090041 | 4.16E-17 | ADAMDEC1   | 1.782353 | 2.65E-06 |
| IGSF10    | -1.7797744  | 4.22E-10 | TREM2      | 1.782908 | 3.10E-10 |
| SCGB3A2   | -1.779639   | 9.30E-06 | LA16c-380l | 1.783945 | 0.004112 |
| TRIM31    | -1.77930955 | 6.33E-08 | DDX58      | 1.785922 | 5.48E-11 |
| PLA2G16   | -1.77698063 | 1.51E-14 | SLC7A8     | 1.789555 | 1.30E-11 |
| PDGFD     | -1.77611655 | 1.10E-15 | GNLY       | 1.791842 | 8.93E-07 |
| SHISA4    | -1.77457432 | 7.09E-18 | VAV2       | 1.792684 | 8.45E-21 |
| IL17RD    | -1.77193778 | 3.22E-16 | MELK       | 1.794781 | 3.20E-19 |

|           |             |            |           |          |          |
|-----------|-------------|------------|-----------|----------|----------|
| CHST4     | -1.77045911 | 1.67E-07   | KYNU      | 1.79891  | 5.01E-07 |
| SAA4      | -1.76987039 | 3.22E-09   | WFDC12    | 1.801139 | 0.002609 |
| MGLL      | -1.76868706 | 1.02E-30   | CCL5      | 1.802148 | 2.16E-08 |
| PPL       | -1.76808432 | 2.61E-17   | PTGS2     | 1.802533 | 1.34E-05 |
| ATP1B4    | -1.7672798  | 5.35E-08   | ALG1L     | 1.803301 | 9.01E-12 |
| PPM1L     | -1.76582152 | 5.00E-26   | ROR2      | 1.803904 | 1.37E-08 |
| TMEM233   | -1.76337535 | 9.97E-10   | LUM       | 1.803909 | 1.19E-09 |
| SAA1      | -1.76250599 | 6.23E-09   | SNX10     | 1.804372 | 6.21E-16 |
| SYNGR1    | -1.76248444 | 2.83E-27   | CYP4F11   | 1.805249 | 0.000179 |
| NEURL3    | -1.76157574 | 7.85E-12   | KIF18B    | 1.806088 | 8.12E-19 |
| KRTAP5-7  | -1.75924291 | 8.69E-08   | TRIP13    | 1.811154 | 1.15E-17 |
| GDPD3     | -1.75915363 | 1.49E-12   | FAM178B   | 1.811782 | 0.000874 |
| PIH1D3    | -1.75812319 | 3.32E-08   | DLX6      | 1.812627 | 7.40E-05 |
| C1QTNF7   | -1.75805752 | 3.44E-08   | NID2      | 1.814797 | 2.50E-08 |
| DEFB4B    | -1.7558255  | 0.00098436 | CD276     | 1.815591 | 1.46E-25 |
| KRTAP10-4 | -1.75576785 | 3.92E-09   | FSCN1     | 1.8175   | 5.80E-25 |
| CCL2      | -1.75452325 | 3.45E-16   | INSM1     | 1.817863 | 0.011321 |
| MUC4      | -1.75308768 | 3.90E-06   | FAM132A   | 1.819545 | 8.29E-05 |
| SMARCD3   | -1.75127273 | 1.22E-22   | MICAL2    | 1.82308  | 1.11E-13 |
| AK7       | -1.74952002 | 5.97E-09   | PXDN      | 1.8239   | 7.58E-11 |
| RTN2      | -1.74900214 | 6.03E-25   | IL12RB2   | 1.82417  | 1.83E-07 |
| PLPPR3    | -1.7485644  | 5.50E-07   | C16orf74  | 1.824476 | 4.88E-16 |
| DIRAS1    | -1.74813916 | 2.76E-11   | BIRC5     | 1.831084 | 2.43E-21 |
| TMEM100   | -1.74784401 | 1.81E-09   | HERC5     | 1.831807 | 9.83E-11 |
| NKX3-1    | -1.74742406 | 3.54E-17   | CDC45     | 1.833965 | 2.54E-18 |
| KLHL30    | -1.74616043 | 9.13E-09   | CCNA1     | 1.834674 | 0.00012  |
| DAW1      | -1.74534568 | 6.02E-06   | SHOX2     | 1.841299 | 1.22E-06 |
| MYOD1     | -1.74459619 | 1.38E-07   | CILP2     | 1.841698 | 7.02E-05 |
| DEFB1     | -1.74371423 | 5.56E-10   | HIST1H3G  | 1.842036 | 8.61E-05 |
| CACNB4    | -1.7406258  | 1.10E-07   | SLC15A3   | 1.842338 | 1.84E-14 |
| CLIC6     | -1.74041453 | 1.90E-11   | NETO2     | 1.849106 | 1.15E-19 |
| CCDC33    | -1.7399295  | 1.43E-07   | PLCXD2    | 1.851331 | 0.000198 |
| MSTN      | -1.73917148 | 1.23E-07   | COL8A1    | 1.852054 | 1.26E-07 |
| NR4A3     | -1.7368462  | 8.55E-14   | AC055733. | 1.852113 | 0.000259 |
| CNN1      | -1.73543581 | 1.09E-13   | FOXL1     | 1.853889 | 4.32E-06 |
| ZNF844    | -1.73457729 | 1.75E-15   | APBA2     | 1.854287 | 3.06E-07 |
| SVIL      | -1.73432337 | 7.84E-37   | TK1       | 1.854308 | 9.86E-24 |
| VTCN1     | -1.73408977 | 2.42E-06   | E2F1      | 1.854624 | 2.65E-15 |
| LSMEM1    | -1.7321271  | 2.99E-11   | MYO7B     | 1.85673  | 0.000959 |
| SERPINA3  | -1.73128119 | 4.06E-07   | BCAT1     | 1.857529 | 5.94E-08 |
| RBP4      | -1.73106876 | 9.59E-07   | SMCP      | 1.858116 | 0.003066 |
| C4A       | -1.72973147 | 1.69E-09   | F2RL2     | 1.859705 | 3.99E-09 |
| NKX2-3    | -1.72966092 | 6.02E-06   | WDR66     | 1.860491 | 7.99E-15 |
| SASH1     | -1.7278572  | 3.79E-27   | AKR1C2    | 1.861923 | 9.67E-05 |
| FAM25A    | -1.72764384 | 1.06E-06   | AC004813. | 1.863259 | 0.003318 |
| CP        | -1.72741373 | 3.69E-06   | SNAI2     | 1.865701 | 1.74E-25 |
| LEXM      | -1.72731231 | 1.33E-10   | XAF1      | 1.868663 | 1.59E-10 |

|           |             |          |         |          |          |
|-----------|-------------|----------|---------|----------|----------|
| ACADSB    | -1.72681377 | 3.23E-33 | LAG3    | 1.869152 | 4.11E-07 |
| FYCO1     | -1.7263004  | 5.69E-33 | TNFSF4  | 1.870046 | 1.82E-06 |
| RNF180    | -1.72491235 | 1.88E-09 | ITGA3   | 1.872277 | 1.80E-16 |
| KRT73     | -1.72371748 | 6.09E-07 | USP18   | 1.875583 | 1.47E-12 |
| KAT2B     | -1.72315212 | 3.62E-35 | E2F7    | 1.876049 | 2.31E-12 |
| SLC12A2   | -1.72115523 | 1.05E-31 | BATF2   | 1.879953 | 3.29E-06 |
| FNDC4     | -1.71937715 | 1.39E-24 | ADAM8   | 1.880096 | 1.21E-12 |
| AIF1L     | -1.71917805 | 7.75E-18 | KIF4A   | 1.882376 | 3.93E-24 |
| SPNS2     | -1.71863641 | 8.39E-16 | FXD5    | 1.883848 | 9.30E-15 |
| C1orf204  | -1.71794574 | 5.10E-12 | HORMAD1 | 1.884587 | 4.29E-06 |
| TCTE1     | -1.71606473 | 2.36E-07 | OAS3    | 1.885674 | 2.31E-13 |
| LRRTM1    | -1.71581838 | 3.33E-07 | HJURP   | 1.89047  | 1.87E-19 |
| SVIP      | -1.71579544 | 7.61E-16 | AJAP1   | 1.89372  | 1.89E-05 |
| GAS2L2    | -1.71467754 | 2.19E-06 | AURKB   | 1.896806 | 1.12E-19 |
| CXCL12    | -1.71064814 | 1.14E-13 | SUN3    | 1.897001 | 0.000352 |
| PTGES3L   | -1.71028294 | 1.60E-11 | COL4A2  | 1.89812  | 2.82E-19 |
| GPRC5B    | -1.71006718 | 6.29E-19 | SPARC   | 1.904361 | 3.45E-12 |
| ANKRD35   | -1.70767725 | 3.35E-14 | DDX60   | 1.905315 | 1.32E-12 |
| CCDC78    | -1.70754254 | 3.50E-08 | CENPA   | 1.90786  | 6.85E-22 |
| IL34      | -1.70551933 | 3.83E-17 | NXPH4   | 1.909027 | 4.64E-10 |
| TNFRSF11A | -1.70262552 | 5.20E-13 | CDC20   | 1.910568 | 1.41E-23 |
| BSPRY     | -1.70196579 | 1.07E-15 | KIF14   | 1.914353 | 1.70E-12 |
| FAM134B   | -1.70067188 | 3.95E-15 | FADD    | 1.915701 | 1.34E-11 |
| ADCY2     | -1.69958642 | 4.74E-09 | PLK1    | 1.91722  | 1.53E-27 |
| MFSD4     | -1.69833692 | 4.55E-09 | SLC6A2  | 1.9181   | 2.83E-06 |
| BCAS1     | -1.69573239 | 1.46E-11 | EN2     | 1.923735 | 3.53E-05 |
| MAP3K19   | -1.69570961 | 3.46E-07 | FZD2    | 1.929194 | 2.41E-15 |
| DRC7      | -1.69469786 | 4.35E-07 | AURKA   | 1.934656 | 1.05E-25 |
| EPHX2     | -1.69425616 | 4.32E-23 | TSKS    | 1.938027 | 6.31E-05 |
| ASB14     | -1.69422041 | 6.66E-10 | RBP1    | 1.941045 | 4.48E-12 |
| BRINP1    | -1.69284701 | 2.87E-08 | CMPK2   | 1.945766 | 2.26E-10 |
| ICA1      | -1.69211577 | 3.89E-15 | NEFM    | 1.946804 | 0.000965 |
| FAM174B   | -1.68892682 | 2.67E-21 | TENM3   | 1.949859 | 2.76E-10 |
| ATP6V0E2  | -1.68863324 | 9.71E-18 | CHST11  | 1.95109  | 1.14E-21 |
| CSTB      | -1.68796284 | 1.97E-15 | TSPAN10 | 1.951337 | 1.71E-09 |
| CFAP61    | -1.68716454 | 2.79E-07 | SAGE1   | 1.955588 | 0.018512 |
| LPIN1     | -1.68580772 | 1.07E-29 | LAMB3   | 1.95686  | 1.05E-16 |
| PLEKHA6   | -1.68541525 | 5.45E-17 | MAGEA9B | 1.957744 | 0.001218 |
| FAM124A   | -1.68469515 | 8.09E-09 | TPX2    | 1.959615 | 1.69E-29 |
| AMY1A     | -1.68421314 | 9.95E-08 | NT5E    | 1.959664 | 4.12E-10 |
| DDO       | -1.68420185 | 8.03E-12 | CAV1    | 1.962083 | 9.81E-14 |
| ARHGAP36  | -1.68345951 | 1.42E-07 | MATN3   | 1.966936 | 2.12E-06 |
| ZBBX      | -1.68308059 | 4.42E-07 | IGFL2   | 1.967626 | 4.48E-06 |
| WDR78     | -1.68178874 | 2.77E-07 | NTSR1   | 1.967711 | 0.001947 |
| NHLRC4    | -1.67963423 | 4.54E-08 | CNTD2   | 1.977019 | 2.00E-05 |
| KRTAP5-8  | -1.67817092 | 1.28E-06 | COL27A1 | 1.977769 | 3.59E-16 |
| FGF18     | -1.67699751 | 1.16E-08 | SLC2A1  | 1.98296  | 4.15E-16 |



|           |             |          |          |          |          |
|-----------|-------------|----------|----------|----------|----------|
| MAP6      | -1.6753391  | 1.03E-07 | GPRIN1   | 1.985577 | 1.85E-21 |
| TLL10     | -1.67439971 | 3.49E-06 | HOXB13   | 1.985636 | 0.00048  |
| FRMPD1    | -1.67336822 | 6.49E-07 | IL13RA2  | 1.988477 | 0.001144 |
| ETV1      | -1.67190497 | 2.02E-11 | CXCL9    | 1.990401 | 7.11E-06 |
| CYP2A13   | -1.67135626 | 7.08E-07 | CAMK2N2  | 1.993112 | 2.89E-06 |
| FAM57B    | -1.67098521 | 5.47E-07 | CNTNAP2  | 1.994909 | 1.45E-05 |
| BIN1      | -1.67013287 | 3.15E-16 | FGF3     | 1.995028 | 0.020764 |
| AGL       | -1.66921048 | 1.27E-34 | CGB8     | 1.999489 | 8.82E-05 |
| SLC6A4    | -1.66884237 | 9.65E-08 | UBE2C    | 1.999705 | 2.10E-26 |
| EPM2A     | -1.66629438 | 4.86E-16 | PDCD1LG2 | 2.003354 | 2.63E-08 |
| CFAP221   | -1.66616655 | 3.04E-07 | PKMYT1   | 2.003632 | 2.42E-21 |
| NR4A2     | -1.66586053 | 3.16E-15 | KIF2C    | 2.009874 | 3.73E-29 |
| TMEM139   | -1.6652516  | 1.04E-06 | FOXM1    | 2.010268 | 6.28E-24 |
| KRT77     | -1.66274392 | 7.56E-06 | BMP1     | 2.010462 | 1.37E-29 |
| KRTAP5-1  | -1.66256731 | 6.38E-06 | HAP1     | 2.012093 | 1.19E-06 |
| TMEM210   | -1.6608791  | 1.50E-07 | ANO1     | 2.013824 | 1.76E-08 |
| SIX1      | -1.65942663 | 1.16E-19 | SCG5     | 2.015123 | 5.61E-08 |
| EIF4EBP3  | -1.65818818 | 3.00E-25 | FNDC1    | 2.016168 | 1.27E-06 |
| NAALADL2  | -1.65720112 | 3.01E-08 | GRP      | 2.019887 | 1.52E-05 |
| FOXC1     | -1.65697096 | 2.22E-23 | SH2D2A   | 2.024912 | 1.32E-13 |
| ADH7      | -1.65658188 | 1.38E-05 | NLRP7    | 2.026761 | 8.76E-05 |
| RHOU      | -1.65392845 | 2.61E-22 | APOL1    | 2.02971  | 3.34E-12 |
| MC5R      | -1.65373119 | 1.06E-06 | LHX1     | 2.031357 | 1.09E-05 |
| WNK2      | -1.65344693 | 8.17E-08 | CEP55    | 2.032212 | 2.08E-26 |
| PRUNE2    | -1.65311633 | 1.22E-07 | CDCA5    | 2.034948 | 2.46E-27 |
| FRMD3     | -1.65199552 | 4.90E-09 | EPSTI1   | 2.037472 | 1.10E-12 |
| SOD3      | -1.65034533 | 1.82E-19 | PLEK2    | 2.041913 | 2.39E-17 |
| CYP11A1   | -1.64995246 | 2.15E-07 | EPHB2    | 2.043229 | 2.88E-12 |
| TMEM143   | -1.64590114 | 5.83E-20 | NRIP3    | 2.043899 | 2.14E-09 |
| KRTAP24-1 | -1.64580114 | 5.03E-08 | CTSV     | 2.04678  | 3.39E-13 |
| DOK5      | -1.64577657 | 3.78E-11 | NID1     | 2.048518 | 1.20E-12 |
| HCAR1     | -1.64506216 | 2.72E-06 | COL6A1   | 2.055768 | 1.95E-13 |
| RAET1E    | -1.64395862 | 1.56E-12 | COL4A5   | 2.062503 | 2.16E-18 |
| LONRF2    | -1.64323838 | 1.39E-07 | WARS     | 2.064277 | 2.37E-09 |
| BCL2L15   | -1.64280168 | 3.37E-07 | SMC1B    | 2.064319 | 0.001361 |
| CLDN4     | -1.64064574 | 4.08E-15 | HOXC4    | 2.065654 | 1.14E-07 |
| ADGRF1    | -1.63948212 | 6.86E-09 | STRA6    | 2.066683 | 4.89E-07 |
| MEF2C     | -1.63941067 | 2.08E-10 | KIF26B   | 2.066948 | 2.07E-10 |
| TUBA4B    | -1.63926943 | 8.72E-06 | AKR1C1   | 2.073112 | 8.17E-05 |
| SCT       | -1.6384219  | 3.80E-08 | OAS2     | 2.073387 | 2.32E-15 |
| DPP4      | -1.63836005 | 1.75E-12 | MYL7     | 2.077465 | 0.00695  |
| SNTB1     | -1.63813119 | 2.16E-22 | ZNF469   | 2.07806  | 9.78E-09 |
| C1orf158  | -1.6377186  | 6.37E-07 | ITGA6    | 2.084542 | 2.89E-18 |
| ASB4      | -1.63741167 | 4.09E-07 | SIGLEC12 | 2.085652 | 2.74E-06 |
| WISP2     | -1.63740554 | 1.26E-07 | PPP4R4   | 2.087442 | 1.22E-08 |
| RNF186    | -1.63668921 | 1.26E-06 | ADAMTS14 | 2.089008 | 1.92E-10 |
| ZDHC15    | -1.63588234 | 2.13E-07 | TH       | 2.089076 | 0.000378 |

|          |             |          |           |          |          |
|----------|-------------|----------|-----------|----------|----------|
| CHST6    | -1.63467256 | 4.91E-09 | TLX3      | 2.089796 | 0.001891 |
| XPNPEP2  | -1.63384554 | 4.17E-08 | IDO1      | 2.092127 | 9.77E-06 |
| LRRC18   | -1.63374673 | 7.58E-07 | DCBLD1    | 2.09549  | 1.35E-18 |
| PODN     | -1.63369605 | 4.59E-11 | SULF1     | 2.102849 | 4.15E-11 |
| CATIP    | -1.63274795 | 5.09E-06 | HIST1H2BC | 2.108668 | 8.28E-06 |
| EHF      | -1.63029893 | 3.69E-16 | SLAMF9    | 2.114024 | 4.58E-06 |
| SCNN1A   | -1.6299224  | 9.42E-15 | ZIC5      | 2.115874 | 4.41E-07 |
| ZNF853   | -1.62954137 | 5.29E-14 | CSPG4     | 2.118043 | 7.35E-12 |
| SPRR2A   | -1.62944853 | 9.00E-07 | GPR158    | 2.11873  | 4.40E-06 |
| PTPRN2   | -1.62859642 | 5.83E-13 | ULBP2     | 2.12129  | 1.05E-19 |
| SYN2     | -1.62561841 | 1.10E-06 | FIBCD1    | 2.129903 | 0.000202 |
| MT-ND1   | -1.62546248 | 8.94E-29 | DPF1      | 2.13013  | 9.00E-08 |
| RSPH9    | -1.62267409 | 8.70E-08 | NEFL      | 2.132082 | 2.01E-07 |
| TMEM125  | -1.62114429 | 3.72E-17 | ICAM5     | 2.13664  | 1.12E-07 |
| EMCN     | -1.61854638 | 3.17E-16 | AKR1C3    | 2.139787 | 5.67E-06 |
| MMP7     | -1.61748058 | 2.91E-07 | PMEPA1    | 2.152553 | 6.56E-19 |
| MT-ND5   | -1.61697046 | 5.61E-24 | HIST1H3H  | 2.153318 | 1.20E-10 |
| FUT3     | -1.61639083 | 8.45E-13 | IL1A      | 2.154958 | 6.76E-08 |
| LMCD1    | -1.61554355 | 2.26E-20 | HOXA11    | 2.158083 | 1.18E-05 |
| NKAPL    | -1.61451758 | 1.38E-07 | UCN2      | 2.161571 | 7.68E-12 |
| RND1     | -1.61347602 | 1.26E-13 | IGFL3     | 2.165608 | 0.000133 |
| BTC      | -1.6130767  | 5.29E-12 | FOXD1     | 2.167106 | 1.01E-13 |
| PRSS3    | -1.61286342 | 1.46E-06 | GPR39     | 2.168226 | 6.97E-11 |
| GMDS     | -1.61281475 | 1.31E-41 | LRRC15    | 2.168439 | 2.27E-07 |
| SLC25A25 | -1.61067413 | 1.46E-27 | ITGA11    | 2.172801 | 2.92E-07 |
| MANSC1   | -1.61018287 | 2.49E-21 | NRG1      | 2.174851 | 1.38E-09 |
| SLC19A3  | -1.60917799 | 9.95E-07 | HOXC6     | 2.175152 | 8.38E-07 |
| INPP5J   | -1.60911922 | 7.65E-13 | DMRTA2    | 2.176737 | 0.000333 |
| AOC3     | -1.60842954 | 8.79E-16 | MYBL2     | 2.178346 | 1.63E-29 |
| ATOH8    | -1.60658916 | 1.18E-09 | FEZ1      | 2.179055 | 1.92E-12 |
| EGR3     | -1.60427804 | 1.11E-13 | CYP27C1   | 2.185668 | 1.03E-13 |
| TPM1     | -1.60415828 | 1.13E-17 | AL137860. | 2.186134 | 2.79E-11 |
| SIM2     | -1.6039318  | 1.27E-08 | PROC      | 2.187608 | 9.18E-08 |
| GNMT     | -1.60192914 | 1.52E-08 | DNMT3B    | 2.200569 | 1.44E-14 |
| CACNA2D1 | -1.59913365 | 1.60E-12 | COL5A3    | 2.205415 | 1.06E-16 |
| CSTA     | -1.59865775 | 1.83E-10 | IFI27     | 2.208987 | 3.02E-15 |
| LCN2     | -1.59725787 | 1.47E-08 | AMIGO2    | 2.210344 | 1.11E-13 |
| ATP8A1   | -1.59623624 | 7.61E-11 | C6orf141  | 2.210464 | 9.68E-12 |
| SLC25A23 | -1.59579057 | 1.93E-29 | SPOCD1    | 2.216383 | 3.62E-08 |
| DPF3     | -1.59559858 | 1.16E-07 | NOBOX     | 2.222819 | 0.008664 |
| FMO5     | -1.59531193 | 1.64E-07 | IFI44L    | 2.223266 | 1.03E-10 |
| MPC1     | -1.59522238 | 5.57E-49 | COL7A1    | 2.223538 | 4.40E-21 |
| PRR29    | -1.5950918  | 4.18E-07 | PDPN      | 2.226189 | 3.78E-19 |
| ACSS3    | -1.58857885 | 1.00E-06 | GPR176    | 2.226945 | 3.43E-14 |
| PRG4     | -1.58837664 | 1.18E-06 | GNGT1     | 2.228813 | 2.19E-06 |
| ZBTB7C   | -1.58795905 | 1.77E-11 | VEGFC     | 2.239808 | 5.06E-12 |
| C22orf15 | -1.58698771 | 2.00E-05 | SERPINH1  | 2.239881 | 3.53E-29 |

|          |             |            |           |          |          |
|----------|-------------|------------|-----------|----------|----------|
| PGPEP1L  | -1.58666685 | 2.05E-07   | FGF19     | 2.240944 | 0.00097  |
| FRY      | -1.58603939 | 9.15E-10   | U82695.5  | 2.241755 | 0.012002 |
| FAM13C   | -1.58478735 | 1.02E-08   | IFIT2     | 2.247887 | 1.26E-10 |
| AR       | -1.58435173 | 2.07E-07   | GJC1      | 2.254103 | 8.07E-12 |
| MAATS1   | -1.58336216 | 9.42E-06   | HIST1H2AI | 2.254525 | 6.16E-08 |
| VSIG10L  | -1.58270073 | 1.77E-09   | HBE1      | 2.254566 | 0.003057 |
| PBX1     | -1.58080177 | 5.46E-17   | RGS4      | 2.255202 | 5.05E-09 |
| KCNMB1   | -1.5785726  | 5.79E-10   | SOX14     | 2.26215  | 0.037064 |
| GPT2     | -1.57838119 | 1.50E-27   | STRA8     | 2.264941 | 0.001675 |
| GPRASP1  | -1.57827881 | 8.09E-09   | LY6K      | 2.270966 | 3.27E-15 |
| IL33     | -1.57769374 | 1.70E-07   | EN1       | 2.282471 | 2.22E-10 |
| TFCP2L1  | -1.57749873 | 7.55E-16   | DFNA5     | 2.287064 | 1.35E-18 |
| HRASLS   | -1.57422981 | 1.17E-10   | ENO2      | 2.287143 | 2.32E-13 |
| TTYH1    | -1.57393293 | 1.57E-06   | PNCK      | 2.289643 | 1.40E-05 |
| SPATA6   | -1.57289746 | 1.46E-09   | CXCL13    | 2.293665 | 5.08E-11 |
| TNS1     | -1.57226826 | 6.52E-20   | FSTL3     | 2.302825 | 5.66E-15 |
| FHIT     | -1.57059224 | 5.13E-08   | NPBWR1    | 2.303852 | 2.59E-06 |
| CCDC129  | -1.57035679 | 6.27E-06   | COL4A1    | 2.308324 | 9.88E-23 |
| TMEM212  | -1.57031714 | 1.03E-06   | CREG2     | 2.311859 | 2.09E-07 |
| DACH1    | -1.57011404 | 4.27E-07   | RTP3      | 2.318672 | 0.000118 |
| RAB9B    | -1.56930742 | 2.50E-07   | COL6A3    | 2.321531 | 1.39E-11 |
| FAM26D   | -1.56910136 | 2.09E-07   | C1QL1     | 2.322617 | 2.76E-08 |
| FOSB     | -1.5684466  | 2.90E-09   | NPW       | 2.335983 | 6.27E-06 |
| ANXA9    | -1.56705394 | 3.61E-12   | KIAA1644  | 2.343598 | 1.02E-09 |
| HSD17B13 | -1.56570698 | 4.48E-05   | IGFBP6    | 2.346993 | 6.21E-09 |
| WNK4     | -1.56512015 | 2.38E-07   | HOXC11    | 2.35187  | 1.99E-08 |
| MTRNR2L1 | -1.56468206 | 0.00641945 | TFPI2     | 2.353955 | 9.46E-05 |
| FDCSP    | -1.56412108 | 0.00860653 | IFIT1     | 2.354627 | 2.39E-11 |
| TTC9     | -1.56377435 | 5.99E-16   | STEAP1B   | 2.360199 | 1.78E-07 |
| ECHDC3   | -1.55660448 | 4.39E-12   | TNC       | 2.361412 | 3.24E-14 |
| RSPO1    | -1.55612596 | 5.84E-07   | HOXC8     | 2.362059 | 3.65E-07 |
| RAI2     | -1.5558139  | 3.60E-15   | IFIT3     | 2.371115 | 2.76E-12 |
| DPCR1    | -1.55508449 | 3.32E-07   | CCL26     | 2.373758 | 8.28E-06 |
| PRKAR2B  | -1.55397686 | 2.82E-13   | LHX5      | 2.376602 | 1.53E-07 |
| SPARCL1  | -1.55374147 | 1.17E-18   | CHST2     | 2.377215 | 4.54E-13 |
| C9orf116 | -1.55235741 | 1.04E-09   | IFI44     | 2.387303 | 8.19E-18 |
| EPB41L4A | -1.55169382 | 1.21E-11   | CTHRC1    | 2.3913   | 7.59E-14 |
| HS3ST6   | -1.55046226 | 2.22E-06   | CHIT1     | 2.403157 | 5.78E-05 |
| FLG2     | -1.54963393 | 0.00192937 | HTR7      | 2.411767 | 2.32E-13 |
| OXGR1    | -1.54956308 | 2.37E-08   | HOXC9     | 2.415877 | 9.09E-10 |
| SOWAHA   | -1.54906828 | 5.01E-06   | KREMEN2   | 2.420939 | 1.47E-09 |
| MUC20    | -1.54786025 | 2.45E-07   | FAP       | 2.421235 | 1.86E-13 |
| HTR3B    | -1.54720204 | 1.41E-06   | GAGE2A    | 2.425005 | 0.006968 |
| BEND7    | -1.54691154 | 1.30E-07   | SPANXC    | 2.431119 | 0.000307 |
| CRABP1   | -1.54548756 | 4.58E-07   | CYP27B1   | 2.434025 | 5.60E-13 |
| CDH19    | -1.54291264 | 3.85E-06   | PCSK9     | 2.438578 | 1.39E-11 |
| ALDH6A1  | -1.54279323 | 6.43E-27   | SPP1      | 2.440537 | 5.14E-07 |

|             |             |            |          |          |          |
|-------------|-------------|------------|----------|----------|----------|
| DUOXA2      | -1.54187733 | 8.81E-07   | DKK1     | 2.457908 | 4.83E-08 |
| PCSK2       | -1.54159229 | 5.12E-06   | IGF2BP2  | 2.459179 | 1.08E-23 |
| CCDC65      | -1.53976979 | 4.33E-08   | NGB      | 2.464708 | 3.38E-05 |
| DDAH1       | -1.53916072 | 3.35E-20   | LAMP5    | 2.473411 | 1.54E-11 |
| DCDC2B      | -1.53869004 | 7.58E-06   | ITGA5    | 2.484392 | 3.40E-22 |
| TPRG1       | -1.53723471 | 2.26E-14   | TM4SF19  | 2.486677 | 2.77E-14 |
| RPRM        | -1.53576613 | 3.68E-07   | TENM2    | 2.492052 | 1.34E-17 |
| IL6         | -1.53535964 | 7.70E-08   | CLDN6    | 2.496968 | 0.000736 |
| DYRK1B      | -1.53499983 | 5.93E-22   | CXorf67  | 2.512958 | 0.006411 |
| SLC7A2      | -1.53364473 | 1.53E-09   | FOXL2    | 2.51664  | 5.10E-07 |
| TGM1        | -1.53347162 | 1.21E-07   | DNAH17   | 2.522127 | 8.52E-11 |
| CPEB3       | -1.53098437 | 2.04E-13   | STC2     | 2.525985 | 1.18E-13 |
| CLDN23      | -1.53087798 | 4.14E-19   | SH2D5    | 2.543463 | 8.19E-11 |
| FHL3        | -1.52844176 | 1.14E-24   | PLAU     | 2.559434 | 1.02E-25 |
| CFAP161     | -1.5246774  | 1.97E-05   | PADI3    | 2.562991 | 9.26E-08 |
| ADH1C       | -1.52413556 | 0.00259473 | ZIC2     | 2.566381 | 3.65E-11 |
| ISM1        | -1.52253983 | 2.15E-14   | IGF2BP3  | 2.573792 | 3.94E-10 |
| SCGN        | -1.52207523 | 2.61E-06   | WNT2     | 2.573918 | 2.02E-09 |
| C2CD4B      | -1.52186796 | 5.43E-09   | TRIML2   | 2.578812 | 1.91E-05 |
| MT-ND6      | -1.51961797 | 1.00E-20   | C1QTNF6  | 2.585646 | 2.52E-22 |
| PTGER3      | -1.51930598 | 5.87E-09   | COX7B2   | 2.591902 | 0.003075 |
| ANGPTL5     | -1.51371281 | 1.97E-06   | COL4A6   | 2.592181 | 1.06E-14 |
| RP5-1187M17 | -1.5136196  | 1.12E-14   | TREM1    | 2.603156 | 4.39E-10 |
| DNASE1L2    | -1.51223513 | 6.33E-07   | P3H2     | 2.606334 | 3.99E-13 |
| CHL1        | -1.51200112 | 8.01E-08   | SPINK6   | 2.612302 | 0.000138 |
| SLC16A11    | -1.5093693  | 1.72E-09   | FST      | 2.614013 | 7.98E-16 |
| LRRC31      | -1.50781693 | 4.15E-06   | SLC22A1  | 2.622255 | 9.53E-06 |
| ACAA2       | -1.5057886  | 1.94E-21   | OASL     | 2.627273 | 6.36E-13 |
| ATP7B       | -1.5052362  | 7.98E-09   | BST2     | 2.634704 | 3.66E-17 |
| STK33       | -1.505143   | 8.38E-06   | HKDC1    | 2.657407 | 4.21E-06 |
| APBB1       | -1.50468884 | 1.89E-19   | WNT7A    | 2.657865 | 3.20E-13 |
| TNFSF15     | -1.50333337 | 2.67E-09   | COL1A2   | 2.672268 | 2.32E-13 |
| CCDC173     | -1.49978014 | 1.18E-05   | CD70     | 2.686096 | 1.85E-08 |
| DLG2        | -1.4997618  | 8.38E-06   | ASPN     | 2.687292 | 6.02E-11 |
| LIPE        | -1.49944372 | 1.31E-15   | ACTL8    | 2.687488 | 0.000269 |
| DTHD1       | -1.49889662 | 2.87E-05   | PCDHGC5  | 2.689688 | 1.35E-07 |
| DNAH6       | -1.498136   | 2.03E-05   | HOXA10   | 2.696673 | 5.29E-10 |
| KIAA1211L   | -1.49771437 | 9.05E-18   | PDIA2    | 2.698415 | 0.000617 |
| C3          | -1.49727182 | 3.81E-11   | IFNK     | 2.716141 | 0.00057  |
| PCK1        | -1.49704481 | 2.24E-05   | ZFP42    | 2.74379  | 0.000531 |
| NNT         | -1.49583498 | 8.18E-26   | NR5A1    | 2.749573 | 0.00288  |
| KCNQ1       | -1.49040778 | 2.16E-13   | GBP5     | 2.757863 | 3.35E-09 |
| PITX3       | -1.49023361 | 1.38E-07   | CT45A10  | 2.758223 | 0.000864 |
| STBD1       | -1.48984377 | 1.91E-10   | ADAMTS12 | 2.78331  | 1.56E-12 |
| SCARA3      | -1.4876643  | 1.09E-15   | DUSP9    | 2.78612  | 2.01E-11 |
| TMPRSS11E   | -1.48755777 | 4.00E-06   | CXCL10   | 2.787502 | 3.16E-08 |
| ACADM       | -1.48692226 | 5.49E-39   | KLHDC7B  | 2.796921 | 3.56E-09 |

|         |             |            |          |          |          |
|---------|-------------|------------|----------|----------|----------|
| PLCL1   | -1.48598345 | 4.51E-09   | IBSP     | 2.799746 | 1.79E-07 |
| MPV17L  | -1.48594392 | 4.65E-08   | COL22A1  | 2.813253 | 1.47E-08 |
| FOLH1   | -1.48511505 | 6.42E-09   | SLCO1B3  | 2.815026 | 3.24E-08 |
| PITX1   | -1.48492141 | 5.83E-17   | MFAP2    | 2.821341 | 1.72E-30 |
| RRAD    | -1.48432748 | 3.10E-07   | MMP3     | 2.829181 | 1.26E-09 |
| KCNJ12  | -1.48326926 | 3.38E-09   | MAGEC1   | 2.830028 | 0.000828 |
| LDOC1   | -1.48318504 | 4.15E-09   | WISP1    | 2.845526 | 3.97E-14 |
| SLC8A3  | -1.48235728 | 3.92E-06   | GDPD2    | 2.853759 | 7.89E-09 |
| LIFR    | -1.48165032 | 2.74E-10   | NELL2    | 2.868014 | 2.48E-11 |
| IKZF2   | -1.47854357 | 1.46E-16   | ADAMTS2  | 2.879755 | 2.42E-18 |
| ACAT1   | -1.47852443 | 3.62E-34   | RSAD2    | 2.890212 | 1.84E-14 |
| KRT2    | -1.47852214 | 0.00501183 | HOXB9    | 2.891257 | 4.28E-07 |
| CGN     | -1.47718552 | 5.89E-16   | FGFBP2   | 2.914231 | 0.000597 |
| MT-CYB  | -1.47662267 | 1.12E-22   | FBN2     | 2.947781 | 2.52E-10 |
| SNRPN   | -1.47655997 | 5.16E-19   | COL3A1   | 2.973184 | 2.80E-14 |
| KNDC1   | -1.47638933 | 1.17E-05   | IGF2BP1  | 2.985145 | 3.23E-07 |
| GAL     | -1.47545121 | 0.00031136 | ZNF114   | 2.992925 | 4.47E-13 |
| SCGB1D2 | -1.47497845 | 0.01556697 | NTS      | 2.997536 | 0.001911 |
| IDI2    | -1.47449824 | 9.45E-07   | MMP1     | 3.002983 | 1.03E-10 |
| SMAD9   | -1.47424826 | 1.35E-09   | PLAC1    | 3.035506 | 3.13E-10 |
| THSD4   | -1.47299003 | 5.04E-19   | LOXL2    | 3.036175 | 2.41E-24 |
| MRAP    | -1.47279557 | 6.27E-06   | ANXA10   | 3.038977 | 3.13E-05 |
| ITGA7   | -1.46984181 | 2.13E-09   | KHDC1L   | 3.047043 | 8.31E-10 |
| RIBC1   | -1.46968963 | 1.34E-06   | HOXD11   | 3.061161 | 1.56E-17 |
| NCCRP1  | -1.46928553 | 1.81E-07   | ADAM12   | 3.074315 | 2.39E-16 |
| MAML3   | -1.46909286 | 4.91E-17   | ARTN     | 3.08283  | 1.72E-18 |
| SLC44A3 | -1.46832649 | 1.47E-23   | COL12A1  | 3.090697 | 3.31E-24 |
| CASQ2   | -1.46786921 | 0.00014445 | GPR50    | 3.101375 | 1.10E-05 |
| DRD2    | -1.46518655 | 8.01E-05   | TKTL1    | 3.109099 | 0.010804 |
| EDNRB   | -1.46496015 | 1.55E-12   | FOLR3    | 3.10965  | 5.97E-08 |
| GULP1   | -1.46437967 | 3.13E-09   | GRIN2D   | 3.120544 | 1.23E-13 |
| PRELP   | -1.4622305  | 1.10E-07   | SERPINE1 | 3.121438 | 3.98E-19 |
| SNTA1   | -1.45924623 | 1.08E-20   | GTSF1    | 3.138109 | 7.99E-07 |
| ART5    | -1.45893134 | 1.99E-06   | HOXD10   | 3.148779 | 1.63E-18 |
| PRKAG3  | -1.45832345 | 5.25E-06   | COL5A2   | 3.158131 | 7.42E-21 |
| RPS6KA6 | -1.45561496 | 1.47E-05   | SPDYC    | 3.160436 | 4.13E-05 |
| ZSCAN18 | -1.45544457 | 9.96E-12   | HOXD13   | 3.16047  | 3.06E-11 |
| MACROD1 | -1.4540587  | 4.70E-17   | COL1A1   | 3.167364 | 1.33E-16 |
| SYBU    | -1.45392928 | 1.13E-11   | CDKN2A   | 3.172204 | 1.79E-09 |
| FUT2    | -1.45261581 | 2.24E-17   | IFI6     | 3.1802   | 3.48E-19 |
| NEBL    | -1.45176311 | 2.51E-18   | LAMA3    | 3.198223 | 2.22E-21 |
| PDE6A   | -1.45172459 | 6.92E-06   | HOXC10   | 3.226102 | 7.75E-14 |
| RBM20   | -1.45169147 | 9.95E-07   | RNASE10  | 3.237391 | 3.77E-09 |
| VWA3A   | -1.45142688 | 2.09E-05   | PLPP4    | 3.249797 | 2.60E-12 |
| DNAH12  | -1.45109216 | 1.30E-05   | RPE65    | 3.254244 | 1.77E-08 |
| TEKT4   | -1.45070481 | 0.0001049  | COL5A1   | 3.294954 | 5.11E-23 |
| GAS7    | -1.45031496 | 1.03E-16   | AIM2     | 3.302717 | 8.73E-22 |

|           |             |            |         |          |          |
|-----------|-------------|------------|---------|----------|----------|
| MEOX2     | -1.44981182 | 2.11E-09   | FN1     | 3.348373 | 8.03E-15 |
| NSUN7     | -1.44793777 | 1.90E-07   | IL24    | 3.374314 | 3.70E-13 |
| RNF224    | -1.44449521 | 6.42E-07   | C4orf26 | 3.378161 | 1.67E-05 |
| MUC22     | -1.44428004 | 7.61E-05   | POSTN   | 3.383569 | 1.72E-15 |
| KRTAP5-11 | -1.44371986 | 2.27E-06   | CNGB1   | 3.401435 | 6.80E-12 |
| BTG2      | -1.44348688 | 8.09E-22   | HOXB7   | 3.492905 | 4.86E-18 |
| TGM5      | -1.44335308 | 1.65E-09   | PNMA5   | 3.509753 | 0.001061 |
| NTRK3     | -1.44329232 | 1.50E-05   | CXCL11  | 3.522145 | 2.48E-09 |
| VWA5A     | -1.44252373 | 1.21E-21   | PAEP    | 3.530659 | 4.22E-10 |
| DYDC2     | -1.44193111 | 5.35E-05   | MAGEA10 | 3.539261 | 0.000106 |
| AQP1      | -1.44172367 | 8.88E-20   | SOHLH1  | 3.552423 | 0.000373 |
| CLIC3     | -1.44148322 | 2.94E-08   | IL11    | 3.583701 | 2.53E-17 |
| CYP27A1   | -1.44146174 | 9.02E-09   | PTHLH   | 3.6495   | 1.13E-21 |
| RGS22     | -1.44046147 | 1.59E-05   | PAGE2   | 3.665984 | 0.003091 |
| DOC2B     | -1.44029751 | 1.75E-10   | AMTN    | 3.683435 | 1.20E-07 |
| RNF225    | -1.44004031 | 4.09E-08   | MMP12   | 3.739761 | 1.89E-21 |
| GADL1     | -1.43946688 | 1.97E-06   | MMP9    | 3.740885 | 1.52E-21 |
| KLHL34    | -1.43878173 | 1.81E-05   | MMP10   | 3.791293 | 7.93E-12 |
| GOT1      | -1.43868537 | 8.21E-42   | SPANXB1 | 3.799779 | 3.15E-05 |
| NMU       | -1.43834941 | 1.80E-09   | HMGA2   | 3.806837 | 2.20E-13 |
| PDE4B     | -1.43774305 | 5.47E-11   | CSF2    | 3.846054 | 7.80E-12 |
| OGDHL     | -1.43713674 | 1.91E-06   | TGFBI   | 3.850227 | 1.65E-29 |
| TCEAL7    | -1.43627112 | 1.04E-10   | COL11A1 | 3.860747 | 9.41E-13 |
| DRC3      | -1.43572478 | 1.77E-06   | MAGEA12 | 3.903418 | 0.000142 |
| CDH15     | -1.43543689 | 1.08E-06   | MAGEA11 | 3.966342 | 1.25E-06 |
| SEMA3E    | -1.43449962 | 1.71E-05   | ISG15   | 3.996333 | 2.25E-21 |
| DNAAF1    | -1.43419977 | 5.42E-05   | INHBA   | 4.028124 | 3.79E-26 |
| ARHGAP20  | -1.43208509 | 1.26E-06   | MAGEC2  | 4.052403 | 5.85E-05 |
| GYPC      | -1.43081732 | 6.17E-17   | PRAME   | 4.09101  | 8.37E-09 |
| LBX1      | -1.43059282 | 1.47E-05   | LAMC2   | 4.109002 | 6.17E-31 |
| GALNT12   | -1.42989764 | 4.09E-15   | CSAG1   | 4.15113  | 6.00E-08 |
| LRG1      | -1.42981672 | 1.78E-09   | CTAG2   | 4.201983 | 0.000119 |
| CRACR2A   | -1.42976213 | 2.25E-08   | GAST    | 4.350448 | 6.58E-14 |
| SOBP      | -1.42922211 | 3.89E-09   | MAGEA1  | 4.457484 | 1.73E-05 |
| METTL21C  | -1.42832035 | 3.08E-06   | MAGEB2  | 4.474905 | 3.60E-06 |
| AMIGO1    | -1.42792007 | 1.49E-11   | CALB1   | 4.562949 | 2.45E-07 |
| ELANE     | -1.42746682 | 1.71E-05   | COL10A1 | 4.577735 | 1.07E-17 |
| S100A8    | -1.4273614  | 2.58E-07   | MMP11   | 4.677904 | 6.69E-23 |
| CNFN      | -1.42730678 | 8.79E-06   | MAGEA3  | 4.815408 | 8.72E-08 |
| ROR1      | -1.4268658  | 6.73E-09   | MAGEA6  | 5.267355 | 1.90E-08 |
| PIK3C2G   | -1.42488069 | 4.18E-07   | MAGEA4  | 5.356454 | 1.27E-08 |
| RSPH14    | -1.42429076 | 3.98E-05   | CA9     | 5.741866 | 1.01E-25 |
| C10orf10  | -1.42426945 | 2.79E-12   | MMP13   | 6.400508 | 2.00E-18 |
| SLCO4C1   | -1.4235116  | 0.00014241 |         |          |          |
| PTGIS     | -1.42255958 | 4.12E-06   |         |          |          |
| FAM110D   | -1.42238072 | 1.70E-09   |         |          |          |
| MACC1     | -1.42204343 | 3.90E-12   |         |          |          |

|           |             |            |
|-----------|-------------|------------|
| SLC9A4    | -1.42165447 | 0.00017568 |
| ZBTB47    | -1.42078119 | 3.73E-21   |
| ZNF415    | -1.42008066 | 3.66E-07   |
| SLC46A2   | -1.41931547 | 2.59E-05   |
| EXPH5     | -1.4178849  | 3.77E-16   |
| TRNP1     | -1.4168767  | 4.50E-14   |
| 2-Mar     | -1.41684518 | 1.33E-14   |
| ARHGEF38  | -1.41664254 | 4.38E-05   |
| SPRR2B    | -1.41567053 | 0.00058803 |
| SLC15A2   | -1.41327569 | 1.83E-11   |
| USP2      | -1.41235554 | 3.74E-11   |
| MYH1      | -1.41224102 | 0.00506716 |
| CYP1A1    | -1.41157293 | 0.00228013 |
| CFAP46    | -1.41081313 | 5.59E-05   |
| ETFDH     | -1.40950843 | 2.85E-36   |
| FLG       | -1.40948893 | 0.00046779 |
| FGF6      | -1.40908241 | 2.21E-05   |
| C1orf127  | -1.40903524 | 3.80E-05   |
| CSRNP1    | -1.40675448 | 2.59E-22   |
| FAM198A   | -1.4043975  | 1.99E-06   |
| IGDCC4    | -1.40422082 | 5.69E-08   |
| CDH22     | -1.40221682 | 3.60E-05   |
| TCEAL6    | -1.40084794 | 7.83E-06   |
| NAT8L     | -1.4001559  | 1.92E-06   |
| CYP2J2    | -1.39972971 | 5.80E-19   |
| PTP4A3    | -1.39714107 | 2.73E-12   |
| SLAIN1    | -1.39709582 | 3.30E-07   |
| C14orf180 | -1.39686119 | 7.83E-06   |
| CLYBL     | -1.39675718 | 3.17E-09   |
| IL17B     | -1.39597662 | 5.38E-05   |
| BPIFB6    | -1.39545459 | 0.00049442 |
| CADPS2    | -1.39465894 | 3.67E-13   |
| C10orf90  | -1.3942129  | 1.50E-05   |
| EFHD1     | -1.39421264 | 1.13E-07   |
| TNFSF13   | -1.39377139 | 5.81E-18   |
| ABLIM2    | -1.39353691 | 9.63E-12   |
| CCDC81    | -1.39311671 | 0.00013368 |
| TMEM150C  | -1.39271292 | 2.40E-09   |
| PIK3R1    | -1.39269967 | 1.82E-18   |
| FHL5      | -1.39149373 | 8.03E-07   |
| MOGAT1    | -1.39102384 | 2.87E-05   |
| C14orf159 | -1.38907531 | 1.26E-28   |
| QPCT      | -1.38860974 | 3.32E-13   |
| OCLN      | -1.38810793 | 3.84E-11   |
| TSPAN1    | -1.38645954 | 5.17E-06   |
| NPPC      | -1.38645229 | 0.00191538 |
| BHMT2     | -1.38625453 | 4.95E-06   |

|          |             |            |
|----------|-------------|------------|
| IGFBP5   | -1.38483202 | 1.56E-09   |
| LRRIQ1   | -1.38343032 | 6.84E-05   |
| MEIS1    | -1.38298485 | 1.58E-13   |
| C1orf105 | -1.38241702 | 6.59E-05   |
| CA13     | -1.38163768 | 5.26E-11   |
| ZFP36    | -1.38142662 | 4.04E-17   |
| RBP7     | -1.38084747 | 2.40E-09   |
| FOXA1    | -1.38015294 | 1.71E-05   |
| FMO1     | -1.37948847 | 2.68E-09   |
| TMEM220  | -1.37897396 | 2.12E-09   |
| KLHDC9   | -1.37863574 | 1.46E-08   |
| DMPK     | -1.37828464 | 1.06E-12   |
| CD200R1  | -1.37803102 | 2.48E-06   |
| SPTSSB   | -1.37772702 | 1.18E-06   |
| WBSCR17  | -1.37527333 | 1.31E-06   |
| TSPAN19  | -1.37417395 | 1.25E-05   |
| CCDC64B  | -1.3724445  | 5.79E-11   |
| CEACAM6  | -1.37038171 | 1.33E-06   |
| MAGI1    | -1.36802055 | 2.29E-14   |
| SNED1    | -1.36767785 | 9.42E-08   |
| DNAH3    | -1.3662339  | 9.49E-05   |
| TBX3     | -1.36538407 | 5.13E-23   |
| ELF3     | -1.36521853 | 5.92E-09   |
| SOX17    | -1.36507824 | 9.52E-09   |
| LGR6     | -1.36381828 | 9.60E-07   |
| BNIP1    | -1.36322048 | 1.42E-09   |
| MYOG     | -1.36276679 | 0.00127449 |
| AK1      | -1.36248831 | 2.03E-17   |
| MTURN    | -1.36218738 | 4.60E-19   |
| LCN6     | -1.36100446 | 5.35E-05   |
| ROPN1B   | -1.3605518  | 0.00016773 |
| PLPP3    | -1.36003625 | 9.49E-17   |
| TEX101   | -1.3598697  | 1.09E-06   |
| TCEAL5   | -1.35767451 | 7.33E-05   |
| CCDC69   | -1.35557737 | 5.84E-17   |
| SBSN     | -1.35529508 | 1.89E-05   |
| MGST1    | -1.35522391 | 0.00025546 |
| SLC30A2  | -1.35489302 | 6.41E-05   |
| UBL3     | -1.35437387 | 2.79E-40   |
| FEM1A    | -1.35412325 | 1.68E-07   |
| WWC1     | -1.35355824 | 2.91E-21   |
| FZD4     | -1.35036638 | 5.33E-15   |
| MKRN2OS  | -1.35022096 | 8.37E-09   |
| SATB1    | -1.34940318 | 1.24E-12   |
| ME3      | -1.3491139  | 1.15E-10   |
| NFIB     | -1.3490393  | 5.43E-16   |
| AKAP6    | -1.34832521 | 2.52E-06   |



|           |             |            |
|-----------|-------------|------------|
| RBPMS     | -1.34692492 | 2.32E-16   |
| MESP1     | -1.34683448 | 1.98E-05   |
| CHADL     | -1.34553877 | 2.18E-10   |
| EFHC2     | -1.34537657 | 8.09E-06   |
| NCALD     | -1.34469925 | 3.97E-09   |
| DNAH10    | -1.34446152 | 0.00056965 |
| ZNF677    | -1.33974854 | 3.10E-05   |
| PSORS1C2  | -1.33936304 | 0.00045892 |
| REN       | -1.338773   | 2.28E-05   |
| KCNQ4     | -1.33803646 | 6.14E-07   |
| GNE       | -1.33799017 | 2.37E-14   |
| CLCNKA    | -1.33747763 | 4.91E-05   |
| MMP27     | -1.33623806 | 0.00011803 |
| SLC9A3    | -1.332887   | 1.10E-05   |
| MYO5B     | -1.33286705 | 3.40E-15   |
| CADM2     | -1.33231025 | 8.56E-05   |
| PLLP      | -1.33201169 | 3.36E-11   |
| TMEM47    | -1.33130491 | 1.56E-13   |
| ADGRA1    | -1.33001653 | 0.00016787 |
| SMIM10L2A | -1.32970783 | 1.08E-06   |
| FN3K      | -1.32926712 | 3.28E-11   |
| SELP      | -1.32791121 | 2.90E-08   |
| MYH14     | -1.32700564 | 8.61E-09   |
| CD36      | -1.32599669 | 2.50E-06   |
| MGAT4A    | -1.32341406 | 5.16E-13   |
| ADGRG2    | -1.32279536 | 0.00027353 |
| RIMS4     | -1.32253054 | 0.00019854 |
| ALDH1A3   | -1.32210986 | 8.13E-09   |
| RARB      | -1.32208432 | 8.51E-08   |
| CD164L2   | -1.32110031 | 6.63E-09   |
| SELE      | -1.32061513 | 1.22E-06   |
| CLUL1     | -1.3196746  | 0.00016689 |
| SCNN1G    | -1.31873567 | 8.70E-07   |
| SFTPA2    | -1.31820368 | 0.0012182  |
| MT-CO1    | -1.31817028 | 7.52E-22   |
| CD1C      | -1.31643474 | 2.08E-12   |
| ZNF662    | -1.31581691 | 1.86E-06   |
| PGM1      | -1.31547164 | 3.32E-28   |
| TMEM231   | -1.31411586 | 3.13E-07   |
| SULT2B1   | -1.31405563 | 4.59E-07   |
| MDH1B     | -1.31334656 | 0.00016327 |
| GPRC6A    | -1.31321081 | 2.25E-05   |
| RIC3      | -1.31298197 | 4.44E-05   |
| SERPINB13 | -1.31244035 | 2.54E-06   |
| CBX7      | -1.31225977 | 1.55E-16   |
| ARHGEF10L | -1.31126332 | 2.70E-31   |
| KRTAP4-1  | -1.31104954 | 8.19E-05   |

|           |             |            |
|-----------|-------------|------------|
| CYP4F22   | -1.31027755 | 0.0001222  |
| RBM47     | -1.30982937 | 4.73E-24   |
| TMPRSS11D | -1.30964328 | 9.00E-06   |
| HPSE2     | -1.30932263 | 8.01E-05   |
| EPHX3     | -1.30916837 | 0.00015947 |
| SLIT3     | -1.30909801 | 7.87E-10   |
| TMEM63A   | -1.30845421 | 4.21E-19   |
| TMEM45B   | -1.30817864 | 2.20E-06   |
| KCNAB1    | -1.30763841 | 1.92E-05   |
| SLPI      | -1.30751033 | 2.32E-07   |
| HRCT1     | -1.30738386 | 3.30E-06   |
| FAM110B   | -1.30514371 | 1.28E-08   |
| GKAP1     | -1.3046831  | 1.37E-07   |
| DUSP5     | -1.30397602 | 1.91E-14   |
| MT-ND3    | -1.30380884 | 3.87E-18   |
| ALDH9A1   | -1.30262031 | 5.13E-36   |
| EPS8L1    | -1.30206311 | 1.86E-10   |
| TEC       | -1.29931586 | 4.18E-08   |
| RGS7BP    | -1.29920129 | 4.91E-05   |
| FCGBP     | -1.2985629  | 2.39E-06   |
| CH25H     | -1.29845195 | 8.70E-09   |
| MEIS2     | -1.29741327 | 9.57E-10   |
| TMC4      | -1.2961156  | 1.96E-08   |
| HRASLS5   | -1.29394191 | 0.00029082 |
| GALNT5    | -1.29389906 | 3.63E-07   |
| CXCL2     | -1.2930171  | 3.43E-07   |
| CAPN13    | -1.29242013 | 0.00135733 |
| ZNF626    | -1.29239671 | 9.86E-05   |
| MAN1C1    | -1.29233845 | 2.19E-07   |
| FAIM2     | -1.29139826 | 0.00017361 |
| LTK       | -1.29125205 | 3.14E-05   |
| TRIL      | -1.2912333  | 3.34E-07   |
| PDZRN3    | -1.29090634 | 5.23E-11   |
| C1orf210  | -1.28805854 | 5.46E-20   |
| OTOP2     | -1.28779525 | 2.04E-05   |
| ZNF471    | -1.28703209 | 3.33E-05   |
| NDNF      | -1.28565533 | 5.77E-06   |
| PITX2     | -1.28545454 | 3.39E-08   |
| PLA2G4C   | -1.28529989 | 2.20E-09   |
| MYL6B     | -1.28503004 | 9.90E-18   |
| SPNS3     | -1.2840709  | 3.78E-05   |
| C3orf18   | -1.28373785 | 2.41E-09   |
| PAQR8     | -1.28183798 | 1.84E-12   |
| VWA7      | -1.2817939  | 3.38E-07   |
| PDE8B     | -1.27982215 | 9.79E-07   |
| MT-ND4L   | -1.27932715 | 2.29E-14   |
| FOS       | -1.27664903 | 1.29E-09   |

|          |             |            |
|----------|-------------|------------|
| TMEM200C | -1.27627773 | 0.00020983 |
| TNS2     | -1.27548079 | 2.47E-19   |
| PRPH2    | -1.27451094 | 3.78E-05   |
| CES3     | -1.27310528 | 9.74E-06   |
| ZNF429   | -1.27310119 | 3.50E-06   |
| ADAMTS8  | -1.27296932 | 0.00014665 |
| CRY2     | -1.27058249 | 1.36E-29   |
| KLB      | -1.26893687 | 0.00069099 |
| UGT1A7   | -1.26858583 | 0.00864667 |
| PLIN2    | -1.2682865  | 1.15E-11   |
| EGR1     | -1.26666578 | 9.47E-12   |
| ECM1     | -1.26583739 | 7.35E-09   |
| ZBED3    | -1.26583219 | 3.45E-08   |
| MT-ATP8  | -1.2655354  | 2.07E-12   |
| SPAG8    | -1.26464145 | 0.00039307 |
| LNX1     | -1.2634078  | 2.02E-14   |
| SPRY1    | -1.26139654 | 1.73E-20   |
| ITPR1    | -1.26101529 | 1.60E-11   |
| KLF4     | -1.26088132 | 3.54E-12   |
| ACYP2    | -1.2606507  | 1.91E-14   |
| HNMT     | -1.26046128 | 3.07E-13   |
| ATP1A3   | -1.25986283 | 2.47E-05   |
| LXN      | -1.25973868 | 2.83E-12   |
| GLP1R    | -1.25841074 | 0.00051891 |
| PTPRT    | -1.25838217 | 0.00063548 |
| ERICH5   | -1.25726839 | 0.00017558 |
| PLEKHA7  | -1.25680594 | 5.40E-15   |
| DGCR6    | -1.25660186 | 4.93E-09   |
| ADCY5    | -1.25632271 | 3.48E-05   |
| NTF3     | -1.2557599  | 2.35E-05   |
| TC2N     | -1.25568342 | 1.18E-14   |
| MAMDC2   | -1.25531579 | 4.67E-07   |
| ADAMTSL3 | -1.25523345 | 0.00014448 |
| PALMD    | -1.25500201 | 1.18E-19   |
| LRRC43   | -1.25379833 | 0.00033822 |
| ZNF385D  | -1.25338689 | 0.00022883 |
| ARG1     | -1.25198331 | 0.00830368 |
| NPDC1    | -1.25170227 | 3.22E-11   |
| ETNK2    | -1.25131664 | 1.90E-09   |
| MAPK8IP1 | -1.25013803 | 4.70E-11   |
| ANG      | -1.24742755 | 6.20E-13   |
| ALDH3B1  | -1.24651562 | 4.27E-09   |
| MAMSTR   | -1.24581182 | 9.86E-10   |
| CLEC10A  | -1.24580782 | 1.43E-08   |
| LBP      | -1.24534005 | 0.00160949 |
| DUSP1    | -1.24501569 | 6.08E-11   |
| FAM63A   | -1.2449568  | 2.79E-27   |

|           |             |            |
|-----------|-------------|------------|
| SERPINA12 | -1.24319167 | 0.00203448 |
| BCKDHB    | -1.24291905 | 1.07E-16   |
| CLEC4G    | -1.24246111 | 9.24E-05   |
| CISH      | -1.24170739 | 2.81E-16   |
| ACOT1     | -1.24133815 | 1.27E-08   |
| NME9      | -1.24018767 | 0.00035444 |
| ECSCR     | -1.24007634 | 1.46E-08   |
| KLF2      | -1.23826706 | 3.35E-14   |
| S100A9    | -1.23681623 | 2.57E-06   |
| CX3CL1    | -1.23677247 | 4.04E-07   |
| LCE1B     | -1.23648952 | 0.00316287 |
| DAGLA     | -1.23642221 | 5.16E-07   |
| S100A14   | -1.235711   | 3.01E-10   |
| HADH      | -1.23541575 | 8.93E-31   |
| KRTAP5-10 | -1.23417118 | 0.00265411 |
| SMPD3     | -1.2339309  | 8.90E-06   |
| SLC13A4   | -1.2327304  | 2.55E-05   |
| SIX2      | -1.22838388 | 1.52E-06   |
| TMEM8B    | -1.2251     | 3.62E-12   |
| PHYHD1    | -1.22428529 | 5.39E-05   |
| CD207     | -1.22406566 | 7.53E-06   |
| CCDC110   | -1.22196745 | 0.00015064 |
| RAB11FIP1 | -1.22195091 | 3.52E-10   |
| KIAA1456  | -1.22173483 | 0.00024301 |
| SYNC      | -1.22107425 | 2.17E-08   |
| SPRR1A    | -1.21904108 | 0.00022729 |
| ACSL1     | -1.2188414  | 3.51E-18   |
| C16orf45  | -1.21853825 | 6.11E-12   |
| AHSP      | -1.21763224 | 0.00075244 |
| LRIG1     | -1.21747401 | 4.28E-13   |
| MPP7      | -1.2172345  | 3.47E-14   |
| RNF208    | -1.21712474 | 1.36E-10   |
| RIIAD1    | -1.21686822 | 8.81E-05   |
| KRTAP5-4  | -1.2140029  | 0.00183132 |
| DBNDD1    | -1.21362314 | 5.05E-10   |
| GDF15     | -1.21174639 | 0.00040793 |
| SLC27A2   | -1.21130459 | 1.87E-05   |
| CYSLTR1   | -1.20851497 | 2.19E-05   |
| FAM171A1  | -1.20772381 | 3.93E-08   |
| TSPYL5    | -1.20719273 | 7.79E-06   |
| ADRA2A    | -1.20614572 | 6.83E-06   |
| GAS2      | -1.20581232 | 0.00049969 |
| SEZ6L     | -1.20569929 | 0.00069099 |
| TCP11L2   | -1.20560193 | 2.60E-11   |
| PECR      | -1.20526371 | 6.02E-09   |
| EYA1      | -1.2037436  | 7.17E-05   |
| PDE4C     | -1.20348946 | 0.00050065 |

|          |             |            |
|----------|-------------|------------|
| ZNF43    | -1.20333001 | 4.73E-05   |
| BLNK     | -1.20003462 | 7.71E-12   |
| PGPEP1   | -1.19971059 | 1.21E-11   |
| HYDIN    | -1.19964177 | 0.00024895 |
| RNASE4   | -1.19793886 | 0.00020818 |
| PCDH1    | -1.19741129 | 1.60E-14   |
| PRRT3    | -1.19694898 | 3.68E-06   |
| MT-ND2   | -1.19686005 | 3.90E-15   |
| ALDH2    | -1.19564718 | 4.03E-16   |
| STMN2    | -1.19509752 | 0.00104658 |
| BMP5     | -1.19498506 | 0.00020983 |
| STK39    | -1.19492914 | 5.48E-27   |
| EPHB6    | -1.19440928 | 8.29E-08   |
| ACSM1    | -1.19422565 | 0.00168487 |
| DIO2     | -1.19267675 | 1.18E-07   |
| SPHKAP   | -1.19263789 | 9.20E-05   |
| ASPG     | -1.19197277 | 7.48E-06   |
| SLC26A2  | -1.19059505 | 8.73E-14   |
| RGMA     | -1.19031319 | 1.76E-08   |
| EIF4E3   | -1.18993703 | 6.69E-13   |
| TMPRSS3  | -1.18822859 | 0.00018805 |
| PDCD4    | -1.18814388 | 1.67E-22   |
| CFAP100  | -1.18711294 | 0.00103273 |
| SORT1    | -1.18547691 | 2.92E-16   |
| GRHL3    | -1.18536403 | 8.51E-08   |
| TECRL    | -1.18527723 | 0.00030216 |
| TPPP     | -1.18408458 | 8.48E-09   |
| SLITRK5  | -1.18365575 | 0.00022643 |
| KLF9     | -1.18219767 | 2.93E-14   |
| S1PR1    | -1.18114292 | 1.88E-12   |
| CD24     | -1.18070025 | 2.68E-08   |
| SLC9A2   | -1.17997445 | 0.00032774 |
| LRRK2    | -1.17774061 | 8.36E-06   |
| TRIM2    | -1.1776889  | 4.70E-09   |
| APOC3    | -1.17726072 | 0.02166289 |
| ZNF835   | -1.17722241 | 0.00102372 |
| KRTAP9-2 | -1.17677301 | 2.75E-05   |
| CYP2E1   | -1.17654987 | 0.00016057 |
| RXRG     | -1.17608    | 0.00050103 |
| ACADS    | -1.17470645 | 2.06E-18   |
| RASL10B  | -1.17426589 | 7.70E-05   |
| SLC51B   | -1.17312261 | 0.00068519 |
| N4BP3    | -1.17248678 | 7.95E-16   |
| SYT8     | -1.1724106  | 0.00042463 |
| FAM196B  | -1.17229366 | 0.00452527 |
| SFRP5    | -1.17139873 | 0.00114836 |
| SLC22A31 | -1.17079623 | 0.00176201 |

|          |             |            |
|----------|-------------|------------|
| VAT1L    | -1.17007427 | 0.00150065 |
| TMEM232  | -1.16873988 | 0.00151153 |
| LYPD2    | -1.16709873 | 0.00287623 |
| CIPC     | -1.16697661 | 6.65E-28   |
| PHKA1    | -1.16620034 | 1.21E-15   |
| EVPL     | -1.16511068 | 6.25E-10   |
| ANGPT1   | -1.16393801 | 5.34E-05   |
| C15orf48 | -1.16379502 | 1.28E-07   |
| MT-ATP6  | -1.16366191 | 3.04E-15   |
| ALDH1A2  | -1.1636495  | 0.00117577 |
| CHCHD10  | -1.16328093 | 6.49E-10   |
| EVA1C    | -1.16325136 | 2.95E-11   |
| ALPK2    | -1.16204198 | 1.32E-05   |
| SLC37A1  | -1.16143858 | 3.30E-13   |
| SLC16A4  | -1.16103338 | 2.97E-05   |
| HMCN2    | -1.15994153 | 0.00038955 |
| SPRR2E   | -1.15892026 | 0.00150982 |
| PPP1R36  | -1.1585393  | 0.00143282 |
| PRKCQ    | -1.15700669 | 3.25E-08   |
| RNF125   | -1.15617729 | 1.80E-05   |
| PRR15    | -1.15586086 | 5.81E-05   |
| C1orf168 | -1.15513196 | 0.00028161 |
| CYP7B1   | -1.15475494 | 1.15E-09   |
| FAAH2    | -1.1547283  | 1.59E-11   |
| NCOA7    | -1.15417743 | 1.50E-16   |
| OGFRL1   | -1.15401911 | 2.25E-20   |
| TMPRSS5  | -1.1537463  | 0.00075969 |
| ZNF331   | -1.15233535 | 4.22E-09   |
| SMIM6    | -1.15195    | 0.00177627 |
| TMEM170B | -1.1519189  | 0.00013976 |
| PCCA     | -1.1516545  | 3.46E-13   |
| RHBG     | -1.15090161 | 0.00033645 |
| LMO1     | -1.1499472  | 5.06E-05   |
| SVEP1    | -1.14942142 | 2.89E-07   |
| SESN1    | -1.14868031 | 4.30E-20   |
| IQCD     | -1.14855463 | 8.63E-05   |
| KLK11    | -1.14812842 | 2.35E-06   |
| LRRC38   | -1.14717798 | 0.00056683 |
| SETMAR   | -1.14624511 | 7.41E-14   |
| ALDH3A1  | -1.14578628 | 0.00163585 |
| LMO7     | -1.14575757 | 1.45E-10   |
| CTNND2   | -1.14537314 | 0.0034529  |
| CCDC113  | -1.14488747 | 2.30E-06   |
| FAM179A  | -1.14462264 | 0.00106472 |
| CD302    | -1.14458905 | 7.20E-06   |
| CLTCL1   | -1.14326846 | 7.43E-09   |
| SMOC2    | -1.14213122 | 8.00E-07   |

|           |             |            |
|-----------|-------------|------------|
| B3GALT5   | -1.1416363  | 0.00195764 |
| CD1E      | -1.14019191 | 1.12E-06   |
| KCNK15    | -1.1401597  | 0.00033828 |
| EPS8L3    | -1.14006636 | 0.00221123 |
| PNMT      | -1.13998365 | 0.00079449 |
| SUSD4     | -1.13960807 | 5.00E-06   |
| PARM1     | -1.13898953 | 9.86E-05   |
| SAMD13    | -1.13770069 | 0.00074802 |
| RMND5B    | -1.13652819 | 3.79E-24   |
| LYG2      | -1.13515383 | 0.00396777 |
| 3-Mar     | -1.13319013 | 1.95E-06   |
| KRTAP10-6 | -1.13250784 | 0.00011916 |
| ELOVL4    | -1.13210312 | 6.59E-06   |
| MUM1L1    | -1.1319804  | 8.94E-05   |
| DDAH2     | -1.13184169 | 7.27E-21   |
| SLC16A9   | -1.13083413 | 1.84E-06   |
| P2RX6     | -1.13047349 | 0.00022063 |
| ABHD5     | -1.13026077 | 4.63E-21   |
| ABO       | -1.13003722 | 0.00011974 |
| EDA2R     | -1.12770968 | 0.00012711 |
| NXPH3     | -1.12724839 | 0.00033645 |
| TLR5      | -1.12589397 | 3.47E-11   |
| CPXM2     | -1.12429652 | 7.57E-08   |
| PINK1     | -1.12366001 | 8.13E-19   |
| ATL1      | -1.12321942 | 1.30E-07   |
| USP54     | -1.12304053 | 9.14E-16   |
| NFIA      | -1.12303953 | 1.60E-18   |
| C15orf52  | -1.12273242 | 4.69E-10   |
| JADE1     | -1.12248554 | 4.68E-11   |
| ADRA1A    | -1.12215279 | 0.00099082 |
| SMDT1     | -1.12092985 | 3.58E-22   |
| ASAP3     | -1.12088595 | 1.33E-17   |
| ANKRD53   | -1.12082878 | 0.00045528 |
| ABCC9     | -1.12051377 | 6.82E-06   |
| ZDHHC2    | -1.12043194 | 5.39E-07   |
| PIK3AP1   | -1.11960389 | 9.31E-07   |
| SLC25A20  | -1.11736952 | 2.04E-23   |
| ATP10B    | -1.11643901 | 1.13E-05   |
| BAMBI     | -1.11632247 | 3.94E-06   |
| LHFPL1    | -1.11570335 | 0.00212778 |
| IL13      | -1.11458418 | 0.00312373 |
| ANKRD6    | -1.11426215 | 2.57E-06   |
| SERPINB1  | -1.11418144 | 6.26E-09   |
| CACNA2D3  | -1.11386049 | 3.94E-07   |
| KIAA2012  | -1.11367486 | 0.00022476 |
| OTOP3     | -1.11275471 | 0.0038403  |
| C15orf59  | -1.1126002  | 2.95E-05   |

|          |             |            |
|----------|-------------|------------|
| CGREF1   | -1.11245249 | 3.23E-05   |
| MT1X     | -1.11223689 | 1.55E-09   |
| NTN4     | -1.1115693  | 5.63E-12   |
| IDH2     | -1.11123663 | 4.33E-19   |
| ZCWPW2   | -1.11057788 | 0.00150065 |
| BMX      | -1.10934395 | 0.00013608 |
| F8       | -1.10910509 | 5.67E-06   |
| SMIM1    | -1.10698223 | 2.12E-05   |
| KCNT1    | -1.10549961 | 0.00109792 |
| MCF2L    | -1.10487473 | 7.20E-06   |
| ADORA1   | -1.10471016 | 5.85E-05   |
| IRX6     | -1.10369235 | 0.0052918  |
| PER2     | -1.10306771 | 1.53E-14   |
| ARHGAP6  | -1.10220857 | 0.00064845 |
| ACSM5    | -1.10187814 | 0.00165362 |
| GSTA1    | -1.10120904 | 0.04772378 |
| OSCP1    | -1.10102915 | 5.33E-09   |
| TSPAN6   | -1.1003961  | 6.53E-19   |
| PLAC8    | -1.10020933 | 0.00183189 |
| CLDN7    | -1.09978426 | 7.20E-07   |
| ZNF135   | -1.09968485 | 0.00135463 |
| TMEM178B | -1.09921396 | 0.00274693 |
| TPPP2    | -1.09864095 | 0.00014431 |
| SCRG1    | -1.0973966  | 0.0034529  |
| CXXC4    | -1.09716873 | 0.0026614  |
| ZNF185   | -1.09574765 | 3.50E-08   |
| JAM2     | -1.09517934 | 2.77E-08   |
| CPED1    | -1.09481703 | 9.76E-06   |
| GUCY2C   | -1.0944244  | 3.57E-05   |
| ARX      | -1.09442187 | 0.00132055 |
| CADM3    | -1.09376105 | 1.79E-05   |
| KLK3     | -1.09266101 | 0.00577248 |
| STX19    | -1.09144565 | 7.96E-08   |
| PLCL2    | -1.09113547 | 1.14E-07   |
| ZNF737   | -1.09083216 | 0.00061229 |
| LRRC23   | -1.09006341 | 8.22E-09   |
| CCL19    | -1.08921301 | 0.00096513 |
| MICU3    | -1.08910195 | 0.00135463 |
| C16orf71 | -1.08793679 | 0.00379891 |
| LGALS1   | -1.08788117 | 5.24E-07   |
| SPINK14  | -1.08756124 | 0.00099082 |
| PDK2     | -1.08734018 | 2.88E-15   |
| SIAE     | -1.08669015 | 5.90E-14   |
| DYDC1    | -1.08573623 | 0.00054387 |
| CROCC2   | -1.08536734 | 0.00196654 |
| ABHD1    | -1.08494539 | 0.00147404 |
| SMIM10   | -1.0843763  | 1.06E-06   |



|          |             |            |
|----------|-------------|------------|
| IL5RA    | -1.08385442 | 0.0049494  |
| S100B    | -1.0836309  | 1.43E-07   |
| DOPEY2   | -1.08312525 | 8.68E-18   |
| CPEB4    | -1.08266823 | 1.02E-12   |
| LRFN2    | -1.08222184 | 0.00147404 |
| AQP3     | -1.08076661 | 3.80E-05   |
| MT-CO3   | -1.0801015  | 1.04E-14   |
| SPAG16   | -1.07981574 | 2.22E-07   |
| EYA4     | -1.07945162 | 0.00030106 |
| B3GNT7   | -1.07801882 | 1.32E-06   |
| NFIC     | -1.07709084 | 2.42E-21   |
| APOA1    | -1.07680497 | 0.00905969 |
| DIRAS3   | -1.07485296 | 5.49E-05   |
| TREH     | -1.07468563 | 0.00228374 |
| RAP1GAP  | -1.07430362 | 5.68E-08   |
| MAPKAPK3 | -1.0736383  | 2.97E-22   |
| A2M      | -1.07321146 | 3.56E-09   |
| IL11RA   | -1.07191266 | 2.19E-09   |
| C2orf50  | -1.07181218 | 0.0034529  |
| RNF123   | -1.07173032 | 3.17E-16   |
| EFCAB12  | -1.07170299 | 0.00160742 |
| GATS     | -1.07064399 | 1.59E-07   |
| UBE2QL1  | -1.07036926 | 1.34E-05   |
| CUTC     | -1.07007691 | 3.08E-19   |
| NEK5     | -1.06934073 | 0.0074468  |
| ARHGEF26 | -1.0680855  | 8.87E-05   |
| LY6G6C   | -1.0679597  | 0.00177739 |
| CRYL1    | -1.06791412 | 2.28E-17   |
| FAM46B   | -1.06756362 | 5.52E-06   |
| SUCLG2   | -1.06728174 | 5.25E-37   |
| OLAH     | -1.06700287 | 0.0059822  |
| PCDHB4   | -1.06696892 | 0.00045654 |
| PLEKHG7  | -1.06630374 | 0.00429256 |
| LMO3     | -1.06571968 | 0.00370359 |
| SLC46A3  | -1.06536716 | 1.15E-08   |
| PCOLCE2  | -1.06361482 | 0.00059621 |
| CCDC89   | -1.06228443 | 0.0034579  |
| CCNG1    | -1.06224688 | 4.77E-22   |
| PLS1     | -1.0616588  | 5.21E-08   |
| SMAGP    | -1.06162378 | 3.07E-16   |
| ASB8     | -1.06112388 | 3.14E-24   |
| CCDC85A  | -1.06088551 | 0.00429256 |
| PDE1A    | -1.06063659 | 0.0009085  |
| MT-ND4   | -1.06047998 | 6.69E-13   |
| GLUL     | -1.058759   | 7.74E-11   |
| PLCH1    | -1.05874134 | 0.00170193 |
| SLC47A1  | -1.05855926 | 2.67E-05   |

|           |             |            |
|-----------|-------------|------------|
| SHMT1     | -1.05849079 | 2.64E-18   |
| COL14A1   | -1.05847128 | 8.42E-06   |
| TFF2      | -1.05813708 | 0.01447155 |
| ZNF704    | -1.05786105 | 1.52E-06   |
| ZNF880    | -1.05760208 | 7.04E-06   |
| CYSTM1    | -1.05607329 | 5.31E-13   |
| LRRN1     | -1.05596514 | 0.00092769 |
| PLEKHG6   | -1.0558679  | 1.56E-06   |
| C1orf64   | -1.05565938 | 0.00990163 |
| REEP6     | -1.05498513 | 1.59E-08   |
| PRADC1    | -1.05477928 | 1.13E-17   |
| ECHDC2    | -1.05455699 | 1.03E-10   |
| ALOX15B   | -1.05363704 | 0.0017464  |
| SECISBP2L | -1.05297832 | 4.62E-17   |
| TNFAIP8L3 | -1.05164775 | 7.29E-10   |
| SLC2A10   | -1.05098982 | 4.58E-07   |
| LRRC4C    | -1.05068911 | 0.00570474 |
| MLYCD     | -1.04915762 | 2.10E-05   |
| SH3BP5    | -1.04862847 | 4.32E-07   |
| ITGA9     | -1.04770396 | 1.01E-06   |
| MTFR1L    | -1.04749158 | 3.62E-22   |
| RBBP8NL   | -1.0468558  | 1.41E-07   |
| SPRY2     | -1.04676418 | 4.16E-11   |
| ENKUR     | -1.04661207 | 0.00221811 |
| C11orf96  | -1.04654254 | 1.17E-05   |
| CLDN5     | -1.04596223 | 1.13E-06   |
| PTPN20    | -1.04580131 | 0.00061229 |
| RPH3AL    | -1.04491478 | 3.38E-06   |
| SLC19A2   | -1.04426448 | 7.08E-14   |
| ZFP2      | -1.04413233 | 0.00437101 |
| FBLN5     | -1.04400359 | 3.76E-08   |
| STXBP6    | -1.04383171 | 0.00058301 |
| FAM46C    | -1.04376099 | 3.97E-05   |
| UGP2      | -1.04328473 | 8.80E-26   |
| PLA1A     | -1.04293257 | 1.98E-05   |
| KALRN     | -1.0414521  | 4.06E-05   |
| SLC25A12  | -1.0402696  | 6.88E-23   |
| WFIKKN2   | -1.04013761 | 0.00309391 |
| NDUFS1    | -1.03995726 | 1.19E-24   |
| EPB41L3   | -1.03886355 | 6.96E-09   |
| SSPN      | -1.03866801 | 3.34E-08   |
| PHYHIP    | -1.03823076 | 0.00093715 |
| SGSM1     | -1.0380596  | 0.00726821 |
| TMEM217   | -1.03796815 | 0.00023837 |
| ACO2      | -1.03738909 | 3.68E-24   |
| ISOC1     | -1.03728306 | 7.81E-23   |
| SYTL5     | -1.03661242 | 0.00110206 |

|             |             |            |
|-------------|-------------|------------|
| FAM183A     | -1.03580244 | 7.40E-06   |
| CTB-102L5.4 | -1.035309   | 0.00031698 |
| ADRB1       | -1.03501273 | 0.00123808 |
| GYG2        | -1.03481494 | 0.00011221 |
| KIF1C       | -1.03461555 | 1.47E-18   |
| TUB         | -1.03458672 | 5.14E-06   |
| SLC16A14    | -1.03411283 | 2.11E-06   |
| SLC39A8     | -1.03404666 | 9.93E-09   |
| SLC27A1     | -1.03394395 | 5.36E-11   |
| SSBP2       | -1.03384324 | 1.08E-07   |
| RORA        | -1.03372308 | 2.61E-08   |
| CTB-55O6.8  | -1.03294529 | 5.51E-07   |
| HAAO        | -1.03285856 | 4.01E-07   |
| VIPR2       | -1.03277983 | 0.00266811 |
| DOK7        | -1.03203493 | 9.24E-05   |
| CATSPERD    | -1.03057075 | 0.00190279 |
| ZNF750      | -1.02984236 | 5.08E-07   |
| GIPC2       | -1.02962742 | 0.00036678 |
| ITIH5       | -1.02931055 | 1.93E-05   |
| AGTR1       | -1.02866962 | 0.00326221 |
| PLCXD3      | -1.0263305  | 0.00099082 |
| BBOF1       | -1.0250654  | 3.85E-05   |
| SBK1        | -1.02498363 | 0.00033595 |
| TRAK1       | -1.02463887 | 3.42E-23   |
| HADHB       | -1.02452167 | 3.86E-30   |
| GCOM1       | -1.02441762 | 0.00436745 |
| ABLIM1      | -1.02438948 | 4.96E-11   |
| ANKRD37     | -1.02405873 | 2.10E-07   |
| CCL17       | -1.02318561 | 2.18E-05   |
| APOLD1      | -1.02302102 | 5.51E-10   |
| SBSPON      | -1.02284944 | 0.0010505  |
| GRAMD3      | -1.0227852  | 4.96E-12   |
| ACAD8       | -1.0221343  | 1.25E-10   |
| ADGRB3      | -1.0214675  | 0.00686131 |
| EFCAB6      | -1.02132035 | 0.00577099 |
| SPRR2G      | -1.02121261 | 0.0125549  |
| TMEM40      | -1.02113551 | 5.50E-07   |
| CLMN        | -1.02084885 | 3.16E-05   |
| SLC5A1      | -1.02021887 | 0.00063749 |
| PMP2        | -1.01941226 | 0.00405426 |
| CABLES1     | -1.01940136 | 1.23E-06   |
| CCDC151     | -1.01880342 | 0.00785604 |
| EFCAB1      | -1.01871422 | 0.00322111 |
| HOGA1       | -1.01865287 | 0.00125333 |
| GPRASP2     | -1.01863757 | 1.78E-08   |
| PPP1R32     | -1.01863739 | 0.00105332 |
| TMPRSS11F   | -1.01685589 | 0.00016615 |

|          |             |            |
|----------|-------------|------------|
| RGS16    | -1.01662106 | 3.41E-06   |
| C1QTNF9  | -1.0153652  | 0.0034529  |
| IL26     | -1.0138387  | 0.01114591 |
| FTCDNL1  | -1.01323102 | 8.56E-05   |
| EFNA5    | -1.01313521 | 3.98E-12   |
| SNAI3    | -1.01242843 | 2.56E-05   |
| UBE2D4   | -1.01239272 | 8.48E-13   |
| CA14     | -1.0121841  | 0.00146404 |
| TMEM71   | -1.01204078 | 0.00043199 |
| RNF222   | -1.01189984 | 0.00057603 |
| MEDAG    | -1.01169031 | 2.56E-05   |
| RGS11    | -1.01015755 | 0.00146404 |
| ACTA2    | -1.00970369 | 1.46E-06   |
| RELN     | -1.00964651 | 0.00277707 |
| POU2F3   | -1.00960286 | 0.00012301 |
| PIH1D2   | -1.00944401 | 0.00090303 |
| CACNA2D2 | -1.00876844 | 0.00236902 |
| FES      | -1.00845708 | 2.94E-09   |
| SHISA9   | -1.00842781 | 0.00099082 |
| SPATA4   | -1.00839363 | 0.00183733 |
| LCA5     | -1.00817554 | 9.13E-05   |
| RASL12   | -1.00795193 | 9.26E-08   |
| GPRC5C   | -1.0078318  | 3.22E-08   |
| TACC2    | -1.00773608 | 2.73E-16   |
| LVRN     | -1.00758008 | 0.00722344 |
| VWCE     | -1.00757513 | 0.00471942 |
| GATA3    | -1.00685444 | 1.63E-05   |
| PHGDH    | -1.00559826 | 2.33E-06   |
| FOXO4    | -1.00535056 | 1.84E-17   |
| SLC2A5   | -1.00508476 | 2.50E-05   |
| ABCD2    | -1.00449056 | 0.0040546  |
| KCNRG    | -1.00412378 | 0.00620824 |
| BEND5    | -1.00398252 | 0.00051716 |
| ELN      | -1.00377863 | 0.00028412 |
| GPR162   | -1.00370111 | 0.00115569 |
| RNF223   | -1.0036346  | 8.71E-06   |
| CYB5A    | -1.00311405 | 3.47E-09   |
| TSGA10   | -1.00245452 | 0.00182166 |
| CYTL1    | -1.00209993 | 2.43E-05   |
| TPT1     | -1.00150615 | 6.22E-20   |

## uniCoxKM

| Gene          | HR              | z               | Pr(> z )        | Gene     | HR       | z        | Pr(> z ) |
|---------------|-----------------|-----------------|-----------------|----------|----------|----------|----------|
| <b>CLDN8</b>  | <b>1.047281</b> | <b>2.397029</b> | <b>0.016529</b> | COX6A2   | 1.001143 | 0.66476  | 0.506204 |
| <b>PLAU</b>   | <b>1.001842</b> | <b>2.256498</b> | <b>0.024039</b> | FST      | 1.001086 | 0.660395 | 0.509001 |
| <b>CDKN2A</b> | <b>0.986783</b> | <b>-2.01753</b> | <b>0.04364</b>  | APOBEC3B | 0.995491 | -0.6582  | 0.510409 |
| GPD1L         | 1.038865        | 1.850151        | 0.064292        | FXYD1    | 1.032662 | 0.641313 | 0.521319 |
| DMBT1         | 0.959193        | -1.84535        | 0.064986        | ACADSB   | 1.038946 | 0.640896 | 0.52159  |
| ABL2          | 1.070589        | 1.75148         | 0.079863        | TFF3     | 0.996074 | -0.63665 | 0.524352 |
| DKK1          | 1.006665        | 1.718727        | 0.085664        | MAGEA12  | 1.006599 | 0.633447 | 0.526442 |
| GAS7          | 0.93733         | -1.70906        | 0.08744         | IFI6     | 0.999907 | -0.61625 | 0.53773  |
| KIF23         | 1.043155        | 1.659753        | 0.096964        | CRISP2   | 0.771022 | -0.60367 | 0.546063 |
| UBE2C         | 1.005047        | 1.654164        | 0.098094        | OASL     | 0.997663 | -0.59729 | 0.550314 |
| RSAD2         | 0.99141         | -1.60848        | 0.10773         | TF       | 0.979162 | -0.59603 | 0.551153 |
| TK1           | 1.003235        | 1.604113        | 0.108689        | CA3      | 1.006206 | 0.595839 | 0.551283 |
| CXCL13        | 0.993302        | -1.55363        | 0.120273        | TNNC1    | 1.000412 | 0.587372 | 0.556954 |
| AZGP1         | 0.984635        | -1.54441        | 0.122488        | ENO3     | 1.001933 | 0.585905 | 0.557939 |
| PPP1R3C       | 1.012814        | 1.536197        | 0.12449         | PYGM     | 1.002243 | 0.583883 | 0.559299 |
| KIF14         | 1.083652        | 1.505951        | 0.13208         | ISG15    | 0.999913 | -0.58012 | 0.561836 |
| FMO2          | 0.974259        | -1.4942         | 0.135122        | COL4A1   | 0.998871 | -0.56529 | 0.571879 |
| CLDN10        | 0.941266        | -1.4668         | 0.142432        | CSRP3    | 1.000467 | 0.553077 | 0.580211 |
| NEFL          | 0.991902        | -1.46015        | 0.144248        | MFAP4    | 0.996564 | -0.55115 | 0.581531 |
| HOMER3        | 0.988748        | -1.44423        | 0.148674        | ACTA1    | 1.000054 | 0.550016 | 0.582308 |
| PLP1          | 1.208812        | 1.444154        | 0.148696        | MYH6     | 1.014986 | 0.547467 | 0.584058 |
| TRIP13        | 1.016043        | 1.417554        | 0.156321        | MMP1     | 0.99992  | -0.53936 | 0.589638 |
| ADH1B         | 1.181706        | 1.395684        | 0.16281         | PKIA     | 1.006749 | 0.532804 | 0.59417  |
| PEG3          | 0.775589        | -1.38685        | 0.165489        | FSTL3    | 0.997944 | -0.52462 | 0.599845 |
| CFD           | 1.008284        | 1.359777        | 0.1739          | GNLY     | 0.996181 | -0.50443 | 0.613963 |
| CRISP3        | 0.985181        | -1.35908        | 0.174121        | TJP3     | 0.984531 | -0.49398 | 0.621318 |
| ADAM12        | 0.984897        | -1.35479        | 0.175486        | TTN      | 1.005121 | 0.485908 | 0.627033 |
| WIF1          | 1.021973        | 1.335054        | 0.181859        | LAMC2    | 1.000157 | 0.482505 | 0.629448 |
| LTBP1         | 0.994888        | -1.32844        | 0.184032        | CXCL11   | 1.000572 | 0.478781 | 0.632095 |
| ATP1A2        | 1.011104        | 1.319351        | 0.187052        | PLA2G7   | 0.990356 | -0.47043 | 0.63805  |
| EEF1A2        | 1.001468        | 1.312435        | 0.189373        | HLA-F    | 1.001462 | 0.45314  | 0.650448 |
| MYH2          | 1.000522        | 1.269945        | 0.204104        | PXDN     | 0.996799 | -0.44821 | 0.654001 |
| MYBPC1        | 1.001702        | 1.266737        | 0.205249        | HSD17B6  | 1.041084 | 0.435923 | 0.662892 |
| PROM1         | 0.907146        | -1.25252        | 0.210379        | CHRDL1   | 1.016671 | 0.433982 | 0.664302 |
| CYP3A5        | 1.208253        | 1.243827        | 0.213563        | VEGFC    | 1.002886 | 0.433268 | 0.66482  |
| AMPD1         | 1.021823        | 1.234901        | 0.216867        | PDPN     | 0.998803 | -0.42555 | 0.670434 |
| ITGA5         | 1.004261        | 1.233659        | 0.21733         | MYRIP    | 0.687632 | -0.42377 | 0.671736 |
| RNASE4        | 0.503472        | -1.23227        | 0.217849        | ABCA8    | 0.937236 | -0.41934 | 0.674971 |
| PLA2G2A       | 0.995782        | -1.21203        | 0.225501        | COL4A2   | 0.999166 | -0.41783 | 0.676071 |
| STATH         | 0.982101        | -1.18543        | 0.235847        | HSPB2    | 1.014984 | 0.416549 | 0.677008 |
| FOXM1         | 1.0085          | 1.172978        | 0.240805        | EPHX2    | 0.989001 | -0.41404 | 0.678843 |
| CKMT2         | 1.009456        | 1.167709        | 0.242924        | MEOX2    | 0.956438 | -0.40918 | 0.682409 |
| LTF           | 0.998655        | -1.16407        | 0.244396        | CILP     | 0.985815 | -0.40043 | 0.688839 |
| CKM           | 1.000209        | 1.147205        | 0.251297        | MMP3     | 0.9997   | -0.39698 | 0.691383 |
| ALOX12        | 0.986002        | -1.12764        | 0.259471        | DPT      | 0.996459 | -0.38814 | 0.69791  |

|          |          |          |          |          |          |          |          |
|----------|----------|----------|----------|----------|----------|----------|----------|
| MMP9     | 0.99921  | -1.12312 | 0.261386 | EYA2     | 1.004247 | 0.383245 | 0.701538 |
| TMPRSS2  | 0.96319  | -1.10436 | 0.269438 | TFF1     | 1.002939 | 0.381086 | 0.70314  |
| PPARG    | 1.079683 | 1.103486 | 0.269816 | CRYAB    | 1.000477 | 0.380139 | 0.703842 |
| TPX2     | 1.004306 | 1.088685 | 0.276293 | TLE2     | 0.985808 | -0.37349 | 0.708786 |
| ATP2A1   | 1.002604 | 1.08544  | 0.277727 | SELENBP1 | 0.992549 | -0.36951 | 0.711749 |
| TNNI2    | 1.000538 | 1.075254 | 0.282261 | TNNC2    | 1.000294 | 0.354346 | 0.72308  |
| THY1     | 0.994311 | -1.06228 | 0.28811  | SLC7A8   | 0.999288 | -0.333   | 0.739135 |
| MMP12    | 0.998091 | -1.02223 | 0.306672 | ARPC1B   | 1.000812 | 0.328847 | 0.742272 |
| SPP1     | 0.999654 | -1.02033 | 0.307572 | TCAP     | 1.000264 | 0.303434 | 0.761559 |
| MMP10    | 0.999573 | -1.00261 | 0.316049 | SCG5     | 1.008664 | 0.284608 | 0.775944 |
| MYOM1    | 1.011185 | 0.990349 | 0.322004 | MYL2     | 1.000162 | 0.28358  | 0.776733 |
| ITGB4    | 1.000913 | 0.986858 | 0.323712 | HBB      | 0.99904  | -0.2756  | 0.782856 |
| SERPINH1 | 1.001672 | 0.98534  | 0.324457 | SLITRK5  | 0.755929 | -0.27298 | 0.784867 |
| IGFBP3   | 1.000684 | 0.976726 | 0.328705 | PTHLH    | 1.000299 | 0.268547 | 0.788278 |
| LAMB3    | 1.000407 | 0.974202 | 0.329956 | PRELP    | 0.996343 | -0.26538 | 0.790717 |
| HLF      | 0.954474 | -0.95973 | 0.337191 | NR3C2    | 1.044184 | 0.263838 | 0.791905 |
| PIP      | 0.992295 | -0.95534 | 0.339406 | ANG      | 0.986138 | -0.24867 | 0.803612 |
| MMP13    | 0.999508 | -0.95056 | 0.341827 | CDH3     | 0.999656 | -0.23918 | 0.810963 |
| COBL     | 1.075785 | 0.933834 | 0.35039  | MMP11    | 1.000375 | 0.227959 | 0.819678 |
| PLN      | 1.018024 | 0.933073 | 0.350782 | RBP1     | 0.99945  | -0.22054 | 0.82545  |
| TMOD1    | 1.013042 | 0.881463 | 0.378067 | AIM2     | 1.001563 | 0.210577 | 0.833217 |
| SLN      | 1.000724 | 0.879163 | 0.379313 | CXCL10   | 0.999938 | -0.20659 | 0.836331 |
| GULP1    | 1.117663 | 0.875237 | 0.381445 | FUT6     | 1.00538  | 0.18951  | 0.849693 |
| KIF2C    | 1.009992 | 0.845653 | 0.397746 | MAL      | 0.99988  | -0.17058 | 0.864554 |
| CYP27B1  | 1.016674 | 0.845332 | 0.397926 | FAP      | 1.002902 | 0.153567 | 0.877951 |
| CXCL9    | 0.999173 | -0.83895 | 0.401497 | COL11A1  | 0.999286 | -0.14401 | 0.885493 |
| IFIT3    | 0.998721 | -0.83468 | 0.403899 | BNC1     | 1.000745 | 0.142184 | 0.886935 |
| ALDH1A1  | 1.001329 | 0.827215 | 0.408115 | TLR5     | 0.99198  | -0.1385  | 0.889841 |
| ACOX2    | 0.752132 | -0.8206  | 0.411877 | SERPINE1 | 1.000059 | 0.130473 | 0.896193 |
| ACP5     | 0.997193 | -0.80794 | 0.419126 | ADIPOQ   | 1.014448 | 0.125152 | 0.900403 |
| MB       | 1.000375 | 0.8011   | 0.423074 | TGFBR3   | 1.007928 | 0.124989 | 0.900532 |
| NEB      | 1.003027 | 0.7968   | 0.425567 | NELL2    | 1.000591 | 0.118213 | 0.905899 |
| LGALS3BP | 1.000563 | 0.7758   | 0.437867 | BST2     | 1.00004  | 0.117479 | 0.906481 |
| MYL1     | 1.000368 | 0.774727 | 0.438501 | MYH7     | 0.999885 | -0.09656 | 0.923077 |
| COL4A6   | 1.010808 | 0.759039 | 0.447829 | COL7A1   | 1.000221 | 0.089536 | 0.928656 |
| RGS20    | 0.978965 | -0.75831 | 0.448265 | PBX1     | 0.996048 | -0.08156 | 0.934999 |
| SYNGR1   | 0.965545 | -0.75637 | 0.44943  | MYLPF    | 0.999873 | -0.07634 | 0.939151 |
| PSMB9    | 1.002037 | 0.720482 | 0.471228 | FN1      | 1.000021 | 0.071862 | 0.942712 |
| LIFR     | 0.956552 | -0.70373 | 0.481599 | SCNN1B   | 1.000834 | 0.047313 | 0.962264 |
| COX7A1   | 1.003706 | 0.701878 | 0.482755 | PTK7     | 0.999738 | -0.0423  | 0.966256 |
| ACTN2    | 1.000984 | 0.699066 | 0.484511 | KRT4     | 0.999997 | -0.02535 | 0.979779 |
| APOD     | 1.002899 | 0.689299 | 0.490635 | RRAGD    | 1.000609 | 0.022121 | 0.982351 |
| PCDH7    | 0.991738 | -0.67673 | 0.498579 | PPP1R1A  | 0.999672 | -0.01362 | 0.989135 |
| TSPAN8   | 0.944661 | -0.66499 | 0.506057 | MYOC     | 1.00014  | 0.000832 | 0.999336 |
